# Supplementary material for: The dura mater maintains B cell lymphopoietic capacity during chronic Trypanosoma brucei infection
Source: Research Square preprint supplement (doi:10.21203/rs.3.rs-8621800/v1), 2026-01-21
Supplement: Supplementary file 1 [file cff7cfb9d3d01fc04aa831a9.xlsx]

## Sheet: Supplementary table 1
Supplementary table 1 - Bulk transcriptomics quality control checks and mapping results
Tissue	Experimental group	Replicate	raw_reads	raw_bases	clean_reads	clean_bases	error_rate	Q20	Q30	GC_pct	total_reads	total_map	unique_map	multi_map	read1_map	read2_map	positive_map	negative_map	splice_map	unsplice_map	proper_map
Femur bone marrow	Naïve	1	81604378	12.24G	79530106	11.93G	0.01	98.54	95.87	51.75	79530106	77021141(96.85%)	62112722(78.1%)	14908419(18.75%)	31093958(39.1%)	31018764(39.0%)	31020698(39.0%)	31092024(39.09%)	27757694(34.9%)	34355028(43.2%)	60719694(76.35%)
Femur bone marrow	Naïve	2	73217384	10.98G	71131222	10.67G	0.01	98.5	95.79	51.54	71131222	68702077(96.58%)	55205216(77.61%)	13496861(18.97%)	27639339(38.86%)	27565877(38.75%)	27573268(38.76%)	27631948(38.85%)	23667481(33.27%)	31537735(44.34%)	53867070(75.73%)
Femur bone marrow	Naïve	3	74526646	11.18G	71773276	10.77G	0.01	98.59	95.96	51.74	71773276	69223276(96.45%)	57687964(80.38%)	11535312(16.07%)	28868927(40.22%)	28819037(40.15%)	28812080(40.14%)	28875884(40.23%)	27302991(38.04%)	30384973(42.33%)	56276844(78.41%)
Femur bone marrow	Naïve	4	65917074	9.89G	63835726	9.58G	0.01	98.59	95.96	51.58	63835726	61960815(97.06%)	50939173(79.8%)	11021642(17.27%)	25506003(39.96%)	25433170(39.84%)	25435124(39.84%)	25504049(39.95%)	23590244(36.95%)	27348929(42.84%)	49757278(77.95%)
Femur bone marrow	Infected	1	66813866	10.02G	64539842	9.68G	0.01	98.51	95.76	51.02	64539842	62146748(96.29%)	55199731(85.53%)	6947017(10.76%)	27637593(42.82%)	27562138(42.71%)	27566011(42.71%)	27633720(42.82%)	25323568(39.24%)	29876163(46.29%)	53761138(83.3%)
Femur bone marrow	Infected	2	67855336	10.18G	65627256	9.84G	0.01	98.56	95.83	51.07	65627256	63369009(96.56%)	55671773(84.83%)	7697236(11.73%)	27875747(42.48%)	27796026(42.35%)	27805218(42.37%)	27866555(42.46%)	25815983(39.34%)	29855790(45.49%)	54313294(82.76%)
Femur bone marrow	Infected	3	62469268	9.37G	60311646	9.05G	0.01	98.37	95.53	51.36	60311646	57300251(95.01%)	44988523(74.59%)	12311728(20.41%)	22536056(37.37%)	22452467(37.23%)	22471842(37.26%)	22516681(37.33%)	17452904(28.94%)	27535619(45.66%)	43619934(72.32%)
Femur bone marrow	Infected	4	65820160	9.87G	63349534	9.5G	0.01	98.61	96.01	51.08	63349534	61138246(96.51%)	52616087(83.06%)	8522159(13.45%)	26332426(41.57%)	26283661(41.49%)	26277161(41.48%)	26338926(41.58%)	23615326(37.28%)	29000761(45.78%)	51369610(81.09%)
Skull bone marrow	Naïve	1	67555148	10.13G	66179958	9.93G	0.01	98.58	95.95	50.52	66179958	64456453(97.4%)	55708373(84.18%)	8748080(13.22%)	27883563(42.13%)	27824810(42.04%)	27826048(42.05%)	27882325(42.13%)	24915508(37.65%)	30792865(46.53%)	54588922(82.49%)
Skull bone marrow	Naïve	2	65737376	9.86G	63476280	9.52G	0.01	98.55	95.84	50.54	63476280	61249414(96.49%)	55377006(87.24%)	5872408(9.25%)	27720258(43.67%)	27656748(43.57%)	27660869(43.58%)	27716137(43.66%)	24030857(37.86%)	31346149(49.38%)	54005170(85.08%)
Skull bone marrow	Naïve	3	67417466	10.11G	65799690	9.87G	0.01	98.61	95.99	50.58	65799690	63851202(97.04%)	56603494(86.02%)	7247708(11.01%)	28340425(43.07%)	28263069(42.95%)	28275401(42.97%)	28328093(43.05%)	25371600(38.56%)	31231894(47.47%)	55419326(84.22%)
Skull bone marrow	Naïve	4	66652580	10G	64059598	9.61G	0.01	98.55	95.84	50.63	64059598	61969115(96.74%)	55837360(87.16%)	6131755(9.57%)	27967232(43.66%)	27870128(43.51%)	27887388(43.53%)	27949972(43.63%)	24499788(38.25%)	31337572(48.92%)	54522934(85.11%)
Skull bone marrow	Infected	1	83692710	12.55G	81058276	12.16G	0.01	98.54	95.9	50.54	81058276	77351356(95.43%)	71027705(87.63%)	6323651(7.8%)	35550151(43.86%)	35477554(43.77%)	35472923(43.76%)	35554782(43.86%)	32491194(40.08%)	38536511(47.54%)	69581246(85.84%)
Skull bone marrow	Infected	2	81574682	12.24G	79207922	11.88G	0.01	98.58	95.99	50.12	79207922	73344589(92.6%)	67076272(84.68%)	6268317(7.91%)	33574209(42.39%)	33502063(42.3%)	33506322(42.3%)	33569950(42.38%)	29546509(37.3%)	37529763(47.38%)	65604422(82.83%)
Skull bone marrow	Infected	3	62877276	9.43G	61364676	9.2G	0.01	98.52	95.76	50.34	61364676	58470671(95.28%)	53888897(87.82%)	4581774(7.47%)	26978735(43.96%)	26910162(43.85%)	26915305(43.86%)	26973592(43.96%)	24399772(39.76%)	29489125(48.06%)	52788604(86.02%)
Skull bone marrow	Infected	4	64437752	9.67G	62752532	9.41G	0.01	98.49	95.73	50.12	62752532	57807834(92.12%)	52601816(83.82%)	5206018(8.3%)	26335660(41.97%)	26266156(41.86%)	26275006(41.87%)	26326810(41.95%)	23032530(36.7%)	29569286(47.12%)	51452562(81.99%)
Dura mater	Naïve	1	73324018	11G	72053850	10.81G	0.01	98.54	95.74	49.91	72053850	70329469(97.61%)	66504430(92.3%)	3825039(5.31%)	33317903(46.24%)	33186527(46.06%)	33232974(46.12%)	33271456(46.18%)	26313244(36.52%)	40191186(55.78%)	65347088(90.69%)
Dura mater	Naïve	2	63303232	9.5G	62192670	9.33G	0.01	98.54	95.83	49.61	62192670	60547394(97.35%)	55996877(90.04%)	4550517(7.32%)	28029443(45.07%)	27967434(44.97%)	27977890(44.99%)	28018987(45.05%)	20587011(33.1%)	35409866(56.94%)	54963888(88.38%)
Dura mater	Naïve	3	63169130	9.48G	61987884	9.3G	0.01	98.48	95.66	49.98	61987884	60411824(97.46%)	56235656(90.72%)	4176168(6.74%)	28161772(45.43%)	28073884(45.29%)	28096588(45.33%)	28139068(45.39%)	21780553(35.14%)	34455103(55.58%)	55203062(89.05%)
Dura mater	Naïve	4	59702900	8.96G	58671200	8.8G	0.01	98.53	95.83	49.45	58671200	57195810(97.49%)	53104859(90.51%)	4090951(6.97%)	26585432(45.31%)	26519427(45.2%)	26533320(45.22%)	26571539(45.29%)	19202021(32.73%)	33902838(57.78%)	52140196(88.87%)
Dura mater	Infected	1	61187940	9.18G	59175962	8.88G	0.01	98.54	95.82	50.55	59175962	56891324(96.14%)	53676431(90.71%)	3214893(5.43%)	26862696(45.39%)	26813735(45.31%)	26804230(45.3%)	26872201(45.41%)	23323322(39.41%)	30353109(51.29%)	52460584(88.65%)
Dura mater	Infected	2	67090588	10.06G	64491270	9.67G	0.01	98.57	95.91	50.85	64491270	62102091(96.3%)	57945138(89.85%)	4156953(6.45%)	29014363(44.99%)	28930775(44.86%)	28910607(44.83%)	29034531(45.02%)	24630423(38.19%)	33314715(51.66%)	56422402(87.49%)
Dura mater	Infected	3	63897156	9.58G	58744572	8.81G	0.01	98.5	95.73	50.37	58744572	56659811(96.45%)	53266860(90.68%)	3392951(5.78%)	26669173(45.4%)	26597687(45.28%)	26604411(45.29%)	26662449(45.39%)	22344325(38.04%)	30922535(52.64%)	52073852(88.64%)
Dura mater	Infected	4	64052638	9.61G	62598384	9.39G	0.01	98.51	95.74	49.84	62598384	60548202(96.72%)	56737043(90.64%)	3811159(6.09%)	28411969(45.39%)	28325074(45.25%)	28337092(45.27%)	28399951(45.37%)	21797199(34.82%)	34939844(55.82%)	55588108(88.8%)
Spleen	Naïve	1	71099740	10.66G	69455602	10.42G	0.01	98.48	95.72	50.02	69455602	67399756(97.04%)	64744744(93.22%)	2655012(3.82%)	32419037(46.68%)	32325707(46.54%)	32330945(46.55%)	32413799(46.67%)	25222333(36.31%)	39522411(56.9%)	63333584(91.19%)
Spleen	Naïve	2	67858296	10.18G	65864360	9.88G	0.01	98.54	95.85	50.44	65864360	63691341(96.7%)	60712435(92.18%)	2978906(4.52%)	30393476(46.15%)	30318959(46.03%)	30317472(46.03%)	30394963(46.15%)	26513226(40.25%)	34199209(51.92%)	59307408(90.04%)
Spleen	Naïve	3	70142868	10.52G	67397386	10.11G	0.01	98.44	95.57	50.17	67397386	64875759(96.26%)	62213126(92.31%)	2662633(3.95%)	31149261(46.22%)	31063865(46.09%)	31070171(46.1%)	31142955(46.21%)	25021077(37.12%)	37192049(55.18%)	60583394(89.89%)
Spleen	Naïve	4	65884916	9.88G	64459426	9.67G	0.01	98.53	95.82	50.08	64459426	62583960(97.09%)	60013205(93.1%)	2570755(3.99%)	30055479(46.63%)	29957726(46.48%)	29971409(46.5%)	30041796(46.61%)	24352811(37.78%)	35660394(55.32%)	58774964(91.18%)
Spleen	Infected	1	59703854	8.96G	56246344	8.44G	0.01	98.56	95.87	51.16	56246344	54107271(96.2%)	48097503(85.51%)	6009768(10.68%)	24065541(42.79%)	24031962(42.73%)	24006742(42.68%)	24090761(42.83%)	23657882(42.06%)	24439621(43.45%)	46745772(83.11%)
Spleen	Infected	2	63947706	9.59G	61047876	9.16G	0.01	98.52	95.78	51.23	61047876	58665888(96.1%)	51667215(84.63%)	6998673(11.46%)	25863546(42.37%)	25803669(42.27%)	25783094(42.23%)	25884121(42.4%)	25475293(41.73%)	26191922(42.9%)	50224270(82.27%)
Spleen	Infected	3	65015504	9.75G	62804614	9.42G	0.01	98.54	95.83	50.67	62804614	60515910(96.36%)	55438405(88.27%)	5077505(8.08%)	27756818(44.2%)	27681587(44.08%)	27648182(44.02%)	27790223(44.25%)	27218967(43.34%)	28219438(44.93%)	53907082(85.83%)
Spleen	Infected	4	65215404	9.78G	62781824	9.42G	0.01	98.61	95.99	50.99	62781824	60562783(96.47%)	54444683(86.72%)	6118100(9.75%)	27260667(43.42%)	27184016(43.3%)	27168282(43.27%)	27276401(43.45%)	26845453(42.76%)	27599230(43.96%)	52987516(84.4%)

## Sheet: Supplementary table 2
Supplementary table 2 - Differential expression analysis (DEG) of pairwise comparisons between naïve and infected tissues
Tissue	Comparison	All DEG	Eniched in naïve	Enriched in Infected	threshold
Skull bone marrow (skBM)	Naive_skBM vs Treated_skBM	2126	552	1574	DESeq2 padj<=0.05 |log2FoldChange|>=1.0
Dura mater	Naive_dura mater vs Treated_dura mater	6236	3201	3035	DESeq2 padj<=0.05 |log2FoldChange|>=1.0
Femur bone marrow (fBM)	Naive_fBM vs Treated_fBM	805	487	318	DESeq2 padj<=0.05 |log2FoldChange|>=1.0
Spleen	Naive_Spleen vs Treated_Sp	8640	4863	3777	DESeq2 padj<=0.05 |log2FoldChange|>=1.0

## Sheet: Supplementary table 3
Supplementary table 3 - List of differentially expressed genes in pairwise comparisons across tissues between naïve (n = 4) and infected (n = 4) samples.
Nomenclature: N = naïve; I = Infected.
Tissue: Skull bone marrow (skBM)																Tissue: Dura mater/Meninges (Men)																Tissue: Femur bone marrow (fBM)																Tissue: Spleen (Sp)
gene_name	gene_description	log2FoldChange	Naive_skBM	Treated_skBM	pvalue	padj	skBM_N1	skBM_N2	skBM_N3	skBM_N4	skBM_I1	skBM_I2	skBM_I3	skBM_I4		gene_name	gene_description	Naive_Men	Treated_Men	log2FoldChange	pvalue	padj	Men_N1	Men_N2	Men_N3	Men_N4	Men_I1	Men_I2	Men_I3	Men_I4		gene_name	gene_description	Naive_fBM	Treated_fBM	log2FoldChange	pvalue	padj	fBM_N1	fBM_N2	fBM_N3	fBM_N4	fBM_I1	fBM_I2	fBM_I3	fBM_I4		gene_name	gene_description
Fcmr	Fc fragment of IgM receptor [Source:MGI Symbol;Acc:MGI:1916419]	4.77945	1000.15	36.5754	2.62369e-117	5.80387e-113	1066.61	1094.79	706.098	1133.09	38.4646	29.1031	37.7167	41.0172		C3	complement component 3 [Source:MGI Symbol;Acc:MGI:88227]	1301.94	51645.1	-5.31029	0	0	1110.15	1526.79	1350.39	1220.42	53203.1	58169.1	46326.9	48881.3		Fcmr	Fc fragment of IgM receptor [Source:MGI Symbol;Acc:MGI:1916419]	1090.06	17.6338	5.93886	1.98615e-84	3.82195e-80	1112.09	1410.44	849.768	987.923	24.0102	20.1067	17.5683	8.84979		Apol11b	apolipoprotein L 11b [Source:MGI Symbol;Acc:MGI:3036248]
Ms4a1	membrane-spanning 4-domains, subfamily A, member 1 [Source:MGI Symbol;Acc:MGI:88321]	3.90346	2289.88	153.017	2.50085e-115	2.76606e-111	2730.23	2371.02	1606.11	2452.16	152.256	157.499	127.159	175.155		Cxcl9	chemokine (C-X-C motif) ligand 9 [Source:MGI Symbol;Acc:MGI:1352449]	131.747	34428.2	-8.02407	0	0	163.804	121.925	123.686	117.572	38728.1	37972.6	31643.7	29368.6		Iigp1	interferon inducible GTPase 1 [Source:MGI Symbol;Acc:MGI:1926259]	174.719	3834.41	-4.45621	5.58286e-79	5.37155e-75	167.751	211.911	175.164	144.051	3481.47	5189.36	2699.14	3967.66		Btg1	BTG anti-proliferation factor 1 [Source:MGI Symbol;Acc:MGI:88215]
Spib	Spi-B transcription factor (Spi-1/PU.1 related) [Source:MGI Symbol;Acc:MGI:892986]	3.58094	6398.67	534.71	8.36759e-92	6.16998e-88	6757.67	7298.61	4157.54	7380.87	615.434	444.25	483.851	595.304		Ccl5	chemokine (C-C motif) ligand 5 [Source:MGI Symbol;Acc:MGI:98262]	196.46	20535.2	-6.70978	0	0	166.782	169.239	240.911	208.909	26344.1	18977	17121.7	19697.8		Spib	Spi-B transcription factor (Spi-1/PU.1 related) [Source:MGI Symbol;Acc:MGI:892986]	4672.42	453.949	3.36019	1.85441e-75	1.18948e-71	4421.12	5567.85	4318.91	4381.8	523.078	416.758	357.755	518.204		Iigp1	interferon inducible GTPase 1 [Source:MGI Symbol;Acc:MGI:1926259]
Cd79a	CD79A antigen (immunoglobulin-associated alpha) [Source:MGI Symbol;Acc:MGI:101774]	3.16139	4889.95	546.216	6.11492e-79	3.3817e-75	5373.07	5517.25	3272.29	5397.19	662.714	488.761	533.422	499.967		Gbp8	guanylate-binding protein 8 [Source:MGI Symbol;Acc:MGI:1923324]	248.685	4847.1	-4.28734	1.50074e-258	9.57695e-255	224.858	214.733	251.987	303.161	4771.97	4548.88	5049.18	5018.37		Gm12185	predicted gene 12185 [Source:MGI Symbol;Acc:MGI:3652173]	25.0451	666.336	-4.73454	2.44665e-69	1.17702e-65	27.2488	33.5116	17.9655	21.4544	509.358	833.515	693.151	629.318		Add3	adducin 3 (gamma) [Source:MGI Symbol;Acc:MGI:1351615]
Ighd	immunoglobulin heavy constant delta [Source:MGI Symbol;Acc:MGI:96447]	3.5479	1839.69	157.719	1.15377e-78	5.10453e-75	1982.66	2132.88	1178.23	2064.98	142.64	135.244	176.73	176.263		Ctss	cathepsin S [Source:MGI Symbol;Acc:MGI:107341]	3316.97	49522.4	-3.90028	1.13385e-246	5.78853e-243	2903.8	3631.36	3705.97	3026.75	54598	51657.8	45040	46794		Ms4a1	membrane-spanning 4-domains, subfamily A, member 1 [Source:MGI Symbol;Acc:MGI:88321]	1284.15	52.8937	4.58175	1.11386e-67	4.28681e-64	1004.8	1705.15	1270.16	1156.49	72.0305	57.5783	36.7338	45.2323		Ighd	immunoglobulin heavy constant delta [Source:MGI Symbol;Acc:MGI:96447]
Pax5	paired box 5 [Source:MGI Symbol;Acc:MGI:97489]	3.50118	4363.29	385.211	5.81561e-77	2.14412e-73	4584.43	5037.9	2553.54	5277.27	427.919	366.357	368.546	378.024		Fcgr4	Fc receptor, IgG, low affinity IV [Source:MGI Symbol;Acc:MGI:2179523]	141.823	8350.47	-5.88346	9.49338e-243	4.0388e-239	103.494	141.942	179.991	141.864	10574.9	8231.56	7285.32	7310.12		Fcer2a	Fc receptor, IgE, low affinity II, alpha polypeptide [Source:MGI Symbol;Acc:MGI:95497]	497.302	2.4666	7.48802	6.01455e-47	1.92897e-43	558.601	621.936	353.022	455.65	6.00254	0.913942	0	2.94993		Tgfbr2	transforming growth factor, beta receptor II [Source:MGI Symbol;Acc:MGI:98729]
Cd19	CD19 antigen [Source:MGI Symbol;Acc:MGI:88319]	3.60722	4906.32	402.262	1.44292e-74	4.55984e-71	4910.84	5866.72	2885.52	5962.21	489.623	387.756	346.994	384.675		Il12rb1	interleukin 12 receptor, beta 1 [Source:MGI Symbol;Acc:MGI:104579]	58.8429	2343.13	-5.32478	4.11957e-232	1.50223e-228	45.4184	67.3317	51.6897	70.9319	2655.12	2287.1	2301.08	2129.2		Zbp1	Z-DNA binding protein 1 [Source:MGI Symbol;Acc:MGI:1927449]	426.207	2097.56	-2.29927	5.65424e-46	1.55435e-42	410.435	487.889	406.02	400.482	1718.44	2365.28	2071.47	2235.06		Ripor2	RHO family interacting cell polarization regulator 2 [Source:MGI Symbol;Acc:MGI:2444879]
Fcrla	Fc receptor-like A [Source:MGI Symbol;Acc:MGI:2138647]	3.13656	1831.52	208.424	4.28623e-74	1.1852e-70	1945.8	2101.96	1250.95	2027.38	220.37	175.475	232.766	205.086		Klra2	killer cell lectin-like receptor, subfamily A, member 2 [Source:MGI Symbol;Acc:MGI:101906]	193.375	3193.78	-4.04729	2.81786e-228	8.99109e-225	179.44	204.725	190.144	199.192	3306.91	2889.14	2926.68	3652.37		Gm4841	predicted gene 4841 [Source:MGI Symbol;Acc:MGI:3643814]	20.2868	1453.48	-6.16122	4.35499e-45	1.04754e-41	24.6942	22.6696	14.3724	19.4111	761.465	995.283	2996.2	1060.99		C4b	complement component 4B (Chido blood group) [Source:MGI Symbol;Acc:MGI:88228]
Cd79b	CD79B antigen [Source:MGI Symbol;Acc:MGI:96431]	2.8459	4188.81	582.98	2.60205e-70	6.39555e-67	4701.31	4457.51	2904.48	4691.93	601.01	477.633	597.002	656.276		Cd52	CD52 antigen [Source:MGI Symbol;Acc:MGI:1346088]	557.457	6737.23	-3.59662	8.37129e-217	2.37428e-213	493.646	546.842	534.435	654.905	7162.63	7077.01	6259.25	6450.04		Ccr7	chemokine (C-C motif) receptor 7 [Source:MGI Symbol;Acc:MGI:103011]	333.77	35.8243	3.23411	8.8443e-45	1.89101e-41	336.353	392.283	285.651	320.794	30.0127	31.074	39.928	42.2823		H2-Ob	histocompatibility 2, O region beta locus [Source:MGI Symbol;Acc:MGI:95925]
Fcer2a	Fc receptor, IgE, low affinity II, alpha polypeptide [Source:MGI Symbol;Acc:MGI:95497]	5.03211	656.798	19.9363	6.00118e-67	1.32752e-63	675.977	782.436	401.527	767.252	28.8485	12.8396	25.8629	12.1943		Ly6i	lymphocyte antigen 6 complex, locus I [Source:MGI Symbol;Acc:MGI:1888480]	16.5048	4195.85	-7.94942	1.80492e-211	4.60724e-208	30.5271	8.18899	16.6146	10.6884	4636.23	3331.59	4249.32	4566.27		Ccl8	chemokine (C-C motif) ligand 8 [Source:MGI Symbol;Acc:MGI:101878]	16.0648	306.661	-4.24883	1.73271e-44	3.33426e-41	15.3275	22.6696	17.0672	9.19473	303.557	233.969	383.309	305.809		Cr2	complement receptor 2 [Source:MGI Symbol;Acc:MGI:88489]
Niban3	niban apoptosis regulator 3 [Source:MGI Symbol;Acc:MGI:3686743]	3.6532	3283.83	260.992	6.90302e-67	1.3882e-63	3118.76	3831.77	2048.74	4136.05	325.347	190.882	229.533	298.206		Slfn2	schlafen 2 [Source:MGI Symbol;Acc:MGI:1313258]	896.271	6927.52	-2.95062	3.50956e-207	8.14408e-204	846.57	896.239	995.951	846.324	7260.93	7026.38	6419.44	7003.33		Cd209a	CD209a antigen [Source:MGI Symbol;Acc:MGI:2157942]	344.086	12.9996	4.73616	3.34849e-43	5.85773e-40	383.187	444.521	267.686	280.95	9.43256	9.13942	12.777	20.6495		Rasal3	RAS protein activator like 3 [Source:MGI Symbol;Acc:MGI:2444128]
Vpreb3	pre-B lymphocyte gene 3 [Source:MGI Symbol;Acc:MGI:98938]	3.252	1382.91	144.896	1.0385e-66	1.9144e-63	1303.52	1565.9	930.573	1731.65	167.481	142.092	132.547	137.463		Lgals3	lectin, galactose binding, soluble 3 [Source:MGI Symbol;Acc:MGI:96778]	676.641	9286.95	-3.77873	5.89677e-204	1.25434e-200	649.26	741.558	717.195	598.549	10336.1	9238.64	7705.27	9867.75		Apol11a	apolipoprotein L 11a [Source:MGI Symbol;Acc:MGI:3649094]	611.111	11110.6	-4.18453	6.75185e-43	1.08271e-39	636.09	997.462	336.853	474.04	9617.78	12602.3	10767.8	11454.6		Pxk	PX domain containing serine/threonine kinase [Source:MGI Symbol;Acc:MGI:1289230]
Chst3	carbohydrate sulfotransferase 3 [Source:MGI Symbol;Acc:MGI:1858224]	3.57334	3117.18	261.75	6.05848e-62	1.03092e-58	3294.6	3830.74	1708.33	3635.05	314.128	225.977	221.99	284.904		Hk3	hexokinase 3 [Source:MGI Symbol;Acc:MGI:2670962]	681.105	12226.2	-4.16722	1.201e-200	2.35821e-197	552.467	665.128	668.275	838.551	13914.5	12470.1	11260.8	11259.6		Gm12250	predicted gene 12250 [Source:MGI Symbol;Acc:MGI:3649299]	202.506	1700.47	-3.07058	1.46342e-42	2.1662e-39	199.257	246.409	188.638	175.722	1379.73	2250.12	1347.97	1824.04		Fcmr	Fc fragment of IgM receptor [Source:MGI Symbol;Acc:MGI:1916419]
Ppbp	pro-platelet basic protein [Source:MGI Symbol;Acc:MGI:1888712]	1.96525	6613.99	1693.14	1.05193e-56	1.66213e-53	5770.03	7456.33	6011.31	7218.27	1926.44	1681.13	1736.05	1428.95		F10	coagulation factor X [Source:MGI Symbol;Acc:MGI:103107]	40.3312	2324.94	-5.85115	2.22847e-200	4.06314e-197	34.9945	49.1339	47.0746	30.1218	2655.12	1922.79	2077.04	2644.82		Blk	B lymphoid kinase [Source:MGI Symbol;Acc:MGI:88169]	961.284	95.1634	3.3307	1.20525e-40	1.65661e-37	882.181	1045.76	918.037	999.161	132.913	58.4923	83.0503	106.197		S1pr1	sphingosine-1-phosphate receptor 1 [Source:MGI Symbol;Acc:MGI:1096355]
Blk	B lymphoid kinase [Source:MGI Symbol;Acc:MGI:88169]	3.502	1401.35	123.691	5.70245e-50	8.4096e-47	1484.62	1697.85	774.6	1648.32	149.05	95.8691	101.296	148.549		Serpina3f	serine (or cysteine) peptidase inhibitor, clade A, member 3F [Source:MGI Symbol;Acc:MGI:2182838]	65.4478	7155.49	-6.77546	5.10559e-197	8.68835e-194	46.9075	80.0701	96.9183	37.8951	8036.75	6243.84	6292.8	8048.56		Serpina3f	serine (or cysteine) peptidase inhibitor, clade A, member 3F [Source:MGI Symbol;Acc:MGI:2182838]	142.638	2327.19	-4.02915	3.69144e-40	4.73563e-37	116.659	182.342	142.826	128.726	1703.01	3632.92	1482.13	2490.72		Satb1	special AT-rich sequence binding protein 1 [Source:MGI Symbol;Acc:MGI:105084]
Rag1	recombination activating 1 [Source:MGI Symbol;Acc:MGI:97848]	3.2262	3265.27	348.654	7.64762e-50	1.05733e-46	3452.54	3993.62	1743.11	3871.83	435.933	320.99	299.578	338.115		Pilra	paired immunoglobin-like type 2 receptor alpha [Source:MGI Symbol;Acc:MGI:2450529]	134.946	2486.97	-4.20804	7.44014e-194	1.18698e-190	109.451	134.663	160.607	135.062	2803.74	2451.09	2320.57	2372.48		Tnfrsf13c	tumor necrosis factor receptor superfamily, member 13c [Source:MGI Symbol;Acc:MGI:1919299]	639.553	91.8129	2.7912	4.56637e-40	5.49192e-37	556.898	823.005	629.691	548.619	102.901	92.3081	76.6618	95.3811		Serpina3f	serine (or cysteine) peptidase inhibitor, clade A, member 3F [Source:MGI Symbol;Acc:MGI:2182838]
Tnfrsf13c	tumor necrosis factor receptor superfamily, member 13c [Source:MGI Symbol;Acc:MGI:1919299]	3.03626	919.271	112.274	1.66953e-48	2.17246e-45	1103.46	1000.98	555.393	1017.24	102.572	106.997	113.15	126.377		Pirb	paired Ig-like receptor B [Source:MGI Symbol;Acc:MGI:894311]	746.279	10022.9	-3.74813	3.2674e-192	4.9061e-189	705.102	630.552	727.349	922.115	10837	10092.7	9323.39	9838.68		Gvin2	GTPase, very large interferon inducible, family member 2 [Source:MGI Symbol;Acc:MGI:3782245]	93.933	487.364	-2.37948	1.40933e-39	1.59527e-36	84.3011	103.492	97.0137	90.9257	534.226	538.312	408.863	468.056		Bank1	B cell scaffold protein with ankyrin repeats 1 [Source:MGI Symbol;Acc:MGI:2442120]
Ly6d	lymphocyte antigen 6 complex, locus D [Source:MGI Symbol;Acc:MGI:96881]	2.64589	1998.32	318.649	2.95687e-47	3.63383e-44	2373.29	1907.12	1552.36	2160.5	383.044	345.813	336.217	209.52		Gbp5	guanylate binding protein 5 [Source:MGI Symbol;Acc:MGI:2429943]	1251.63	17450.9	-3.80126	9.72156e-192	1.37863e-188	1300.75	1057.29	1480.54	1167.95	19413.2	15205.1	18273.4	16912		Cd72	CD72 antigen [Source:MGI Symbol;Acc:MGI:88345]	1596.94	270.465	2.55628	2.8394e-39	3.03547e-36	1502.09	1840.18	1473.17	1572.3	303.557	243.109	202.834	332.359		Il7r	interleukin 7 receptor [Source:MGI Symbol;Acc:MGI:96562]
Bach2	BTB and CNC homology, basic leucine zipper transcription factor 2 [Source:MGI Symbol;Acc:MGI:894679]	3.22635	2720.49	290.795	3.94883e-46	4.59748e-43	2783.93	3337.98	1422.73	3337.29	329.353	218.273	298.501	317.052		Ccr5	chemokine (C-C motif) receptor 5 [Source:MGI Symbol;Acc:MGI:107182]	544.82	9485.21	-4.12325	3.90379e-187	5.24464e-184	428.124	579.598	558.434	613.124	11197.4	9645.87	8357.93	8739.64		Saa3	serum amyloid A 3 [Source:MGI Symbol;Acc:MGI:98223]	4.66934	397.518	-6.40786	8.73347e-39	8.84517e-36	4.25763	7.88508	4.49137	2.04327	203.229	368.319	646.834	371.691		Scml4	Scm polycomb group protein like 4 [Source:MGI Symbol;Acc:MGI:2446140]
Cd22	CD22 antigen [Source:MGI Symbol;Acc:MGI:88322]	2.47152	1759.09	317.259	8.36156e-46	9.24831e-43	1856.31	2041.14	1131.86	2007.05	319.737	303.015	309.277	337.007		Lyz2	lysozyme 2 [Source:MGI Symbol;Acc:MGI:96897]	11671.4	126350	-3.43642	4.73617e-185	6.04478e-182	10353.2	11902.2	13527.9	10902.1	140722	127748	108745	128186		Gbp2	guanylate binding protein 2 [Source:MGI Symbol;Acc:MGI:102772]	412.648	5880.88	-3.83313	5.85072e-38	5.62927e-35	459.824	487.889	342.243	360.638	3830.48	9018.78	4010.37	6663.89		Sidt1	SID1 transmembrane family, member 1 [Source:MGI Symbol;Acc:MGI:2443155]
4930426D05Rik	RIKEN cDNA 4930426D05 gene [Source:MGI Symbol;Acc:MGI:1921894]	3.95309	380.665	24.4641	1.26894e-45	1.33668e-42	376.947	453.586	229.745	462.384	21.6364	32.527	22.63	21.0629		Samhd1	SAM domain and HD domain, 1 [Source:MGI Symbol;Acc:MGI:1927468]	4744.69	37008.1	-2.9636	1.50063e-183	1.82405e-180	4209.77	4695.93	5333.27	4739.81	39714.5	38647.3	35691.7	33979		Col5a3	collagen, type V, alpha 3 [Source:MGI Symbol;Acc:MGI:1858212]	346.818	37.8933	3.18413	1.65923e-37	1.5204e-34	278.449	453.392	300.922	354.508	41.1603	36.5577	33.5395	40.3157		Snn	stannin [Source:MGI Symbol;Acc:MGI:1276549]
H2-Ob	histocompatibility 2, O region beta locus [Source:MGI Symbol;Acc:MGI:95925]	2.78896	1671.26	241.993	1.83983e-45	1.84995e-42	1732.06	1915.37	1026.48	2011.12	237.199	226.833	209.058	294.881		Acod1	aconitate decarboxylase 1 [Source:MGI Symbol;Acc:MGI:103206]	121.703	7202.59	-5.88813	2.02994e-181	2.35529e-178	119.875	134.663	72.9195	159.354	9295.86	6952.64	6266.83	6295.04		Gbp4	guanylate binding protein 4 [Source:MGI Symbol;Acc:MGI:97072]	165.721	1099.61	-2.73009	5.69621e-37	4.98237e-34	194.148	169.529	157.198	142.008	974.126	1459.57	875.222	1089.51		B3gnt5	UDP-GlcNAc:betaGal beta-1,3-N-acetylglucosaminyltransferase 5 [Source:MGI Symbol;Acc:MGI:2137302]
Acod1	aconitate decarboxylase 1 [Source:MGI Symbol;Acc:MGI:103206]	-3.489	143.768	1613.85	4.09869e-45	3.94205e-42	141.092	122.674	208.668	102.639	1064.99	1909.68	1241.42	2239.32		Slamf8	SLAM family member 8 [Source:MGI Symbol;Acc:MGI:1921998]	147.337	4233.09	-4.8468	4.60329e-178	5.10885e-175	125.831	121.015	193.837	148.665	5035.26	4347.46	4044.75	3504.9		Cd19	CD19 antigen [Source:MGI Symbol;Acc:MGI:88319]	3083.25	305.733	3.33219	3.76209e-36	3.14756e-33	3003.33	3998.72	2521.46	2809.5	411.603	194.67	258.734	357.925		Cxcr5	chemokine (C-X-C motif) receptor 5 [Source:MGI Symbol;Acc:MGI:103567]
Pdcd1	programmed cell death 1 [Source:MGI Symbol;Acc:MGI:104879]	-3.26204	41.7288	401.111	1.54097e-44	1.42032e-41	30.5348	51.5439	42.1551	42.6816	332.559	325.27	505.404	441.212		Fgr	FGR proto-oncogene, Src family tyrosine kinase [Source:MGI Symbol;Acc:MGI:95527]	389.611	3596.92	-3.20817	1.50316e-176	1.59874e-173	341.01	414.909	407.057	395.47	3760.94	3895.11	3466.78	3264.85		Snn	stannin [Source:MGI Symbol;Acc:MGI:1276549]	1814.55	287.03	2.65366	4.96258e-36	3.97895e-33	1584.69	1814.55	1999.56	1859.38	358.437	292.461	188.46	308.759		Ier5	immediate early response 5 [Source:MGI Symbol;Acc:MGI:1337072]
Myl4	myosin, light polypeptide 4 [Source:MGI Symbol;Acc:MGI:97267]	3.05701	612.617	73.7596	7.16602e-44	6.34078e-41	536.991	727.799	419.443	766.236	79.3333	58.2062	74.3558	83.1431		Ms4a6d	membrane-spanning 4-domains, subfamily A, member 6D [Source:MGI Symbol;Acc:MGI:1916024]	282.336	5206.72	-4.20517	3.10696e-175	3.17233e-172	282.19	290.254	237.219	319.679	6376.28	4661.14	4390.02	5399.44		Bach2	BTB and CNC homology, basic leucine zipper transcription factor 2 [Source:MGI Symbol;Acc:MGI:894679]	1377.24	217.049	2.6689	5.22591e-36	4.02249e-33	1305.39	1535.62	1283.63	1384.32	273.544	157.198	255.539	181.912		Dgka	diacylglycerol kinase, alpha [Source:MGI Symbol;Acc:MGI:102952]
Gvin3	GTPase, very large interferon inducible, family member 3 [Source:MGI Symbol;Acc:MGI:3584360]	-1.00061	3903.72	7811.37	6.03459e-43	5.13427e-40	3975.84	3945.17	3698.05	3995.81	7398.03	7991.37	7906.5	7949.58		Apol6	apolipoprotein L 6 [Source:MGI Symbol;Acc:MGI:1919189]	36.6831	1881.88	-5.66609	5.40169e-173	5.30321e-170	52.1195	21.8373	38.7673	34.0084	2093.44	1675.15	1970.97	1787.97		Cpm	carboxypeptidase M [Source:MGI Symbol;Acc:MGI:1917824]	422.769	41.9017	3.36018	2.61568e-34	1.9359e-31	351.68	408.053	553.337	378.006	34.3002	45.6971	59.0935	28.516		Kmo	kynurenine 3-monooxygenase (kynurenine 3-hydroxylase) [Source:MGI Symbol;Acc:MGI:2138151]
Igha	immunoglobulin heavy constant alpha [Source:MGI Symbol;Acc:MGI:96444]	2.41817	34402.6	6436.88	1.43779e-39	1.17797e-36	29375.5	42694.8	23165.3	42374.7	6239.29	5279.65	7910.81	6317.76		Pla2g7	phospholipase A2, group VII (platelet-activating factor acetylhydrolase, plasma) [Source:MGI Symbol;Acc:MGI:1351327]	800.337	12410.1	-3.95487	6.97429e-172	6.59354e-169	762.434	906.248	749.501	783.166	15401.8	10736.6	10471.8	13030.3		Apol10a	apolipoprotein L 10A [Source:MGI Symbol;Acc:MGI:3036238]	17.3214	1028.33	-5.90054	3.3528e-34	2.38955e-31	8.51526	43.3679	7.1862	10.2164	748.602	1368.17	886.402	1110.16		Arhgef18	rho/rac guanine nucleotide exchange factor (GEF) 18 [Source:MGI Symbol;Acc:MGI:2142567]
Aff3	AF4/FMR2 family, member 3 [Source:MGI Symbol;Acc:MGI:106927]	2.04006	1358.74	330.509	1.04204e-38	8.23247e-36	1509.89	1427.76	979.052	1518.25	352.593	289.319	327.597	352.527		Myo1f	myosin IF [Source:MGI Symbol;Acc:MGI:107711]	1258.46	8316.36	-2.72454	4.82121e-167	4.39522e-164	1196.51	1290.22	1265.48	1281.63	8730.67	9206.72	7796.19	7531.87		Gbp3	guanylate binding protein 3 [Source:MGI Symbol;Acc:MGI:1926263]	582.227	2820.89	-2.2767	1.10733e-33	7.61011e-31	586.701	605.18	543.456	593.571	2108.61	3534.21	2628.86	3011.88		Sbk1	SH3-binding kinase 1 [Source:MGI Symbol;Acc:MGI:2135937]
Cd209a	CD209a antigen [Source:MGI Symbol;Acc:MGI:2157942]	4.05772	407.674	24.1171	1.25429e-38	9.56761e-36	504.351	417.505	299.301	409.54	44.8754	14.5516	22.63	14.4115		Clec4e	C-type lectin domain family 4, member e [Source:MGI Symbol;Acc:MGI:1861232]	161.132	5304.59	-5.03981	1.95107e-166	1.71734e-163	179.44	163.78	127.378	173.929	6311.92	4373.88	4062.07	6470.5		Irgm2	immunity-related GTPase family M member 2 [Source:MGI Symbol;Acc:MGI:1926262]	788.523	3303.62	-2.06725	1.53988e-33	1.02179e-30	794.474	750.068	837.192	772.358	3339.13	4139.24	2667.19	3068.91		Gm4951	predicted gene 4951 [Source:MGI Symbol;Acc:MGI:3644953]
Thbs1	thrombospondin 1 [Source:MGI Symbol;Acc:MGI:98737]	1.44017	5228.44	1926.85	2.61106e-38	1.92531e-35	5314.11	5668.79	4302.98	5627.87	1916.82	1912.25	2103.51	1774.83		Batf2	basic leucine zipper transcription factor, ATF-like 2 [Source:MGI Symbol;Acc:MGI:1921731]	77.3651	2216.62	-4.83743	2.19867e-166	1.87078e-163	90.8368	50.0438	83.0728	85.5069	2545.13	2007.54	2258.87	2054.93		Igtp	interferon gamma induced GTPase [Source:MGI Symbol;Acc:MGI:107729]	1523.82	8287.86	-2.44317	2.3544e-33	1.51019e-30	1723.49	1602.64	1298.01	1471.16	5843.9	9946.43	9240.94	8120.17		Fam102a	family with sequence similarity 102, member A [Source:MGI Symbol;Acc:MGI:2138935]
Gbp10	guanylate-binding protein 10 [Source:MGI Symbol;Acc:MGI:4359647]	-5.25307	11.2218	427.014	3.11483e-37	2.22269e-34	12.6351	10.3088	16.862	5.08114	245.212	600.038	219.835	642.973		Tap1	transporter 1, ATP-binding cassette, sub-family B (MDR/TAP) [Source:MGI Symbol;Acc:MGI:98483]	2023.16	19051.4	-3.23555	2.06519e-165	1.70052e-162	1740.05	1900.76	2422.03	2029.82	20218.3	19792.5	18637	17557.9		C4b	complement component 4B (Chido blood group) [Source:MGI Symbol;Acc:MGI:88228]	516.258	2487.87	-2.26948	6.36733e-33	3.95247e-30	499.846	631.792	449.137	484.256	2362.43	3117.46	2089.03	2382.56		Ifi208	interferon activated gene 208 [Source:MGI Symbol;Acc:MGI:2442822]
Ccl7	chemokine (C-C motif) ligand 7 [Source:MGI Symbol;Acc:MGI:99512]	-5.29314	7.82931	306.324	3.04837e-35	2.10728e-32	11.5822	6.18526	9.48489	4.06491	157.865	358.653	217.679	491.098		Gbp6	guanylate binding protein 6 [Source:MGI Symbol;Acc:MGI:2140937]	565.943	5179.14	-3.19438	9.06272e-165	7.22922e-162	528.641	558.671	649.814	526.645	5406.2	4652.34	5745.13	4912.88		Foxo1	forkhead box O1 [Source:MGI Symbol;Acc:MGI:1890077]	851.074	260.722	1.70188	9.64097e-32	5.79753e-29	772.334	894.956	891.089	845.915	295.839	259.559	234.777	252.711		Foxp1	forkhead box P1 [Source:MGI Symbol;Acc:MGI:1914004]
Igkv8-34	immunoglobulin kappa variable 8-34 [Source:MGI Symbol;Acc:MGI:4949914]	-6.19513	3.85854	284.595	2.69161e-34	1.80428e-31	4.2117	3.09263	0	8.12983	327.751	166.059	446.135	198.435		AB124611	cDNA sequence AB124611 [Source:MGI Symbol;Acc:MGI:3043001]	256.76	3471.35	-3.75961	1.34822e-164	1.04287e-161	207.733	297.533	239.988	281.784	3829.98	3507.69	3102.02	3445.69		Niban3	niban apoptosis regulator 3 [Source:MGI Symbol;Acc:MGI:3686743]	2065.95	221.576	3.2281	3.13668e-31	1.82906e-28	1747.33	2594.19	1895.36	2026.93	182.649	134.349	327.41	241.894		Gimap3	GTPase, IMAP family member 3 [Source:MGI Symbol;Acc:MGI:1932723]
Cacna1e	calcium channel, voltage-dependent, R type, alpha 1E subunit [Source:MGI Symbol;Acc:MGI:106217]	2.56073	1001.53	169.304	4.42113e-34	2.87646e-31	1009.75	1150.46	666.05	1179.84	229.185	155.787	130.392	161.852		Slfn1	schlafen 1 [Source:MGI Symbol;Acc:MGI:1313259]	215.968	2815.63	-3.70854	2.438e-162	1.83036e-159	173.483	215.643	210.451	264.294	2691.4	3023.41	2712.38	2835.35		H2-Ob	histocompatibility 2, O region beta locus [Source:MGI Symbol;Acc:MGI:95925]	1177.36	168.835	2.79369	5.48616e-31	3.10501e-28	1136.79	1561.25	938.697	1072.72	207.516	183.702	114.993	169.129		Pecam1	platelet/endothelial cell adhesion molecule 1 [Source:MGI Symbol;Acc:MGI:97537]
Igkv17-127	immunoglobulin kappa variable 17-127 [Source:MGI Symbol;Acc:MGI:3646891]	-2.30079	202.55	998.122	6.81091e-34	4.30469e-31	187.421	168.033	269.793	184.954	1030.53	750.689	1246.81	964.459		AW112010	expressed sequence AW112010 [Source:MGI Symbol;Acc:MGI:2147706]	360.076	11486.5	-4.99621	2.62962e-162	1.91782e-159	343.989	281.155	351.675	463.487	13166.8	9401.53	9140.47	14237		Cacna1i	calcium channel, voltage-dependent, alpha 1I subunit [Source:MGI Symbol;Acc:MGI:2178051]	161.832	8.20924	4.21356	3.48293e-30	1.91491e-27	160.938	162.63	164.384	159.375	16.2926	5.48365	3.19424	7.86648		Gimap8	GTPase, IMAP family member 8 [Source:MGI Symbol;Acc:MGI:2685303]
Cecr2	CECR2, histone acetyl-lysine reader [Source:MGI Symbol;Acc:MGI:1923799]	2.22285	2663.87	570.443	5.44235e-33	3.34417e-30	2627.05	3227.68	1624.02	3176.73	641.879	552.959	560.362	526.573		Fcgr3	Fc receptor, IgG, low affinity III [Source:MGI Symbol;Acc:MGI:95500]	714.295	6419.38	-3.16668	2.21246e-161	1.56876e-158	823.488	644.2	737.502	651.99	7063.17	6166.79	5839.3	6608.28		Cxcr5	chemokine (C-X-C motif) receptor 5 [Source:MGI Symbol;Acc:MGI:103567]	277.585	27.9189	3.26641	8.08952e-30	4.32408e-27	289.519	286.82	225.467	308.534	34.3002	34.7298	11.1798	31.4659		Lgals9	lectin, galactose binding, soluble 9 [Source:MGI Symbol;Acc:MGI:109496]
Klhl14	kelch-like 14 [Source:MGI Symbol;Acc:MGI:1921249]	4.33496	276.583	13.5765	8.9631e-33	5.35872e-30	292.713	341.22	138.058	334.339	21.6364	8.55974	9.69858	14.4115		Casp4	caspase 4, apoptosis-related cysteine peptidase [Source:MGI Symbol;Acc:MGI:107700]	216.453	1801.82	-3.05601	2.28227e-161	1.57452e-158	224.858	227.472	211.374	202.107	1843.02	1752.19	1686.31	1925.76		Cr2	complement receptor 2 [Source:MGI Symbol;Acc:MGI:88489]	183.871	5.01235	5.22815	1.06224e-29	5.52453e-27	137.947	254.294	126.657	216.587	6.00254	2.74183	6.38849	4.91655		Sell	selectin, lymphocyte [Source:MGI Symbol;Acc:MGI:98279]
Nlrc5	NLR family, CARD domain containing 5 [Source:MGI Symbol;Acc:MGI:3612191]	-1.69269	1464.95	4735.42	1.84273e-32	1.07271e-29	1313	1305.09	1932.81	1308.9	4324.07	5111.02	4340.65	5165.96		Cd6	CD6 antigen [Source:MGI Symbol;Acc:MGI:103566]	57.9356	2269.35	-5.29458	1.30122e-160	8.74081e-158	46.9075	81.8899	56.3049	46.6402	2589.59	2449.99	1789.13	2248.69		Ablim1	actin-binding LIM protein 1 [Source:MGI Symbol;Acc:MGI:1194500]	1417.24	450.103	1.65114	2.69764e-29	1.36607e-26	1381.17	1414.39	1439.04	1434.38	541.944	424.069	392.892	441.506		Card6	caspase recruitment domain family, member 6 [Source:MGI Symbol;Acc:MGI:3032959]
Siglecg	sialic acid binding Ig-like lectin G [Source:MGI Symbol;Acc:MGI:2443630]	2.3405	3742.71	738.824	2.42896e-32	1.37772e-29	3518.87	4544.11	2234.22	4673.63	875.872	640.268	764.033	675.122		Il1rn	interleukin 1 receptor antagonist [Source:MGI Symbol;Acc:MGI:96547]	60.7455	1855.8	-4.92882	4.78936e-160	3.1347e-157	69.989	60.9625	49.8437	62.1869	2274.82	1891.97	1802.12	1454.27		Tap1	transporter 1, ATP-binding cassette, sub-family B (MDR/TAP) [Source:MGI Symbol;Acc:MGI:98483]	3444.3	10471.3	-1.60414	8.19971e-28	4.04582e-25	3447.83	3917.9	3022.69	3388.77	8889.76	11306.4	10838.1	10850.8		Filip1l	filamin A interacting protein 1-like [Source:MGI Symbol;Acc:MGI:1925999]
Pou2af1	POU domain, class 2, associating factor 1 [Source:MGI Symbol;Acc:MGI:105086]	2.10356	3860.3	898.101	6.63388e-32	3.6687e-29	3987.42	4530.7	2489.26	4433.8	974.438	850.838	1039.9	727.225		Plac8	placenta-specific 8 [Source:MGI Symbol;Acc:MGI:2445289]	271.953	5382.87	-4.30861	7.74706e-160	4.94378e-157	218.902	313.911	291.678	263.323	4608.14	4919.79	5148.75	6854.79		Cd79a	CD79A antigen (immunoglobulin-associated alpha) [Source:MGI Symbol;Acc:MGI:101774]	4648.21	643.741	2.85423	9.31129e-28	4.47943e-25	3889.77	5782.72	4400.65	4519.72	673.142	380.2	886.402	635.218		Fam169b	family with sequence similarity 169, member B [Source:MGI Symbol;Acc:MGI:3644026]
Ccr7	chemokine (C-C motif) receptor 7 [Source:MGI Symbol;Acc:MGI:103011]	2.4684	395.893	71.1645	8.42859e-32	4.54753e-29	463.287	422.66	298.247	399.378	88.1481	72.7578	52.8034	70.9487		Gm15931	predicted gene 15931 [Source:MGI Symbol;Acc:MGI:3805553]	31.5973	1745.53	-5.79157	4.83717e-159	3.01155e-156	27.5489	31.8461	37.8443	29.1501	2259.61	1830.34	1533.69	1358.47		Chst10	carbohydrate sulfotransferase 10 [Source:MGI Symbol;Acc:MGI:2138283]	755.459	101.907	2.88031	2.97845e-27	1.39791e-24	906.875	487.889	895.58	731.492	126.911	111.501	71.8705	97.3477		Als2cl	ALS2 C-terminal like [Source:MGI Symbol;Acc:MGI:2447532]
Cacna1i	calcium channel, voltage-dependent, alpha 1I subunit [Source:MGI Symbol;Acc:MGI:2178051]	3.52147	275.672	23.7171	3.99874e-31	2.1061e-28	267.443	353.591	169.674	311.982	26.4444	33.383	15.0867	19.9543		Fpr2	formyl peptide receptor 2 [Source:MGI Symbol;Acc:MGI:1278319]	93.9414	4124.18	-5.45853	3.58045e-158	2.17606e-155	74.4564	137.393	79.3807	84.5353	4873.77	3370.11	3503.58	4749.26		Igfbp3	insulin-like growth factor binding protein 3 [Source:MGI Symbol;Acc:MGI:96438]	86.252	432.937	-2.32693	3.42498e-27	1.56921e-24	101.332	85.7502	70.0654	87.8608	529.081	342.728	444	415.94		Bcl11b	B cell leukemia/lymphoma 11B [Source:MGI Symbol;Acc:MGI:1929913]
Col5a3	collagen, type V, alpha 3 [Source:MGI Symbol;Acc:MGI:1858212]	2.60394	826.285	135.782	5.40918e-31	2.78271e-28	898.145	982.426	450.005	974.563	141.037	147.228	119.616	135.246		Stat1	signal transducer and activator of transcription 1 [Source:MGI Symbol;Acc:MGI:103063]	1114.31	10440.1	-3.22772	5.20081e-157	3.08735e-154	1157.8	959.022	1278.4	1062.04	11784.8	10574.8	10098.4	9302.62		Apol11b	apolipoprotein L 11b [Source:MGI Symbol;Acc:MGI:3036248]	6415.44	51965.8	-3.01795	4.6992e-27	2.10295e-24	7080.44	9073.75	3844.62	5662.93	36491.1	58444.8	60098.1	52829.3		Gramd1a	GRAM domain containing 1A [Source:MGI Symbol;Acc:MGI:105490]
Rapgefl1	Rap guanine nucleotide exchange factor (GEF)-like 1 [Source:MGI Symbol;Acc:MGI:3611446]	3.20372	422.266	45.7436	1.01452e-30	5.10052e-28	423.276	549.457	224.476	491.855	58.4983	35.9509	44.1824	44.343		Il18bp	interleukin 18 binding protein [Source:MGI Symbol;Acc:MGI:1333800]	284.357	4641.94	-4.0314	8.82715e-157	5.12095e-154	224.858	278.426	301.831	332.311	5658.96	4349.66	4400.85	4158.3		Gm10371	predicted gene 10371 [Source:MGI Symbol;Acc:MGI:3642716]	438.673	137.795	1.66712	1.22314e-26	5.3493e-24	453.012	398.196	443.748	459.737	152.636	127.952	130.964	139.63		Grap	GRB2-related adaptor protein [Source:MGI Symbol;Acc:MGI:1918770]
Pafah1b3	platelet-activating factor acetylhydrolase, isoform 1b, subunit 3 [Source:MGI Symbol;Acc:MGI:108414]	1.85986	1216.86	335.11	1.14027e-30	5.60534e-28	1274.04	1388.59	870.502	1334.31	330.155	368.925	287.725	353.635		Fcgr2b	Fc receptor, IgG, low affinity IIb [Source:MGI Symbol;Acc:MGI:95499]	1390.56	10764.2	-2.95311	7.17668e-156	4.07093e-153	1201.73	1310.24	1526.69	1523.58	11719.3	10916	10078.9	10342.5		Blnk	B cell linker [Source:MGI Symbol;Acc:MGI:96878]	1601.33	560.885	1.51682	4.17694e-25	1.78615e-22	1644.3	1715	1483.95	1562.08	525.651	484.389	648.431	585.069		Pxdc1	PX domain containing 1 [Source:MGI Symbol;Acc:MGI:1914145]
Ighv1-75	immunoglobulin heavy variable 1-75 [Source:MGI Symbol;Acc:MGI:4439735]	-2.93388	55.1246	421.13	1.2112e-30	5.82457e-28	38.9582	48.4512	84.3102	48.779	434.33	356.085	558.207	335.898		Ikbke	inhibitor of kappaB kinase epsilon [Source:MGI Symbol;Acc:MGI:1929612]	421.732	6191.77	-3.87825	1.33172e-155	7.3899e-153	307.505	413.999	468.9	496.523	6409.04	6404.53	5646.64	6306.88		Cd163	CD163 antigen [Source:MGI Symbol;Acc:MGI:2135946]	590.29	126.869	2.20715	4.65579e-25	1.94764e-22	616.505	505.631	641.368	597.658	168.929	131.608	95.8273	111.114		Shisa5	shisa family member 5 [Source:MGI Symbol;Acc:MGI:1915044]
Myof	myoferlin [Source:MGI Symbol;Acc:MGI:1919192]	-2.5149	525.257	3002.02	2.6538e-30	1.24904e-27	512.774	354.622	794.623	439.011	2226.94	3359.7	2681.12	3740.33		Cd274	CD274 antigen [Source:MGI Symbol;Acc:MGI:1926446]	433.07	8706.13	-4.32899	1.51837e-154	8.24634e-152	454.184	342.118	548.28	387.696	10521	7365.37	7941.23	8996.91		Cxcl9	chemokine (C-X-C motif) ligand 9 [Source:MGI Symbol;Acc:MGI:1352449]	179.915	2584.32	-3.84512	6.6931e-25	2.74033e-22	169.454	301.604	123.962	124.64	2532.21	3633.83	1240.96	2930.26		Stk10	serine/threonine kinase 10 [Source:MGI Symbol;Acc:MGI:1099439]
Alox12	arachidonate 12-lipoxygenase [Source:MGI Symbol;Acc:MGI:87998]	1.37237	1444.19	557.721	2.87342e-30	1.32423e-27	1355.11	1561.78	1228.82	1631.05	587.387	540.12	566.828	536.55		Ms4a4b	membrane-spanning 4-domains, subfamily A, member 4B [Source:MGI Symbol;Acc:MGI:1913083]	218.064	3605.09	-4.05044	6.75863e-153	3.59418e-150	157.848	251.129	243.68	219.597	3993.8	3758.63	3232.99	3434.93		Ehd2	EH-domain containing 2 [Source:MGI Symbol;Acc:MGI:2154274]	404.584	100.364	2.00467	1.59675e-24	6.4013e-22	407.029	465.22	377.275	368.811	125.196	85.9105	91.0359	99.3143		Itk	IL2 inducible T cell kinase [Source:MGI Symbol;Acc:MGI:96621]
Sbk1	SH3-binding kinase 1 [Source:MGI Symbol;Acc:MGI:2135937]	2.19172	1917.99	419.807	4.16711e-30	1.88124e-27	2146.91	2114.33	1201.42	2209.28	448.754	404.02	327.597	498.858		Gbp2	guanylate binding protein 2 [Source:MGI Symbol;Acc:MGI:102772]	2318.72	39579.3	-4.09314	5.96757e-152	3.10874e-149	2603	1958.08	2872.47	1841.31	46474.6	36246.8	39488.6	36107.1		H2-Q7	histocompatibility 2, Q region locus 7 [Source:MGI Symbol;Acc:MGI:95936]	525.75	2836.3	-2.43158	3.6879e-24	1.44829e-21	620.762	578.568	323.379	580.29	2290.4	2676.02	2983.42	3395.37		Klf2	Kruppel-like factor 2 (lung) [Source:MGI Symbol;Acc:MGI:1342772]
Cttnbp2nl	CTTNBP2 N-terminal like [Source:MGI Symbol;Acc:MGI:1933137]	-2.18358	128.896	585.608	3.20141e-29	1.41637e-26	148.462	103.088	137.004	127.029	514.465	624.861	452.6	750.505		Ccl8	chemokine (C-C motif) ligand 8 [Source:MGI Symbol;Acc:MGI:101878]	130.791	4878.55	-5.2239	1.33885e-150	6.83508e-148	105.728	132.844	131.07	153.524	6228.83	5852.02	3644.28	3789.08		Fcrla	Fc receptor-like A [Source:MGI Symbol;Acc:MGI:2138647]	1578.66	260.095	2.60928	5.25636e-24	2.02296e-21	1336.9	1793.86	1707.62	1476.27	228.954	182.788	402.475	226.161		Ablim1	actin-binding LIM protein 1 [Source:MGI Symbol;Acc:MGI:1194500]
Snn	stannin [Source:MGI Symbol;Acc:MGI:1276549]	2.05651	2286.08	549.27	1.64725e-28	7.14486e-26	2396.46	2607.09	1526.01	2614.76	564.148	641.124	398.719	593.087		Aif1	allograft inflammatory factor 1 [Source:MGI Symbol;Acc:MGI:1343098]	292.57	4571.94	-3.96771	1.54736e-150	7.74471e-148	237.516	289.344	347.06	296.359	5468.22	4735.98	4236.33	3847.21		Scd1	stearoyl-Coenzyme A desaturase 1 [Source:MGI Symbol;Acc:MGI:98239]	1171.54	110.395	3.39615	9.59662e-24	3.62093e-21	1212.57	1221.2	1095.9	1156.49	192.939	84.0827	49.5108	115.047		Tecpr1	tectonin beta-propeller repeat containing 1 [Source:MGI Symbol;Acc:MGI:1917631]
Ccr5	chemokine (C-C motif) receptor 5 [Source:MGI Symbol;Acc:MGI:107182]	-2.50877	402.642	2291.56	1.79879e-28	7.59523e-26	474.869	320.603	485.837	329.258	1481.69	2786.19	1751.13	3147.24		Irgm1	immunity-related GTPase family M member 1 [Source:MGI Symbol;Acc:MGI:107567]	1675.84	17389.6	-3.37537	2.12577e-150	1.04351e-147	1600.07	1472.2	1991.9	1639.21	19639	15628.9	18830.8	15459.9		Gbp5	guanylate binding protein 5 [Source:MGI Symbol;Acc:MGI:2429943]	197.692	1520.8	-2.9443	1.22395e-23	4.52932e-21	185.633	263.164	180.553	161.419	1173.07	2368.02	1031.74	1510.36		Grap2	GRB2-related adaptor protein 2 [Source:MGI Symbol;Acc:MGI:1333842]
Smpdl3b	sphingomyelin phosphodiesterase, acid-like 3B [Source:MGI Symbol;Acc:MGI:1916022]	-2.33552	112.422	567.321	1.81975e-28	7.59523e-26	122.139	83.501	146.489	97.5579	453.562	652.252	481.696	681.773		Il2rg	interleukin 2 receptor, gamma chain [Source:MGI Symbol;Acc:MGI:96551]	497.007	4504.13	-3.18126	7.6694e-147	3.69376e-144	426.635	505.898	511.359	544.135	4986.11	4734.88	4423.58	3871.96		Gbp7	guanylate binding protein 7 [Source:MGI Symbol;Acc:MGI:2444421]	616.673	3002.71	-2.28394	2.48341e-23	9.01664e-21	724.648	492.817	611.725	637.501	3124.75	4020.43	2124.17	2741.47		Gimap6	GTPase, IMAP family member 6 [Source:MGI Symbol;Acc:MGI:1918876]
Cr2	complement receptor 2 [Source:MGI Symbol;Acc:MGI:88489]	4.06353	303.248	18.2709	7.03758e-28	2.88293e-25	352.73	352.56	159.135	348.566	23.2391	5.13584	25.8629	18.8458		Cyba	cytochrome b-245, alpha polypeptide [Source:MGI Symbol;Acc:MGI:1316658]	1423.15	10381.8	-2.86698	6.11999e-146	2.89294e-143	1340.22	1480.39	1590.38	1281.63	10859.2	10602.3	9000.85	11064.8		Serpina3g	serine (or cysteine) peptidase inhibitor, clade A, member 3G [Source:MGI Symbol;Acc:MGI:105046]	428.391	3139.23	-2.87345	3.78388e-23	1.34839e-20	465.785	522.386	349.429	375.962	1741.59	4561.48	2886	3367.84		Fchsd2	FCH and double SH3 domains 2 [Source:MGI Symbol;Acc:MGI:2448475]
Cxcl16	chemokine (C-X-C motif) ligand 16 [Source:MGI Symbol;Acc:MGI:1932682]	-2.83495	129.196	921.689	2.64413e-27	1.06347e-24	171.627	98.9642	149.651	96.5417	624.249	1107.63	640.106	1314.77		Trac	T cell receptor alpha constant [Source:MGI Symbol;Acc:MGI:4439838]	96.2812	1875.88	-4.28357	1.5267e-145	7.08557e-143	97.5379	91.8987	103.379	92.3086	2185.88	2130.81	1481.74	1705.08		Myof	myoferlin [Source:MGI Symbol;Acc:MGI:1919192]	135.476	612.668	-2.18039	1.20894e-22	4.22974e-20	118.362	142.917	143.724	136.899	608.829	781.42	423.237	637.185		Stk17b	serine/threonine kinase 17b (apoptosis-inducing) [Source:MGI Symbol;Acc:MGI:2138162]
Sox4	SRY (sex determining region Y)-box 4 [Source:MGI Symbol;Acc:MGI:98366]	1.79227	2093.91	604.173	2.82804e-27	1.11713e-24	2274.32	2271.02	1397.44	2432.85	662.714	637.701	580.837	535.441		Casp1	caspase 1 [Source:MGI Symbol;Acc:MGI:96544]	261.103	2632	-3.33508	5.87136e-145	2.67629e-142	226.348	265.687	304.6	247.776	2932.46	2498.42	2398.49	2698.64		Lap3	leucine aminopeptidase 3 [Source:MGI Symbol;Acc:MGI:1914238]	853.698	2752.75	-1.68943	1.29737e-22	4.45807e-20	823.425	820.048	856.954	914.365	2213.22	3367.88	2469.15	2960.75		Blk	B lymphoid kinase [Source:MGI Symbol;Acc:MGI:88169]
Gvin1	GTPase, very large interferon inducible 1 [Source:MGI Symbol;Acc:MGI:1921808]	-1.6116	231.738	708.095	3.44639e-27	1.3375e-24	236.908	226.793	251.877	211.376	678.741	748.977	575.449	829.213		Slc28a2	solute carrier family 28 (sodium-coupled nucleoside transporter), member 2 [Source:MGI Symbol;Acc:MGI:1913105]	248.124	2373	-3.25758	1.53473e-144	6.8729e-142	253.896	231.111	234.45	273.039	2610.66	2587.57	2143.06	2150.73		Gbp8	guanylate-binding protein 8 [Source:MGI Symbol;Acc:MGI:1923324]	101.683	686.184	-2.75635	2.54646e-22	8.59677e-20	103.886	123.204	97.912	81.731	746.887	943.188	392.892	661.768		Ets1	E26 avian leukemia oncogene 1, 5' domain [Source:MGI Symbol;Acc:MGI:95455]
Cacna1g	calcium channel, voltage-dependent, T type, alpha 1G subunit [Source:MGI Symbol;Acc:MGI:1201678]	2.10905	811.911	188.013	8.87472e-27	3.38479e-24	966.585	879.338	521.669	880.054	217.966	172.907	200.437	160.743		Ifi30	interferon gamma inducible protein 30 [Source:MGI Symbol;Acc:MGI:2137648]	876.296	8229.51	-3.23139	2.27613e-142	1.00173e-139	836.146	832.547	1050.41	786.081	8840.66	9029.52	7931.48	7116.36		Ifi44	interferon-induced protein 44 [Source:MGI Symbol;Acc:MGI:2443016]	106.252	453.639	-2.09208	2.66889e-22	8.85474e-20	136.244	87.7215	113.183	87.8608	419.32	534.656	394.489	466.089		Ly6d	lymphocyte antigen 6 complex, locus D [Source:MGI Symbol;Acc:MGI:96881]
Grap2	GRB2-related adaptor protein 2 [Source:MGI Symbol;Acc:MGI:1333842]	1.30942	2106.45	850.363	1.12876e-26	4.2321e-24	2423.83	2175.15	1727.3	2099.53	822.182	798.624	839.466	941.179		H2-T23	histocompatibility 2, T region locus 23 [Source:MGI Symbol;Acc:MGI:95957]	4605.65	25159.6	-2.44966	8.81375e-142	3.81322e-139	4561.2	4075.39	5083.13	4702.88	27141	24442.7	25033.7	24020.8		Arl5c	ADP-ribosylation factor-like 5C [Source:MGI Symbol;Acc:MGI:3028577]	1161.22	343.067	1.76378	5.49685e-22	1.79281e-19	989.473	1306.95	1155.18	1193.27	271.829	326.277	415.252	358.908		Lbh	limb-bud and heart [Source:MGI Symbol;Acc:MGI:1925139]
Acp2	acid phosphatase 2, lysosomal [Source:MGI Symbol;Acc:MGI:87882]	-1.37896	597.018	1553.29	2.74342e-26	9.94873e-24	523.303	594.816	644.973	624.98	1269.33	1709.38	1518.37	1716.07		Tnfaip2	tumor necrosis factor, alpha-induced protein 2 [Source:MGI Symbol;Acc:MGI:104960]	1209.01	14109.5	-3.54529	7.20883e-141	3.06688e-138	1042.39	1018.16	1356.86	1418.64	16542.7	13371.5	13062.9	13460.9		Tgtp1	T cell specific GTPase 1 [Source:MGI Symbol;Acc:MGI:98734]	42.5466	737.846	-4.11772	1.20556e-21	3.86643e-19	38.3187	32.5259	50.3034	49.0386	735.74	1159.79	209.223	846.63		Ralgps2	Ral GEF with PH domain and SH3 binding motif 2 [Source:MGI Symbol;Acc:MGI:1925505]
Ccdc92b	coiled-coil domain containing 92B [Source:MGI Symbol;Acc:MGI:3588240]	1.42102	889.487	331.77	3.78322e-26	1.34981e-23	962.373	914.388	834.671	846.518	388.653	297.879	354.537	286.012		Itgb2	integrin beta 2 [Source:MGI Symbol;Acc:MGI:96611]	2137.26	21277.1	-3.31582	9.18486e-141	3.84349e-138	1741.54	2205.57	2284.5	2317.43	24003.8	23273.8	19352.5	18478.2		Rapgefl1	Rap guanine nucleotide exchange factor (GEF)-like 1 [Source:MGI Symbol;Acc:MGI:3611446]	172.832	18.3739	3.22018	1.38119e-21	4.35709e-19	117.511	222.753	158.995	192.068	24.0102	11.8812	15.9712	21.6328		Gm12250	predicted gene 12250 [Source:MGI Symbol;Acc:MGI:3649299]
Maf	avian musculoaponeurotic fibrosarcoma oncogene homolog [Source:MGI Symbol;Acc:MGI:96909]	-2.16979	575.487	2589.54	1.81493e-25	6.37271e-23	705.459	468.018	667.104	461.368	1752.55	3010.46	2155.24	3439.91		Ly6c2	lymphocyte antigen 6 complex, locus C2 [Source:MGI Symbol;Acc:MGI:3712069]	537.649	13093.5	-4.60679	2.00413e-140	8.25121e-138	486.945	429.467	513.205	720.979	11621	17410.8	11583.3	11759.1		Apol9b	apolipoprotein L 9b [Source:MGI Symbol;Acc:MGI:1919148]	21.1261	151.029	-2.82665	1.90046e-21	5.89847e-19	30.6549	17.7414	19.762	16.3462	116.621	167.251	150.129	170.113		Hvcn1	hydrogen voltage-gated channel 1 [Source:MGI Symbol;Acc:MGI:1921346]
Cnp	2',3'-cyclic nucleotide 3' phosphodiesterase [Source:MGI Symbol;Acc:MGI:88437]	1.30701	4323.43	1746.4	2.33323e-25	8.06459e-23	4385.43	4582.25	3614.8	4711.23	2043.43	1828.36	1511.9	1601.89		Gbp3	guanylate binding protein 3 [Source:MGI Symbol;Acc:MGI:1926263]	1502.6	14422.6	-3.26279	6.20635e-139	2.51465e-136	1515.19	1230.17	1784.22	1480.82	16212.8	13088.6	14978.7	13410.3		Il12rb1	interleukin 12 receptor, beta 1 [Source:MGI Symbol;Acc:MGI:104579]	47.9081	300.401	-2.6515	4.85893e-21	1.48413e-18	40.0217	35.4829	61.981	54.1468	272.687	414.016	226.791	288.11		Icosl	icos ligand [Source:MGI Symbol;Acc:MGI:1354701]
Il7r	interleukin 7 receptor [Source:MGI Symbol;Acc:MGI:96562]	1.83882	1349.29	377.1	4.21619e-25	1.43487e-22	1495.15	1506.11	871.556	1524.34	369.421	413.435	328.674	396.87		Fcer1g	Fc receptor, IgE, high affinity I, gamma polypeptide [Source:MGI Symbol;Acc:MGI:95496]	1046.51	10772.1	-3.36411	1.67049e-138	6.66266e-136	920.281	921.716	1247.02	1097.02	12685.9	10495.5	9895.96	10010.9		Nlrc5	NLR family, CARD domain containing 5 [Source:MGI Symbol;Acc:MGI:3612191]	553.454	2167.22	-1.97003	1.81305e-20	5.45132e-18	602.88	599.266	474.289	537.381	2706.29	2536.19	1659.41	1767.01		Rasgrp1	RAS guanyl releasing protein 1 [Source:MGI Symbol;Acc:MGI:1314635]
Ralgps2	Ral GEF with PH domain and SH3 binding motif 2 [Source:MGI Symbol;Acc:MGI:1925505]	1.60431	1684.89	554.295	1.24126e-24	4.16029e-22	1731.01	1867.95	1179.29	1961.32	567.353	507.593	603.467	538.767		Ms4a6b	membrane-spanning 4-domains, subfamily A, member 6B [Source:MGI Symbol;Acc:MGI:1917024]	524.375	4340.06	-3.04886	4.12987e-137	1.62183e-134	527.896	569.59	494.745	505.268	4379.96	4255.01	3680	5045.29		Cd22	CD22 antigen [Source:MGI Symbol;Acc:MGI:88322]	889.144	178.64	2.30794	2.70523e-20	8.00873e-18	833.644	1136.44	796.77	789.725	240.102	204.723	126.173	143.563		Nedd9	neural precursor cell expressed, developmentally down-regulated gene 9 [Source:MGI Symbol;Acc:MGI:97302]
F830016B08Rik	RIKEN cDNA F830016B08 gene [Source:MGI Symbol;Acc:MGI:3588218]	-5.00273	19.9765	640.592	2.01313e-24	6.64664e-22	9.47632	16.494	30.5624	23.3733	363.01	855.118	401.952	942.288		Glrx	glutaredoxin [Source:MGI Symbol;Acc:MGI:2135625]	336.572	4578.05	-3.76566	5.1e-137	1.97246e-134	335.054	389.432	277.832	343.971	5661.3	4565.39	4206.02	3879.5		Sbk1	SH3-binding kinase 1 [Source:MGI Symbol;Acc:MGI:2135937]	1326.08	309.972	2.1018	4.40122e-20	1.28322e-17	1090.8	1383.83	1370.77	1458.9	310.417	204.723	412.057	312.693		Rassf2	Ras association (RalGDS/AF-6) domain family member 2 [Source:MGI Symbol;Acc:MGI:2442060]
Gm30211	predicted gene, 30211 [Source:MGI Symbol;Acc:MGI:5589370]	2.37334	450.375	87.2414	3.13243e-24	1.01901e-21	422.223	528.84	308.786	541.65	90.5522	58.2062	92.6753	107.532		Hck	hemopoietic cell kinase [Source:MGI Symbol;Acc:MGI:96052]	659.152	6090.63	-3.20801	1.16048e-136	4.42127e-134	635.858	691.515	656.275	652.962	7157.95	6568.52	5666.12	4969.93		Chst3	carbohydrate sulfotransferase 3 [Source:MGI Symbol;Acc:MGI:1858224]	1427.9	167.345	3.08866	4.77103e-20	1.37028e-17	1195.54	1557.3	1472.27	1486.48	301.842	89.5663	124.575	153.396		Tcf7	transcription factor 7, T cell specific [Source:MGI Symbol;Acc:MGI:98507]
Tnip3	TNFAIP3 interacting protein 3 [Source:MGI Symbol;Acc:MGI:3041165]	-3.32354	25.9044	259.731	3.70562e-24	1.188e-21	26.3231	36.0807	15.8082	25.4057	159.468	309.863	200.437	369.155		Psme2	proteasome (prosome, macropain) activator subunit 2 (PA28 beta) [Source:MGI Symbol;Acc:MGI:1096365]	955.061	4485.54	-2.23176	3.58496e-136	1.34573e-133	957.51	883.501	996.874	982.358	4203.26	4638.03	4647.62	4453.24		Ebf1	early B cell factor 1 [Source:MGI Symbol;Acc:MGI:95275]	948.789	231.619	2.03168	6.13578e-20	1.73633e-17	842.159	973.807	1061.76	917.43	324.995	172.735	212.417	216.328		Ifitm3	interferon induced transmembrane protein 3 [Source:MGI Symbol;Acc:MGI:1913391]
Gbgt1	globoside alpha-1,3-N-acetylgalactosaminyltransferase 1 [Source:MGI Symbol;Acc:MGI:2449143]	-3.46297	14.0357	154.53	5.74197e-24	1.81455e-21	8.4234	15.4632	21.0775	11.1785	138.633	204.578	116.383	158.526		Mefv	Mediterranean fever [Source:MGI Symbol;Acc:MGI:1859396]	79.3524	2339.82	-4.8878	1.85027e-133	6.84491e-131	49.8858	111.916	89.534	66.0735	2348.54	2492.91	2170.12	2347.72		Gvin1	GTPase, very large interferon inducible 1 [Source:MGI Symbol;Acc:MGI:1921808]	70.4509	411.469	-2.55065	1.25895e-19	3.51102e-17	59.6068	72.937	73.6585	75.6011	514.503	544.709	265.122	321.542		Ccr7	chemokine (C-C motif) receptor 7 [Source:MGI Symbol;Acc:MGI:103011]
Cd72	CD72 antigen [Source:MGI Symbol;Acc:MGI:88345]	1.92898	2321.1	609.608	1.6027e-23	4.99343e-21	2328.02	2844.19	1352.12	2760.08	605.818	610.309	556.052	666.253		Cd5	CD5 antigen [Source:MGI Symbol;Acc:MGI:88340]	52.9503	1378.53	-4.7046	5.33945e-133	1.94707e-130	46.9075	70.0613	44.3055	50.5268	1558.67	1472.63	1081.27	1401.53		Ly6a	lymphocyte antigen 6 complex, locus A [Source:MGI Symbol;Acc:MGI:107527]	569.497	3255.31	-2.51485	1.47497e-19	4.0547e-17	538.164	656.433	569.506	513.883	1636.98	4075.27	3799.55	3509.43		Bcl9l	B cell CLL/lymphoma 9-like [Source:MGI Symbol;Acc:MGI:1933114]
Bcl7a	B cell CLL/lymphoma 7A [Source:MGI Symbol;Acc:MGI:1924295]	1.96702	3326.84	850.845	1.8735e-23	5.75605e-21	3279.86	3981.25	1896.98	4149.26	965.623	775.512	831.923	830.322		Ifi209	interferon activated gene 209 [Source:MGI Symbol;Acc:MGI:2138243]	634.666	4088.28	-2.68817	1.21665e-132	4.3741e-130	564.38	680.596	693.196	600.492	4143.58	4404.7	4055.58	3749.25		Cd209d	CD209d antigen [Source:MGI Symbol;Acc:MGI:2157947]	98.6443	7.82297	3.64628	1.856e-19	5.03028e-17	132.838	96.5922	84.4378	80.7093	11.1476	8.22548	7.98561	3.93324		Tubb3	tubulin, beta 3 class III [Source:MGI Symbol;Acc:MGI:107813]
Gm15931	predicted gene 15931 [Source:MGI Symbol;Acc:MGI:3805553]	-2.73302	90.7444	603.205	1.98224e-23	6.00672e-21	95.8161	63.9144	142.273	60.9737	435.131	623.149	506.481	848.059		Msrb1	methionine sulfoxide reductase B1 [Source:MGI Symbol;Acc:MGI:1351642]	643.916	3393.7	-2.39839	1.94075e-132	6.88051e-130	605.331	685.145	651.66	633.529	3606.48	3250.14	3171.29	3546.88		Tubb3	tubulin, beta 3 class III [Source:MGI Symbol;Acc:MGI:107813]	21.0982	346.908	-4.02953	2.78006e-19	7.43011e-17	34.9126	18.7271	21.5586	9.19473	136.343	477.992	423.237	350.058		Ltb	lymphotoxin B [Source:MGI Symbol;Acc:MGI:104796]
Cd6	CD6 antigen [Source:MGI Symbol;Acc:MGI:103566]	-2.05699	152.874	636.208	2.89385e-23	8.65065e-21	175.838	113.396	202.344	119.915	509.656	634.277	629.33	771.568		Psmb10	proteasome (prosome, macropain) subunit, beta type 10 [Source:MGI Symbol;Acc:MGI:1096380]	1172.85	6723.9	-2.51908	2.54638e-132	8.90396e-130	1188.32	1186.49	1196.25	1120.34	7387.31	7070.41	6626.17	5811.71		Lynx1	Ly6/neurotoxin 1 [Source:MGI Symbol;Acc:MGI:1345180]	327.617	93.6777	1.79752	3.47503e-19	9.16028e-17	260.567	360.742	330.565	358.595	107.188	87.7384	81.4532	98.331		Egr3	early growth response 3 [Source:MGI Symbol;Acc:MGI:1306780]
Tigit	T cell immunoreceptor with Ig and ITIM domains [Source:MGI Symbol;Acc:MGI:3642260]	-2.93541	44.063	337.054	3.88649e-23	1.14631e-20	46.3287	28.8646	69.5559	31.5031	225.178	332.118	329.752	461.167		Igtp	interferon gamma induced GTPase [Source:MGI Symbol;Acc:MGI:107729]	1286.91	20147.3	-3.96853	1.29321e-131	4.46087e-129	1307.45	1007.25	1704.84	1128.11	21755.9	18015	22790	18028.3		Il7r	interleukin 7 receptor [Source:MGI Symbol;Acc:MGI:96562]	672.959	218.197	1.61982	6.04381e-19	1.57164e-16	581.592	607.151	794.075	709.016	255.537	219.346	188.46	209.445		H2-DMb2	histocompatibility 2, class II, locus Mb2 [Source:MGI Symbol;Acc:MGI:95923]
Icam1	intercellular adhesion molecule 1 [Source:MGI Symbol;Acc:MGI:96392]	-1.32251	602.098	1505.91	4.87215e-23	1.41812e-20	569.632	581.415	690.289	567.055	1319.02	1691.4	1308.23	1704.99		Rnf19b	ring finger protein 19B [Source:MGI Symbol;Acc:MGI:1922484]	1365.28	8061.26	-2.56142	1.07821e-130	3.66964e-128	1427.33	1553.18	1273.78	1206.81	8439.29	8008.14	7642.5	8155.13		Klhl14	kelch-like 14 [Source:MGI Symbol;Acc:MGI:1921249]	103.754	4.34314	4.84975	1.01658e-18	2.60827e-16	88.5587	113.348	99.7085	113.402	1.71501	0.913942	12.777	1.96662		Cd37	CD37 antigen [Source:MGI Symbol;Acc:MGI:88330]
Kmo	kynurenine 3-monooxygenase (kynurenine 3-hydroxylase) [Source:MGI Symbol;Acc:MGI:2138151]	1.56956	841.547	282.886	5.42903e-23	1.55968e-20	967.638	870.06	656.565	871.924	325.347	309.007	251.085	246.103		Itgal	integrin alpha L [Source:MGI Symbol;Acc:MGI:96606]	1083.19	12633.1	-3.54449	3.11557e-130	1.04642e-127	848.059	1201.05	1120.56	1163.09	13870.1	14572.3	11526	10564.2		Tmprss3	transmembrane protease, serine 3 [Source:MGI Symbol;Acc:MGI:2155445]	212.883	62.1911	1.7779	1.10049e-18	2.78641e-16	198.406	205.998	218.281	228.847	69.4579	63.062	67.0791	49.1655		Mapk11	mitogen-activated protein kinase 11 [Source:MGI Symbol;Acc:MGI:1338024]
Serpinb9	serine (or cysteine) peptidase inhibitor, clade B, member 9 [Source:MGI Symbol;Acc:MGI:106603]	-1.35663	381.157	976.425	1.05186e-22	2.98311e-20	414.852	382.455	389.934	337.388	818.175	1049.42	907.356	1130.75		Cybb	cytochrome b-245, beta polypeptide [Source:MGI Symbol;Acc:MGI:88574]	2485.87	29641.7	-3.576	8.52738e-130	2.82688e-127	2031.92	2797.9	2697.1	2416.54	35920.8	31787.1	24673.3	26185.5		H2-T22	histocompatibility 2, T region locus 22 [Source:MGI Symbol;Acc:MGI:95956]	1786.87	6422.76	-1.84558	1.36113e-18	3.40159e-16	1657.92	2099.4	1581.86	1808.3	4509.62	6618.77	8174.07	6388.56		Btla	B and T lymphocyte associated [Source:MGI Symbol;Acc:MGI:2658978]
Cxxc5	CXXC finger 5 [Source:MGI Symbol;Acc:MGI:1914643]	1.49747	888.42	314.536	1.91888e-22	5.37311e-20	1020.28	938.098	649.188	946.109	318.936	326.982	298.501	313.726		Ms4a4c	membrane-spanning 4-domains, subfamily A, member 4C [Source:MGI Symbol;Acc:MGI:1927656]	233.78	2425.84	-3.37816	9.75934e-130	3.19381e-127	200.288	202.905	250.141	281.784	2279.5	2576.56	2580.33	2266.99		Il2ra	interleukin 2 receptor, alpha chain [Source:MGI Symbol;Acc:MGI:96549]	206.118	41.1756	2.31332	1.47066e-18	3.6282e-16	193.296	160.658	248.822	221.695	46.3053	51.1807	36.7338	30.4826		Fcgr4	Fc receptor, IgG, low affinity IV [Source:MGI Symbol;Acc:MGI:2179523]
Tgm2	transglutaminase 2, C polypeptide [Source:MGI Symbol;Acc:MGI:98731]	-1.3853	1121.09	2928.71	2.33129e-22	6.44631e-20	1030.81	1083.45	1258.33	1111.75	2513.82	3334.87	2368.61	3497.55		Gm21188	predicted gene, 21188 [Source:MGI Symbol;Acc:MGI:5434543]	94.8372	1583.73	-4.06914	1.51917e-129	4.90865e-127	68.4999	89.169	107.995	113.685	1731.86	1515.56	1431.95	1655.57		Bank1	B cell scaffold protein with ankyrin repeats 1 [Source:MGI Symbol;Acc:MGI:2442120]	548.406	148.24	1.87924	2.86541e-18	6.97963e-16	528.798	608.137	488.662	568.03	205.801	130.694	119.784	136.68		Peg13	paternally expressed 13 [Source:MGI Symbol;Acc:MGI:2663476]
Tmem132e	transmembrane protein 132E [Source:MGI Symbol;Acc:MGI:2685490]	2.86584	211.1	28.7198	2.90799e-22	7.94167e-20	249.543	269.059	130.681	195.116	36.0606	30.8151	26.9405	21.0629		Lat	linker for activation of T cells [Source:MGI Symbol;Acc:MGI:1342293]	111.936	1465.58	-3.71281	3.87266e-128	1.23567e-125	102.75	106.457	119.994	118.544	1668.67	1599.21	1219.81	1374.62		AW112010	expressed sequence AW112010 [Source:MGI Symbol;Acc:MGI:2147706]	530.037	2451.77	-2.20907	6.55925e-18	1.57774e-15	546.68	624.892	472.493	476.083	1436.32	2527.05	3290.07	2553.66		Cacna1i	calcium channel, voltage-dependent, alpha 1I subunit [Source:MGI Symbol;Acc:MGI:2178051]
Tnfsf10	tumor necrosis factor (ligand) superfamily, member 10 [Source:MGI Symbol;Acc:MGI:107414]	-1.39779	286.439	754.641	3.38579e-22	9.1338e-20	288.501	254.627	313.001	289.625	694.768	854.262	632.563	836.973		Serpina3g	serine (or cysteine) peptidase inhibitor, clade A, member 3G [Source:MGI Symbol;Acc:MGI:105046]	261.693	5957.7	-4.50628	4.48187e-128	1.4124e-125	333.565	313.911	203.99	195.306	6854.88	5327.02	5062.17	6586.75		Fcrl1	Fc receptor-like 1 [Source:MGI Symbol;Acc:MGI:2442862]	285.139	47.4196	2.56567	7.49862e-18	1.78143e-15	279.3	386.369	254.212	220.674	48.8778	62.148	25.5539	53.0987		Cbx7	chromobox 7 [Source:MGI Symbol;Acc:MGI:1196439]
Slamf8	SLAM family member 8 [Source:MGI Symbol;Acc:MGI:1921998]	-2.54318	170.692	994.796	4.25124e-22	1.13303e-19	136.88	144.323	260.308	141.256	743.65	1242.87	636.873	1355.79		Trbc2	T cell receptor beta, constant 2 [Source:MGI Symbol;Acc:MGI:4835227]	131.772	1578.36	-3.58218	3.07587e-127	9.57496e-125	127.32	151.951	128.301	119.515	1741.22	1664.14	1294.49	1613.59		Akap12	A kinase (PRKA) anchor protein (gravin) 12 [Source:MGI Symbol;Acc:MGI:1932576]	927.755	187.733	2.2997	8.89855e-18	2.08823e-15	984.364	893.971	871.327	961.36	299.269	132.522	142.144	176.996		Rhof	ras homolog family member F (in filopodia) [Source:MGI Symbol;Acc:MGI:1345629]
Fgl2	fibrinogen-like protein 2 [Source:MGI Symbol;Acc:MGI:103266]	-1.43375	2627.78	7099.27	4.4142e-22	1.16246e-19	2496.48	2521.53	2941.37	2551.75	5484.42	8154.01	6013.12	8745.54		Irf5	interferon regulatory factor 5 [Source:MGI Symbol;Acc:MGI:1350924]	665.401	4490.07	-2.75503	2.40998e-126	7.41171e-124	627.668	590.517	728.272	715.149	4632.72	4979.22	4237.41	4110.93		Srpk3	serine/arginine-rich protein specific kinase 3 [Source:MGI Symbol;Acc:MGI:1891338]	269.736	16.556	3.99632	2.80579e-17	6.50505e-15	226.506	426.78	188.638	237.02	29.1552	5.48365	7.98561	23.5994		Scd1	stearoyl-Coenzyme A desaturase 1 [Source:MGI Symbol;Acc:MGI:98239]
Fcrl1	Fc receptor-like 1 [Source:MGI Symbol;Acc:MGI:2442862]	2.14289	375.411	84.7415	4.60475e-22	1.19837e-19	419.064	415.443	241.338	425.8	88.9495	99.293	78.6663	72.0573		Tyrobp	TYRO protein tyrosine kinase binding protein [Source:MGI Symbol;Acc:MGI:1277211]	789.166	5481.09	-2.79708	3.86368e-126	1.1741e-123	678.298	755.207	840.881	882.276	6034.59	5294	4988.57	5607.19		Ctsc	cathepsin C [Source:MGI Symbol;Acc:MGI:109553]	2578.1	7022.04	-1.44582	3.09405e-17	7.08796e-15	2356.17	2901.71	2451.39	2603.13	6031.69	8582.83	6021.15	7452.51		Bcl2	B cell leukemia/lymphoma 2 [Source:MGI Symbol;Acc:MGI:88138]
Klra13-ps	killer cell lectin-like receptor subfamily A, member 13, pseudogene [Source:MGI Symbol;Acc:MGI:1321090]	3.20953	142.072	15.202	4.66507e-22	1.19995e-19	177.944	153.601	112.765	123.98	21.6364	11.9836	18.3195	8.86859		Lcp2	lymphocyte cytosolic protein 2 [Source:MGI Symbol;Acc:MGI:1321402]	650.799	5948.92	-3.19177	1.92268e-125	5.77392e-123	687.977	673.317	661.813	580.087	7298.37	6021.51	5096.8	5378.98		Bpgm	2,3-bisphosphoglycerate mutase [Source:MGI Symbol;Acc:MGI:1098242]	27476.2	13571.5	1.01753	3.42885e-17	7.76252e-15	25911.9	26985.7	28047.7	28959.3	14271.5	12347.4	12748.2	14918.8		Itpkb	inositol 1,4,5-trisphosphate 3-kinase B [Source:MGI Symbol;Acc:MGI:109235]
Bcl2a1d	B cell leukemia/lymphoma 2 related protein A1d [Source:MGI Symbol;Acc:MGI:1278325]	-2.24012	68.6434	324.399	6.13548e-22	1.56003e-19	76.8635	47.4203	82.2024	68.0873	239.603	371.493	298.501	388.001		Cyrib	CYFIP related Rac1 interactor B [Source:MGI Symbol;Acc:MGI:1923520]	1114.24	6065.71	-2.44528	2.43379e-125	7.22382e-123	988.781	1167.39	1108.56	1192.24	6536.59	6280.16	5573.04	5873.07		Cd5l	CD5 antigen-like [Source:MGI Symbol;Acc:MGI:1334419]	850.769	3020.24	-1.82835	4.1359e-17	9.25432e-15	892.399	703.743	880.309	926.625	3065.58	3757.22	2017.16	3240.99		Retnlg	resistin like gamma [Source:MGI Symbol;Acc:MGI:2667763]
Serinc5	serine incorporator 5 [Source:MGI Symbol;Acc:MGI:2444223]	1.63068	4507.5	1455.15	6.41098e-22	1.61156e-19	4661.3	5150.26	3106.83	5111.63	1837.49	1319.06	1422.46	1241.6		Ifi204	interferon activated gene 204 [Source:MGI Symbol;Acc:MGI:96429]	504.481	4963.38	-3.29834	3.00891e-125	8.82821e-123	504.815	417.638	637.815	457.656	5223.66	5199.35	4891.15	4539.36		Pou2af1	POU domain, class 2, associating factor 1 [Source:MGI Symbol;Acc:MGI:105086]	3071.8	748.512	2.03439	6.12118e-17	1.35391e-14	3009.29	3000.27	3186.18	3091.47	958.691	832.601	420.043	782.715		H2-K2	histocompatibility 2, K region locus 2 [Source:MGI Symbol;Acc:MGI:95906]
Adgre1	adhesion G protein-coupled receptor E1 [Source:MGI Symbol;Acc:MGI:106912]	-1.4535	1446.22	3961.06	7.83215e-22	1.94669e-19	1500.42	1277.26	1683.04	1324.15	3160.51	4380.87	3409.59	4893.25		Csf2rb2	colony stimulating factor 2 receptor, beta 2, low-affinity (granulocyte-macrophage) [Source:MGI Symbol;Acc:MGI:1339760]	474.547	4842.24	-3.35198	5.39556e-125	1.56508e-122	428.124	391.252	548.28	530.532	5395.67	5098.09	4715.81	4159.37		Ifi47	interferon gamma inducible protein 47 [Source:MGI Symbol;Acc:MGI:99448]	1887.02	6100.6	-1.69258	7.11166e-17	1.55511e-14	2051.33	1780.06	1822.6	1894.12	4073.15	6846.34	7234.96	6247.95		Nfix	nuclear factor I/X [Source:MGI Symbol;Acc:MGI:97311]
Podnl1	podocan-like 1 [Source:MGI Symbol;Acc:MGI:2685352]	-2.18984	92.9869	424.455	8.87203e-22	2.18065e-19	68.4401	94.8407	123.304	85.3632	342.175	455.378	343.761	556.504		Slc11a1	solute carrier family 11 (proton-coupled divalent metal ion transporters), member 1 [Source:MGI Symbol;Acc:MGI:1345275]	660.915	10048.9	-3.92712	5.46301e-125	1.56684e-122	503.325	845.286	685.812	609.237	12032.9	10315	8520.28	9327.37		Dtx1	deltex 1, E3 ubiquitin ligase [Source:MGI Symbol;Acc:MGI:1352744]	214.768	41.9171	2.36062	1.08721e-16	2.3507e-14	191.593	278.935	198.519	190.024	26.5827	56.6644	43.1223	41.299		Gbp7	guanylate binding protein 7 [Source:MGI Symbol;Acc:MGI:2444421]
Ctla4	cytotoxic T-lymphocyte-associated protein 4 [Source:MGI Symbol;Acc:MGI:88556]	-2.72446	35.3254	233.392	8.97563e-22	2.18187e-19	20.0056	30.9263	54.8016	35.568	201.138	282.471	197.204	252.755		Spn	sialophorin [Source:MGI Symbol;Acc:MGI:98384]	473.208	4497.47	-3.24951	8.22868e-125	2.33384e-122	416.211	444.935	539.05	492.637	4920.58	5157.52	3930.02	3981.76		Cnp	2',3'-cyclic nucleotide 3' phosphodiesterase [Source:MGI Symbol;Acc:MGI:88437]	4350.01	2155.9	1.01371	2.30843e-16	4.93567e-14	4361.52	4505.34	4273.99	4259.2	1882.22	2149.59	2406.86	2184.91		Gm11346	predicted gene 11346 [Source:MGI Symbol;Acc:MGI:1923274]
Siglech	sialic acid binding Ig-like lectin H [Source:MGI Symbol;Acc:MGI:2443256]	1.35454	1517.41	592.796	1.01658e-21	2.44433e-19	1833.14	1521.57	1267.81	1447.11	704.384	570.935	558.207	537.658		Gimap3	GTPase, IMAP family member 3 [Source:MGI Symbol;Acc:MGI:1932723]	498.279	4319.96	-3.11583	1.50584e-123	4.22395e-121	522.684	453.124	479.976	537.333	4232.52	4855.95	3485.18	4706.21		F730311O21Rik	RIKEN cDNA F730311O21 gene [Source:MGI Symbol;Acc:MGI:3643355]	125.84	18.1745	2.82069	2.50109e-16	5.28884e-14	137.947	170.515	83.5396	111.358	15.4351	14.6231	23.9568	18.6829		Fcrl1	Fc receptor-like 1 [Source:MGI Symbol;Acc:MGI:2442862]
Sdc3	syndecan 3 [Source:MGI Symbol;Acc:MGI:1349163]	-1.47685	1554.82	4327.63	1.22782e-21	2.9205e-19	1508.84	1387.56	1843.23	1479.63	3771.94	5009.16	3316.91	5212.52		Gda	guanine deaminase [Source:MGI Symbol;Acc:MGI:95678]	1230.25	7531.96	-2.61441	5.45217e-123	1.51274e-120	1114.61	1327.53	1251.63	1227.22	8600.78	7385.18	6627.25	7514.64		1810059H22Rik	RIKEN cDNA 1810059H22 gene [Source:MGI Symbol;Acc:MGI:1917070]	180.571	27.6885	2.74216	3.67789e-16	7.69278e-14	151.572	248.38	159.893	162.44	28.2977	21.0207	44.7194	16.7163		Abca1	ATP-binding cassette, sub-family A (ABC1), member 1 [Source:MGI Symbol;Acc:MGI:99607]
Lef1	lymphoid enhancer binding factor 1 [Source:MGI Symbol;Acc:MGI:96770]	1.74399	418.401	124.492	1.29677e-21	3.05169e-19	434.858	465.956	325.648	447.141	141.037	136.956	99.141	120.835		Gbp4	guanylate binding protein 4 [Source:MGI Symbol;Acc:MGI:97072]	2332.37	24523.3	-3.39439	5.93723e-123	1.62961e-120	2301.45	1876.19	2414.65	2737.19	23579	20117.2	25605.2	28791.6		Dusp2	dual specificity phosphatase 2 [Source:MGI Symbol;Acc:MGI:101911]	751.796	236.262	1.67699	4.95982e-16	1.02626e-13	692.29	854.545	696.163	764.184	174.074	211.121	300.259	259.594		Ski	ski sarcoma viral oncogene homolog (avian) [Source:MGI Symbol;Acc:MGI:98310]
Bank1	B cell scaffold protein with ankyrin repeats 1 [Source:MGI Symbol;Acc:MGI:2442120]	1.77873	713.104	208.018	2.82991e-21	6.58952e-19	750.735	776.25	491.107	834.324	222.774	166.059	238.154	205.086		Igsf6	immunoglobulin superfamily, member 6 [Source:MGI Symbol;Acc:MGI:1891393]	481.325	4610.07	-3.26121	9.10249e-121	2.47181e-118	397.597	527.735	421.825	578.144	4991.96	4522.46	4136.75	4789.09		Rag1	recombination activating 1 [Source:MGI Symbol;Acc:MGI:97848]	949.071	180.863	2.38457	5.81434e-16	1.19027e-13	767.225	973.807	1050.98	1004.27	297.554	170.907	113.396	141.597		Kbtbd11	kelch repeat and BTB (POZ) domain containing 11 [Source:MGI Symbol;Acc:MGI:1922151]
Itgb3	integrin beta 3 [Source:MGI Symbol;Acc:MGI:96612]	1.32429	5309.17	2119.88	2.95358e-21	6.76588e-19	4934	5969.81	4519.02	5813.84	2495.39	1850.62	2366.45	1767.07		Socs1	suppressor of cytokine signaling 1 [Source:MGI Symbol;Acc:MGI:1354910]	241.24	2196.85	-3.18748	8.1516e-119	2.19029e-116	237.516	226.562	230.758	270.124	2451.51	2271.69	2280.52	1783.67		Neil1	nei endonuclease VIII-like 1 (E. coli) [Source:MGI Symbol;Acc:MGI:1920024]	484.304	171.812	1.49577	6.52424e-16	1.32154e-13	439.387	588.424	400.631	508.775	180.076	157.198	178.878	171.096		Chd7	chromodomain helicase DNA binding protein 7 [Source:MGI Symbol;Acc:MGI:2444748]
Gnaz	guanine nucleotide binding protein, alpha z subunit [Source:MGI Symbol;Acc:MGI:95780]	1.40383	376.399	142.073	2.96682e-21	6.76588e-19	331.671	375.239	396.258	402.426	146.646	146.372	142.246	133.029		Sema4a	sema domain, immunoglobulin domain (Ig), transmembrane domain (TM) and short cytoplasmic domain, (semaphorin) 4A [Source:MGI Symbol;Acc:MGI:107560]	1111.21	6006.51	-2.43491	1.20482e-118	3.20358e-116	989.526	1182.85	1166.71	1105.76	6265.11	6533.3	5780.85	5446.8		Pdilt	protein disulfide isomerase-like, testis expressed [Source:MGI Symbol;Acc:MGI:1919080]	0	94.5513	-9.1005	7.77543e-16	1.55857e-13	0	0	0	0	37.7302	137.091	81.4532	121.93		Slc28a2b	solute carrier family 28 member 2b [Source:MGI Symbol;Acc:MGI:3702173]
St6gal1	beta galactoside alpha 2,6 sialyltransferase 1 [Source:MGI Symbol;Acc:MGI:108470]	1.58477	1421.32	474.157	3.78626e-21	8.46019e-19	1459.35	1566.93	982.213	1676.78	460.774	433.123	442.902	559.83		Psmb8	proteasome (prosome, macropain) subunit, beta type 8 (large multifunctional peptidase 7) [Source:MGI Symbol;Acc:MGI:1346527]	1149.11	9868.95	-3.10292	2.24878e-118	5.91778e-116	1029.73	945.373	1221.17	1400.18	10536.2	10397.6	9506.31	9035.66		Cd209f	CD209f antigen [Source:MGI Symbol;Acc:MGI:1916392]	104.58	0.643129	7.09992	8.68011e-16	1.72197e-13	126.026	103.492	90.7258	98.0772	2.57252	0	0	0		Pax5	paired box 5 [Source:MGI Symbol;Acc:MGI:97489]
Procr	protein C receptor, endothelial [Source:MGI Symbol;Acc:MGI:104596]	-3.31455	39.9156	396.867	3.99742e-21	8.84269e-19	27.376	30.9263	77.9869	23.3733	263.643	469.93	298.501	555.396		Ccdc88b	coiled-coil domain containing 88B [Source:MGI Symbol;Acc:MGI:1925567]	772.115	5761.69	-2.90048	1.81433e-116	4.72577e-114	700.635	680.596	755.962	951.265	5551.3	6211.92	5372.8	5910.75		Mapk11	mitogen-activated protein kinase 11 [Source:MGI Symbol;Acc:MGI:1338024]	164.36	41.7681	1.96501	1.10735e-15	2.17437e-13	176.266	192.199	127.555	161.419	45.4478	47.525	36.7338	37.3658		Cpd	carboxypeptidase D [Source:MGI Symbol;Acc:MGI:107265]
Lgals3bp	lectin, galactoside-binding, soluble, 3 binding protein [Source:MGI Symbol;Acc:MGI:99554]	-1.33355	2024.28	5101.26	4.84396e-21	1.06092e-18	1836.3	1885.47	2488.2	1887.14	4875.39	5843.73	4042.15	5643.75		B2m	beta-2 microglobulin [Source:MGI Symbol;Acc:MGI:88127]	17980.8	112853	-2.64992	1.91043e-116	4.92583e-114	17365.5	15726.5	20589.1	18242.1	127957	114637	108365	100451		Cd8b1	CD8 antigen, beta chain 1 [Source:MGI Symbol;Acc:MGI:88347]	171.309	41.0672	2.05906	1.17294e-15	2.27989e-13	207.772	158.687	163.486	155.289	35.1577	55.7505	39.928	33.4325		Gimap1	GTPase, IMAP family member 1 [Source:MGI Symbol;Acc:MGI:109368]
Igkv16-104	immunoglobulin kappa variable 16-104 [Source:MGI Symbol;Acc:MGI:2685913]	-2.07731	173.098	730.698	4.95849e-21	1.07259e-18	127.404	204.114	202.344	158.532	575.367	855.118	534.5	957.808		Gm12250	predicted gene 12250 [Source:MGI Symbol;Acc:MGI:3649299]	170.869	4463.25	-4.70665	1.43364e-115	3.65951e-113	169.761	130.114	262.141	121.459	4962.71	4598.41	4347.81	3944.09		Ralgps2	Ral GEF with PH domain and SH3 binding motif 2 [Source:MGI Symbol;Acc:MGI:1925505]	1212.72	528.148	1.19896	1.35134e-15	2.60038e-13	1205.76	1370.03	1116.56	1158.54	603.684	508.152	536.633	464.122		Gpr132	G protein-coupled receptor 132 [Source:MGI Symbol;Acc:MGI:1890220]
Fcgr1	Fc receptor, IgG, high affinity I [Source:MGI Symbol;Acc:MGI:95498]	-2.05591	475.419	1976.67	4.99421e-21	1.07259e-18	407.482	378.332	740.876	374.988	1647.57	2238.37	1584.1	2436.65		Ly6a	lymphocyte antigen 6 complex, locus A [Source:MGI Symbol;Acc:MGI:107527]	3686.15	28248	-2.93782	4.81697e-115	1.21741e-112	4217.96	2947.13	3770.58	3808.95	32400.9	27274.6	27826.2	25490.2		4930426D05Rik	RIKEN cDNA 4930426D05 gene [Source:MGI Symbol;Acc:MGI:1921894]	215.216	10.4152	4.44486	1.55718e-15	2.96681e-13	182.227	380.455	157.198	140.986	2.57252	12.7952	22.3597	3.93324		Fpr2	formyl peptide receptor 2 [Source:MGI Symbol;Acc:MGI:1278319]
Gm37065	predicted gene, 37065 [Source:MGI Symbol;Acc:MGI:5610293]	4.77281	95.9449	3.45737	1.02892e-20	2.18854e-18	120.033	93.8098	63.2326	106.704	4.00673	4.27987	0	5.54287		H2-K1	histocompatibility 2, K1, K region [Source:MGI Symbol;Acc:MGI:95904]	16411	120561	-2.87707	5.69282e-115	1.42466e-112	15039.5	13602.8	19095.7	17905.9	131654	125325	116883	108384		Ubd	ubiquitin D [Source:MGI Symbol;Acc:MGI:1344410]	151.813	1460.02	-3.26515	2.13695e-15	4.03151e-13	154.126	201.069	98.8102	153.246	527.366	1391.02	2612.89	1308.79		Xkrx	X-linked Kx blood group related, X-linked [Source:MGI Symbol;Acc:MGI:3584011]
Arl5c	ADP-ribosylation factor-like 5C [Source:MGI Symbol;Acc:MGI:3028577]	1.67207	1908.38	598.784	1.34957e-20	2.84321e-18	1973.18	2067.94	1309.97	2282.45	547.32	706.178	469.842	671.796		Cd4	CD4 antigen [Source:MGI Symbol;Acc:MGI:88335]	340.555	3652.25	-3.42368	7.50911e-115	1.86095e-112	297.826	354.856	383.058	326.481	4281.67	4032.69	2888.8	3405.86		Gbp6	guanylate binding protein 6 [Source:MGI Symbol;Acc:MGI:2140937]	35.8789	368.273	-3.36501	2.20053e-15	4.11115e-13	13.6244	37.4541	48.5068	43.9304	340.43	542.881	170.892	418.89		Fcer2a	Fc receptor, IgE, low affinity II, alpha polypeptide [Source:MGI Symbol;Acc:MGI:95497]
Irf4	interferon regulatory factor 4 [Source:MGI Symbol;Acc:MGI:1096873]	1.94026	2107.17	549.267	1.62382e-20	3.38873e-18	2023.72	2659.66	1237.25	2508.05	571.36	439.971	671.357	514.378		Mgl2	macrophage galactose N-acetyl-galactosamine specific lectin 2 [Source:MGI Symbol;Acc:MGI:2385729]	1322.06	26.308	5.65203	8.36941e-115	2.05421e-112	1086.32	1403.05	1650.38	1148.51	28.0842	23.1131	38.9647	15.0702		Casp12	caspase 12 [Source:MGI Symbol;Acc:MGI:1312922]	31.4164	139.396	-2.15179	2.75687e-15	5.10101e-13	29.8034	36.4685	28.7448	30.6491	120.908	117.899	130.964	187.812		Ankrd44	ankyrin repeat domain 44 [Source:MGI Symbol;Acc:MGI:3045243]
Gp6	glycoprotein 6 (platelet) [Source:MGI Symbol;Acc:MGI:1889810]	1.84646	392.728	109.419	1.79502e-20	3.71099e-18	342.2	466.987	300.355	461.368	112.99	90.7332	114.228	119.726		Tmsb10	thymosin, beta 10 [Source:MGI Symbol;Acc:MGI:109146]	3408.81	15407.7	-2.17603	1.12642e-114	2.73839e-112	3828.55	3085.43	3406.91	3314.37	16247.9	15306.4	14497	15579.4		Irgm1	immunity-related GTPase family M member 1 [Source:MGI Symbol;Acc:MGI:107567]	1964.34	5066.88	-1.36708	3.27569e-15	6.00325e-13	2155.21	1873.69	1931.29	1897.18	4069.72	6345.5	4647.62	5204.66		Lef1	lymphoid enhancer binding factor 1 [Source:MGI Symbol;Acc:MGI:96770]
Chst10	carbohydrate sulfotransferase 10 [Source:MGI Symbol;Acc:MGI:2138283]	2.27576	481.935	99.1514	3.04127e-20	6.22925e-18	554.891	484.512	345.672	542.666	146.646	82.1735	63.5796	104.206		Clcn7	chloride channel, voltage-sensitive 7 [Source:MGI Symbol;Acc:MGI:1347048]	1482.22	7132.51	-2.26674	1.49743e-114	3.60598e-112	1420.63	1477.66	1623.61	1406.98	7685.7	7146.35	6357.74	7340.26		Tcam1	testicular cell adhesion molecule 1 [Source:MGI Symbol;Acc:MGI:1923120]	29.1118	155.054	-2.40852	3.52288e-15	6.39535e-13	42.5763	25.6265	20.6603	27.5842	120.908	201.067	151.727	146.513		Madd	MAP-kinase activating death domain [Source:MGI Symbol;Acc:MGI:2444672]
Vwf	Von Willebrand factor [Source:MGI Symbol;Acc:MGI:98941]	1.5256	1978.82	686.928	3.40277e-20	6.84298e-18	1667.83	2245.25	1629.29	2372.89	821.38	638.557	746.791	540.984		Ms4a6c	membrane-spanning 4-domains, subfamily A, member 6C [Source:MGI Symbol;Acc:MGI:2385644]	377.049	3465.67	-3.20191	3.54114e-114	8.44778e-112	308.25	414.909	388.596	396.441	3653.28	3582.53	2813.04	3813.84		Bmf	BCL2 modifying factor [Source:MGI Symbol;Acc:MGI:2176433]	448.285	138.644	1.6868	5.129e-15	9.22404e-13	374.671	599.266	417.698	401.503	151.778	141.661	116.59	144.547		Fam43a	family with sequence similarity 43, member A [Source:MGI Symbol;Acc:MGI:2676309]
Mertk	MER proto-oncogene tyrosine kinase [Source:MGI Symbol;Acc:MGI:96965]	-2.44725	162.67	886.977	4.46859e-20	8.82586e-18	149.515	122.674	268.739	109.753	649.892	1054.56	698.298	1145.16		Nlrc5	NLR family, CARD domain containing 5 [Source:MGI Symbol;Acc:MGI:3612191]	889.185	9074.18	-3.35218	5.54323e-114	1.31015e-111	689.466	754.297	1058.72	1054.26	9071.19	9368.51	8859.06	8997.98		Fos	FBJ osteosarcoma oncogene [Source:MGI Symbol;Acc:MGI:95574]	1065.11	239.265	2.15398	6.56848e-15	1.17034e-12	1360.74	1377.92	620.708	901.084	219.521	286.064	233.18	218.295		Mycbp2	MYC binding protein 2, E3 ubiquitin protein ligase [Source:MGI Symbol;Acc:MGI:2179432]
Blnk	B cell linker [Source:MGI Symbol;Acc:MGI:96878]	1.74559	1503.36	448.067	4.61174e-20	9.02799e-18	1693.1	1637.03	1008.56	1674.74	473.596	500.745	315.743	502.184		Gsap	gamma-secretase activating protein [Source:MGI Symbol;Acc:MGI:2442259]	348.98	2573.15	-2.88235	1.3987e-113	3.27553e-111	330.587	427.647	326.753	310.934	2737.04	2624.99	2452.61	2477.97		Spic	Spi-C transcription factor (Spi-1/PU.1 related) [Source:MGI Symbol;Acc:MGI:1341168]	329.05	755.818	-1.19858	7.06325e-15	1.24696e-12	345.719	313.432	318.888	338.162	617.404	807.011	790.575	808.281		Tnfaip2	tumor necrosis factor, alpha-induced protein 2 [Source:MGI Symbol;Acc:MGI:104960]
Ly6c1	lymphocyte antigen 6 complex, locus C1 [Source:MGI Symbol;Acc:MGI:96882]	-2.90815	72.9394	547.335	4.87196e-20	9.45374e-18	100.028	55.6674	82.2024	53.8601	342.976	760.961	304.966	780.436		Hcls1	hematopoietic cell specific Lyn substrate 1 [Source:MGI Symbol;Acc:MGI:104568]	1573.22	10504	-2.73937	3.1939e-113	7.41158e-111	1417.65	1643.26	1674.38	1557.59	12211.9	11202.1	9435.96	9165.91		Gbp2b	guanylate binding protein 2b [Source:MGI Symbol;Acc:MGI:95666]	9.10564	186.744	-4.37058	8.65292e-15	1.51371e-12	6.81221	21.684	1.79655	6.12982	126.911	296.117	108.604	215.345		Dtx1	deltex 1, E3 ubiquitin ligase [Source:MGI Symbol;Acc:MGI:1352744]
Reln	reelin [Source:MGI Symbol;Acc:MGI:103022]	1.53438	761.909	262.801	5.58054e-20	1.07345e-17	827.599	896.863	570.147	753.025	291.69	253.368	286.647	219.498		Hrh2	histamine receptor H2 [Source:MGI Symbol;Acc:MGI:108482]	123.116	1053.87	-3.09833	5.40547e-113	1.24306e-110	124.342	116.466	110.764	140.892	1083.58	1057.7	969.788	1104.43		S1pr5	sphingosine-1-phosphate receptor 5 [Source:MGI Symbol;Acc:MGI:2150641]	91.0478	7.40745	3.50973	1.25021e-14	2.16737e-12	102.183	91.664	76.3534	93.9906	15.4351	7.31154	0	6.88317		Pik3ip1	phosphoinositide-3-kinase interacting protein 1 [Source:MGI Symbol;Acc:MGI:1917016]
Scd1	stearoyl-Coenzyme A desaturase 1 [Source:MGI Symbol;Acc:MGI:98239]	1.65705	2451.12	776.814	6.04778e-20	1.1533e-17	3059.8	2511.22	1759.97	2473.5	722.815	1022.03	618.554	743.853		Cers6	ceramide synthase 6 [Source:MGI Symbol;Acc:MGI:2442564]	566.554	3774.42	-2.73691	6.30576e-113	1.43715e-110	480.989	648.75	597.201	539.277	4124.86	3813.66	3497.08	3662.06		Ces1d	carboxylesterase 1D [Source:MGI Symbol;Acc:MGI:2148202]	127.287	18.6774	2.82253	1.41606e-14	2.43297e-12	108.995	137.003	122.165	140.986	19.7226	7.31154	31.9424	15.733		Ifi214	interferon activated gene 214 [Source:MGI Symbol;Acc:MGI:3584522]
C1ra	complement component 1, r subcomponent A [Source:MGI Symbol;Acc:MGI:1355313]	-1.78364	347.949	1198.25	6.38203e-20	1.20664e-17	330.618	315.448	421.551	324.177	869.461	1363.57	955.849	1604.11		C1qb	complement component 1, q subcomponent, beta polypeptide [Source:MGI Symbol;Acc:MGI:88224]	2871.73	29553.5	-3.36336	3.45709e-112	7.80935e-110	2678.94	2762.42	3598.9	2446.66	35672.7	30608.3	25247	26686.1		Khdrbs3	KH domain containing, RNA binding, signal transduction associated 3 [Source:MGI Symbol;Acc:MGI:1313312]	246.198	94.8567	1.38175	1.59447e-14	2.71526e-12	281.004	222.753	231.755	249.279	92.6106	94.136	102.216	90.4645		Aff3	AF4/FMR2 family, member 3 [Source:MGI Symbol;Acc:MGI:106927]
Akap12	A kinase (PRKA) anchor protein (gravin) 12 [Source:MGI Symbol;Acc:MGI:1932576]	1.96023	2244.17	576.65	8.30031e-20	1.54478e-17	2261.68	2716.36	1274.14	2724.51	584.983	624.005	420.272	677.339		Fabp5	fatty acid binding protein 5, epidermal [Source:MGI Symbol;Acc:MGI:101790]	198.405	5307.95	-4.74138	6.32264e-112	1.41572e-109	221.136	171.969	143.993	256.521	7363.9	5044.16	3964.66	4859.06		Parp12	poly (ADP-ribose) polymerase family, member 12 [Source:MGI Symbol;Acc:MGI:2143990]	638.493	1360.59	-1.09187	1.96562e-14	3.31792e-12	652.269	593.352	716.823	591.528	1328.28	1539.99	1237.77	1336.32		Neurl3	neuralized E3 ubiquitin protein ligase 3 [Source:MGI Symbol;Acc:MGI:2429944]
Spp1	secreted phosphoprotein 1 [Source:MGI Symbol;Acc:MGI:98389]	-1.9017	1396.62	5218.39	8.31015e-20	1.54478e-17	2015.3	979.333	1577.65	1014.2	4048.4	5814.63	4934.42	6076.09		Sh3bp2	SH3-domain binding protein 2 [Source:MGI Symbol;Acc:MGI:1346349]	413.821	3149.53	-2.92989	1.22357e-111	2.7159e-109	345.478	400.351	443.055	466.402	3102.13	3606.74	2964.57	2924.69		Klrk1	killer cell lectin-like receptor subfamily K, member 1 [Source:MGI Symbol;Acc:MGI:1196250]	233.567	514.72	-1.14055	2.434e-14	4.07283e-12	223.1	224.725	214.688	271.755	482.776	541.054	528.647	506.405		Junb	jun B proto-oncogene [Source:MGI Symbol;Acc:MGI:96647]
Gvin2	GTPase, very large interferon inducible, family member 2 [Source:MGI Symbol;Acc:MGI:3782245]	-1.65811	241.47	761.883	1.03159e-19	1.90164e-17	202.161	246.38	315.109	202.229	631.461	946.707	754.334	715.03		Cd3e	CD3 antigen, epsilon polypeptide [Source:MGI Symbol;Acc:MGI:88332]	82.8871	1334.85	-4.00555	5.78202e-110	1.27234e-107	95.3042	84.6195	72.9195	78.7053	1553.99	1528.77	1062.87	1193.77		Cd2	CD2 antigen [Source:MGI Symbol;Acc:MGI:88320]	522.566	160.804	1.68995	2.54127e-14	4.21566e-12	478.557	604.194	459.917	547.597	169.786	182.788	103.813	186.829		Cmpk2	cytidine monophosphate (UMP-CMP) kinase 2, mitochondrial [Source:MGI Symbol;Acc:MGI:99830]
Anpep	alanyl (membrane) aminopeptidase [Source:MGI Symbol;Acc:MGI:5000466]	-2.2549	169.372	808.533	1.17973e-19	2.15676e-17	164.256	140.199	229.745	143.288	480.808	1003.2	667.047	1083.08		Gvin3	GTPase, very large interferon inducible, family member 3 [Source:MGI Symbol;Acc:MGI:3584360]	780.219	5002.38	-2.68099	2.42868e-109	5.29867e-107	719.249	884.411	747.655	769.563	5337.16	5610.98	4708.24	4353.13		Klk1	kallikrein 1 [Source:MGI Symbol;Acc:MGI:102850]	218.705	68.7513	1.67079	3.11005e-14	5.1151e-12	235.873	226.696	189.536	222.717	50.5928	77.6851	67.0791	79.6481		Il4ra	interleukin 4 receptor, alpha [Source:MGI Symbol;Acc:MGI:105367]
Gm13919	predicted gene 13919 [Source:MGI Symbol;Acc:MGI:3651616]	2.52191	243.082	42.5814	1.20536e-19	2.18556e-17	274.813	273.182	158.082	266.252	44.8754	24.8232	47.4153	53.2116		Hpse	heparanase [Source:MGI Symbol;Acc:MGI:1343124]	174.393	2906.5	-4.05994	2.99686e-109	6.48288e-107	166.038	121.015	212.297	198.221	3483.61	3063.04	2687.48	2391.86		Cd79b	CD79B antigen [Source:MGI Symbol;Acc:MGI:96431]	4221.85	831.726	2.34602	3.9103e-14	6.37676e-12	3595.14	5355.94	3881.45	4054.88	647.417	556.591	1445.39	677.501		Rel	reticuloendotheliosis oncogene [Source:MGI Symbol;Acc:MGI:97897]
Il21	interleukin 21 [Source:MGI Symbol;Acc:MGI:1890474]	-5.58081	2.36547	112.264	1.9041e-19	3.42022e-17	0	1.03088	8.43102	0	82.5387	118.98	104.529	143.006		Clec4d	C-type lectin domain family 4, member d [Source:MGI Symbol;Acc:MGI:1298389]	98.9396	2326.33	-4.55851	5.06687e-108	1.08687e-105	76.6901	101.907	119.994	97.167	2912.56	1973.42	1676.57	2742.78		Iglc3	immunoglobulin lambda constant 3 [Source:MGI Symbol;Acc:MGI:99886]	616.811	172.846	1.83673	4.43874e-14	7.17771e-12	495.588	915.655	530.88	525.121	162.069	161.768	183.669	183.879		Irf2bpl	interferon regulatory factor 2 binding protein-like [Source:MGI Symbol;Acc:MGI:2442463]
Mmp14	matrix metallopeptidase 14 (membrane-inserted) [Source:MGI Symbol;Acc:MGI:101900]	-1.86345	645.91	2350.4	1.91722e-19	3.42022e-17	609.643	576.26	893.688	504.049	1644.36	2775.92	1989.29	2992.04		Pfn1	profilin 1 [Source:MGI Symbol;Acc:MGI:97549]	6282.94	28208.4	-2.16661	1.81459e-107	3.85994e-105	6263.27	5859.68	6710.44	6298.36	30733.4	30302.4	26115	25682.8		Ace	angiotensin I converting enzyme (peptidyl-dipeptidase A) 1 [Source:MGI Symbol;Acc:MGI:87874]	367.939	44.44	3.02439	4.85728e-14	7.78905e-12	346.571	406.082	343.141	375.962	78.8905	36.5577	11.1798	51.1321		Macf1	microtubule-actin crosslinking factor 1 [Source:MGI Symbol;Acc:MGI:108559]
Cmklr1	chemokine-like receptor 1 [Source:MGI Symbol;Acc:MGI:109603]	-2.22822	123.679	579.495	2.08114e-19	3.68295e-17	175.838	101.026	124.357	93.493	395.865	694.195	476.308	751.613		Zap70	zeta-chain (TCR) associated protein kinase [Source:MGI Symbol;Acc:MGI:99613]	135.463	1850.86	-3.77447	2.12524e-107	4.48338e-105	120.619	115.556	155.069	150.609	2073.55	1927.19	1391.91	2010.79		Gpr183	G protein-coupled receptor 183 [Source:MGI Symbol;Acc:MGI:2442034]	257.738	80.8086	1.66684	5.00553e-14	7.96045e-12	240.982	254.294	228.162	307.513	84.893	65.8038	70.2733	102.264		Itpr2	inositol 1,4,5-triphosphate receptor 2 [Source:MGI Symbol;Acc:MGI:99418]
Pde3a	phosphodiesterase 3A, cGMP inhibited [Source:MGI Symbol;Acc:MGI:1860764]	1.83959	334.77	93.5781	2.22802e-19	3.91158e-17	253.755	407.196	292.978	385.151	99.367	83.8854	102.374	88.6859		Pfkfb3	6-phosphofructo-2-kinase/fructose-2,6-biphosphatase 3 [Source:MGI Symbol;Acc:MGI:2181202]	1107.05	5937.29	-2.4226	8.7089e-107	1.82216e-104	1188.32	1099.14	1103.95	1036.77	6728.5	5431.58	5340.33	6248.75		H2-Q4	histocompatibility 2, Q region locus 4 [Source:MGI Symbol;Acc:MGI:95933]	2794.4	7740.52	-1.46982	6.2152e-14	9.80321e-12	2989.71	3558.14	2129.81	2499.95	6620.8	7733.78	8528.63	8078.87		Vamp5	vesicle-associated membrane protein 5 [Source:MGI Symbol;Acc:MGI:1858622]
Cxcr5	chemokine (C-X-C motif) receptor 5 [Source:MGI Symbol;Acc:MGI:103567]	2.3666	346.281	67.6774	2.56222e-19	4.4629e-17	382.212	334.004	262.415	406.491	52.0875	41.9427	101.296	75.383		Clec12a	C-type lectin domain family 12, member a [Source:MGI Symbol;Acc:MGI:3040968]	564.624	6302.1	-3.48191	7.20394e-106	1.49502e-103	403.554	632.372	567.664	654.905	7100.61	6370.41	5292.71	6444.66		Gm12057	predicted gene 12057 [Source:MGI Symbol;Acc:MGI:3650030]	72.0705	11.3011	2.63394	6.91028e-14	1.08109e-11	58.7553	68.9944	80.8447	79.6877	15.4351	10.9673	7.98561	10.8164		Cd19	CD19 antigen [Source:MGI Symbol;Acc:MGI:88319]
Mtss1	MTSS I-BAR domain containing 1 [Source:MGI Symbol;Acc:MGI:2384818]	1.2998	1798.04	730.602	2.81211e-19	4.8599e-17	1780.5	2022.58	1336.32	2052.78	658.707	756.681	794.206	712.813		Nampt	nicotinamide phosphoribosyltransferase [Source:MGI Symbol;Acc:MGI:1929865]	1640.49	9709.98	-2.56541	1.58359e-105	3.2599e-103	1623.89	1444.9	1751.91	1741.23	11269.9	8789.58	8813.6	9966.78		S1pr1	sphingosine-1-phosphate receptor 1 [Source:MGI Symbol;Acc:MGI:1096355]	499.08	137.831	1.85684	7.1613e-14	1.11133e-11	389.147	638.691	468.899	499.58	168.929	139.833	150.129	92.4311		Mllt6	myeloid/lymphoid or mixed-lineage leukemia; translocated to, 6 [Source:MGI Symbol;Acc:MGI:1935145]
Klrb1c	killer cell lectin-like receptor subfamily B member 1C [Source:MGI Symbol;Acc:MGI:107538]	1.98281	219.19	55.2535	3.26241e-19	5.5944e-17	271.654	201.021	217.099	186.986	52.8889	67.6219	51.7258	48.7773		Lst1	leukocyte specific transcript 1 [Source:MGI Symbol;Acc:MGI:1096324]	117.261	1368.18	-3.54367	2.08549e-105	4.25874e-103	121.364	129.204	95.0722	123.402	1645.26	1385.69	1253.37	1188.39		Batf2	basic leucine zipper transcription factor, ATF-like 2 [Source:MGI Symbol;Acc:MGI:1921731]	23.1176	157.071	-2.77288	7.76488e-14	1.19536e-11	19.5851	24.6409	20.6603	27.5842	108.903	249.506	95.8273	174.046		Lap3	leucine aminopeptidase 3 [Source:MGI Symbol;Acc:MGI:1914238]
Parp12	poly (ADP-ribose) polymerase family, member 12 [Source:MGI Symbol;Acc:MGI:2143990]	-1.3954	882.193	2320.82	3.50527e-19	5.96462e-17	816.016	832.949	1074.95	804.853	1975.32	2599.59	1882.6	2825.76		Ltbp4	latent transforming growth factor beta binding protein 4 [Source:MGI Symbol;Acc:MGI:1321395]	22115.9	3247.48	2.76765	2.16458e-105	4.38515e-103	22062.2	18178.6	23625	24597.8	3107.98	3322.78	2834.68	3724.49		Atp1b1	ATPase, Na+/K+ transporting, beta 1 polypeptide [Source:MGI Symbol;Acc:MGI:88108]	1557.73	321.903	2.2698	1.09162e-13	1.66714e-11	1542.96	1618.41	1513.59	1555.95	452.763	345.47	137.352	352.025		Gpr183	G protein-coupled receptor 183 [Source:MGI Symbol;Acc:MGI:2442034]
Ccl2	chemokine (C-C motif) ligand 2 [Source:MGI Symbol;Acc:MGI:98259]	-3.59894	22.1981	268.666	4.15476e-19	7.01584e-17	12.6351	19.5867	47.4245	9.14606	187.515	302.159	204.748	380.241		Lck	lymphocyte protein tyrosine kinase [Source:MGI Symbol;Acc:MGI:96756]	209.285	2752.93	-3.71723	2.28978e-105	4.60228e-103	196.565	236.571	243.68	160.326	3241.38	3005.8	2203.67	2560.86		ENSMUSG00000120970	novel transcript	99.5981	22.6092	2.10517	1.42422e-13	2.15798e-11	90.2617	101.52	102.403	104.207	27.4402	20.1067	14.3741	28.516		Tec	tec protein tyrosine kinase [Source:MGI Symbol;Acc:MGI:98662]
Sowaha	sosondowah ankyrin repeat domain family member A [Source:MGI Symbol;Acc:MGI:2687280]	1.30781	1551.22	625.994	5.24755e-19	8.79402e-17	1703.63	1609.2	1276.25	1615.8	766.889	579.494	647.65	509.944		Csf2rb	colony stimulating factor 2 receptor, beta, low-affinity (granulocyte-macrophage) [Source:MGI Symbol;Acc:MGI:1339759]	1028.81	7633.41	-2.89216	4.23193e-105	8.4394e-103	830.934	1050.01	1061.49	1172.81	8170.15	8522.13	7180.33	6661.03		Gm4951	predicted gene 4951 [Source:MGI Symbol;Acc:MGI:3644953]	31.5211	521.883	-4.05377	1.66112e-13	2.49726e-11	12.7729	21.684	39.5241	52.1035	623.407	806.097	105.41	552.62		Prkd2	protein kinase D2 [Source:MGI Symbol;Acc:MGI:2141917]
Srpk3	serine/arginine-rich protein specific kinase 3 [Source:MGI Symbol;Acc:MGI:1891338]	2.92149	429.623	56.9095	5.98894e-19	9.96101e-17	443.281	518.531	244.499	512.179	32.8552	69.3339	32.3286	93.1202		Mpeg1	macrophage expressed gene 1 [Source:MGI Symbol;Acc:MGI:1333743]	4255.28	40744	-3.25937	8.07216e-105	1.59729e-102	3459.25	4349.26	5288.05	3924.57	47956.1	43121.3	36987.3	34911.2		Tmem132e	transmembrane protein 132E [Source:MGI Symbol;Acc:MGI:2685490]	84.3138	18.4174	2.1806	1.94754e-13	2.90516e-11	71.5282	86.7359	95.2171	83.7742	17.1501	22.8485	15.9712	17.6996		Hsp90aa1	heat shock protein 90, alpha (cytosolic), class A member 1 [Source:MGI Symbol;Acc:MGI:96250]
Gp1ba	glycoprotein 1b, alpha polypeptide [Source:MGI Symbol;Acc:MGI:1333744]	1.9783	634.487	160.484	1.39616e-18	2.27091e-16	504.351	789.652	514.292	729.652	222.774	157.499	153.022	108.64		Fermt3	fermitin family member 3 [Source:MGI Symbol;Acc:MGI:2147790]	1186.38	7840.41	-2.72486	1.37885e-103	2.70742e-101	982.08	1369.38	1256.25	1137.83	8295.36	8438.48	6902.17	7725.63		Calhm6	calcium homeostasis modulator family member 6 [Source:MGI Symbol;Acc:MGI:2443082]	116.088	625.423	-2.42701	2.17506e-13	3.21959e-11	126.026	119.262	115.877	103.185	280.404	666.264	950.287	604.736		Il27ra	interleukin 27 receptor, alpha [Source:MGI Symbol;Acc:MGI:1355318]
Rab27b	RAB27B, member RAS oncogene family [Source:MGI Symbol;Acc:MGI:1931295]	1.22927	700.89	299.601	1.48183e-18	2.39267e-16	703.353	778.312	591.225	730.668	270.855	274.768	314.665	338.115		Smpdl3b	sphingomyelin phosphodiesterase, acid-like 3B [Source:MGI Symbol;Acc:MGI:1916022]	104.676	1708.42	-4.03191	4.69201e-103	9.14262e-101	96.0488	69.1515	112.61	140.892	1887.49	1547.48	1648.42	1750.3		Cacna1g	calcium channel, voltage-dependent, T type, alpha 1G subunit [Source:MGI Symbol;Acc:MGI:1201678]	771.752	190.469	2.01287	2.23464e-13	3.28254e-11	810.653	808.221	669.215	798.92	288.122	129.78	132.561	211.412		Ighv5-17	immunoglobulin heavy variable 5-17 [Source:MGI Symbol;Acc:MGI:4439533]
Gbp9	guanylate-binding protein 9 [Source:MGI Symbol;Acc:MGI:3605620]	-1.17253	958.731	2161.27	2.10535e-18	3.31848e-16	908.674	960.777	998.022	967.449	1813.45	2502.01	1830.88	2498.73		Themis	thymocyte selection associated [Source:MGI Symbol;Acc:MGI:2443552]	27.5401	606.194	-4.46904	8.89544e-103	1.72019e-100	23.0815	25.4769	29.537	32.0651	686.892	624.054	539.012	574.82		Fcgr1	Fc receptor, IgG, high affinity I [Source:MGI Symbol;Acc:MGI:95498]	370.839	859.177	-1.21347	2.37204e-13	3.45796e-11	325.283	376.512	423.986	357.573	784.618	983.401	752.244	916.445		Zfp36l1	zinc finger protein 36, C3H type-like 1 [Source:MGI Symbol;Acc:MGI:107946]
Polm	polymerase (DNA directed), mu [Source:MGI Symbol;Acc:MGI:1860191]	1.35616	1276.37	498.612	2.10953e-18	3.31848e-16	1224.55	1464.88	923.196	1492.84	472.795	532.416	488.162	501.075		Parvg	parvin, gamma [Source:MGI Symbol;Acc:MGI:2158329]	443.508	2879.38	-2.69959	1.0982e-102	2.10771e-100	389.407	460.403	513.205	411.016	3028.41	3136.78	2608.47	2743.85		Trafd1	TRAF type zinc finger domain containing 1 [Source:MGI Symbol;Acc:MGI:1923551]	2171.83	4761.94	-1.13226	2.96654e-13	4.29211e-11	2179.05	2412.83	1966.32	2129.09	3977.97	4731.48	5628.26	4710.05		Parp12	poly (ADP-ribose) polymerase family, member 12 [Source:MGI Symbol;Acc:MGI:2143990]
Miat	myocardial infarction associated transcript (non-protein coding) [Source:MGI Symbol;Acc:MGI:2444886]	-3.58858	8.26903	99.5743	2.11521e-18	3.31848e-16	4.2117	10.3088	7.37714	11.1785	107.38	119.836	64.6572	106.423		Ifng	interferon gamma [Source:MGI Symbol;Acc:MGI:107656]	14.3114	671.84	-5.52776	2.21325e-102	4.21608e-100	20.8478	12.7384	11.9994	11.66	732.529	648.267	547.671	758.892		Il18bp	interleukin 18 binding protein [Source:MGI Symbol;Acc:MGI:1333800]	232.913	772.229	-1.73077	6.36665e-13	9.1428e-11	232.467	299.633	177.858	221.695	625.122	997.111	618.086	848.596		Foxo1	forkhead box O1 [Source:MGI Symbol;Acc:MGI:1890077]
Slc12a3	solute carrier family 12, member 3 [Source:MGI Symbol;Acc:MGI:108114]	3.53095	252.742	21.9487	2.41983e-18	3.76964e-16	230.59	319.572	98.0106	362.794	27.2458	11.1277	16.1643	33.2572		Iigp1	interferon inducible GTPase 1 [Source:MGI Symbol;Acc:MGI:1926259]	1701.53	23804.8	-3.80639	1.10748e-101	2.09404e-99	1716.22	1082.77	2176.51	1830.63	26195.5	22826.9	24665.7	21531		Cbr2	carbonyl reductase 2 [Source:MGI Symbol;Acc:MGI:107200]	99.2589	10.4897	3.17902	1.02454e-12	1.46039e-10	123.471	64.0663	118.572	90.9257	19.7226	8.22548	3.19424	10.8164		Nsg2	neuron specific gene family member 2 [Source:MGI Symbol;Acc:MGI:1202070]
Slc6a4	solute carrier family 6 (neurotransmitter transporter, serotonin), member 4 [Source:MGI Symbol;Acc:MGI:96285]	1.77821	370.08	107.45	2.54457e-18	3.93626e-16	321.142	391.733	318.271	449.173	140.236	101.861	103.452	84.2516		Gm36161	predicted gene, 36161 [Source:MGI Symbol;Acc:MGI:5595320]	119.965	1389.26	-3.53556	2.04031e-101	3.82948e-99	109.451	132.844	101.533	136.034	1700.26	1311.94	1208.99	1335.87		Dusp5	dual specificity phosphatase 5 [Source:MGI Symbol;Acc:MGI:2685183]	322.385	131.564	1.29755	1.1098e-12	1.57028e-10	283.558	349.9	303.617	352.465	111.476	126.124	142.144	146.513		Gpr174	G protein-coupled receptor 174 [Source:MGI Symbol;Acc:MGI:2685222]
Tubb1	tubulin, beta 1 class VI [Source:MGI Symbol;Acc:MGI:107814]	1.58107	1235.97	412.62	2.88379e-18	4.43002e-16	1163.48	1355.6	969.567	1455.24	528.087	375.773	443.979	302.641		Fyb	FYN binding protein [Source:MGI Symbol;Acc:MGI:1346327]	1132.31	9734.27	-3.10437	4.61552e-101	8.59969e-99	889.01	1362.1	1096.56	1181.55	11206.8	9990.36	8317.88	9422.1		Ibsp	integrin binding sialoprotein [Source:MGI Symbol;Acc:MGI:96389]	802.762	162.031	2.30294	1.15678e-12	1.62481e-10	709.321	894.956	790.482	816.288	288.979	101.448	110.201	147.496		Sptbn1	spectrin beta, non-erythrocytic 1 [Source:MGI Symbol;Acc:MGI:98388]
Icos	inducible T cell co-stimulator [Source:MGI Symbol;Acc:MGI:1858745]	-2.57647	73.1115	435.956	2.93614e-18	4.47933e-16	113.716	54.6365	88.5257	35.568	325.347	426.275	423.505	568.698		Gpnmb	glycoprotein (transmembrane) nmb [Source:MGI Symbol;Acc:MGI:1934765]	210.597	3302.43	-3.97128	4.82157e-101	8.9185e-99	201.777	217.463	212.297	210.852	3881.47	2797.79	2310.82	4219.65		Stambpl1	STAM binding protein like 1 [Source:MGI Symbol;Acc:MGI:1923880]	1003.45	444.286	1.17919	1.20415e-12	1.67909e-10	1078.03	991.549	959.358	984.858	439.9	347.298	523.856	466.089		Cd79a	CD79A antigen (immunoglobulin-associated alpha) [Source:MGI Symbol;Acc:MGI:101774]
Cavin2	caveolae associated 2 [Source:MGI Symbol;Acc:MGI:99513]	1.04439	1078.2	522.276	3.41598e-18	5.17568e-16	1057.14	1110.25	943.22	1202.2	528.889	582.062	488.162	489.99		Il2rb	interleukin 2 receptor, beta chain [Source:MGI Symbol;Acc:MGI:96550]	451.423	4238.63	-3.23164	5.60082e-101	1.02854e-98	403.554	394.891	578.741	428.506	4692.4	4574.19	3545.79	4142.15		Trib2	tribbles pseudokinase 2 [Source:MGI Symbol;Acc:MGI:2145021]	515.364	233.828	1.14477	1.44207e-12	1.99638e-10	487.924	561.812	511.118	500.602	195.511	222.088	257.137	260.577		Tlr1	toll-like receptor 1 [Source:MGI Symbol;Acc:MGI:1341295]
Cxcr6	chemokine (C-X-C motif) receptor 6 [Source:MGI Symbol;Acc:MGI:1934582]	-2.04891	92.1043	381.385	4.38692e-18	6.60157e-16	129.51	70.0996	88.5257	80.282	273.259	380.908	384.71	486.664		Trafd1	TRAF type zinc finger domain containing 1 [Source:MGI Symbol;Acc:MGI:1923551]	3337.91	11195.8	-1.74621	3.28776e-100	5.99453e-98	3069.09	3426.64	3359.83	3496.07	11220.8	11518	10619	11425.4		Fam169b	family with sequence similarity 169, member B [Source:MGI Symbol;Acc:MGI:3644026]	162.746	44.9791	1.83366	1.49305e-12	2.05219e-10	122.62	182.342	173.367	172.657	48.8778	46.611	30.3453	54.082		Gimap5	GTPase, IMAP family member 5 [Source:MGI Symbol;Acc:MGI:2442232]
Rhoh	ras homolog family member H [Source:MGI Symbol;Acc:MGI:1921984]	1.09834	1121.54	524.096	4.52128e-18	6.75778e-16	1263.51	1150.46	912.657	1159.52	527.286	481.913	551.741	535.441		Cd3d	CD3 antigen, delta polypeptide [Source:MGI Symbol;Acc:MGI:88331]	28.4309	734.86	-4.68869	7.77687e-100	1.40789e-97	27.5489	40.9449	26.7679	18.4617	774.655	727.512	632.094	805.179		B2m	beta-2 microglobulin [Source:MGI Symbol;Acc:MGI:88127]	31538	67604.7	-1.10002	2.00915e-12	2.73866e-10	32661.1	34102	28854.4	30534.7	53015.3	70454.9	72327.2	74621.4		Evl	Ena-vasodilator stimulated phosphoprotein [Source:MGI Symbol;Acc:MGI:1194884]
Lgmn	legumain [Source:MGI Symbol;Acc:MGI:1330838]	-1.78427	1347.4	4640.9	4.6513e-18	6.90546e-16	1255.09	1162.83	1884.33	1087.36	3712.64	5679.39	3307.22	5864.36		Igkv1-135	immunoglobulin kappa variable 1-135 [Source:MGI Symbol;Acc:MGI:3819952]	10.1315	1872.06	-7.53197	9.87889e-100	1.77583e-97	9.67934	13.6483	5.53819	11.66	1818.45	3123.57	1062.87	1483.34		Apol6	apolipoprotein L 6 [Source:MGI Symbol;Acc:MGI:1919189]	5.77359	56.8711	-3.28283	2.02094e-12	2.73866e-10	8.51526	6.89944	3.5931	4.08655	38.5877	48.4389	68.6762	71.7816		Slc12a7	solute carrier family 12, member 7 [Source:MGI Symbol;Acc:MGI:1342283]
Dst	dystonin [Source:MGI Symbol;Acc:MGI:104627]	-1.40915	318.386	845.741	8.26036e-18	1.21012e-15	362.206	278.337	338.295	294.706	708.39	927.876	709.074	1037.63		Rasgrp1	RAS guanyl releasing protein 1 [Source:MGI Symbol;Acc:MGI:1314635]	312.939	2342.83	-2.90584	1.90877e-99	3.40722e-97	265.065	309.362	367.366	309.963	2610.66	2459.89	2042.4	2258.38		Pde4c	phosphodiesterase 4C, cAMP specific [Source:MGI Symbol;Acc:MGI:99556]	60.7606	5.15367	3.66392	2.07612e-12	2.79376e-10	59.6068	87.7215	39.5241	56.19	4.28753	1.82788	9.58273	4.91655		Arhgap45	Rho GTPase activating protein 45 [Source:MGI Symbol;Acc:MGI:1917969]
Ncr1	natural cytotoxicity triggering receptor 1 [Source:MGI Symbol;Acc:MGI:1336212]	2.71227	158.828	24.1035	8.76252e-18	1.27524e-15	232.696	148.446	116.98	137.191	32.0539	20.5434	18.3195	25.4972		Ifi47	interferon gamma inducible protein 47 [Source:MGI Symbol;Acc:MGI:99448]	958.247	10500	-3.45353	4.24939e-99	7.53264e-97	1052.07	735.189	1228.55	817.174	11722.8	10363.5	10988.1	8925.86		Nuak1	NUAK family, SNF1-like kinase, 1 [Source:MGI Symbol;Acc:MGI:1925226]	238.318	64.5069	1.88084	2.34321e-12	3.13128e-10	222.248	262.179	246.127	222.717	96.0406	54.8365	63.8849	43.2656		Pde4b	phosphodiesterase 4B, cAMP specific [Source:MGI Symbol;Acc:MGI:99557]
H2-Q10	histocompatibility 2, Q region locus 10 [Source:MGI Symbol;Acc:MGI:95929]	1.17244	1261.68	559.799	1.04973e-17	1.51772e-15	1179.28	1420.55	1019.1	1427.8	513.663	620.581	550.664	554.287		Psmb9	proteasome (prosome, macropain) subunit, beta type 9 (large multifunctional peptidase 2) [Source:MGI Symbol;Acc:MGI:1346526]	1054.87	7159.91	-2.76364	4.66301e-99	8.20883e-97	895.711	895.329	1194.4	1234.02	7112.32	7595.4	7006.07	6925.83		Gm35035	predicted gene, 35035 [Source:MGI Symbol;Acc:MGI:5594194]	62.4684	11.0279	2.54698	3.09069e-12	4.10166e-10	51.9431	65.0519	66.4723	66.4064	10.2901	10.9673	15.9712	6.88317		Map3k14	mitogen-activated protein kinase kinase kinase 14 [Source:MGI Symbol;Acc:MGI:1858204]
Gp5	glycoprotein 5 (platelet) [Source:MGI Symbol;Acc:MGI:1096363]	1.97721	722.858	183.084	1.12137e-17	1.61077e-15	575.95	888.616	628.111	798.756	245.212	185.746	198.282	103.097		H2-D1	histocompatibility 2, D region locus 1 [Source:MGI Symbol;Acc:MGI:95896]	20304	113298	-2.48031	2.21522e-98	3.87299e-96	18661.8	17556.3	22848.7	22149.2	122617	121773	104709	104093		Fcgr4	Fc receptor, IgG, low affinity IV [Source:MGI Symbol;Acc:MGI:2179523]	625.577	1856.26	-1.56979	3.73805e-12	4.9268e-10	453.012	726.413	737.484	585.398	1568.38	2315.01	1526.85	2014.8		Scly	selenocysteine lyase [Source:MGI Symbol;Acc:MGI:1355310]
Mpig6b	megakaryocyte and platelet inhibitory receptor G6b [Source:MGI Symbol;Acc:MGI:2146995]	1.68241	313.021	97.5007	1.16062e-17	1.6564e-15	300.083	303.078	271.9	377.021	116.997	75.3257	103.452	94.2288		Gpr35	G protein-coupled receptor 35 [Source:MGI Symbol;Acc:MGI:1929509]	167.118	1591.1	-3.25315	3.31168e-98	5.75061e-96	139.978	186.527	185.529	156.439	1674.52	1807.22	1564	1318.64		Cxcl10	chemokine (C-X-C motif) ligand 10 [Source:MGI Symbol;Acc:MGI:1352450]	139.73	692.357	-2.30934	4.28395e-12	5.6079e-10	126.026	142.917	150.012	139.964	319.85	1085.76	590.935	772.882		Ephx1	epoxide hydrolase 1, microsomal [Source:MGI Symbol;Acc:MGI:95405]
H2-Eb1	histocompatibility 2, class II antigen E beta [Source:MGI Symbol;Acc:MGI:95901]	-1.59348	6090.26	18379	1.34962e-17	1.91378e-15	6218.57	5096.66	7921.99	5123.82	14220.7	21767.4	14068.3	23459.6		Irf8	interferon regulatory factor 8 [Source:MGI Symbol;Acc:MGI:96395]	1240.44	9053.81	-2.86831	3.75771e-98	6.48103e-96	973.89	1283.85	1385.47	1318.56	9748.72	9805.46	9044.14	7616.91		Gvin-ps7	GTPase, very large interferon inducible, pseudogene 7 [Source:MGI Symbol;Acc:MGI:3644223]	1990.8	5079.97	-1.35191	4.43192e-12	5.7624e-10	1809.49	2286.67	1955.54	1911.48	6043.7	5894.01	3746.85	4635.32		Slc44a2	solute carrier family 44, member 2 [Source:MGI Symbol;Acc:MGI:1915932]
C1s1	complement component 1, s subcomponent 1 [Source:MGI Symbol;Acc:MGI:1355312]	-2.06523	295.111	1235.18	1.54573e-17	2.1779e-15	381.159	246.38	286.655	266.252	770.895	1557.87	882.571	1729.38		Cfp	complement factor properdin [Source:MGI Symbol;Acc:MGI:97545]	929.908	6789.98	-2.86846	2.12896e-97	3.64724e-95	843.591	1058.2	924.877	892.965	8323.45	6926.22	5805.74	6104.51		Marco	macrophage receptor with collagenous structure [Source:MGI Symbol;Acc:MGI:1309998]	29.3994	256.39	-3.12689	4.53701e-12	5.85944e-10	34.9126	39.4254	19.762	23.4977	151.778	470.68	114.993	288.11		Arhgef3	Rho guanine nucleotide exchange factor (GEF) 3 [Source:MGI Symbol;Acc:MGI:1918954]
Gbp11	guanylate binding protein 11 [Source:MGI Symbol;Acc:MGI:3646307]	-4.13764	7.54293	132.633	1.84712e-17	2.58608e-15	4.2117	7.21614	12.6465	6.09737	81.7374	204.578	65.7348	178.48		Fpr1	formyl peptide receptor 1 [Source:MGI Symbol;Acc:MGI:107443]	58.9878	1896.12	-5.01172	4.90242e-97	8.34261e-95	38.7173	60.9625	87.688	48.5835	2576.72	1625.62	1565.08	1817.03		Serpinb9	serine (or cysteine) peptidase inhibitor, clade B, member 9 [Source:MGI Symbol;Acc:MGI:106603]	240.681	516.348	-1.10177	5.24791e-12	6.73237e-10	242.685	231.624	252.415	235.998	469.056	619.653	491.913	484.772		Nckap1	NCK-associated protein 1 [Source:MGI Symbol;Acc:MGI:1355333]
Lag3	lymphocyte-activation gene 3 [Source:MGI Symbol;Acc:MGI:106588]	-1.38661	257.56	673.292	2.04302e-17	2.84237e-15	259.019	239.163	328.81	203.246	709.993	607.741	628.253	747.179		Tlr2	toll-like receptor 2 [Source:MGI Symbol;Acc:MGI:1346060]	642.145	3921.34	-2.61109	1.46534e-96	2.4771e-94	612.776	575.049	589.817	790.939	4128.37	3855.48	4055.58	3645.91		Mlkl	mixed lineage kinase domain-like [Source:MGI Symbol;Acc:MGI:1921818]	491.924	1169.02	-1.24682	7.6813e-12	9.78882e-10	458.972	450.435	581.184	477.104	1045.3	1044.64	1478.93	1107.21		Spib	Spi-B transcription factor (Spi-1/PU.1 related) [Source:MGI Symbol;Acc:MGI:892986]
Spock2	sparc/osteonectin, cwcv and kazal-like domains proteoglycan 2 [Source:MGI Symbol;Acc:MGI:1891351]	-2.12175	74.8489	325.165	2.08973e-17	2.88918e-15	93.7103	76.2849	66.3943	63.0062	394.263	398.884	200.437	307.075		Zbp1	Z-DNA binding protein 1 [Source:MGI Symbol;Acc:MGI:1927449]	408.653	7373.8	-4.17338	8.27282e-96	1.38929e-93	432.592	231.111	549.204	421.705	7629.53	7419.3	7777.79	6668.56		Nrg1	neuregulin 1 [Source:MGI Symbol;Acc:MGI:96083]	105.543	343.211	-1.69587	8.23342e-12	1.04234e-09	102.183	96.5922	114.081	109.315	272.687	347.298	490.316	262.544		Ccne1	cyclin E1 [Source:MGI Symbol;Acc:MGI:88316]
Msr1	macrophage scavenger receptor 1 [Source:MGI Symbol;Acc:MGI:98257]	-1.8834	396.777	1463.82	2.91431e-17	4.00418e-15	468.551	306.17	523.777	288.609	1032.13	1763.31	1228.49	1831.36		H2-M3	histocompatibility 2, M region locus 3 [Source:MGI Symbol;Acc:MGI:95915]	436.862	2245.93	-2.36205	8.79811e-96	1.46785e-93	423.657	457.673	454.131	411.988	2484.28	2358.64	2120.33	2020.48		Ddx60	DExD/H box helicase 60 [Source:MGI Symbol;Acc:MGI:2384570]	329.111	803.594	-1.28746	1.29869e-11	1.63338e-09	309.955	354.829	313.498	338.162	956.976	734.809	911.956	610.635		Ifi206	interferon activated gene 206 [Source:MGI Symbol;Acc:MGI:3646410]
1810059H22Rik	RIKEN cDNA 1810059H22 gene [Source:MGI Symbol;Acc:MGI:1917070]	3.065	317.066	38.0035	4.81429e-17	6.57389e-15	228.485	449.462	139.112	451.205	40.0673	27.3912	28.0181	56.5373		H2-Aa	histocompatibility 2, class II antigen A, alpha [Source:MGI Symbol;Acc:MGI:95895]	11356.4	69858.7	-2.621	1.15271e-95	1.91066e-93	9330.88	11160.7	13610.1	11323.8	73896.5	76104.8	64225.8	65207.7		Hif3a	hypoxia inducible factor 3, alpha subunit [Source:MGI Symbol;Acc:MGI:1859778]	30.0385	223.871	-2.89952	1.46501e-11	1.8306e-09	33.2095	19.7127	38.6258	28.6058	237.529	371.974	81.4532	204.528		F730311O21Rik	RIKEN cDNA F730311O21 gene [Source:MGI Symbol;Acc:MGI:3643355]
Pde5a	phosphodiesterase 5A, cGMP-specific [Source:MGI Symbol;Acc:MGI:2651499]	1.42781	895.114	332.723	5.5591e-17	7.54434e-15	887.615	1023.66	612.303	1056.88	346.983	320.134	317.898	345.875		Trem2	triggering receptor expressed on myeloid cells 2 [Source:MGI Symbol;Acc:MGI:1913150]	230.525	1549.9	-2.75197	1.9372e-95	3.19025e-93	191.353	246.58	234.45	249.719	1641.75	1661.94	1429.79	1466.11		Thsd7b	thrombospondin, type I, domain containing 7B [Source:MGI Symbol;Acc:MGI:2443925]	32.428	106.42	-1.72117	1.65679e-11	2.05688e-09	35.7641	29.569	29.6431	34.7357	117.478	123.382	89.4388	95.3811		Def8	differentially expressed in FDCP 8 [Source:MGI Symbol;Acc:MGI:1346331]
Scml4	Scm polycomb group protein like 4 [Source:MGI Symbol;Acc:MGI:2446140]	2.07256	236.347	56.0714	5.68774e-17	7.67185e-15	268.496	262.874	153.866	260.154	56.0943	62.4861	63.5796	42.1258		Gpr65	G-protein coupled receptor 65 [Source:MGI Symbol;Acc:MGI:108031]	233.676	1471.95	-2.65613	6.60508e-95	1.08078e-92	213.69	227.472	277.832	215.711	1580.9	1456.13	1443.86	1406.91		Gm34095	predicted gene, 34095 [Source:MGI Symbol;Acc:MGI:5593254]	57.6272	4.84904	3.46958	1.77356e-11	2.18773e-09	55.3492	37.4541	61.0827	76.6228	4.28753	8.22548	0	6.88317		Chil3	chitinase-like 3 [Source:MGI Symbol;Acc:MGI:1330860]
Adam9	a disintegrin and metallopeptidase domain 9 (meltrin gamma) [Source:MGI Symbol;Acc:MGI:105376]	-1.25372	815.549	1945.01	7.38156e-17	9.89621e-15	750.735	843.257	869.449	798.756	1520.15	2311.13	1659.53	2289.21		Fcgr1	Fc receptor, IgG, high affinity I [Source:MGI Symbol;Acc:MGI:95498]	437.362	4748.69	-3.44072	1.17711e-94	1.91382e-92	410.255	424.008	537.204	377.98	5745.55	5243.37	4400.85	3605.01		Col1a1	collagen, type I, alpha 1 [Source:MGI Symbol;Acc:MGI:88467]	503.586	110.904	2.17067	2.04963e-11	2.51217e-09	483.667	539.142	509.322	482.213	180.076	95.05	49.5108	118.981		Stxbp1	syntaxin binding protein 1 [Source:MGI Symbol;Acc:MGI:107363]
Gm39321	predicted gene, 39321 [Source:MGI Symbol;Acc:MGI:5622206]	1.50543	387.632	136.252	7.97023e-17	1.0621e-14	370.629	451.524	305.624	422.751	161.872	128.396	123.926	130.812		Hp	haptoglobin [Source:MGI Symbol;Acc:MGI:96211]	526.15	5245.77	-3.31847	2.61184e-94	4.2196e-92	484.711	432.197	491.976	695.716	5300.89	5035.35	4488.52	6158.33		Runx1t1	RUNX1 translocation partner 1 [Source:MGI Symbol;Acc:MGI:104793]	67.6762	10.2831	2.68257	2.18588e-11	2.66221e-09	51.9431	72.937	76.3534	69.4713	15.4351	12.7952	7.98561	4.91655		Kif21b	kinesin family member 21B [Source:MGI Symbol;Acc:MGI:109234]
Nrgn	neurogranin [Source:MGI Symbol;Acc:MGI:1927184]	1.14274	502.958	228.163	8.12503e-17	1.07625e-14	527.515	493.79	475.299	515.228	236.397	190.026	246.775	239.452		H2-T22	histocompatibility 2, T region locus 22 [Source:MGI Symbol;Acc:MGI:95956]	1783.07	9866.97	-2.46796	3.34693e-94	5.37318e-92	1976.82	1436.71	2025.13	1693.62	9837.65	9867.09	9793.13	9970.01		Tnfsf10	tumor necrosis factor (ligand) superfamily, member 10 [Source:MGI Symbol;Acc:MGI:107414]	162.051	410.755	-1.34525	2.85874e-11	3.43817e-09	169.454	177.414	149.114	152.224	405.6	523.689	319.424	394.307		Zfp831	zinc finger protein 831 [Source:MGI Symbol;Acc:MGI:3641861]
Treml1	triggering receptor expressed on myeloid cells-like 1 [Source:MGI Symbol;Acc:MGI:1918576]	1.94613	668.966	172.945	8.58655e-17	1.12392e-14	607.537	722.645	574.363	771.317	260.438	167.771	163.798	99.7717		Ifi211	interferon activated gene 211 [Source:MGI Symbol;Acc:MGI:3041120]	233.404	2847.32	-3.60938	1.71103e-93	2.72973e-91	209.223	191.986	333.214	199.192	2926.6	3031.12	2924.52	2507.03		Denn2b	DENN domain containing 2B [Source:MGI Symbol;Acc:MGI:108517]	1141.97	419.938	1.43859	3.9625e-11	4.73605e-09	1247.49	1081.24	1103.08	1136.06	525.651	460.627	266.719	426.757		Patj	PATJ, crumbs cell polarity complex component [Source:MGI Symbol;Acc:MGI:1277960]
Il10	interleukin 10 [Source:MGI Symbol;Acc:MGI:96537]	-4.87584	2.60598	76.3674	9.05908e-17	1.1788e-14	2.10585	0	5.26938	3.04869	53.6902	89.8773	75.4334	86.4688		H2-Q4	histocompatibility 2, Q region locus 4 [Source:MGI Symbol;Acc:MGI:95933]	3173.38	19161.5	-2.59432	7.54296e-93	1.19591e-90	2936.56	2615.93	3240.76	3900.28	18814.1	18245	19250.7	20336.2		N4bp3	NEDD4 binding protein 3 [Source:MGI Symbol;Acc:MGI:2442218]	250.171	85.2845	1.55506	3.99749e-11	4.74838e-09	202.663	339.058	236.246	222.717	76.318	94.136	91.0359	79.6481		Coq8a	coenzyme Q8A [Source:MGI Symbol;Acc:MGI:1914676]
Gzmk	granzyme K [Source:MGI Symbol;Acc:MGI:1298232]	-3.68383	14.6444	187.864	1.1404e-16	1.46667e-14	9.47632	4.12351	35.8318	9.14606	173.091	147.228	234.921	196.218		Ass1	argininosuccinate synthetase 1 [Source:MGI Symbol;Acc:MGI:88090]	425.26	2877.65	-2.75737	2.48957e-92	3.92277e-90	481.733	349.397	455.977	413.931	3064.68	2979.39	3020.85	2445.68		Oas1g	2'-5' oligoadenylate synthetase 1G [Source:MGI Symbol;Acc:MGI:97429]	159.634	461.415	-1.52702	4.64536e-11	5.48409e-09	177.969	137.989	158.096	164.484	318.135	461.541	611.697	454.289		Hars	histidyl-tRNA synthetase [Source:MGI Symbol;Acc:MGI:108087]
Sorcs2	sortilin-related VPS10 domain containing receptor 2 [Source:MGI Symbol;Acc:MGI:1932289]	2.01734	261.304	64.488	1.1941e-16	1.52686e-14	303.242	294.831	170.728	276.414	64.1077	71.0458	47.4153	75.383		Gm4841	predicted gene 4841 [Source:MGI Symbol;Acc:MGI:3643814]	50.9466	1115.58	-4.46422	5.26728e-92	8.24862e-90	32.0163	58.2328	39.6903	73.8469	1109.32	1169.96	1186.26	996.786		Tmem163	transmembrane protein 163 [Source:MGI Symbol;Acc:MGI:1919410]	133.112	44.6197	1.55495	5.03835e-11	5.91177e-09	121.768	126.161	130.25	154.267	53.1653	47.525	33.5395	44.2489		Gbp3	guanylate binding protein 3 [Source:MGI Symbol;Acc:MGI:1926263]
Klra8	killer cell lectin-like receptor, subfamily A, member 8 [Source:MGI Symbol;Acc:MGI:102968]	5.33895	66.9798	1.69411	1.22489e-16	1.55723e-14	68.4401	65.9761	67.4481	66.0548	2.40404	0	2.15524	2.21715		Slc15a3	solute carrier family 15, member 3 [Source:MGI Symbol;Acc:MGI:1929691]	497.124	4931.91	-3.31155	6.29389e-92	9.79621e-90	393.874	515.906	531.666	547.05	6013.52	5473.4	4237.41	4003.29		Rag2	recombination activating gene 2 [Source:MGI Symbol;Acc:MGI:97849]	192.617	52.4664	1.89101	5.59915e-11	6.52997e-09	179.672	199.098	190.434	201.262	66.0279	28.3322	70.2733	45.2323		Smim5	small integral membrane protein 5 [Source:MGI Symbol;Acc:MGI:1913778]
Apol9b	apolipoprotein L 9b [Source:MGI Symbol;Acc:MGI:1919148]	-3.9328	10.3843	158.699	1.26194e-16	1.59516e-14	12.6351	10.3088	8.43102	10.1623	92.9562	197.73	61.4243	282.686		Phf11b	PHD finger protein 11B [Source:MGI Symbol;Acc:MGI:3645789]	203.523	1779.22	-3.12952	7.75387e-92	1.19955e-89	189.119	183.797	202.144	239.031	1850.04	2037.25	1817.27	1412.29		Smtnl2	smoothelin-like 2 [Source:MGI Symbol;Acc:MGI:2442764]	126.367	28.463	2.16729	5.71846e-11	6.62893e-09	147.314	150.802	97.0137	110.337	36.0152	15.537	36.7338	25.5661		Cd38	CD38 antigen [Source:MGI Symbol;Acc:MGI:107474]
Socs3	suppressor of cytokine signaling 3 [Source:MGI Symbol;Acc:MGI:1201791]	-1.50339	519.714	1473.49	1.53875e-16	1.93402e-14	522.25	418.536	679.751	458.319	1173.17	1680.28	1245.73	1794.78		Ncf1	neutrophil cytosolic factor 1 [Source:MGI Symbol;Acc:MGI:97283]	1091.71	7106.85	-2.7026	9.06651e-92	1.39417e-89	1063.24	1350.27	898.109	1055.23	7396.67	7707.67	6693.27	6629.81		Arntl	aryl hydrocarbon receptor nuclear translocator-like [Source:MGI Symbol;Acc:MGI:1096381]	506.606	209.784	1.27386	5.7713e-11	6.65013e-09	473.448	442.55	588.37	522.057	252.107	180.047	229.985	176.996		Arl4c	ADP-ribosylation factor-like 4C [Source:MGI Symbol;Acc:MGI:2445172]
ENSMUSG00000120156	novel transcript	2.82763	194.115	27.4621	1.5487e-16	1.93553e-14	223.22	232.978	118.034	202.229	35.2593	11.1277	29.0957	34.3658		Wars	tryptophanyl-tRNA synthetase [Source:MGI Symbol;Acc:MGI:104630]	1734.88	10454.4	-2.59105	3.46651e-91	5.29857e-89	1848.75	1624.15	1738.99	1727.63	11168.1	8091.79	10767.2	11790.3		Erfe	erythroferrone [Source:MGI Symbol;Acc:MGI:3606476]	27.0765	421.591	-3.96154	5.85177e-11	6.70271e-09	27.2488	25.6265	27.8465	27.5842	73.7455	999.852	169.295	443.473		Rasa3	RAS p21 protein activator 3 [Source:MGI Symbol;Acc:MGI:1197013]
Itga2b	integrin alpha 2b [Source:MGI Symbol;Acc:MGI:96601]	1.0677	3869.53	1845.66	1.64194e-16	2.04053e-14	3291.44	4229.69	3667.49	4289.5	2091.51	1738.48	2018.38	1534.27		Ifitm1	interferon induced transmembrane protein 1 [Source:MGI Symbol;Acc:MGI:1915963]	128.333	1254.44	-3.28817	6.97029e-91	1.05907e-88	131.043	144.672	119.071	118.544	1342.19	1000.47	1211.15	1463.96		Pvalb	parvalbumin [Source:MGI Symbol;Acc:MGI:97821]	6.46237	92.9339	-3.85427	6.04076e-11	6.87824e-09	4.25763	3.94254	5.38965	12.2596	120.051	25.5904	140.547	85.548		Cd2	CD2 antigen [Source:MGI Symbol;Acc:MGI:88320]
Nampt	nicotinamide phosphoribosyltransferase [Source:MGI Symbol;Acc:MGI:1929865]	-1.32089	2187.82	5465.71	1.76718e-16	2.1839e-14	2118.48	1901.97	2795.94	1934.9	4316.05	6380.43	4796.49	6369.87		Pstpip2	proline-serine-threonine phosphatase-interacting protein 2 [Source:MGI Symbol;Acc:MGI:1335088]	191.016	2034.62	-3.41656	1.26204e-89	1.9062e-87	141.467	200.175	189.221	233.201	2261.95	1828.14	1754.49	2293.9		H2-K1	histocompatibility 2, K1, K region [Source:MGI Symbol;Acc:MGI:95904]	24783.3	60888.7	-1.29678	6.92713e-11	7.79525e-09	25515.1	30467.9	20253.4	22896.9	47256.3	59803.8	74232.6	62262.2		Plcg1	phospholipase C, gamma 1 [Source:MGI Symbol;Acc:MGI:97615]
Ccl4	chemokine (C-C motif) ligand 4 [Source:MGI Symbol;Acc:MGI:98261]	-2.18956	52.8552	240.928	1.9622e-16	2.41144e-14	53.6991	32.9881	77.9869	46.7465	220.37	268.776	189.661	284.904		Nkg7	natural killer cell group 7 sequence [Source:MGI Symbol;Acc:MGI:1931250]	91.6589	1421.26	-3.95826	1.5145e-89	2.27406e-87	83.3912	66.4218	89.534	127.289	1621.86	1577.19	1271.77	1214.23		Arhgef25	Rho guanine nucleotide exchange factor (GEF) 25 [Source:MGI Symbol;Acc:MGI:1277173]	139.77	315.36	-1.16851	8.46016e-11	9.46505e-09	156.681	125.176	153.605	123.618	301.842	277.838	351.367	330.392		Gpr171	G protein-coupled receptor 171 [Source:MGI Symbol;Acc:MGI:2442043]
Ppm1e	protein phosphatase 1E (PP2C domain containing) [Source:MGI Symbol;Acc:MGI:2444096]	1.63315	609.852	196.703	2.72762e-16	3.33357e-14	556.997	726.768	403.635	752.009	204.343	176.331	217.679	188.458		C1qa	complement component 1, q subcomponent, alpha polypeptide [Source:MGI Symbol;Acc:MGI:88223]	3209.12	26617	-3.05215	1.84618e-89	2.75588e-87	2917.2	2975.33	4067.8	2876.14	31283.4	29064.2	24253.4	21866.9		Xkrx	X-linked Kx blood group related, X-linked [Source:MGI Symbol;Acc:MGI:3584011]	123.115	41.2052	1.60217	8.83611e-11	9.82852e-09	113.253	122.219	114.979	142.008	36.8727	40.2134	54.3021	33.4325		Gbp2	guanylate binding protein 2 [Source:MGI Symbol;Acc:MGI:102772]
Stab1	stabilin 1 [Source:MGI Symbol;Acc:MGI:2178742]	-1.69351	491.971	1591.76	3.11274e-16	3.78335e-14	476.975	552.55	380.45	557.909	1084.22	1878.01	1260.82	2143.98		Limd2	LIM domain containing 2 [Source:MGI Symbol;Acc:MGI:1915053]	1166.47	5436.63	-2.2206	2.36651e-89	3.51206e-87	1129.5	1220.16	1166.71	1149.49	6233.52	5721.04	4847.86	4944.1		Tgtp2	T cell specific GTPase 2 [Source:MGI Symbol;Acc:MGI:3710083]	251.497	1710.46	-2.7663	1.00326e-10	1.10952e-08	260.567	227.682	269.482	248.258	1883.08	2634.89	402.475	1921.39		Cd55	CD55 molecule, decay accelerating factor for complement [Source:MGI Symbol;Acc:MGI:104850]
Cd4	CD4 antigen [Source:MGI Symbol;Acc:MGI:88335]	-1.31332	398.445	990.91	3.36573e-16	4.06849e-14	431.699	418.536	388.881	354.664	747.656	991.218	969.858	1254.91		Ptpn6	protein tyrosine phosphatase, non-receptor type 6 [Source:MGI Symbol;Acc:MGI:96055]	1380.93	10400.1	-2.91333	6.30933e-89	9.30936e-87	1095.25	1437.62	1584.84	1406.01	11969.7	11428.9	9514.97	8686.89		C6	complement component 6 [Source:MGI Symbol;Acc:MGI:88233]	14.4113	77.1982	-2.42995	1.01617e-10	1.11738e-08	11.9214	25.6265	9.88102	10.2164	82.3205	66.7178	70.2733	89.4812		Rasgef1b	RasGEF domain family, member 1B [Source:MGI Symbol;Acc:MGI:2443755]
Crmp1	collapsin response mediator protein 1 [Source:MGI Symbol;Acc:MGI:107793]	-2.80305	17.939	125.18	5.15709e-16	6.16648e-14	17.8997	10.3088	24.2392	19.3083	96.9629	151.507	94.8306	157.418		Cd2	CD2 antigen [Source:MGI Symbol;Acc:MGI:88320]	106.932	1393.36	-3.70729	1.14208e-88	1.67544e-86	84.1358	99.1778	137.532	106.884	1697.92	1440.72	1161.37	1273.43		2010309G21Rik	RIKEN cDNA 2010309G21 gene [Source:MGI Symbol;Acc:MGI:1917268]	52.2146	6.95444	2.84433	1.09759e-10	1.20006e-08	37.4671	59.1381	52.9982	59.2549	10.2901	5.48365	3.19424	8.84979		Igkv17-127	immunoglobulin kappa variable 17-127 [Source:MGI Symbol;Acc:MGI:3646891]
Apoe	apolipoprotein E [Source:MGI Symbol;Acc:MGI:88057]	-1.55809	9747.76	28703.9	5.58427e-16	6.64138e-14	10612.4	8569.68	10883.4	8925.53	19529.6	35179.7	21552.4	38554		Dnase1l3	deoxyribonuclease 1-like 3 [Source:MGI Symbol;Acc:MGI:1314633]	109.431	2138.6	-4.29225	3.96742e-88	5.78699e-86	78.1792	128.294	110.764	120.487	2246.73	2656.91	2269.69	1381.08		Gm8221	predicted gene 8221 [Source:MGI Symbol;Acc:MGI:3779789]	7.85238	74.4316	-3.24686	1.3127e-10	1.42713e-08	9.36678	12.8133	7.1862	2.04327	92.6106	100.534	36.7338	67.8484		Nfatc1	nuclear factor of activated T cells, cytoplasmic, calcineurin dependent 1 [Source:MGI Symbol;Acc:MGI:102469]
Cxcl13	chemokine (C-X-C motif) ligand 13 [Source:MGI Symbol;Acc:MGI:1888499]	-5.04666	15.8589	524.07	6.30997e-16	7.46432e-14	13.688	7.21614	24.2392	18.2921	217.165	806.327	242.465	830.322		Dtx3l	deltex 3-like, E3 ubiquitin ligase [Source:MGI Symbol;Acc:MGI:2656973]	1106.01	5352.77	-2.27486	6.78365e-88	9.8386e-86	1095.25	1068.21	1226.71	1033.86	5720.98	5749.66	5430.17	4510.29		Nampt	nicotinamide phosphoribosyltransferase [Source:MGI Symbol;Acc:MGI:1929865]	1363.83	3092.98	-1.18078	1.334e-10	1.44214e-08	1184.47	1445.93	1420.17	1404.75	2509.06	3199.71	3930.52	2732.62		Cyth1	cytohesin 1 [Source:MGI Symbol;Acc:MGI:1334257]
Eps8l1	EPS8-like 1 [Source:MGI Symbol;Acc:MGI:1914675]	1.18632	511.376	224.543	6.79595e-16	7.99645e-14	525.409	553.581	428.928	537.585	255.63	202.01	216.602	223.932		C1qc	complement component 1, q subcomponent, C chain [Source:MGI Symbol;Acc:MGI:88225]	2474.5	23142.1	-3.22536	9.29716e-88	1.34079e-85	2225.5	2335.68	3237.99	2098.81	27254.5	25551	20510.6	19252.2		Irf1	interferon regulatory factor 1 [Source:MGI Symbol;Acc:MGI:96590]	1726.69	5569.19	-1.68922	1.41928e-10	1.52577e-08	1657.92	2208.81	1408.49	1631.55	3490.05	5476.34	7929.71	5380.67		Ptprc	protein tyrosine phosphatase, receptor type, C [Source:MGI Symbol;Acc:MGI:97810]
Cadm1	cell adhesion molecule 1 [Source:MGI Symbol;Acc:MGI:1889272]	-1.85202	164.701	594.573	7.63258e-16	8.93335e-14	203.214	112.366	220.26	122.964	443.145	653.108	599.157	682.882		Pld4	phospholipase D family, member 4 [Source:MGI Symbol;Acc:MGI:2144765]	1677.45	10503.6	-2.64674	7.53326e-87	1.0803e-84	1459.35	1736.07	2030.67	1483.74	10865.1	11904.3	9913.27	9331.68		Sox4	SRY (sex determining region Y)-box 4 [Source:MGI Symbol;Acc:MGI:98366]	1094.69	470.197	1.21703	1.44697e-10	1.54689e-08	1020.13	932.411	1310.58	1115.63	592.536	439.606	412.057	436.59		Rapgef4	Rap guanine nucleotide exchange factor (GEF) 4 [Source:MGI Symbol;Acc:MGI:1917723]
Lhx1	LIM homeobox protein 1 [Source:MGI Symbol;Acc:MGI:99783]	2.87272	87.8155	11.9712	9.22294e-16	1.06817e-13	92.6573	94.8407	61.1249	102.639	11.2189	13.6956	10.7762	12.1943		Ptpn1	protein tyrosine phosphatase, non-receptor type 1 [Source:MGI Symbol;Acc:MGI:97805]	1909.26	8942.16	-2.22771	1.84156e-86	2.62613e-84	1842.05	1791.57	2007.59	1995.81	10268.3	9447.75	8211.81	7840.81		Ass1	argininosuccinate synthetase 1 [Source:MGI Symbol;Acc:MGI:88090]	976.449	2069.89	-1.08479	1.47059e-10	1.56346e-08	975.849	929.454	951.273	1049.22	1950.83	2588.28	1683.37	2057.08		Carmil2	capping protein regulator and myosin 1 linker 2 [Source:MGI Symbol;Acc:MGI:2685431]
Gfra1	glial cell line derived neurotrophic factor family receptor alpha 1 [Source:MGI Symbol;Acc:MGI:1100842]	2.0845	487.694	114.693	1.14756e-15	1.32215e-13	505.404	611.31	277.17	556.893	145.044	120.692	72.2005	120.835		Ptprc	protein tyrosine phosphatase, receptor type, C [Source:MGI Symbol;Acc:MGI:97810]	3372.33	18418.7	-2.44956	2.77117e-86	3.92982e-84	2803.28	3710.52	3413.37	3562.14	20001.8	20499.1	16943.2	16230.6		Ffar1	free fatty acid receptor 1 [Source:MGI Symbol;Acc:MGI:2684079]	69.1765	7.821	3.1141	1.55734e-10	1.64659e-08	85.1526	88.7071	61.981	40.8655	13.7201	8.22548	6.38849	2.94993		Chst3	carbohydrate sulfotransferase 3 [Source:MGI Symbol;Acc:MGI:1858224]
Socs1	suppressor of cytokine signaling 1 [Source:MGI Symbol;Acc:MGI:1354910]	-1.99098	261.117	1037.92	1.19328e-15	1.3677e-13	193.738	206.175	405.743	238.814	837.407	1230.89	720.928	1362.44		Npc2	NPC intracellular cholesterol transporter 2 [Source:MGI Symbol;Acc:MGI:1915213]	4403.57	13566	-1.62311	3.69196e-86	5.20668e-84	4623.74	4265.55	4344.71	4380.29	14654.1	13614.7	12674.4	13321		Cecr2	CECR2, histone acetyl-lysine reader [Source:MGI Symbol;Acc:MGI:1923799]	1458.71	625.284	1.21966	1.73639e-10	1.82587e-08	1648.55	1201.49	1520.78	1464.01	739.17	704.649	491.913	565.403		9930111J21Rik2	RIKEN cDNA 9930111J21 gene 2 [Source:MGI Symbol;Acc:MGI:3711310]
Tcf7	transcription factor 7, T cell specific [Source:MGI Symbol;Acc:MGI:98507]	1.39413	613.32	233.378	1.307e-15	1.49032e-13	805.487	542.241	594.387	511.163	210.754	257.648	210.136	254.972		Irf7	interferon regulatory factor 7 [Source:MGI Symbol;Acc:MGI:1859212]	1147.27	9130.99	-2.99251	3.7991e-86	5.32835e-84	1210.66	806.16	1359.62	1212.64	9357.88	9005.3	9875.39	8285.38		Scn4a	sodium channel, voltage-gated, type IV, alpha [Source:MGI Symbol;Acc:MGI:98250]	72.4829	12.663	2.58784	2.11458e-10	2.21146e-08	97.9255	72.937	62.8792	56.19	11.1476	7.31154	22.3597	9.8331		Sh3bp5	SH3-domain binding protein 5 (BTK-associated) [Source:MGI Symbol;Acc:MGI:1344391]
Pla2g7	phospholipase A2, group VII (platelet-activating factor acetylhydrolase, plasma) [Source:MGI Symbol;Acc:MGI:1351327]	-1.43804	1361.34	3688.85	1.35754e-15	1.54e-13	1241.4	1254.58	1714.66	1234.72	2654.06	4314.96	3096	4690.38		Lag3	lymphocyte-activation gene 3 [Source:MGI Symbol;Acc:MGI:106588]	122.102	2720.75	-4.48214	3.99909e-86	5.57818e-84	79.6684	89.169	167.992	151.58	3060	3185.2	2455.86	2181.95		Mt2	metallothionein 2 [Source:MGI Symbol;Acc:MGI:97172]	16.6206	168.155	-3.33201	2.2489e-10	2.33922e-08	15.3275	17.7414	17.0672	16.3462	49.7353	119.726	362.547	140.613		Gm26740	predicted gene, 26740 [Source:MGI Symbol;Acc:MGI:5477234]
Ablim1	actin-binding LIM protein 1 [Source:MGI Symbol;Acc:MGI:1194500]	1.40589	2769.15	1045.31	1.50024e-15	1.69321e-13	3213.53	2974.08	1874.85	3014.13	945.589	1063.12	858.863	1313.66		Spi1	spleen focus forming virus (SFFV) proviral integration oncogene [Source:MGI Symbol;Acc:MGI:98282]	986.952	7227.93	-2.8733	4.81583e-86	6.68092e-84	737.863	1068.21	1121.48	1020.25	8153.77	7653.74	6434.59	6669.64		Gm35853	predicted gene, 35853 [Source:MGI Symbol;Acc:MGI:5595012]	336.203	105.945	1.65214	2.68651e-10	2.77938e-08	304.846	389.326	313.498	337.14	150.921	96.8778	63.8849	112.097		Clec2i	C-type lectin domain family 2, member i [Source:MGI Symbol;Acc:MGI:2136650]
Lacc1	laccase domain containing 1 [Source:MGI Symbol;Acc:MGI:2445077]	-1.88185	260.095	958.795	1.57534e-15	1.75116e-13	216.902	266.997	301.409	255.073	658.707	1188.09	631.485	1356.89		Icam1	intercellular adhesion molecule 1 [Source:MGI Symbol;Acc:MGI:96392]	1983.53	8284.28	-2.06189	4.95089e-86	6.83115e-84	2235.18	1835.24	1911.6	1952.08	9204.59	7835.34	7698.78	8398.4		Gzmb	granzyme B [Source:MGI Symbol;Acc:MGI:109267]	43.7245	226.396	-2.37583	4.07678e-10	4.19111e-08	40.0217	37.4541	49.4051	48.0169	137.201	371.06	122.978	274.343		Il2rg	interleukin 2 receptor, gamma chain [Source:MGI Symbol;Acc:MGI:96551]
Adam19	a disintegrin and metallopeptidase domain 19 (meltrin beta) [Source:MGI Symbol;Acc:MGI:105377]	1.03623	3045.27	1484.84	1.70704e-15	1.88807e-13	3280.91	3343.13	2312.21	3244.82	1484.9	1495.39	1611.04	1348.03		Tifab	TRAF-interacting protein with forkhead-associated domain, family member B [Source:MGI Symbol;Acc:MGI:2385852]	533.285	2628.48	-2.30116	6.05173e-86	8.30519e-84	520.45	616.904	501.206	494.58	2638.74	2873.73	2617.13	2384.32		Slc12a3	solute carrier family 12, member 3 [Source:MGI Symbol;Acc:MGI:108114]	127.016	23.1386	2.51717	4.0985e-10	4.19111e-08	131.986	157.702	105.996	112.38	12.8626	13.7091	46.3165	19.6662		Trim7	tripartite motif-containing 7 [Source:MGI Symbol;Acc:MGI:2137353]
Apod	apolipoprotein D [Source:MGI Symbol;Acc:MGI:88056]	-3.4154	316.709	3379.03	1.87369e-15	2.04333e-13	424.329	294.831	310.894	236.781	1659.59	4562.34	1976.36	5317.83		BE692007	expressed sequence BE692007 [Source:MGI Symbol;Acc:MGI:3035348]	163.069	1182.44	-2.85567	6.23585e-86	8.5121e-84	187.63	157.411	143.993	163.241	1096.45	1217.29	1070.45	1345.55		Dennd5b	DENN/MADD domain containing 5B [Source:MGI Symbol;Acc:MGI:2444273]	233.016	84.8014	1.44827	4.1164e-10	4.19111e-08	213.733	277.949	222.772	217.609	115.763	75.8572	71.8705	75.7149		Bin1	bridging integrator 1 [Source:MGI Symbol;Acc:MGI:108092]
Ifi211	interferon activated gene 211 [Source:MGI Symbol;Acc:MGI:3041120]	-1.63586	542.58	1686.18	1.87512e-15	2.04333e-13	481.186	450.493	792.515	446.124	1330.24	1953.33	1382.59	2078.58		Cd68	CD68 antigen [Source:MGI Symbol;Acc:MGI:88342]	1016.87	7932.71	-2.96382	1.76692e-85	2.39907e-83	902.412	1112.79	1177.79	874.503	9670.32	8311.91	6560.14	7188.48		Myo1e	myosin IE [Source:MGI Symbol;Acc:MGI:106621]	371.527	123.147	1.58258	4.31953e-10	4.37478e-08	345.719	495.774	335.057	309.556	151.778	140.747	83.0503	117.014		Srpk3	serine/arginine-rich protein specific kinase 3 [Source:MGI Symbol;Acc:MGI:1891338]
Dpp4	dipeptidylpeptidase 4 [Source:MGI Symbol;Acc:MGI:94919]	1.34152	1401.13	553.252	2.09903e-15	2.27611e-13	1567.8	1612.29	930.573	1493.86	510.458	515.296	618.554	568.698		Pdcd1	programmed cell death 1 [Source:MGI Symbol;Acc:MGI:104879]	31.2453	1060.21	-5.07847	1.91622e-85	2.58802e-83	35.7391	23.6571	46.1516	19.4334	1119.86	1256.91	726.259	1137.8		Nr1h3	nuclear receptor subfamily 1, group H, member 3 [Source:MGI Symbol;Acc:MGI:1352462]	201.859	517.522	-1.35656	4.92552e-10	4.95396e-08	192.445	201.069	244.331	169.592	376.445	627.878	557.395	508.371		Gm8369	predicted gene 8369 [Source:MGI Symbol;Acc:MGI:3645380]
Ffar1	free fatty acid receptor 1 [Source:MGI Symbol;Acc:MGI:2684079]	3.0907	125.638	14.6964	2.2104e-15	2.38518e-13	102.134	147.415	84.3102	168.694	11.2189	22.2553	6.46572	18.8458		Calhm6	calcium homeostasis modulator family member 6 [Source:MGI Symbol;Acc:MGI:2443082]	110.972	3205.66	-4.85625	2.15876e-85	2.90024e-83	77.4347	63.6921	155.069	147.694	3942.32	3350.3	2824.94	2705.1		Lig4	ligase IV, DNA, ATP-dependent [Source:MGI Symbol;Acc:MGI:1335098]	303.389	129.62	1.22932	4.94289e-10	4.95396e-08	260.567	336.101	306.312	310.578	150.921	121.554	143.741	102.264		Ly6g	lymphocyte antigen 6 complex, locus G [Source:MGI Symbol;Acc:MGI:109440]
Il1b	interleukin 1 beta [Source:MGI Symbol;Acc:MGI:96543]	1.1017	1483.22	691.409	2.22209e-15	2.38616e-13	1635.19	1642.19	1140.29	1515.2	605.818	743.841	683.211	732.767		Lair1	leukocyte-associated Ig-like receptor 1 [Source:MGI Symbol;Acc:MGI:105492]	358.325	3209.8	-3.16506	3.05124e-85	4.0778e-83	261.342	442.205	331.368	398.385	3624.03	3130.17	2933.18	3151.82		Lef1	lymphoid enhancer binding factor 1 [Source:MGI Symbol;Acc:MGI:96770]	498.251	158.673	1.66255	5.2856e-10	5.26998e-08	545.828	484.932	499.441	462.802	144.061	97.7918	244.36	148.48		Tk1	thymidine kinase 1 [Source:MGI Symbol;Acc:MGI:98763]
Clec1b	C-type lectin domain family 1, member b [Source:MGI Symbol;Acc:MGI:1913287]	1.16064	507.179	227.195	2.26514e-15	2.42064e-13	429.593	547.396	510.076	541.65	217.165	211.426	264.017	216.172		Ciita	class II transactivator [Source:MGI Symbol;Acc:MGI:108445]	870.636	5706.69	-2.71351	3.37783e-85	4.49076e-83	658.939	898.059	1001.49	924.058	5880.12	6213.02	5592.52	5141.09		1700016F12Rik	RIKEN cDNA 1700016F12 gene [Source:MGI Symbol;Acc:MGI:1916674]	1.68118	68.8729	-5.37705	5.34592e-10	5.30266e-08	0	4.92817	1.79655	0	14.5776	113.329	71.8705	75.7149		Comt	catechol-O-methyltransferase [Source:MGI Symbol;Acc:MGI:88470]
Stambpl1	STAM binding protein like 1 [Source:MGI Symbol;Acc:MGI:1923880]	1.00335	1095.98	546.33	2.57515e-15	2.7256e-13	1059.24	1243.24	915.819	1165.61	556.936	594.902	530.189	503.293		Unc13d	unc-13 homolog D [Source:MGI Symbol;Acc:MGI:1917700]	443.862	2346.32	-2.40289	4.26589e-85	5.64202e-83	408.021	507.717	409.826	449.883	2366.09	2638.19	2141.98	2239		Aff3	AF4/FMR2 family, member 3 [Source:MGI Symbol;Acc:MGI:106927]	607.48	238.236	1.34743	5.55795e-10	5.4847e-08	547.531	636.72	615.318	630.35	336.142	205.637	220.403	190.762		Ifi44	interferon-induced protein 44 [Source:MGI Symbol;Acc:MGI:2443016]
Errfi1	ERBB receptor feedback inhibitor 1 [Source:MGI Symbol;Acc:MGI:1921405]	-1.56828	257.106	762.624	2.88603e-15	3.04009e-13	277.972	231.947	290.87	227.635	528.087	931.3	645.494	945.614		Gimap4	GTPase, IMAP family member 4 [Source:MGI Symbol;Acc:MGI:1349656]	1027.08	5135.68	-2.3218	4.34953e-85	5.72299e-83	1057.28	1008.16	1024.56	1018.31	5842.68	5601.07	4296.94	4802.01		Nxpe5	neurexophilin and PC-esterase domain family, member 5 [Source:MGI Symbol;Acc:MGI:3584036]	54.6782	219.342	-2.00572	5.86668e-10	5.75982e-08	67.2705	25.6265	58.3879	67.428	275.259	237.625	162.906	201.579		Cnr2	cannabinoid receptor 2 (macrophage) [Source:MGI Symbol;Acc:MGI:104650]
Kctd17	potassium channel tetramerisation domain containing 17 [Source:MGI Symbol;Acc:MGI:1920094]	-1.5597	255.135	752.414	2.91661e-15	3.05774e-13	260.072	203.083	326.702	230.684	543.313	819.167	700.453	946.722		Ctsz	cathepsin Z [Source:MGI Symbol;Acc:MGI:1891190]	4156.57	18958.5	-2.18935	5.25807e-85	6.88295e-83	4139.78	4090.85	4362.25	4033.4	22154.9	19878.4	17415.1	16385.6		F830016B08Rik	RIKEN cDNA F830016B08 gene [Source:MGI Symbol;Acc:MGI:3588218]	3.54534	58.9167	-4.074	6.40456e-10	6.25598e-08	3.4061	5.91381	1.79655	3.06491	108.046	65.8038	17.5683	44.2489		Gm20559	predicted gene, 20559 [Source:MGI Symbol;Acc:MGI:5295666]
Edaradd	EDAR (ectodysplasin-A receptor)-associated death domain [Source:MGI Symbol;Acc:MGI:1931001]	2.47072	244.061	44.0336	3.1149e-15	3.25022e-13	248.49	311.325	107.495	308.933	41.67	47.0786	45.26	42.1258		Icos	inducible T cell co-stimulator [Source:MGI Symbol;Acc:MGI:1858745]	115.749	1947.17	-4.07803	7.88048e-85	1.02631e-82	73.7119	124.655	104.303	160.326	2053.65	2002.03	1554.26	2178.72		Adipoq	adiponectin, C1Q and collagen domain containing [Source:MGI Symbol;Acc:MGI:106675]	729.935	187.616	1.95338	8.32757e-10	8.09331e-08	753.6	597.295	791.38	777.466	275.259	141.661	92.633	240.911		Tmod3	tropomodulin 3 [Source:MGI Symbol;Acc:MGI:1355315]
Psmb9	proteasome (prosome, macropain) subunit, beta type 9 (large multifunctional peptidase 2) [Source:MGI Symbol;Acc:MGI:1346526]	-1.3847	2303.24	6013.96	4.6384e-15	4.77238e-13	2035.3	1884.44	3405.08	1888.15	5835.41	6213.51	5288.96	6717.96		Ak2	adenylate kinase 2 [Source:MGI Symbol;Acc:MGI:87978]	803.601	3314.54	-2.044	1.96429e-84	2.5452e-82	807.852	836.187	808.575	761.789	3679.03	3232.53	2937.51	3409.09		Siglecg	sialic acid binding Ig-like lectin G [Source:MGI Symbol;Acc:MGI:2443630]	1511.06	524.905	1.52706	8.84596e-10	8.55391e-08	1410.13	1997.88	1276.45	1359.8	618.262	347.298	653.223	480.839		Haao	3-hydroxyanthranilate 3,4-dioxygenase [Source:MGI Symbol;Acc:MGI:1349444]
Ifi44	interferon-induced protein 44 [Source:MGI Symbol;Acc:MGI:2443016]	-1.91505	119.616	450.726	6.01456e-15	6.14141e-13	135.827	93.8098	138.058	110.769	407.084	626.573	273.716	495.533		Dram1	DNA-damage regulated autophagy modulator 1 [Source:MGI Symbol;Acc:MGI:1918962]	398.165	4706.13	-3.56334	3.09482e-84	3.98981e-82	385.684	274.786	527.974	404.215	5745.55	4567.59	4127.01	4384.35		Ptger3	prostaglandin E receptor 3 (subtype EP3) [Source:MGI Symbol;Acc:MGI:97795]	121.212	311.902	-1.36472	9.27176e-10	8.92083e-08	117.511	138.975	137.436	90.9257	268.399	381.114	266.719	331.375		Igtp	interferon gamma induced GTPase [Source:MGI Symbol;Acc:MGI:107729]
Nod1	nucleotide-binding oligomerization domain containing 1 [Source:MGI Symbol;Acc:MGI:1341839]	-1.00533	1054.35	2116.48	6.20583e-15	6.29721e-13	920.256	1030.88	1254.11	1012.16	2025.8	2245.22	1811.48	2383.43		Cd53	CD53 antigen [Source:MGI Symbol;Acc:MGI:88341]	1079.45	6391.32	-2.5663	3.16221e-84	4.05621e-82	918.048	1122.8	1174.1	1102.85	7393.16	6872.29	5395.53	5904.29		Dpp4	dipeptidylpeptidase 4 [Source:MGI Symbol;Acc:MGI:94919]	729.073	325.46	1.15977	9.52651e-10	9.09324e-08	654.823	640.663	814.735	806.072	410.745	307.998	276.302	306.793		Galnt6	polypeptide N-acetylgalactosaminyltransferase 6 [Source:MGI Symbol;Acc:MGI:1891640]
Rgs1	regulator of G-protein signaling 1 [Source:MGI Symbol;Acc:MGI:1354694]	-2.37665	77.1488	400.699	6.53546e-15	6.60141e-13	94.7632	35.0498	111.711	67.0711	299.704	381.764	343.761	577.567		Aoah	acyloxyacyl hydrolase [Source:MGI Symbol;Acc:MGI:1350928]	207.761	3145.29	-3.9221	3.90453e-84	4.98335e-82	145.935	217.463	289.832	177.816	3783.17	2905.65	2541.37	3350.97		Sirpb1b	signal-regulatory protein beta 1B [Source:MGI Symbol;Acc:MGI:3779828]	302.414	110.025	1.46039	9.54547e-10	9.09324e-08	289.519	414.952	234.45	270.734	108.903	92.3081	114.993	123.897		Ppp1r13b	protein phosphatase 1, regulatory subunit 13B [Source:MGI Symbol;Acc:MGI:1336199]
Oasl2	2'-5' oligoadenylate synthetase-like 2 [Source:MGI Symbol;Acc:MGI:1344390]	-1.57204	2345.1	6972.42	6.63711e-15	6.64815e-13	1941.59	1865.89	3667.49	1905.43	6123.09	7701.2	5911.82	8153.56		Gm4951	predicted gene 4951 [Source:MGI Symbol;Acc:MGI:3644953]	373.203	4377.7	-3.55183	1.38346e-83	1.75693e-81	393.874	253.859	503.052	342.028	4761.44	4143.85	4806.73	3798.77		Pafah1b3	platelet-activating factor acetylhydrolase, isoform 1b, subunit 3 [Source:MGI Symbol;Acc:MGI:108414]	1106.59	392.963	1.49921	9.85318e-10	9.34013e-08	969.036	1238.94	1090.51	1127.89	304.414	320.794	600.518	346.125		C3	complement component 3 [Source:MGI Symbol;Acc:MGI:88227]
Upp1	uridine phosphorylase 1 [Source:MGI Symbol;Acc:MGI:1097668]	-1.94766	222.563	858.402	6.66247e-15	6.64815e-13	183.209	188.651	373.072	145.321	688.357	972.386	762.955	1009.91		Igfbp3	insulin-like growth factor binding protein 3 [Source:MGI Symbol;Acc:MGI:96438]	6763.87	927.301	2.8668	3.87542e-83	4.89723e-81	7240.89	5993.43	8221.44	5599.73	952.521	805.657	1079.11	871.918		Slamf6	SLAM family member 6 [Source:MGI Symbol;Acc:MGI:1353620]	508.949	243.463	1.06941	9.92828e-10	9.36519e-08	464.082	492.817	565.015	513.883	258.967	201.981	290.676	222.228		Plekhg2	pleckstrin homology domain containing, family G (with RhoGef domain) member 2 [Source:MGI Symbol;Acc:MGI:2141874]
ENSMUSG00000120970	novel transcript	2.46956	198.989	35.9584	6.67189e-15	6.64815e-13	191.632	230.916	126.465	246.944	23.2391	48.7905	47.4153	24.3886		H2-DMa	histocompatibility 2, class II, locus DMa [Source:MGI Symbol;Acc:MGI:95921]	1104.89	8079.41	-2.87088	5.47465e-83	6.88403e-81	871.885	1071.85	1419.62	1056.21	8545.78	8861.12	7658.73	7251.99		Pxdc1	PX domain containing 1 [Source:MGI Symbol;Acc:MGI:1914145]	90.9877	15.4639	2.51148	1.03828e-09	9.74612e-08	96.2224	121.233	56.5913	89.9041	18.0076	24.6764	6.38849	12.783		Hivep2	human immunodeficiency virus type I enhancer binding protein 2 [Source:MGI Symbol;Acc:MGI:1338076]
Ifit2	interferon-induced protein with tetratricopeptide repeats 2 [Source:MGI Symbol;Acc:MGI:99449]	-1.34522	737.538	1873.98	7.5494e-15	7.4888e-13	808.646	659.761	798.839	682.906	1432.81	2255.49	1477.42	2330.22		Tap2	transporter 2, ATP-binding cassette, sub-family B (MDR/TAP) [Source:MGI Symbol;Acc:MGI:98484]	1993.24	7731.87	-1.95602	5.69575e-83	7.12695e-81	1853.22	1786.11	2139.59	2194.03	8033.24	7895.87	7737.74	7260.6		Vcan	versican [Source:MGI Symbol;Acc:MGI:102889]	99.7138	476.627	-2.26002	1.08037e-09	1.0092e-07	85.1526	164.601	67.3706	81.731	477.631	723.842	250.748	454.289		Apol11a	apolipoprotein L 11a [Source:MGI Symbol;Acc:MGI:3649094]
Creb5	cAMP responsive element binding protein 5 [Source:MGI Symbol;Acc:MGI:2443973]	-3.10424	26.0792	224.191	7.9426e-15	7.84368e-13	44.2228	17.5249	25.293	17.2759	149.852	244.809	118.538	383.567		Aldh3b1	aldehyde dehydrogenase 3 family, member B1 [Source:MGI Symbol;Acc:MGI:1914939]	502.442	2069.92	-2.04301	6.87754e-83	8.56371e-81	488.434	497.709	489.206	534.418	2103.97	2233.17	2084.61	1857.94		H2-DMb2	histocompatibility 2, class II, locus Mb2 [Source:MGI Symbol;Acc:MGI:95923]	856.456	270.605	1.66604	1.18552e-09	1.10207e-07	717.836	1249.78	622.504	835.699	199.799	245.85	354.561	282.21		Rgs12	regulator of G-protein signaling 12 [Source:MGI Symbol;Acc:MGI:1918979]
Plxna1	plexin A1 [Source:MGI Symbol;Acc:MGI:107685]	-1.206	303.608	700.935	8.06034e-15	7.92456e-13	297.978	296.893	275.062	344.501	568.956	768.665	635.796	830.322		Lap3	leucine aminopeptidase 3 [Source:MGI Symbol;Acc:MGI:1914238]	828.021	4274.8	-2.36882	8.67593e-83	1.07506e-80	722.227	822.538	887.956	879.361	4667.82	4540.07	4316.42	3574.87		H2-Q5	histocompatibility 2, Q region locus 5 [Source:MGI Symbol;Acc:MGI:95934]	491.227	1390.92	-1.50293	1.39099e-09	1.28071e-07	426.614	679.102	342.243	516.948	1498.06	1567.41	1030.14	1468.08		Tspo2	translocator protein 2 [Source:MGI Symbol;Acc:MGI:1917276]
Ikzf3	IKAROS family zinc finger 3 [Source:MGI Symbol;Acc:MGI:1342542]	1.49428	2038.84	724.162	9.1852e-15	8.99052e-13	2316.43	2340.09	1222.5	2276.35	643.481	624.861	855.63	772.676		Cd44	CD44 antigen [Source:MGI Symbol;Acc:MGI:88338]	733.088	4406.34	-2.58733	1.35899e-82	1.67583e-80	740.097	671.497	846.42	674.339	4948.66	4882.37	4106.45	3687.89		Luzp1	leucine zipper protein 1 [Source:MGI Symbol;Acc:MGI:107629]	112.813	277.914	-1.30683	1.41044e-09	1.28631e-07	99.6285	116.305	123.962	111.358	312.99	332.675	204.432	261.56		Ttc28	tetratricopeptide repeat domain 28 [Source:MGI Symbol;Acc:MGI:2140873]
Whrn	whirlin [Source:MGI Symbol;Acc:MGI:2682003]	2.21065	265.618	57.2423	1.05907e-14	1.03206e-12	348.518	293.8	154.92	265.236	50.4848	78.7496	39.8719	59.863		Ly9	lymphocyte antigen 9 [Source:MGI Symbol;Acc:MGI:96885]	257.498	3540.54	-3.78343	1.54916e-82	1.90114e-80	177.951	247.489	328.599	275.954	4505.17	3742.12	2926.68	2988.2		Cerk	ceramide kinase [Source:MGI Symbol;Acc:MGI:2386052]	2463.41	1185.95	1.05323	1.51747e-09	1.37739e-07	2082.83	2462.12	2668.77	2639.91	1468.91	1142.43	991.812	1140.64		Prkcq	protein kinase C, theta [Source:MGI Symbol;Acc:MGI:97601]
Clcf1	cardiotrophin-like cytokine factor 1 [Source:MGI Symbol;Acc:MGI:1930088]	1.64006	430.735	138.215	1.21903e-14	1.18273e-12	405.376	524.716	289.816	503.033	128.215	154.075	113.15	157.418		Upp1	uridine phosphorylase 1 [Source:MGI Symbol;Acc:MGI:1097668]	217.906	2081.21	-3.25366	1.68637e-82	2.05963e-80	258.364	163.78	247.372	202.107	2395.35	1727.98	2199.34	2002.18		Sit1	suppression inducing transmembrane adaptor 1 [Source:MGI Symbol;Acc:MGI:1889342]	72.573	17.2972	2.03303	1.57087e-09	1.41916e-07	74.9343	55.1955	83.5396	76.6228	23.1526	20.1067	11.1798	14.7496		Mlkl	mixed lineage kinase domain-like [Source:MGI Symbol;Acc:MGI:1921818]
Mafb	v-maf musculoaponeurotic fibrosarcoma oncogene family, protein B (avian) [Source:MGI Symbol;Acc:MGI:104555]	-1.74323	690.228	2310.77	1.44723e-14	1.38589e-12	654.919	576.26	975.89	553.844	1595.48	2914.59	1718.8	3014.21		Bst1	bone marrow stromal cell antigen 1 [Source:MGI Symbol;Acc:MGI:105370]	303.207	4232.23	-3.80064	2.66003e-82	3.23333e-80	435.57	245.67	238.142	293.444	5167.49	3538.51	3744.94	4478		H2-T10	histocompatibility 2, T region locus 10 [Source:MGI Symbol;Acc:MGI:95942]	391.839	1363.79	-1.79827	1.81807e-09	1.63482e-07	379.781	520.415	297.329	369.833	866.938	1206.4	2149.73	1232.09		Ahnak	AHNAK nucleoprotein (desmoyokin) [Source:MGI Symbol;Acc:MGI:1316648]
Denn2b	DENN domain containing 2B [Source:MGI Symbol;Acc:MGI:108517]	1.2042	1024.4	444.29	1.48906e-14	1.41268e-12	1123.47	1085.51	780.923	1107.69	484.013	445.962	493.55	353.635		Ctsc	cathepsin C [Source:MGI Symbol;Acc:MGI:109553]	3744.46	30184.8	-3.01101	2.9203e-82	3.53287e-80	3544.87	3598.61	4300.4	3533.96	37765	31487.7	29802.6	21683.9		Upp1	uridine phosphorylase 1 [Source:MGI Symbol;Acc:MGI:1097668]	95.419	301.051	-1.65959	1.83778e-09	1.64486e-07	57.9038	124.19	101.505	98.0772	220.379	321.708	300.259	361.858		Oasl2	2'-5' oligoadenylate synthetase-like 2 [Source:MGI Symbol;Acc:MGI:1344390]
Pde4c	phosphodiesterase 4C, cAMP specific [Source:MGI Symbol;Acc:MGI:99556]	3.40555	150.834	14.3795	1.49314e-14	1.41268e-12	126.351	214.422	67.4481	195.116	8.01347	13.6956	26.9405	8.86859		Chil1	chitinase-like 1 [Source:MGI Symbol;Acc:MGI:1340899]	506.165	3851.76	-2.92805	8.09954e-82	9.7523e-80	476.521	525.005	572.279	450.855	3226.17	4071.21	3304.42	4805.24		Il9r	interleukin 9 receptor [Source:MGI Symbol;Acc:MGI:96564]	57.7523	6.63499	3.1225	2.14744e-09	1.90429e-07	45.9824	79.8364	44.9137	60.2766	12.8626	2.74183	7.98561	2.94993		Card11	caspase recruitment domain family, member 11 [Source:MGI Symbol;Acc:MGI:1916978]
Cd101	CD101 antigen [Source:MGI Symbol;Acc:MGI:2685862]	1.47521	1077.95	387.744	1.49436e-14	1.41268e-12	1047.66	1312.31	758.791	1193.05	405.481	352.661	494.628	298.206		H2-Eb1	histocompatibility 2, class II antigen E beta [Source:MGI Symbol;Acc:MGI:95901]	11222.2	71113.6	-2.66383	8.9123e-82	1.06805e-79	9281.74	10538.3	13690.4	11378.3	75468	81680.6	64521.2	62784.6		Psmb9	proteasome (prosome, macropain) subunit, beta type 9 (large multifunctional peptidase 2) [Source:MGI Symbol;Acc:MGI:1346526]	1722.84	6928.91	-2.00757	2.93643e-09	2.59201e-07	1717.53	2024.49	1512.69	1636.66	4102.31	5112.59	12904.7	5596.02		Nfkb2	nuclear factor of kappa light polypeptide gene enhancer in B cells 2, p49/p100 [Source:MGI Symbol;Acc:MGI:1099800]
Gzmb	granzyme B [Source:MGI Symbol;Acc:MGI:109267]	-3.73603	108.734	1448.45	1.55901e-14	1.46752e-12	89.4986	57.7291	230.799	56.9088	1302.99	1505.66	1358.88	1626.28		Gbp7	guanylate binding protein 7 [Source:MGI Symbol;Acc:MGI:2444421]	1709.46	11040.5	-2.69117	1.35708e-81	1.61874e-79	1716.22	1383.94	2126.66	1611.03	12227.1	10427.3	11692.7	9815		F2r	coagulation factor II (thrombin) receptor [Source:MGI Symbol;Acc:MGI:101802]	368.607	790.278	-1.10119	3.25633e-09	2.86126e-07	401.92	329.202	330.565	412.741	671.427	976.09	704.331	809.264		Plec	plectin [Source:MGI Symbol;Acc:MGI:1277961]
H2-Ab1	histocompatibility 2, class II antigen A, beta 1 [Source:MGI Symbol;Acc:MGI:103070]	-1.47453	7453.61	20713	1.62217e-14	1.52051e-12	7027.22	6006.92	10534.6	6245.74	16858.7	23976.7	16077	25939.5		Nlrp1b	NLR family, pyrin domain containing 1B [Source:MGI Symbol;Acc:MGI:3582959]	119.28	987.824	-3.0501	1.639e-81	1.94591e-79	117.641	142.852	93.2261	123.402	964.223	1051.1	886.447	1049.53		St6gal1	beta galactoside alpha 2,6 sialyltransferase 1 [Source:MGI Symbol;Acc:MGI:108470]	1025.22	468.027	1.13479	3.68474e-09	3.22298e-07	911.984	1223.17	966.544	999.161	469.056	380.2	594.129	428.723		Phf1	PHD finger protein 1 [Source:MGI Symbol;Acc:MGI:98647]
Neil1	nei endonuclease VIII-like 1 (E. coli) [Source:MGI Symbol;Acc:MGI:1920024]	1.54661	745.428	255.441	1.8086e-14	1.68811e-12	684.401	899.956	484.783	912.573	209.151	268.776	286.647	257.189		Sirpa	signal-regulatory protein alpha [Source:MGI Symbol;Acc:MGI:108563]	2917.09	20236.5	-2.79446	1.69084e-81	1.99817e-79	2560.56	2876.15	3441.98	2789.66	24377.1	22256.8	17050.3	17261.8		Gm47730	predicted gene, 47730 [Source:MGI Symbol;Acc:MGI:6096864]	33.761	1.24142	5.00602	3.79096e-09	3.30088e-07	29.8034	49.2817	31.4396	24.5193	0.857506	0.913942	3.19424	0		Cela1	chymotrypsin-like elastase family, member 1 [Source:MGI Symbol;Acc:MGI:95314]
Nr1h3	nuclear receptor subfamily 1, group H, member 3 [Source:MGI Symbol;Acc:MGI:1352462]	-1.88367	184.918	682.301	1.93654e-14	1.79992e-12	169.521	138.138	287.708	144.304	525.683	801.192	540.965	861.362		Apobec1	apolipoprotein B mRNA editing enzyme, catalytic polypeptide 1 [Source:MGI Symbol;Acc:MGI:103298]	889.22	4385.99	-2.30279	1.70168e-81	2.0017e-79	780.303	951.742	958.106	866.73	4917.07	4465.23	3756.85	4404.8		Grap	GRB2-related adaptor protein [Source:MGI Symbol;Acc:MGI:1918770]	591.307	229.595	1.37081	3.82649e-09	3.31681e-07	556.898	793.436	480.577	534.316	206.659	204.723	303.453	203.545		Syce2	synaptonemal complex central element protein 2 [Source:MGI Symbol;Acc:MGI:1919096]
Ctss	cathepsin S [Source:MGI Symbol;Acc:MGI:107341]	-1.43611	5946.05	16089.3	2.22217e-14	2.05676e-12	5692.11	4839.97	8092.72	5159.39	12918.5	19691.7	12243.9	19503.1		Plek	pleckstrin [Source:MGI Symbol;Acc:MGI:1860485]	1383.02	10855.4	-2.97285	1.9996e-81	2.34136e-79	1144.4	1329.35	1650.38	1407.95	13522.5	11392.6	9319.06	9187.44		Ms4a7	membrane-spanning 4-domains, subfamily A, member 7 [Source:MGI Symbol;Acc:MGI:1918846]	169.615	379.052	-1.15763	4.1797e-09	3.60673e-07	211.178	133.061	162.588	171.635	328.425	417.671	394.489	375.624		Spc25	SPC25, NDC80 kinetochore complex component, homolog (S. cerevisiae) [Source:MGI Symbol;Acc:MGI:1913692]
C3ar1	complement component 3a receptor 1 [Source:MGI Symbol;Acc:MGI:1097680]	-3.13314	113.177	993.215	2.24298e-14	2.06737e-12	109.504	102.057	93.7951	147.353	475.199	1312.21	678.901	1506.55		Clec4a1	C-type lectin domain family 4, member a1 [Source:MGI Symbol;Acc:MGI:3036291]	382.221	4612.51	-3.59372	5.77998e-81	6.73698e-79	321.652	323.92	533.512	349.801	5864.91	4564.29	3793.65	4227.19		Nat8l	N-acetyltransferase 8-like [Source:MGI Symbol;Acc:MGI:2447776]	656.252	255.459	1.36642	5.08736e-09	4.37036e-07	665.893	798.364	564.117	596.636	261.539	171.821	333.798	254.677		Il16	interleukin 16 [Source:MGI Symbol;Acc:MGI:1270855]
Eldr	Egfr long non-coding downstream RNA [Source:MGI Symbol;Acc:MGI:1919985]	1.29888	393.747	159.428	2.32362e-14	2.13282e-12	416.958	395.857	369.911	392.264	203.542	151.507	155.177	127.486		H2-Ab1	histocompatibility 2, class II antigen A, beta 1 [Source:MGI Symbol;Acc:MGI:103070]	11910.2	80039.2	-2.74854	8.07279e-81	9.36663e-79	10065	11217.1	14838.6	11520.1	86856.1	90282	77534.4	65484.3		Rhoh	ras homolog family member H [Source:MGI Symbol;Acc:MGI:1921984]	969.846	452.401	1.10145	5.34535e-09	4.55135e-07	803.84	1187.69	871.327	1016.53	371.3	452.401	490.316	495.588		Ncoa3	nuclear receptor coactivator 3 [Source:MGI Symbol;Acc:MGI:1276535]
Aldh1a7	aldehyde dehydrogenase family 1, subfamily A7 [Source:MGI Symbol;Acc:MGI:1347050]	1.58146	280.61	93.7273	2.58892e-14	2.36651e-12	329.565	295.862	201.291	295.722	102.572	87.3093	80.8215	104.206		Bin2	bridging integrator 2 [Source:MGI Symbol;Acc:MGI:3611448]	629.277	3523.29	-2.4862	8.87151e-81	1.02468e-78	524.918	635.102	688.581	668.509	3817.11	3928.13	3183.2	3164.74		Nsg2	neuron specific gene family member 2 [Source:MGI Symbol;Acc:MGI:1202070]	116.058	44.1952	1.39239	5.61505e-09	4.75993e-07	98.777	111.377	121.267	132.813	38.5877	42.9553	43.1223	52.1154		Pglyrp2	peptidoglycan recognition protein 2 [Source:MGI Symbol;Acc:MGI:1928099]
Gbp7	guanylate binding protein 7 [Source:MGI Symbol;Acc:MGI:2444421]	-2.33077	1299.6	6537.84	2.6534e-14	2.41547e-12	1060.29	1113.35	2004.47	1020.29	5394.67	7719.17	5186.59	7850.92		F830016B08Rik	RIKEN cDNA F830016B08 gene [Source:MGI Symbol;Acc:MGI:3588218]	121.619	1524.52	-3.64868	7.0435e-80	8.09876e-78	107.962	173.789	97.8413	106.884	1431.12	1302.04	1766.4	1598.52		Cobll1	Cobl-like 1 [Source:MGI Symbol;Acc:MGI:2442894]	185.835	75.4192	1.30033	5.995e-09	5.05973e-07	200.109	206.983	185.045	151.202	93.4681	67.6317	76.6618	63.9151		Ms4a1	membrane-spanning 4-domains, subfamily A, member 1 [Source:MGI Symbol;Acc:MGI:88321]
Dnaja4	DnaJ heat shock protein family (Hsp40) member A4 [Source:MGI Symbol;Acc:MGI:1927638]	1.3189	715.633	286.156	2.74015e-14	2.48422e-12	866.557	674.194	616.518	705.263	372.626	277.336	261.862	232.801		Cd48	CD48 antigen [Source:MGI Symbol;Acc:MGI:88339]	289.649	1862.94	-2.68715	2.19837e-79	2.51639e-77	231.559	329.379	311.985	285.671	2041.95	1970.12	1661.41	1778.28		Atp6v0d2	ATPase, H+ transporting, lysosomal V0 subunit D2 [Source:MGI Symbol;Acc:MGI:1924415]	61.2116	11.3075	2.42049	6.05329e-09	5.08662e-07	48.537	43.3679	69.1672	83.7742	9.43256	17.3649	9.58273	8.84979		Nadk2	NAD kinase 2, mitochondrial [Source:MGI Symbol;Acc:MGI:1915896]
Lgr5	leucine rich repeat containing G protein coupled receptor 5 [Source:MGI Symbol;Acc:MGI:1341817]	2.49786	262.053	46.4703	3.08472e-14	2.78519e-12	250.596	375.239	131.735	290.641	56.0943	29.9591	36.6391	63.1887		Cd74	CD74 antigen (invariant polypeptide of major histocompatibility complex, class II antigen-associated) [Source:MGI Symbol;Acc:MGI:96534]	29064.8	186570	-2.6824	7.28703e-79	8.30396e-77	22922.9	29094.6	35540.4	28701.2	197585	211042	177669	159985		Col14a1	collagen, type XIV, alpha 1 [Source:MGI Symbol;Acc:MGI:1341272]	93.0366	10.446	3.08789	6.1074e-09	5.10977e-07	72.3797	123.204	68.2689	108.294	19.7226	7.31154	0	14.7496		H2-Oa	histocompatibility 2, O region alpha locus [Source:MGI Symbol;Acc:MGI:95924]
Cplx2	complexin 2 [Source:MGI Symbol;Acc:MGI:104726]	1.80397	1540.49	440.912	3.10199e-14	2.7894e-12	1604.66	1805.07	946.382	1805.84	467.986	536.696	245.697	513.27		Vmp1	vacuole membrane protein 1 [Source:MGI Symbol;Acc:MGI:1923159]	943.847	3714.11	-1.97625	8.61024e-79	9.76823e-77	982.08	910.798	859.342	1023.17	3937.63	3590.23	3379.11	3949.47		Slc4a8	solute carrier family 4 (anion exchanger), member 8 [Source:MGI Symbol;Acc:MGI:1928745]	63.0759	187.954	-1.57003	6.23666e-09	5.17293e-07	47.6854	71.9513	75.4551	57.2117	131.198	182.788	241.165	196.662		Lynx1	Ly6/neurotoxin 1 [Source:MGI Symbol;Acc:MGI:1345180]
Cp	ceruloplasmin [Source:MGI Symbol;Acc:MGI:88476]	-1.02573	826.764	1683.6	3.37813e-14	3.02541e-12	845.498	809.238	766.169	886.151	1415.98	1923.37	1446.17	1948.87		Tnfrsf1b	tumor necrosis factor receptor superfamily, member 1b [Source:MGI Symbol;Acc:MGI:1314883]	1685.59	8868.78	-2.39533	1.67498e-78	1.89184e-76	1756.43	1577.75	1760.22	1647.95	10758.6	9284.86	7647.91	7783.76		Gm45606	predicted gene 45606 [Source:MGI Symbol;Acc:MGI:5791442]	116.546	45.9662	1.34689	7.08944e-09	5.85503e-07	115.808	112.362	126.657	111.358	40.3028	40.2134	46.3165	57.032		Txndc16	thioredoxin domain containing 16 [Source:MGI Symbol;Acc:MGI:1917811]
Irag2	inositol 1,4,5-triphosphate receptor associated 2 [Source:MGI Symbol;Acc:MGI:108424]	1.00829	6241.86	3103.08	4.18708e-14	3.73477e-12	5918.49	7161.5	4710.83	7176.61	3207.79	2991.63	3265.19	2947.7		Il21r	interleukin 21 receptor [Source:MGI Symbol;Acc:MGI:1890475]	290.661	2318.64	-2.99755	1.82829e-78	2.0559e-76	241.239	282.065	313.831	325.509	2591.93	2707.53	2130.07	1845.02		Adam33	a disintegrin and metallopeptidase domain 33 [Source:MGI Symbol;Acc:MGI:1341813]	265.358	54.4499	2.26709	7.45024e-09	6.12671e-07	309.955	187.271	265.889	298.318	103.758	43.8692	23.9568	46.2156		Gramd3	GRAM domain containing 3 [Source:MGI Symbol;Acc:MGI:1914815]
Prkca	protein kinase C, alpha [Source:MGI Symbol;Acc:MGI:97595]	1.06443	964.606	460.949	4.33426e-14	3.85053e-12	951.844	1118.5	783.031	1005.05	489.623	468.218	494.628	391.327		Glipr2	GLI pathogenesis-related 2 [Source:MGI Symbol;Acc:MGI:1917770]	402.715	2246.24	-2.48116	3.30907e-78	3.70471e-76	329.842	435.836	445.824	399.356	2503	2310.21	2072.71	2099.06		Xkr9	X-linked Kx blood group related 9 [Source:MGI Symbol;Acc:MGI:2686466]	0	19.9279	-6.84543	8.22996e-09	6.73911e-07	0	0	0	0	10.2901	22.8485	23.9568	22.6161		Gm2682	predicted gene 2682 [Source:MGI Symbol;Acc:MGI:3780851]
Lair1	leukocyte-associated Ig-like receptor 1 [Source:MGI Symbol;Acc:MGI:105492]	-1.03593	976.266	2002.39	4.40508e-14	3.89779e-12	986.59	882.431	1096.03	940.011	1609.1	2086.86	1886.91	2426.67		Rac2	Rac family small GTPase 2 [Source:MGI Symbol;Acc:MGI:97846]	1706.49	11865.4	-2.79799	4.57229e-78	5.0966e-76	1444.45	1493.13	1941.13	1947.23	13505	13452.9	10201.2	10302.6		Acta2	actin alpha 2, smooth muscle, aorta [Source:MGI Symbol;Acc:MGI:87909]	206.41	66.2361	1.64148	9.22991e-09	7.5259e-07	189.89	287.805	174.265	173.678	54.0228	53.0086	65.482	92.4311		Cks2	CDC28 protein kinase regulatory subunit 2 [Source:MGI Symbol;Acc:MGI:1913447]
B3gnt5	UDP-GlcNAc:betaGal beta-1,3-N-acetylglucosaminyltransferase 5 [Source:MGI Symbol;Acc:MGI:2137302]	1.08741	815.515	383.973	5.06844e-14	4.46689e-12	932.891	863.875	651.296	813.999	380.64	358.653	440.747	355.852		Atp8b4	ATPase, class I, type 8B, member 4 [Source:MGI Symbol;Acc:MGI:1859664]	333.768	1739.16	-2.38199	9.69395e-78	1.07586e-75	322.396	370.324	293.524	348.829	1582.07	1950.31	1789.13	1635.12		Kmo	kynurenine 3-monooxygenase (kynurenine 3-hydroxylase) [Source:MGI Symbol;Acc:MGI:2138151]	546.137	249.497	1.12309	9.6224e-09	7.81282e-07	456.418	606.165	571.303	550.662	274.402	267.785	180.475	275.327		Trim30b	tripartite motif-containing 30B [Source:MGI Symbol;Acc:MGI:4821256]
Dennd5b	DENN/MADD domain containing 5B [Source:MGI Symbol;Acc:MGI:2444273]	1.58393	468.522	156.312	5.65075e-14	4.96032e-12	465.393	559.766	295.086	553.844	171.488	138.668	145.479	169.612		Prdx5	peroxiredoxin 5 [Source:MGI Symbol;Acc:MGI:1859821]	3317.29	16995	-2.35674	3.49924e-77	3.86674e-75	3987.14	3347.48	2902.93	3031.61	19066.8	15563.9	15601	17748.4		ENSMUSG00000120156	novel transcript	133.307	33.8193	1.98849	1.09033e-08	8.81565e-07	137.096	97.5778	154.503	144.051	48.0203	27.4183	43.1223	16.7163		Cd74	CD74 antigen (invariant polypeptide of major histocompatibility complex, class II antigen-associated) [Source:MGI Symbol;Acc:MGI:96534]
Cpm	carboxypeptidase M [Source:MGI Symbol;Acc:MGI:1917824]	3.23833	953.034	101.008	6.87084e-14	6.0075e-12	1016.07	1149.43	550.124	1096.51	60.101	151.507	54.9586	137.463		Itgam	integrin alpha M [Source:MGI Symbol;Acc:MGI:96607]	485.914	3818.78	-2.97563	3.62179e-77	3.98491e-75	357.391	613.264	472.592	500.41	4322.62	3585.83	3455.95	3910.72		Spon2	spondin 2, extracellular matrix protein [Source:MGI Symbol;Acc:MGI:1923724]	117.456	39.9442	1.55511	1.10419e-08	8.87755e-07	114.104	83.779	117.674	154.267	40.3028	40.2134	39.928	39.3324		Ifrd2	interferon-related developmental regulator 2 [Source:MGI Symbol;Acc:MGI:1316708]
Tbc1d9	TBC1 domain family, member 9 [Source:MGI Symbol;Acc:MGI:1918560]	-1.03074	411.021	840.105	7.54555e-14	6.57146e-12	382.212	424.721	420.497	416.654	721.212	921.028	737.092	981.088		Birc3	baculoviral IAP repeat-containing 3 [Source:MGI Symbol;Acc:MGI:1197007]	1017.65	3707.29	-1.86517	8.00923e-77	8.7744e-75	1002.93	1054.56	962.721	1050.38	3996.14	3951.24	3362.87	3518.89		Egfl6	EGF-like-domain, multiple 6 [Source:MGI Symbol;Acc:MGI:1858599]	64.0607	3.59306	4.09624	1.10721e-08	8.87755e-07	61.3099	46.3248	70.9637	77.6444	2.57252	0	0	11.7997		Dna2	DNA replication helicase/nuclease 2 [Source:MGI Symbol;Acc:MGI:2443732]
Sash1	SAM and SH3 domain containing 1 [Source:MGI Symbol;Acc:MGI:1917347]	-1.22225	408.973	954.296	7.83797e-14	6.77281e-12	460.128	361.838	424.712	389.215	775.704	1111.91	787.74	1141.83		Efhd2	EF hand domain containing 2 [Source:MGI Symbol;Acc:MGI:106504]	2293.08	13993.3	-2.60956	1.06588e-76	1.16272e-74	2109.35	2049.98	2265.12	2747.88	16558	14972.9	12762	11680.5		Cd37	CD37 antigen [Source:MGI Symbol;Acc:MGI:88330]	6445.71	2763.45	1.22137	1.23327e-08	9.82631e-07	6234.02	8508	5177.66	5863.17	2945.53	2822.25	2079.45	3206.57		Arid3b	AT rich interactive domain 3B (BRIGHT-like) [Source:MGI Symbol;Acc:MGI:1930768]
Fscn1	fascin actin-bundling protein 1 [Source:MGI Symbol;Acc:MGI:1352745]	-1.70837	207.376	677.585	8.02396e-14	6.87977e-12	262.178	138.138	265.577	163.613	576.97	746.409	535.577	851.385		Oas3	2'-5' oligoadenylate synthetase 3 [Source:MGI Symbol;Acc:MGI:2180850]	381.145	2943.51	-2.94838	2.91339e-76	3.16456e-74	437.059	291.164	395.057	401.3	2613	3436.15	3220	2504.88		Adgrb1	adhesion G protein-coupled receptor B1 [Source:MGI Symbol;Acc:MGI:1933736]	3.40377	32.0203	-3.21344	1.23576e-08	9.82631e-07	5.10915	1.97127	4.49137	2.04327	44.5903	30.1601	28.7482	24.5827		BE692007	expressed sequence BE692007 [Source:MGI Symbol;Acc:MGI:3035348]
Prkcg	protein kinase C, gamma [Source:MGI Symbol;Acc:MGI:97597]	2.01541	195.461	48.2205	8.67981e-14	7.38485e-12	202.161	242.256	114.873	222.554	51.2862	53.0704	44.1824	44.343		Hmox1	heme oxygenase 1 [Source:MGI Symbol;Acc:MGI:96163]	602.916	8335.41	-3.7898	4.62504e-76	5.00249e-74	464.608	682.416	617.508	647.132	12339.5	7843.04	6037.37	7121.74		Gpr12	G-protein coupled receptor 12 [Source:MGI Symbol;Acc:MGI:101909]	35.7354	0.456971	6.0982	1.31837e-08	1.04401e-06	33.2095	49.2817	35.931	24.5193	0	1.82788	0	0		Pou6f1	POU domain, class 6, transcription factor 1 [Source:MGI Symbol;Acc:MGI:102935]
F2rl2	coagulation factor II (thrombin) receptor-like 2 [Source:MGI Symbol;Acc:MGI:1298208]	1.33856	546.993	215.961	9.20445e-14	7.80121e-12	464.34	574.199	571.201	578.234	224.377	238.817	254.318	146.332		Sod2	superoxide dismutase 2, mitochondrial [Source:MGI Symbol;Acc:MGI:98352]	1630.41	9669.86	-2.56815	5.56356e-76	5.99221e-74	1664.1	1626.88	1643.92	1586.74	12687	8643.2	8510.54	8838.67		Cd274	CD274 antigen [Source:MGI Symbol;Acc:MGI:1926446]	184.277	487.959	-1.40767	1.34513e-08	1.06083e-06	187.336	198.113	176.96	174.7	459.623	708.305	330.604	453.306		L3mbtl3	L3MBTL3 histone methyl-lysine binding protein [Source:MGI Symbol;Acc:MGI:2143628]
Htr7	5-hydroxytryptamine (serotonin) receptor 7 [Source:MGI Symbol;Acc:MGI:99841]	-4.89	2.31475	69.2011	1.09293e-13	9.22777e-12	0	0	3.16163	6.09737	41.67	75.3257	71.1229	88.6859		Slamf6	SLAM family member 6 [Source:MGI Symbol;Acc:MGI:1353620]	83.9927	986.854	-3.5556	1.50386e-75	1.61292e-73	73.7119	106.457	85.8419	69.9602	1025.07	1211.79	805.271	905.288		Prkcg	protein kinase C, gamma [Source:MGI Symbol;Acc:MGI:97597]	105.017	12.7276	2.98696	1.65085e-08	1.28366e-06	96.2224	166.572	67.3706	89.9041	18.8651	18.2788	0	13.7663		Arhgef1	Rho guanine nucleotide exchange factor (GEF) 1 [Source:MGI Symbol;Acc:MGI:1353510]
Slc31a1	solute carrier family 31, member 1 [Source:MGI Symbol;Acc:MGI:1333843]	-1.16241	920.631	2060.54	1.27872e-13	1.07553e-11	765.476	840.165	1215.12	861.762	1895.99	2302.57	1753.29	2290.31		Pilrb1	paired immunoglobin-like type 2 receptor beta 1 [Source:MGI Symbol;Acc:MGI:2450532]	65.4167	621.87	-3.24884	2.20261e-75	2.35246e-73	66.2662	50.0438	81.2267	64.1302	626.043	594.337	614.777	652.324		Il21	interleukin 21 [Source:MGI Symbol;Acc:MGI:1890474]	0	21.9137	-7.00466	1.65436e-08	1.28366e-06	0	0	0	0	18.8651	32.9019	6.38849	29.4993		Gm19951	predicted gene, 19951 [Source:MGI Symbol;Acc:MGI:5012136]
Gad1-ps	glutamate decarboxylase 1, pseudogene [Source:MGI Symbol;Acc:MGI:95633]	1.51877	388.291	135.238	1.40109e-13	1.16957e-11	418.011	441.215	280.331	413.605	171.488	119.836	108.84	140.789		Capg	capping protein (actin filament), gelsolin-like [Source:MGI Symbol;Acc:MGI:1098259]	1038.86	6435.34	-2.63183	2.33504e-75	2.48351e-73	801.151	1015.43	1142.71	1196.13	7189.55	6766.63	5574.12	6211.07		Cadm1	cell adhesion molecule 1 [Source:MGI Symbol;Acc:MGI:1889272]	128.497	335.672	-1.38935	1.67072e-08	1.29115e-06	141.353	119.262	133.843	119.532	383.305	424.069	210.82	324.492		Sh2d3c	SH2 domain containing 3C [Source:MGI Symbol;Acc:MGI:1351631]
Ebf1	early B cell factor 1 [Source:MGI Symbol;Acc:MGI:95275]	1.84562	1526.76	424.565	1.64443e-13	1.36753e-11	1628.87	1818.47	859.964	1799.74	423.111	550.391	240.309	484.447		Rasa4	RAS p21 protein activator 4 [Source:MGI Symbol;Acc:MGI:1858600]	1263.71	4471.73	-1.82363	3.09602e-75	3.27921e-73	1172.69	1299.32	1196.25	1386.57	4749.73	4480.64	4104.28	4552.28		Slamf8	SLAM family member 8 [Source:MGI Symbol;Acc:MGI:1921998]	106.009	271.309	-1.35998	1.69855e-08	1.30741e-06	120.065	103.492	102.403	98.0772	264.112	359.179	183.669	278.277		Ahdc1	AT hook, DNA binding motif, containing 1 [Source:MGI Symbol;Acc:MGI:2444218]
Ighv6-6	immunoglobulin heavy variable 6-6 [Source:MGI Symbol;Acc:MGI:4439619]	-1.94045	62.3509	239.461	1.69547e-13	1.39946e-11	61.0696	76.2849	35.8318	76.2171	260.438	214.849	297.423	185.132		Cd300c2	CD300C molecule 2 [Source:MGI Symbol;Acc:MGI:2153249]	230.036	1900.44	-3.04503	3.69046e-75	3.89267e-73	267.299	228.382	168.915	255.549	1998.66	1923.89	1561.84	2117.36		Cyp2ab1	cytochrome P450, family 2, subfamily ab, polypeptide 1 [Source:MGI Symbol;Acc:MGI:3644957]	73.2808	15.4719	2.31225	1.78504e-08	1.36851e-06	66.419	98.5635	63.7775	64.3631	11.1476	8.22548	28.7482	13.7663		Rassf5	Ras association (RalGDS/AF-6) domain family member 5 [Source:MGI Symbol;Acc:MGI:1926375]
Ralgds	ral guanine nucleotide dissociation stimulator [Source:MGI Symbol;Acc:MGI:107485]	-1.50848	363.922	1035.6	1.70413e-13	1.40138e-11	379.053	341.22	388.881	346.534	696.37	1310.5	796.361	1339.16		Tifa	TRAF-interacting protein with forkhead-associated domain [Source:MGI Symbol;Acc:MGI:2182965]	445.287	2174.63	-2.28831	3.88219e-75	4.07806e-73	433.336	385.792	515.051	446.968	2209.29	2126.4	1975.29	2387.55		Gm51802	predicted gene, 51802 [Source:NCBI gene (formerly Entrezgene);Acc:115487453]	56.6349	10.8721	2.42789	1.87962e-08	1.4353e-06	65.5675	46.3248	72.7603	41.8871	11.1476	4.56971	15.9712	11.7997		Akna	AT-hook transcription factor [Source:MGI Symbol;Acc:MGI:2140340]
Gm15411	predicted gene 15411 [Source:MGI Symbol;Acc:MGI:3705213]	4.01171	63.4306	3.82891	1.77519e-13	1.45441e-11	69.493	81.4393	32.6702	70.1198	6.41077	3.4239	2.15524	3.32572		Sting1	stimulator of interferon response cGAMP interactor 1 [Source:MGI Symbol;Acc:MGI:1919762]	626.845	3487.12	-2.47632	5.03626e-75	5.26867e-73	557.679	660.578	687.658	601.464	3945.83	3857.69	3268.71	2876.25		Vpreb3	pre-B lymphocyte gene 3 [Source:MGI Symbol;Acc:MGI:98938]	1771.07	355.871	2.32	1.9384e-08	1.47433e-06	1626.41	1963.38	1714.81	1779.69	218.664	161.768	761.827	281.227		Slfn5	schlafen 5 [Source:MGI Symbol;Acc:MGI:1329004]
Naaa	N-acylethanolamine acid amidase [Source:MGI Symbol;Acc:MGI:1914361]	-1.33654	1996.36	5041.78	1.78727e-13	1.4589e-11	1742.59	1725.69	2902.38	1614.79	4250.34	5351.55	4535.7	6029.53		Gmfg	glia maturation factor, gamma [Source:MGI Symbol;Acc:MGI:1927135]	291.123	2134.18	-2.87591	8.10784e-75	8.44738e-73	227.092	324.83	323.984	288.586	1998.66	2125.3	1849.74	2563.01		ENSMUSG00000120328	novel transcript	263.638	100.024	1.40869	1.98545e-08	1.50417e-06	245.239	320.331	211.095	277.885	96.8981	67.6317	129.367	106.197		Sptan1	spectrin alpha, non-erythrocytic 1 [Source:MGI Symbol;Acc:MGI:98386]
Ifi204	interferon activated gene 204 [Source:MGI Symbol;Acc:MGI:96429]	-1.32937	1186.52	2981.75	1.89643e-13	1.54231e-11	1149.79	1098.91	1436.43	1060.94	2264.61	3613.92	2273.78	3774.69		Gvin-ps7	GTPase, very large interferon inducible, pseudogene 7 [Source:MGI Symbol;Acc:MGI:3644223]	2166.93	9201.45	-2.0866	8.6355e-75	8.96056e-73	1869.6	2066.35	2310.35	2421.4	9657.44	10026.7	8632.85	8488.83		H2-Oa	histocompatibility 2, O region alpha locus [Source:MGI Symbol;Acc:MGI:95924]	261.43	106.286	1.29243	1.99741e-08	1.5073e-06	271.637	343.001	201.214	229.868	108.046	117.899	91.0359	108.164		Sapcd2	suppressor APC domain containing 2 [Source:MGI Symbol;Acc:MGI:1919330]
Ccl11	chemokine (C-C motif) ligand 11 [Source:MGI Symbol;Acc:MGI:103576]	-3.41307	22.6524	241.334	1.97163e-13	1.5976e-11	26.3231	18.5558	28.4547	17.2759	70.5185	328.694	128.237	437.887		Cd180	CD180 antigen [Source:MGI Symbol;Acc:MGI:1194924]	366.476	3586.01	-3.2918	1.15891e-74	1.19766e-72	280.701	403.08	407.057	375.065	4357.73	4019.48	3371.53	2595.3		Shtn1	shootin 1 [Source:MGI Symbol;Acc:MGI:1918903]	84.9926	268.621	-1.66701	2.07123e-08	1.5569e-06	69.8251	92.6497	76.3534	101.142	309.56	371.06	154.921	238.944		Gdf11	growth differentiation factor 11 [Source:MGI Symbol;Acc:MGI:1338027]
H2-Aa	histocompatibility 2, class II antigen A, alpha [Source:MGI Symbol;Acc:MGI:95895]	-1.47243	6625.24	18384.3	2.12989e-13	1.71328e-11	6629.21	5566.74	8806.2	5498.81	13766.3	22309.2	13400.2	24061.6		N4bp1	NEDD4 binding protein 1 [Source:MGI Symbol;Acc:MGI:2136825]	1792.37	5988.21	-1.74022	1.35624e-74	1.39594e-72	1778.76	1779.74	1802.68	1808.28	6784.67	5958.78	5595.77	5613.65		Fcamr	Fc receptor, IgA, IgM, high affinity [Source:MGI Symbol;Acc:MGI:1927803]	23.0132	0	6.89021	2.09917e-08	1.57176e-06	23.8427	35.4829	7.1862	25.5409	0	0	0	0		Myo1e	myosin IE [Source:MGI Symbol;Acc:MGI:106621]
Snx10	sorting nexin 10 [Source:MGI Symbol;Acc:MGI:1919232]	-1.07375	1519.75	3199.02	2.19514e-13	1.75937e-11	1576.23	1339.11	1881.17	1282.48	2767.85	3422.18	2853.54	3752.52		C1ra	complement component 1, r subcomponent A [Source:MGI Symbol;Acc:MGI:1355313]	1956.63	7458.19	-1.93093	2.20333e-74	2.25872e-72	1659.63	1958.99	2183.89	2023.99	7803.89	7376.38	7089.41	7563.08		Ccr3	chemokine (C-C motif) receptor 3 [Source:MGI Symbol;Acc:MGI:104616]	579.736	260.916	1.15497	2.62744e-08	1.95211e-06	448.754	630.806	556.93	682.454	279.547	207.465	309.842	246.811		Clcf1	cardiotrophin-like cytokine factor 1 [Source:MGI Symbol;Acc:MGI:1930088]
Timp1	tissue inhibitor of metalloproteinase 1 [Source:MGI Symbol;Acc:MGI:98752]	-2.51745	32.5042	186.239	2.50955e-13	2.00411e-11	51.5933	17.5249	26.3469	34.5518	137.03	187.458	143.323	277.144		Ripk3	receptor-interacting serine-threonine kinase 3 [Source:MGI Symbol;Acc:MGI:2154952]	262.016	1239.21	-2.24045	2.47336e-74	2.5254e-72	282.934	237.481	257.526	270.124	1360.91	1258.01	1163.53	1174.4		Rab6b	RAB6B, member RAS oncogene family [Source:MGI Symbol;Acc:MGI:107283]	128.927	50.1207	1.35135	2.66051e-08	1.96908e-06	141.353	132.075	110.488	131.791	65.1704	42.0413	43.1223	50.1488		Dock11	dedicator of cytokinesis 11 [Source:MGI Symbol;Acc:MGI:1923224]
Gpr183	G protein-coupled receptor 183 [Source:MGI Symbol;Acc:MGI:2442034]	1.29241	304.359	123.929	2.52304e-13	2.00763e-11	339.042	298.954	261.361	318.079	128.215	139.524	129.314	98.6631		Tmem106a	transmembrane protein 106A [Source:MGI Symbol;Acc:MGI:1922056]	517.048	3448.23	-2.73768	7.89163e-74	8.02557e-72	476.521	487.7	660.89	443.081	3771.47	3772.94	3309.84	2938.69		Bcl2l14	BCL2-like 14 (apoptosis facilitator) [Source:MGI Symbol;Acc:MGI:1914063]	11.3281	50.7437	-2.1485	2.76848e-08	2.04115e-06	14.4759	6.89944	11.6776	12.2596	36.0152	55.7505	59.0935	52.1154		Ifi209	interferon activated gene 209 [Source:MGI Symbol;Acc:MGI:2138243]
ENSMUSG00000120754	novel transcript	1.62761	1044.83	337.97	2.5328e-13	2.00817e-11	1093.99	1304.06	563.824	1217.44	401.475	306.439	351.304	292.664		Oasl2	2'-5' oligoadenylate synthetase-like 2 [Source:MGI Symbol;Acc:MGI:1344390]	2321.89	10243.8	-2.14143	2.22413e-73	2.2529e-71	2256.03	2085.46	2686.94	2259.13	10538.6	9769.14	11611.5	9056.11		Asb2	ankyrin repeat and SOCS box-containing 2 [Source:MGI Symbol;Acc:MGI:1929743]	138.064	446.283	-1.69541	3.03569e-08	2.22961e-06	109.847	114.334	185.045	143.029	467.341	621.48	245.957	450.356		Hk1	hexokinase 1 [Source:MGI Symbol;Acc:MGI:96103]
Ddit4	DNA-damage-inducible transcript 4 [Source:MGI Symbol;Acc:MGI:1921997]	-1.1812	421.72	956.218	2.61543e-13	2.05893e-11	422.223	350.498	556.447	357.712	976.842	874.805	1081.93	891.294		Marcksl1	MARCKS-like 1 [Source:MGI Symbol;Acc:MGI:97143]	1347.33	6907.32	-2.35806	2.73946e-73	2.76393e-71	1268.74	1365.74	1527.62	1227.22	8209.94	7203.58	5968.1	6247.67		Rsph1	radial spoke head 1 homolog (Chlamydomonas) [Source:MGI Symbol;Acc:MGI:1194909]	139.206	44.9976	1.6505	3.06302e-08	2.24113e-06	152.423	135.032	114.081	155.289	37.7302	26.5043	60.6906	55.0654		Usp46	ubiquitin specific peptidase 46 [Source:MGI Symbol;Acc:MGI:1916977]
Cndp2	CNDP dipeptidase 2 (metallopeptidase M20 family) [Source:MGI Symbol;Acc:MGI:1913304]	-1.2166	1898.81	4412.9	2.71903e-13	2.12904e-11	1894.21	1677.24	2319.58	1704.22	3626.09	5050.25	3426.83	5548.41		Sla	src-like adaptor [Source:MGI Symbol;Acc:MGI:104295]	683.977	4352.54	-2.67034	3.93981e-73	3.95935e-71	577.037	843.466	686.735	628.67	4429.11	5035.35	3636.71	4309		Wnt10a	wingless-type MMTV integration site family, member 10A [Source:MGI Symbol;Acc:MGI:108071]	45.452	2.181	4.31792	3.13448e-08	2.28473e-06	34.061	68.0088	36.8293	42.9088	0.857506	0	0	7.86648		Tdrp	testis development related protein [Source:MGI Symbol;Acc:MGI:1919398]
Cavin4	caveolae associated 4 [Source:MGI Symbol;Acc:MGI:1915266]	-5.01078	3.64213	117.331	2.72374e-13	2.12904e-11	4.2117	3.09263	4.21551	3.04869	28.0471	213.993	37.7167	189.566		Cotl1	coactosin-like 1 (Dictyostelium) [Source:MGI Symbol;Acc:MGI:1919292]	2533.15	12749.3	-2.33147	4.68116e-73	4.67512e-71	2378.14	2524.94	2766.32	2463.18	14415.4	14410.5	11967.6	10203.6		H2-Q10	histocompatibility 2, Q region locus 10 [Source:MGI Symbol;Acc:MGI:95929]	883.218	302.131	1.55169	3.37313e-08	2.4494e-06	706.766	1247.81	737.484	840.807	303.557	201.981	429.626	273.36		Slc28a2	solute carrier family 28 (sodium-coupled nucleoside transporter), member 2 [Source:MGI Symbol;Acc:MGI:1913105]
Vangl2	VANGL planar cell polarity 2 [Source:MGI Symbol;Acc:MGI:2135272]	1.60164	297.869	97.99	2.85394e-13	2.22296e-11	251.649	362.869	220.26	356.696	101.771	109.565	79.7439	100.88		Sema4d	sema domain, immunoglobulin domain (Ig), transmembrane domain (TM) and short cytoplasmic domain, (semaphorin) 4D [Source:MGI Symbol;Acc:MGI:109244]	1357.99	7743.1	-2.51122	4.68868e-73	4.67512e-71	1397.55	1484.94	1367.93	1181.55	8879.28	8681.72	7293.98	6117.42		Igkv4-79	immunoglobulin kappa variable 4-79 [Source:MGI Symbol;Acc:MGI:2685040]	9.07911	1172.62	-7.0082	3.43648e-08	2.48602e-06	24.6942	3.94254	3.5931	4.08655	153.493	3063.53	44.7194	1428.75		Dyrk3	dual-specificity tyrosine-(Y)-phosphorylation regulated kinase 3 [Source:MGI Symbol;Acc:MGI:1330300]
Fabp5	fatty acid binding protein 5, epidermal [Source:MGI Symbol;Acc:MGI:101790]	-1.30147	704.576	1736.81	2.91086e-13	2.25934e-11	762.317	595.847	848.371	611.77	1285.36	2035.51	1497.89	2128.46		Ighv1-55	immunoglobulin heavy variable 1-55 [Source:MGI Symbol;Acc:MGI:4439716]	6.59316	3155.33	-8.90334	5.27843e-73	5.24269e-71	6.70108	3.63955	9.23031	6.80169	2752.25	5515.23	2498.07	1855.79		Oasl2	2'-5' oligoadenylate synthetase-like 2 [Source:MGI Symbol;Acc:MGI:1344390]	1915.82	5276.46	-1.46194	3.55037e-08	2.55308e-06	2013.86	2126.01	1668.1	1855.29	5548.06	6722.96	2793.37	6041.46		Dusp2	dual specificity phosphatase 2 [Source:MGI Symbol;Acc:MGI:101911]
Rag2	recombination activating gene 2 [Source:MGI Symbol;Acc:MGI:97849]	2.68066	279.149	43.2312	3.05203e-13	2.36063e-11	310.613	344.313	150.704	310.966	57.697	59.0622	12.9314	43.2344		Cd38	CD38 antigen [Source:MGI Symbol;Acc:MGI:107474]	1007.1	7448.58	-2.88679	6.70462e-73	6.63342e-71	981.336	969.94	1038.41	1038.72	9932.43	7360.97	5556.8	6944.13		H2-DMb1	histocompatibility 2, class II, locus Mb1 [Source:MGI Symbol;Acc:MGI:95922]	949.362	2476.49	-1.38286	3.63901e-08	2.60318e-06	1017.57	1168.96	775.211	835.699	1504.06	2808.54	3012.17	2581.19		Vipr1	vasoactive intestinal peptide receptor 1 [Source:MGI Symbol;Acc:MGI:109272]
Lyz1	lysozyme 1 [Source:MGI Symbol;Acc:MGI:96902]	-2.00792	118.992	478.628	3.09028e-13	2.38189e-11	104.24	98.9642	182.321	90.4443	290.889	604.318	406.263	613.041		Pik3cd	phosphatidylinositol-4,5-bisphosphate 3-kinase catalytic subunit delta [Source:MGI Symbol;Acc:MGI:1098211]	1640.72	8012.14	-2.28838	1.17083e-72	1.15393e-70	1319.37	1744.25	1690.99	1808.28	8470.89	8878.73	7313.46	7385.47		Btla	B and T lymphocyte associated [Source:MGI Symbol;Acc:MGI:2658978]	788.665	314.31	1.32319	3.726e-08	2.65554e-06	693.994	1087.16	644.063	729.449	385.02	346.384	234.777	291.06		Dennd1c	DENN/MADD domain containing 1C [Source:MGI Symbol;Acc:MGI:1918035]
A130071D04Rik	RIKEN cDNA A130071D04 gene [Source:MGI Symbol;Acc:MGI:2444749]	-2.35876	23.7179	121.632	3.15012e-13	2.4112e-11	32.6407	19.5867	27.4008	15.2434	88.9495	136.956	112.072	148.549		Tspo	translocator protein [Source:MGI Symbol;Acc:MGI:88222]	1451.69	5643.08	-1.9586	1.30641e-72	1.28259e-70	1464.56	1399.41	1556.23	1386.57	6324.79	5948.87	5380.38	4918.27		Irag2	inositol 1,4,5-triphosphate receptor associated 2 [Source:MGI Symbol;Acc:MGI:108424]	4471.41	2019.03	1.14603	3.88276e-08	2.74239e-06	4205.69	4624.6	4399.75	4655.6	2478.19	1984.17	1325.61	2288.16		Zfp318	zinc finger protein 318 [Source:MGI Symbol;Acc:MGI:1889348]
Gpam	glycerol-3-phosphate acyltransferase, mitochondrial [Source:MGI Symbol;Acc:MGI:109162]	1.23781	1501.08	636.358	3.22165e-13	2.45745e-11	1470.94	1821.56	1010.67	1701.17	640.276	687.347	558.207	659.602		Sh2d2a	SH2 domain containing 2A [Source:MGI Symbol;Acc:MGI:1351596]	176.247	1334.22	-2.92351	1.83734e-72	1.79694e-70	138.489	175.608	197.529	193.362	1417.08	1467.13	1081.27	1371.39		Igkv3-7	immunoglobulin kappa variable 3-7 [Source:MGI Symbol;Acc:MGI:1330852]	32.9324	366.105	-3.47716	3.89172e-08	2.74239e-06	36.6156	48.2961	16.1689	30.6491	788.048	220.26	43.1223	412.99		Birc3	baculoviral IAP repeat-containing 3 [Source:MGI Symbol;Acc:MGI:1197007]
Iglc3	immunoglobulin lambda constant 3 [Source:MGI Symbol;Acc:MGI:99886]	1.29391	322.346	131.176	3.33631e-13	2.52748e-11	367.471	283.491	319.325	319.096	129.818	150.651	142.246	101.989		H2-Q5	histocompatibility 2, Q region locus 5 [Source:MGI Symbol;Acc:MGI:95934]	591.262	3228.82	-2.45	1.92243e-72	1.87297e-70	543.532	558.671	577.817	685.027	2679.7	3380.02	3100.94	3754.63		Mecom	MDS1 and EVI1 complex locus [Source:MGI Symbol;Acc:MGI:95457]	15.0279	60.0439	-2.01065	4.22443e-08	2.94532e-06	16.179	18.7271	9.88102	15.3246	51.4503	76.7711	43.1223	68.8317		Pde7a	phosphodiesterase 7A [Source:MGI Symbol;Acc:MGI:1202402]
Ermn	ermin, ERM-like protein [Source:MGI Symbol;Acc:MGI:1925017]	-4.84078	3.3876	96.8126	3.59754e-13	2.71608e-11	6.31755	3.09263	2.10775	2.03246	78.532	154.075	19.3972	135.246		Gpr141	G protein-coupled receptor 141 [Source:MGI Symbol;Acc:MGI:2672983]	114.769	2122.58	-4.21252	2.39458e-72	2.3241e-70	66.2662	149.222	153.223	90.3653	2187.05	1795.12	1968.8	2539.33		Ccl6	chemokine (C-C motif) ligand 6 [Source:MGI Symbol;Acc:MGI:98263]	5215.76	2471.93	1.0779	4.40606e-08	3.04985e-06	4217.61	6090.24	5157.89	5397.31	2324.7	1938.47	3111.19	2513.34		Acsf2	acyl-CoA synthetase family member 2 [Source:MGI Symbol;Acc:MGI:2388287]
Irag1	inositol 1,4,5-triphosphate receptor associated 1 [Source:MGI Symbol;Acc:MGI:1338023]	1.1406	770.835	349.485	4.15559e-13	3.11613e-11	673.872	902.017	608.087	899.362	348.586	377.484	344.838	327.029		Apol7c	apolipoprotein L 7c [Source:MGI Symbol;Acc:MGI:1920912]	58.3992	1125.62	-4.26866	3.5445e-72	3.42716e-70	62.5434	47.3142	48.9206	74.8186	1544.63	1085.21	1114.82	757.815		Alox15	arachidonate 15-lipoxygenase [Source:MGI Symbol;Acc:MGI:87997]	3063.31	1449.45	1.07922	4.96466e-08	3.41196e-06	2460.91	3839.05	2922.09	3031.2	1598.39	1166.19	1352.76	1680.48		Map4k2	mitogen-activated protein kinase kinase kinase kinase 2 [Source:MGI Symbol;Acc:MGI:1346883]
Trafd1	TRAF type zinc finger domain containing 1 [Source:MGI Symbol;Acc:MGI:1923551]	-1.12757	2937.3	6417.78	4.92317e-13	3.67923e-11	2509.12	2743.16	3760.23	2736.7	5593.4	7213.29	5229.69	7634.75		Tnfrsf14	tumor necrosis factor receptor superfamily, member 14 (herpesvirus entry mediator) [Source:MGI Symbol;Acc:MGI:2675303]	521.874	2608.59	-2.32252	4.28094e-72	4.12359e-70	432.592	573.229	604.585	477.09	2685.55	2725.14	2545.69	2477.97		Ppa1	pyrophosphatase (inorganic) 1 [Source:MGI Symbol;Acc:MGI:97831]	925.209	2270.4	-1.29415	5.81857e-08	3.98458e-06	986.918	780.623	971.933	961.36	1498.06	2224.53	3200.63	2158.37		Cenpa	centromere protein A [Source:MGI Symbol;Acc:MGI:88375]
Rasal1	RAS protein activator like 1 (GAP1 like) [Source:MGI Symbol;Acc:MGI:1330842]	2.2478	142.607	29.8828	5.4095e-13	4.01556e-11	120.033	154.632	114.873	180.889	30.4512	38.5188	15.0867	35.4744		Cd163	CD163 antigen [Source:MGI Symbol;Acc:MGI:2135946]	1231.08	58.1089	4.40321	4.64071e-72	4.45334e-70	1061.75	1168.3	1699.3	994.99	50.3175	46.2262	47.6235	88.2683		Klrc1	killer cell lectin-like receptor subfamily C, member 1 [Source:MGI Symbol;Acc:MGI:1336161]	78.3329	221.579	-1.49189	6.11179e-08	4.17054e-06	86.8556	72.937	87.1327	66.4064	138.916	222.088	305.05	220.261		Phf10	PHD finger protein 10 [Source:MGI Symbol;Acc:MGI:1919307]
Igkv13-84	immunoglobulin kappa chain variable 13-84 [Source:MGI Symbol;Acc:MGI:96514]	-2.44332	34.6207	188.133	5.57164e-13	4.12208e-11	31.5877	31.9572	49.5322	25.4057	236.397	129.252	270.483	116.4		Sell	selectin, lymphocyte [Source:MGI Symbol;Acc:MGI:98279]	586.994	3346.9	-2.51288	6.62522e-72	6.33391e-70	470.565	556.851	625.815	694.744	3096.28	3361.3	3130.17	3799.84		Plk2	polo like kinase 2 [Source:MGI Symbol;Acc:MGI:1099790]	71.8272	16.9452	2.09119	7.0441e-08	4.78974e-06	38.3187	93.6353	66.4723	88.8824	16.2926	14.6231	19.1655	17.6996		Bub1	BUB1, mitotic checkpoint serine/threonine kinase [Source:MGI Symbol;Acc:MGI:1100510]
Cd274	CD274 antigen [Source:MGI Symbol;Acc:MGI:1926446]	-2.53533	362.091	2099.04	6.05652e-13	4.46588e-11	383.264	271.121	492.161	301.82	1365.49	2641.54	1379.35	3009.78		Olfr56	olfactory receptor 56 [Source:MGI Symbol;Acc:MGI:1333785]	40.2355	650.19	-4.02643	1.01441e-71	9.66191e-70	26.8043	30.0263	52.6128	51.4985	663.488	615.249	619.106	702.917		Socs1	suppressor of cytokine signaling 1 [Source:MGI Symbol;Acc:MGI:1354910]	197.952	615.07	-1.63485	9.32957e-08	6.32144e-06	192.445	192.199	167.079	240.085	294.982	783.248	758.633	623.418		Map3k1	mitogen-activated protein kinase kinase kinase 1 [Source:MGI Symbol;Acc:MGI:1346872]
ENSMUSG00000120309	novel transcript	2.66378	137.122	21.4194	6.60993e-13	4.82568e-11	167.415	147.415	83.2563	150.402	17.6296	38.5188	14.0091	15.52		Coro1a	coronin, actin binding protein 1A [Source:MGI Symbol;Acc:MGI:1345961]	3086.05	16705	-2.43664	1.71594e-71	1.6283e-69	2480.14	3434.83	3527.82	2901.41	17014.3	19274.1	15250.4	15281.2		Aldh3b2	aldehyde dehydrogenase 3 family, member B2 [Source:MGI Symbol;Acc:MGI:2147613]	193.264	60.6665	1.67428	9.37403e-08	6.32928e-06	249.497	178.4	179.655	165.505	83.178	31.074	65.482	62.9318		Fli1	Friend leukemia integration 1 [Source:MGI Symbol;Acc:MGI:95554]
Xkrx	X-linked Kx blood group related, X-linked [Source:MGI Symbol;Acc:MGI:3584011]	1.97679	123.835	31.1531	6.82219e-13	4.96427e-11	111.61	127.829	108.549	147.353	39.266	35.0949	25.8629	24.3886		Epsti1	epithelial stromal interaction 1 (breast) [Source:MGI Symbol;Acc:MGI:1915168]	430.823	2501.86	-2.53827	2.97908e-71	2.81645e-69	409.51	350.307	524.282	439.195	2699.59	2683.32	2388.75	2235.77		Il15ra	interleukin 15 receptor, alpha chain [Source:MGI Symbol;Acc:MGI:104644]	148.934	348.375	-1.23139	9.94083e-08	6.68851e-06	132.838	182.342	129.352	151.202	360.152	390.253	237.971	405.124		Dock2	dedicator of cyto-kinesis 2 [Source:MGI Symbol;Acc:MGI:2149010]
Cd8a	CD8 antigen, alpha chain [Source:MGI Symbol;Acc:MGI:88346]	-1.41361	239.298	637.474	7.16685e-13	5.19797e-11	324.301	161.848	270.846	200.197	589.791	620.581	643.339	696.185		Apobec3	apolipoprotein B mRNA editing enzyme, catalytic polypeptide 3 [Source:MGI Symbol;Acc:MGI:1933111]	1696.83	6825.78	-2.00875	5.11616e-71	4.81901e-69	1431.8	1670.55	1744.53	1940.42	6940.3	7100.12	6283.06	6979.65		Adamts20	a disintegrin-like and metallopeptidase (reprolysin type) with thrombospondin type 1 motif, 20 [Source:MGI Symbol;Acc:MGI:2660628]	0	15.5999	-6.49131	1.18007e-07	7.9122e-06	0	0	0	0	14.5776	19.1928	20.7626	7.86648		Tarsl2	threonyl-tRNA synthetase-like 2 [Source:MGI Symbol;Acc:MGI:2444486]
Klra1	killer cell lectin-like receptor, subfamily A, member 1 [Source:MGI Symbol;Acc:MGI:101907]	2.71439	77.715	11.6913	7.35332e-13	5.31578e-11	77.9164	92.7789	54.8016	85.3632	12.8215	15.4075	10.7762	7.76002		Gpr132	G protein-coupled receptor 132 [Source:MGI Symbol;Acc:MGI:1890220]	322.613	1619.4	-2.32865	6.48783e-71	6.08855e-69	304.527	345.757	279.678	360.49	1447.5	1762.1	1564	1704.01		Fgf23	fibroblast growth factor 23 [Source:MGI Symbol;Acc:MGI:1891427]	0.224569	41.1161	-7.18356	1.21208e-07	8.09862e-06	0	0	0.898275	0	15.4351	99.6197	3.19424	46.2156		Sorl1	sortilin-related receptor, LDLR class A repeats-containing [Source:MGI Symbol;Acc:MGI:1202296]
ENSMUSG00000120328	novel transcript	1.48641	327.435	116.362	7.53227e-13	5.4274e-11	314.824	375.239	249.769	369.907	142.64	129.252	92.6753	100.88		Tbxas1	thromboxane A synthase 1, platelet [Source:MGI Symbol;Acc:MGI:98497]	330.242	2251.87	-2.77053	2.64289e-70	2.47115e-68	280.701	326.65	397.826	315.793	2581.4	2521.53	2025.08	1879.47		Ephx2	epoxide hydrolase 2, cytoplasmic [Source:MGI Symbol;Acc:MGI:99500]	89.4249	228.484	-1.34487	1.24399e-07	8.28306e-06	108.144	88.7071	93.4206	67.428	169.786	235.797	301.856	206.495		Osbpl5	oxysterol binding protein-like 5 [Source:MGI Symbol;Acc:MGI:1930265]
Ifng	interferon gamma [Source:MGI Symbol;Acc:MGI:107656]	-3.65851	13.0829	164.946	7.55743e-13	5.42785e-11	7.37047	4.12351	33.7241	7.1136	88.1481	202.01	137.935	231.692		Trpm2	transient receptor potential cation channel, subfamily M, member 2 [Source:MGI Symbol;Acc:MGI:1351901]	276.286	3288.17	-3.57443	1.32774e-69	1.23693e-67	212.945	356.676	237.219	298.303	2811.93	2815.4	2950.49	4574.88		Ripply3	ripply transcriptional repressor 3 [Source:MGI Symbol;Acc:MGI:2181192]	17.8816	66.8179	-1.8987	1.33359e-07	8.84904e-06	17.882	9.85635	23.3551	20.4327	48.0203	77.6851	63.8849	77.6815		Ifi213	interferon activated gene 213 [Source:MGI Symbol;Acc:MGI:3695276]
H2-Q5	histocompatibility 2, Q region locus 5 [Source:MGI Symbol;Acc:MGI:95934]	-1.0325	1123.22	2297.06	8.20762e-13	5.87575e-11	1059.24	961.808	1489.13	982.693	2411.25	2410.42	2281.32	2085.23		A530040E14Rik	RIKEN cDNA A530040E14 gene [Source:MGI Symbol;Acc:MGI:3612703]	74.1472	722.928	-3.28849	1.64076e-69	1.52298e-67	64.7771	61.8724	94.1492	75.7902	827.313	762.732	636.424	665.241		Glrp1	glutamine repeat protein 1 [Source:MGI Symbol;Acc:MGI:108038]	15.8087	71.0643	-2.16637	1.37271e-07	9.07736e-06	11.0698	8.87071	26.9482	16.3462	48.8778	88.6524	67.0791	79.6481		H2-Eb2	histocompatibility 2, class II antigen E beta2 [Source:MGI Symbol;Acc:MGI:95902]
Cerk	ceramide kinase [Source:MGI Symbol;Acc:MGI:2386052]	1.01059	4278.36	2123.97	8.39661e-13	5.99166e-11	4469.66	4808.01	3061.51	4774.24	1928.84	2102.27	2219.9	2244.86		Rab32	RAB32, member RAS oncogene family [Source:MGI Symbol;Acc:MGI:1915094]	354.112	2937.25	-3.05362	3.72101e-69	3.44139e-67	301.549	279.336	370.135	465.43	3526.9	2894.64	2787.06	2540.4		H2-Eb2	histocompatibility 2, class II antigen E beta2 [Source:MGI Symbol;Acc:MGI:95902]	107.859	30.2852	1.82668	1.38287e-07	9.11321e-06	74.9343	96.5922	138.334	121.575	18.0076	40.2134	25.5539	37.3658		Myo1d	myosin ID [Source:MGI Symbol;Acc:MGI:107728]
Mvp	major vault protein [Source:MGI Symbol;Acc:MGI:1925638]	-1.0771	1399.79	2953.31	8.58831e-13	6.10874e-11	1315.1	1257.67	1793.7	1232.69	2558.7	3266.4	2560.43	3427.71		Clec5a	C-type lectin domain family 5, member a [Source:MGI Symbol;Acc:MGI:1345151]	136.882	1188.84	-3.12062	6.49006e-69	5.9807e-67	110.94	189.257	119.071	128.26	1218.15	1273.42	1185.18	1078.6		Il1b	interleukin 1 beta [Source:MGI Symbol;Acc:MGI:96543]	804.415	338.931	1.24724	1.60395e-07	1.0534e-05	779.998	1159.11	576.692	701.865	295.839	357.351	346.575	355.958		Cd27	CD27 antigen [Source:MGI Symbol;Acc:MGI:88326]
Syt11	synaptotagmin XI [Source:MGI Symbol;Acc:MGI:1859547]	-1.53827	172.89	501.604	9.55598e-13	6.77525e-11	222.167	151.539	192.859	124.996	465.582	673.651	414.884	452.298		Xdh	xanthine dehydrogenase [Source:MGI Symbol;Acc:MGI:98973]	4207.91	16890.4	-2.00512	6.83956e-69	6.28009e-67	3876.2	4190.03	4573.62	4191.78	16927.7	15369.1	15246	20018.6		Sorcs2	sortilin-related VPS10 domain containing receptor 2 [Source:MGI Symbol;Acc:MGI:1932289]	119.126	27.6791	2.0757	1.71978e-07	1.12564e-05	120.917	121.233	108.691	125.661	54.8804	23.7625	14.3741	17.6996		Smad7	SMAD family member 7 [Source:MGI Symbol;Acc:MGI:1100518]
Ly6g6f	lymphocyte antigen 6 complex, locus G6F [Source:MGI Symbol;Acc:MGI:3616082]	2.04613	227.054	54.8777	1.06242e-12	7.50856e-11	190.579	235.04	224.476	258.122	56.0943	58.2062	80.8215	24.3886		Trim30a	tripartite motif-containing 30A [Source:MGI Symbol;Acc:MGI:98178]	1090.22	4627.77	-2.08559	8.08836e-69	7.40012e-67	1132.48	917.167	1187.02	1124.22	4793.03	4677.65	5008.05	4032.35		Tgm3	transglutaminase 3, E polypeptide [Source:MGI Symbol;Acc:MGI:98732]	59.5422	12.5295	2.19312	1.7384e-07	1.13397e-05	45.9824	68.0088	62.8792	61.2982	21.4376	9.13942	4.79136	14.7496		Mylip	myosin regulatory light chain interacting protein [Source:MGI Symbol;Acc:MGI:2388271]
Cxcl10	chemokine (C-X-C motif) ligand 10 [Source:MGI Symbol;Acc:MGI:1352450]	-3.37581	182.612	1895.39	1.1711e-12	8.25027e-11	116.875	113.396	375.18	124.996	1448.83	2335.1	1478.49	2319.14		Il18rap	interleukin 18 receptor accessory protein [Source:MGI Symbol;Acc:MGI:1338888]	210.036	2019.94	-3.26652	9.23375e-69	8.41788e-67	183.907	188.347	285.217	182.674	1841.85	1915.09	1744.75	2578.08		Wif1	Wnt inhibitory factor 1 [Source:MGI Symbol;Acc:MGI:1344332]	40.0501	7.04712	2.55469	1.77851e-07	1.15621e-05	28.1004	52.2386	35.931	43.9304	8.57506	5.48365	11.1798	2.94993		Minpp1	multiple inositol polyphosphate histidine phosphatase 1 [Source:MGI Symbol;Acc:MGI:1336159]
Pdlim4	PDZ and LIM domain 4 [Source:MGI Symbol;Acc:MGI:1353470]	-2.04638	69.188	285.866	1.21598e-12	8.53925e-11	84.234	60.8217	73.7714	57.925	171.488	374.917	209.058	388.001		Cd84	CD84 antigen [Source:MGI Symbol;Acc:MGI:1336885]	443.142	3282.74	-2.89039	1.32438e-68	1.20307e-66	344.733	536.834	369.212	521.787	3672	3417.44	2854.17	3187.35		Anpep	alanyl (membrane) aminopeptidase [Source:MGI Symbol;Acc:MGI:5000466]	60.5598	146.664	-1.27845	1.80446e-07	1.16913e-05	61.3099	47.3105	61.0827	72.5362	119.193	181.874	134.158	151.43		S1pr4	sphingosine-1-phosphate receptor 4 [Source:MGI Symbol;Acc:MGI:1333809]
Epha2	Eph receptor A2 [Source:MGI Symbol;Acc:MGI:95278]	1.46533	521.207	188.395	1.31282e-12	9.19015e-11	549.627	591.723	353.049	590.429	243.609	169.483	187.506	152.983		Ctsw	cathepsin W [Source:MGI Symbol;Acc:MGI:1338045]	124.316	778.096	-2.65006	2.59209e-68	2.34631e-66	101.261	140.123	122.763	133.119	787.527	832.071	744.659	748.128		Gm12678	predicted gene 12678 [Source:MGI Symbol;Acc:MGI:3650923]	46.4011	4.93857	3.24655	1.87273e-07	1.20525e-05	35.7641	70.9657	43.1172	35.7573	9.43256	0	6.38849	3.93324		Rcsd1	RCSD domain containing 1 [Source:MGI Symbol;Acc:MGI:2676394]
Il2ra	interleukin 2 receptor, alpha chain [Source:MGI Symbol;Acc:MGI:96549]	1.9472	476.994	123.872	1.44827e-12	1.00902e-10	500.139	525.747	284.547	597.542	92.9562	142.092	79.7439	180.698		Clec4a3	C-type lectin domain family 4, member a3 [Source:MGI Symbol;Acc:MGI:1920399]	266.689	2786.42	-3.38681	2.93759e-68	2.64964e-66	190.608	327.56	284.294	264.294	3564.35	2979.39	2395.25	2206.71		Cxcl14	chemokine (C-X-C motif) ligand 14 [Source:MGI Symbol;Acc:MGI:1888514]	594.926	228.373	1.37574	1.95698e-07	1.25527e-05	402.772	689.944	656.639	630.35	315.562	216.604	158.115	223.211		Sesn3	sestrin 3 [Source:MGI Symbol;Acc:MGI:1922997]
Klra4	killer cell lectin-like receptor, subfamily A, member 4 [Source:MGI Symbol;Acc:MGI:101904]	4.17085	59.1626	3.26009	1.45052e-12	1.00902e-10	82.1281	51.5439	66.3943	36.5842	4.00673	2.56792	6.46572	0		C4b	complement component 4B (Chido blood group) [Source:MGI Symbol;Acc:MGI:88228]	3037.96	15727.9	-2.37243	6.13811e-68	5.51695e-66	2476.42	2728.75	3407.83	3538.82	15990.4	14937.7	17751.7	14231.6		Podxl	podocalyxin-like [Source:MGI Symbol;Acc:MGI:1351317]	48.0267	309.286	-2.6873	1.9936e-07	1.27451e-05	45.1309	62.095	44.0155	40.8655	60.0254	597.718	292.273	287.126		Pgap1	post-GPI attachment to proteins 1 [Source:MGI Symbol;Acc:MGI:2443342]
Fbxl12	F-box and leucine-rich repeat protein 12 [Source:MGI Symbol;Acc:MGI:1354738]	1.10935	752.955	349.373	1.58708e-12	1.10055e-10	715.989	843.257	579.632	872.94	319.737	342.39	334.062	401.304		Msr1	macrophage scavenger receptor 1 [Source:MGI Symbol;Acc:MGI:98257]	221.899	3756.43	-4.08152	1.05373e-67	9.43775e-66	219.646	121.015	334.137	212.796	4605.8	3764.13	3376.94	3278.84		Igkv8-24	immunoglobulin kappa chain variable 8-24 [Source:MGI Symbol;Acc:MGI:4947958]	35.4761	250.231	-2.82223	2.06464e-07	1.31556e-05	27.2488	37.4541	40.4224	36.7789	365.297	298.859	31.9424	304.826		Cd79b	CD79B antigen [Source:MGI Symbol;Acc:MGI:96431]
N4bp3	NEDD4 binding protein 3 [Source:MGI Symbol;Acc:MGI:2442218]	1.404	290.413	109.374	1.61999e-12	1.11987e-10	317.983	268.028	268.739	306.901	133.024	110.421	75.4334	118.617		Cndp2	CNDP dipeptidase 2 (metallopeptidase M20 family) [Source:MGI Symbol;Acc:MGI:1913304]	1551.1	8349.66	-2.42824	1.18371e-67	1.05648e-65	1605.28	1611.41	1571	1416.69	10338.5	8846.81	7492.05	6721.31		ENSMUSG00000119964	novel transcript	37.9919	7.87698	2.29309	2.08584e-07	1.32468e-05	47.6854	36.4685	26.9482	40.8655	8.57506	5.48365	9.58273	7.86648		Dmac2	distal membrane arm assembly complex 2 [Source:MGI Symbol;Acc:MGI:1913599]
Rasgef1b	RasGEF domain family, member 1B [Source:MGI Symbol;Acc:MGI:2443755]	-1.26235	140.92	338.101	1.62653e-12	1.12088e-10	145.304	142.261	162.297	113.818	277.266	384.332	341.606	349.201		Cd8a	CD8 antigen, alpha chain [Source:MGI Symbol;Acc:MGI:88346]	97.612	1378.27	-3.81486	1.54352e-67	1.37282e-65	119.875	132.844	78.4576	59.2719	1558.67	1426.41	1279.34	1248.67		Ighv5-15	immunoglobulin heavy variable 5-15 [Source:MGI Symbol;Acc:MGI:4439812]	1.91991	68.2641	-5.17259	2.11333e-07	1.33773e-05	0	0	3.5931	4.08655	76.318	118.812	3.19424	74.7316		Selenbp1	selenium binding protein 1 [Source:MGI Symbol;Acc:MGI:96825]
Diras2	DIRAS family, GTP-binding RAS-like 2 [Source:MGI Symbol;Acc:MGI:1915453]	1.80032	278.532	79.6404	1.69328e-12	1.16327e-10	250.596	344.313	197.075	322.144	82.5387	105.285	79.7439	50.9944		Zcchc14	zinc finger, CCHC domain containing 14 [Source:MGI Symbol;Acc:MGI:2159407]	3239.47	1122.05	1.52971	2.76968e-67	2.45482e-65	3310.33	2978.06	3338.6	3330.88	1144.43	1116.03	1091.01	1136.72		Adamts5	a disintegrin-like and metallopeptidase (reprolysin type) with thrombospondin type 1 motif, 5 (aggrecanase-2) [Source:MGI Symbol;Acc:MGI:1346321]	150.49	354.75	-1.23186	2.13825e-07	1.3458e-05	133.69	157.702	156.3	154.267	313.847	294.289	515.87	294.993		Traf3ip3	TRAF3 interacting protein 3 [Source:MGI Symbol;Acc:MGI:2441706]
Tmem106a	transmembrane protein 106A [Source:MGI Symbol;Acc:MGI:1922056]	-1.59144	357.006	1075.94	1.76437e-12	1.20835e-10	312.719	305.14	490.053	320.112	760.478	1314.78	800.672	1427.84		Acsl1	acyl-CoA synthetase long-chain family member 1 [Source:MGI Symbol;Acc:MGI:102797]	1273.16	7081.58	-2.47557	2.80391e-67	2.47656e-65	1300.01	1298.41	1163.02	1331.19	9263.09	6372.61	6189.98	6500.64		Rbm24	RNA binding motif protein 24 [Source:MGI Symbol;Acc:MGI:3610364]	43.5236	3.76093	3.75158	2.14007e-07	1.3458e-05	30.6549	57.1668	41.3206	44.952	0	0.913942	11.1798	2.94993		Stard10	START domain containing 10 [Source:MGI Symbol;Acc:MGI:1860093]
Rab7b	RAB7B, member RAS oncogene family [Source:MGI Symbol;Acc:MGI:2442295]	-1.33607	266.979	674.374	1.79122e-12	1.22295e-10	269.549	263.905	282.439	252.025	454.364	810.607	608.855	823.671		Sp110	Sp110 nuclear body protein [Source:MGI Symbol;Acc:MGI:1923364]	845.179	3946.64	-2.22399	3.07648e-67	2.70794e-65	774.347	712.442	863.957	1029.97	4159.97	4065.7	3734.12	3826.75		Zfp773	zinc finger protein 773 [Source:MGI Symbol;Acc:MGI:1923623]	58.2476	160.921	-1.45816	2.184e-07	1.36895e-05	49.3885	75.8939	63.7775	43.9304	131.198	137.091	222	153.396		Dyrk2	dual-specificity tyrosine-(Y)-phosphorylation regulated kinase 2 [Source:MGI Symbol;Acc:MGI:1330301]
Kcnj5	potassium inwardly-rectifying channel, subfamily J, member 5 [Source:MGI Symbol;Acc:MGI:104755]	1.7915	223.773	64.5503	1.99511e-12	1.3538e-10	184.262	280.399	158.082	272.349	56.8956	82.1735	59.2691	59.863		Txn1	thioredoxin 1 [Source:MGI Symbol;Acc:MGI:98874]	1144.02	7041.28	-2.6211	5.08882e-67	4.46382e-65	1393.82	924.446	1260.86	996.933	8130.37	6603.74	6152.1	7278.9		Trim7	tripartite motif-containing 7 [Source:MGI Symbol;Acc:MGI:2137353]	83.9237	16.9919	2.29318	2.38245e-07	1.48367e-05	58.7553	143.903	72.7603	60.2766	24.8677	18.2788	15.9712	8.84979		Cd22	CD22 antigen [Source:MGI Symbol;Acc:MGI:88322]
F730311O21Rik	RIKEN cDNA F730311O21 gene [Source:MGI Symbol;Acc:MGI:3643355]	1.8061	321.579	91.8696	2.04302e-12	1.37796e-10	321.142	390.702	179.159	395.313	92.1549	104.429	71.1229	99.7717		Bak1	BCL2-antagonist/killer 1 [Source:MGI Symbol;Acc:MGI:1097161]	544.268	2620.69	-2.26822	6.80675e-67	5.95031e-65	498.113	485.88	611.047	582.03	2976.92	2682.22	2577.08	2246.54		Meiob	meiosis specific with OB domains [Source:MGI Symbol;Acc:MGI:1922428]	10.9162	74.1333	-2.75125	2.39295e-07	1.4854e-05	14.4759	19.7127	5.38965	4.08655	48.8778	65.8038	127.77	54.082		Gfi1b	growth factor independent 1B [Source:MGI Symbol;Acc:MGI:1276578]
1700027J07Rik	RIKEN cDNA 1700027J07 gene [Source:MGI Symbol;Acc:MGI:1916693]	3.26204	154.088	15.8486	2.04318e-12	1.37796e-10	110.557	234.009	69.5559	202.229	26.4444	17.1195	4.31048	15.52		Itgb7	integrin beta 7 [Source:MGI Symbol;Acc:MGI:96616]	1006.02	5608.01	-2.47942	9.07957e-67	7.91008e-65	795.939	1039.09	1237.78	951.265	5826.29	6231.73	4986.4	5387.59		Clcf1	cardiotrophin-like cytokine factor 1 [Source:MGI Symbol;Acc:MGI:1930088]	239.597	55.8738	2.08141	2.43469e-07	1.50645e-05	214.584	345.958	167.977	229.868	86.6081	60.3202	17.5683	58.9986		Herc3	hect domain and RLD 3 [Source:MGI Symbol;Acc:MGI:1921248]
ENSMUSG00000120878	novel transcript	-2.17725	34.3068	155.326	2.217e-12	1.48613e-10	34.7465	20.6175	44.2628	37.6005	103.374	177.187	140.091	200.652		Ptpn7	protein tyrosine phosphatase, non-receptor type 7 [Source:MGI Symbol;Acc:MGI:2156893]	335.526	2513.42	-2.9058	9.24415e-67	8.02606e-65	302.293	281.155	428.286	330.368	2877.46	2849.51	2254.54	2072.15		Pax5	paired box 5 [Source:MGI Symbol;Acc:MGI:97489]	2533.29	492.891	2.36458	2.56118e-07	1.57964e-05	2648.25	3404.38	1844.16	2236.36	403.028	191.928	1092.43	284.177		Arhgap27os3	Rho GTPase activating protein 27, opposite strand 3 [Source:MGI Symbol;Acc:MGI:3650159]
Gm36043	predicted gene, 36043 [Source:MGI Symbol;Acc:MGI:5595202]	-2.38768	28.4734	149.232	2.38078e-12	1.5863e-10	32.6407	39.1733	11.5926	30.4869	102.572	178.899	171.342	144.115		Vasp	vasodilator-stimulated phosphoprotein [Source:MGI Symbol;Acc:MGI:109268]	2119.9	7601.5	-1.8423	1.33603e-66	1.15605e-64	2066.17	2130.05	2170.97	2112.41	8394.83	8331.72	7099.15	6580.29		Gm50237	predicted gene, 50237 [Source:MGI Symbol;Acc:MGI:6303043]	0	13.3961	-6.28547	2.60704e-07	1.60279e-05	0	0	0	0	10.2901	17.3649	11.1798	14.7496		Rmdn3	regulator of microtubule dynamics 3 [Source:MGI Symbol;Acc:MGI:1915059]
Ighv1-55	immunoglobulin heavy variable 1-55 [Source:MGI Symbol;Acc:MGI:4439716]	-1.39835	267.788	705.836	3.16084e-12	2.08098e-10	201.109	232.978	395.204	241.862	684.35	691.627	825.457	621.91		Actr3	ARP3 actin-related protein 3 [Source:MGI Symbol;Acc:MGI:1921367]	6352.59	19789.1	-1.63924	1.5262e-66	1.31614e-64	6438.25	6263.67	6583.06	6125.41	21599.1	21278.4	18229	18049.8		Gm30211	predicted gene, 30211 [Source:MGI Symbol;Acc:MGI:5589370]	192.233	52.878	1.84227	2.64914e-07	1.61837e-05	140.502	157.702	239.839	230.89	85.7506	53.0086	25.5539	47.1989		Sh3pxd2a	SH3 and PX domains 2A [Source:MGI Symbol;Acc:MGI:1298393]
Mast4	microtubule associated serine/threonine kinase family member 4 [Source:MGI Symbol;Acc:MGI:1918885]	1.30799	500.974	202.588	3.46928e-12	2.27053e-10	582.267	521.624	359.372	540.634	165.879	215.705	240.309	188.458		Arhgdib	Rho, GDP dissociation inhibitor (GDI) beta [Source:MGI Symbol;Acc:MGI:101940]	2390.96	9318.8	-1.96261	5.60975e-66	4.82137e-64	2231.46	2478.53	2666.64	2187.23	10131.4	10176.4	8780.05	8187.42		Gm5960	predicted gene 5960 [Source:MGI Symbol;Acc:MGI:3779540]	102.344	358.19	-1.80683	2.69515e-07	1.64123e-05	67.2705	130.104	107.793	104.207	156.066	431.381	439.208	406.107		Zbtb4	zinc finger and BTB domain containing 4 [Source:MGI Symbol;Acc:MGI:1922830]
Sod2	superoxide dismutase 2, mitochondrial [Source:MGI Symbol;Acc:MGI:98352]	-1.28688	1373.6	3351.68	3.53391e-12	2.30601e-10	1339.32	1327.77	1654.59	1172.73	2564.31	4035.92	2475.29	4331.2		Ecm2	extracellular matrix protein 2, female organ and adipocyte specific [Source:MGI Symbol;Acc:MGI:3039578]	2626.23	743.276	1.82092	8.10227e-66	6.94022e-64	2702.77	2363.89	2547.57	2890.72	712.636	796.852	725.177	738.44		Aspa	aspartoacylase [Source:MGI Symbol;Acc:MGI:87914]	23.1928	88.212	-1.90963	2.7592e-07	1.66863e-05	28.9519	17.7414	21.5586	24.5193	58.3104	73.1154	143.741	77.6815		Ube2s	ubiquitin-conjugating enzyme E2S [Source:MGI Symbol;Acc:MGI:1925141]
Per1	period circadian clock 1 [Source:MGI Symbol;Acc:MGI:1098283]	-1.1102	812.932	1754.94	3.80096e-12	2.45851e-10	713.883	737.077	1052.82	747.944	1920.03	1420.92	2063.64	1615.19		Ifi207	interferon activated gene 207 [Source:MGI Symbol;Acc:MGI:2138302]	668.004	3219.29	-2.26976	1.76745e-65	1.50889e-63	592.673	555.031	742.117	782.194	3244.89	3386.62	2979.72	3265.93		Gm8848	predicted gene 8848 [Source:MGI Symbol;Acc:MGI:3647327]	24.1133	1.31448	4.01646	2.76616e-07	1.66863e-05	19.5851	21.684	29.6431	25.5409	3.43002	1.82788	0	0		Rasgrp2	RAS, guanyl releasing protein 2 [Source:MGI Symbol;Acc:MGI:1333849]
Klra9	killer cell lectin-like receptor subfamily A, member 9 [Source:MGI Symbol;Acc:MGI:1321153]	4.1613	46.0845	2.53642	4.18176e-12	2.69693e-10	57.9108	37.1116	53.7477	35.568	3.20539	2.56792	2.15524	2.21715		Tcirg1	T cell, immune regulator 1, ATPase, H+ transporting, lysosomal V0 protein A3 [Source:MGI Symbol;Acc:MGI:1350931]	2957.07	11326.5	-1.93778	4.06444e-65	3.45829e-63	2553.86	2836.12	3116.15	3322.14	10703.6	11527.9	10455.5	12619.1		Whrn	whirlin [Source:MGI Symbol;Acc:MGI:2682003]	106.947	25.6714	2.10337	3.00643e-07	1.80707e-05	80.8949	132.075	109.59	105.229	24.0102	17.3649	49.5108	11.7997		Retreg1	reticulophagy regulator 1 [Source:MGI Symbol;Acc:MGI:1913520]
Cyp4v3	cytochrome P450, family 4, subfamily v, polypeptide 3 [Source:MGI Symbol;Acc:MGI:2142763]	-1.4124	304.919	811.773	4.22419e-12	2.71245e-10	308.507	263.905	367.803	279.463	553.731	1021.18	678.901	993.282		H2-DMb1	histocompatibility 2, class II, locus Mb1 [Source:MGI Symbol;Acc:MGI:95922]	1232.72	6639.47	-2.42941	1.30238e-64	1.10447e-62	1074.41	1269.29	1556.23	1030.94	7226.99	7030.78	6231.11	6068.98		Gh	growth hormone [Source:MGI Symbol;Acc:MGI:95707]	34.9965	2.98861	3.68611	3.01444e-07	1.80707e-05	41.7248	56.1812	13.4741	28.6058	0.857506	2.74183	6.38849	1.96662		Amd1	S-adenosylmethionine decarboxylase 1 [Source:MGI Symbol;Acc:MGI:88004]
Stat1	signal transducer and activator of transcription 1 [Source:MGI Symbol;Acc:MGI:103063]	-1.39057	1998.9	5240.81	4.23035e-12	2.71245e-10	1684.68	1650.43	3045.7	1614.79	4248.74	5783.82	4548.63	6382.06		Psme1	proteasome (prosome, macropain) activator subunit 1 (PA28 alpha) [Source:MGI Symbol;Acc:MGI:1096367]	2288.48	8767.15	-1.93764	2.50725e-64	2.11921e-62	2381.86	1885.29	2632.48	2254.27	9203.42	8503.42	8838.5	8523.27		Sirpb1c	signal-regulatory protein beta 1C [Source:MGI Symbol;Acc:MGI:3807521]	177.933	72.4107	1.30636	3.15324e-07	1.8844e-05	156.681	228.667	152.707	173.678	81.463	63.062	91.0359	54.082		Bora	bora, aurora kinase A activator [Source:MGI Symbol;Acc:MGI:1924994]
Pdgfc	platelet-derived growth factor, C polypeptide [Source:MGI Symbol;Acc:MGI:1859631]	-2.38838	35.683	186.861	4.57424e-12	2.92447e-10	47.3816	24.741	42.1551	28.4544	102.572	238.817	143.323	262.732		Pgd	phosphogluconate dehydrogenase [Source:MGI Symbol;Acc:MGI:97553]	2394.74	6972.24	-1.54176	3.76903e-64	3.17519e-62	2319.32	2453.97	2511.57	2294.11	7590.92	7187.07	6489.79	6621.2		Gm32051	predicted gene, 32051 [Source:MGI Symbol;Acc:MGI:5591210]	40.2295	210.998	-2.39283	3.2214e-07	1.91918e-05	34.061	43.3679	46.7103	36.7789	71.173	404.876	130.964	236.978		Ddx5	DEAD box helicase 5 [Source:MGI Symbol;Acc:MGI:105037]
Serping1	serine (or cysteine) peptidase inhibitor, clade G, member 1 [Source:MGI Symbol;Acc:MGI:894696]	-1.41074	1410.44	3750.03	4.71374e-12	3.00497e-10	1361.43	1280.35	1709.39	1290.61	2718.17	4893.6	2557.19	4831.17		Plbd1	phospholipase B domain containing 1 [Source:MGI Symbol;Acc:MGI:1914107]	1296.98	6072.05	-2.22709	6.55595e-64	5.50484e-62	1239.7	1268.38	1420.54	1259.28	6702.75	6960.34	5825.23	4799.86		Rbpms	RNA binding protein gene with multiple splicing [Source:MGI Symbol;Acc:MGI:1334446]	299.393	147.517	1.02422	3.33483e-07	1.98062e-05	248.646	306.532	299.126	343.27	167.214	136.177	167.698	118.981		Marchf1	membrane associated ring-CH-type finger 1 [Source:MGI Symbol;Acc:MGI:1920175]
Gm42870	predicted gene 42870 [Source:MGI Symbol;Acc:MGI:5663007]	2.62493	128.698	20.9358	4.80246e-12	3.05274e-10	129.51	149.477	57.9632	177.84	21.6364	17.1195	16.1643	28.8229		Scimp	SLP adaptor and CSK interacting membrane protein [Source:MGI Symbol;Acc:MGI:3610314]	34.1862	435.665	-3.67809	7.13985e-64	5.97547e-62	26.8043	43.6746	33.2291	33.0368	472.75	467.765	429.694	372.449		Bcar3	breast cancer anti-estrogen resistance 3 [Source:MGI Symbol;Acc:MGI:1352501]	172.343	80.3685	1.10062	3.47083e-07	2.03625e-05	178.82	212.897	153.605	144.051	87.4656	75.8572	81.4532	76.6982		Tjp1	tight junction protein 1 [Source:MGI Symbol;Acc:MGI:98759]
Klk1	kallikrein 1 [Source:MGI Symbol;Acc:MGI:102850]	2.80093	148.524	20.8763	4.83934e-12	3.06737e-10	185.315	150.508	118.034	140.24	38.4646	26.5352	11.8538	6.65144		Arpc1b	actin related protein 2/3 complex, subunit 1B [Source:MGI Symbol;Acc:MGI:1343142]	5841.03	17888.4	-1.61475	1.1352e-63	9.46967e-62	5646.78	5717.73	6020.93	5978.68	19593.4	19200.4	16415	16344.7		Egr3	early growth response 3 [Source:MGI Symbol;Acc:MGI:1306780]	87.9622	21.9407	1.96486	3.57933e-07	2.09353e-05	109.847	86.7359	74.5568	80.7093	21.4376	26.5043	6.38849	33.4325		Samd9l	sterile alpha motif domain containing 9-like [Source:MGI Symbol;Acc:MGI:1343184]
Atp1b1	ATPase, Na+/K+ transporting, beta 1 polypeptide [Source:MGI Symbol;Acc:MGI:88108]	1.43629	2449.58	905.23	5.22501e-12	3.30236e-10	2786.04	2687.5	1585.03	2739.75	755.67	1085.37	634.718	1145.16		Pdcd1lg2	programmed cell death 1 ligand 2 [Source:MGI Symbol;Acc:MGI:1930125]	7.60579	395.721	-5.69068	1.28061e-63	1.06479e-61	8.19021	4.54944	14.7685	2.91501	411.901	428.143	411.294	331.544		Igkv17-121	immunoglobulin kappa variable 17-121 [Source:MGI Symbol;Acc:MGI:3647671]	44	201.738	-2.20116	3.70916e-07	2.16289e-05	58.7553	38.4398	28.7448	50.0602	312.99	169.993	70.2733	253.694		Fgd3	FYVE, RhoGEF and PH domain containing 3 [Source:MGI Symbol;Acc:MGI:1353657]
Olfr56	olfactory receptor 56 [Source:MGI Symbol;Acc:MGI:1333785]	-2.60077	48.8048	295.973	5.27817e-12	3.32645e-10	37.9053	36.0807	93.7951	27.4382	166.68	370.637	221.99	424.584		Gbp11	guanylate binding protein 11 [Source:MGI Symbol;Acc:MGI:3646307]	112.691	1047.05	-3.21929	1.37367e-63	1.13845e-61	87.8586	121.015	130.147	111.742	939.649	816.663	1221.98	1209.92		Cd200r4	CD200 receptor 4 [Source:MGI Symbol;Acc:MGI:3036289]	50.4526	125.502	-1.30662	3.7432e-07	2.17603e-05	43.4278	48.2961	53.8965	56.19	104.616	131.608	164.503	101.281		Ube2l6	ubiquitin-conjugating enzyme E2L 6 [Source:MGI Symbol;Acc:MGI:1914500]
Clec2i	C-type lectin domain family 2, member i [Source:MGI Symbol;Acc:MGI:2136650]	1.06232	694.991	333.377	5.30536e-12	3.33409e-10	743.365	754.602	555.393	726.603	288.485	311.574	400.875	332.572		Cd209f	CD209f antigen [Source:MGI Symbol;Acc:MGI:1916392]	435.925	13.5806	5.00574	1.80761e-63	1.49324e-61	346.222	384.882	532.589	480.005	14.0421	17.61	11.9059	10.7644		Tapbpl	TAP binding protein-like [Source:MGI Symbol;Acc:MGI:2384853]	528.935	1187.09	-1.16774	3.75431e-07	2.17603e-05	510.064	470.148	576.692	558.835	1196.22	1519.89	749.05	1283.22		Nup85	nucleoporin 85 [Source:MGI Symbol;Acc:MGI:3046173]
Cbx7	chromobox 7 [Source:MGI Symbol;Acc:MGI:1196439]	1.07093	1324.39	630.51	5.56756e-12	3.4791e-10	1374.07	1424.67	964.297	1534.5	595.401	671.939	547.431	707.27		Parp14	poly (ADP-ribose) polymerase family, member 14 [Source:MGI Symbol;Acc:MGI:1919489]	2700.86	10640.9	-1.9782	3.18828e-63	2.62529e-61	2612.68	2347.51	3197.38	2645.86	10657.9	11032.7	11392.9	9480.23		Cd300ld	CD300 molecule like family member d [Source:MGI Symbol;Acc:MGI:2442358]	601.942	300.238	1.00157	3.7911e-07	2.19075e-05	506.658	641.648	589.268	670.194	388.45	263.215	290.676	258.611		P2ry10	purinergic receptor P2Y, G-protein coupled 10 [Source:MGI Symbol;Acc:MGI:1926076]
Gm17334	predicted gene, 17334 [Source:MGI Symbol;Acc:MGI:4936968]	-1.62463	60.1573	185.385	5.9797e-12	3.71564e-10	45.2757	48.4512	72.7175	74.1847	197.131	198.586	156.255	189.566		Ifi205	interferon activated gene 205 [Source:MGI Symbol;Acc:MGI:101847]	119.183	2251.24	-4.24469	3.81848e-63	3.1341e-61	51.3749	119.195	164.3	141.864	2442.15	2160.52	2295.67	2106.6		Serpina3n	serine (or cysteine) peptidase inhibitor, clade A, member 3N [Source:MGI Symbol;Acc:MGI:105045]	2.39473	39.9222	-4.08589	4.07689e-07	2.34885e-05	0	3.94254	3.5931	2.04327	29.1552	77.6851	9.58273	43.2656		Sh3kbp1	SH3-domain kinase binding protein 1 [Source:MGI Symbol;Acc:MGI:1889583]
Ighv1-22	immunoglobulin heavy variable 1-22 [Source:MGI Symbol;Acc:MGI:4439784]	-1.23113	127.107	298.392	6.32741e-12	3.92069e-10	137.933	102.057	146.489	121.947	291.69	295.311	264.017	342.549		Il4ra	interleukin 4 receptor, alpha [Source:MGI Symbol;Acc:MGI:105367]	1484.16	6341.25	-2.09486	3.95957e-63	3.23949e-61	1584.43	1380.3	1520.23	1451.67	7455.18	6701.7	5954.03	5254.12		Col3a1	collagen, type III, alpha 1 [Source:MGI Symbol;Acc:MGI:88453]	104.722	28.1069	1.88069	4.1559e-07	2.38722e-05	117.511	67.0232	108.691	125.661	39.4453	16.451	19.1655	37.3658		Zfp608	zinc finger protein 608 [Source:MGI Symbol;Acc:MGI:2442338]
Gbp4	guanylate binding protein 4 [Source:MGI Symbol;Acc:MGI:97072]	-3.06055	532.523	4442.64	6.47557e-12	4.00129e-10	504.351	383.486	893.688	348.566	2984.21	5604.92	2848.15	6333.28		Rinl	Ras and Rab interactor-like [Source:MGI Symbol;Acc:MGI:2444024]	471.531	2304.56	-2.2888	4.1011e-63	3.34456e-61	465.353	490.429	507.667	422.676	2625.87	2562.25	1954.73	2075.38		Ms4a4d	membrane-spanning 4-domains, subfamily A, member 4D [Source:MGI Symbol;Acc:MGI:1913857]	53.1484	118.836	-1.16473	4.53572e-07	2.58227e-05	61.3099	49.2817	45.812	56.19	134.628	128.866	108.604	103.248		Fmnl1	formin-like 1 [Source:MGI Symbol;Acc:MGI:1888994]
Gbp8	guanylate-binding protein 8 [Source:MGI Symbol;Acc:MGI:1923324]	-2.981	191.483	1511.63	6.52071e-12	4.00712e-10	149.515	136.076	360.426	119.915	1206.83	1777.86	1043.14	2018.71		Snx10	sorting nexin 10 [Source:MGI Symbol;Acc:MGI:1919232]	749.785	3724.46	-2.31255	5.40026e-63	4.39003e-61	684.999	917.167	761.501	635.472	4260.6	3698.1	3422.4	3516.74		Tnfrsf19	tumor necrosis factor receptor superfamily, member 19 [Source:MGI Symbol;Acc:MGI:1352474]	274.004	115.809	1.24056	4.5967e-07	2.60927e-05	259.715	216.84	309.905	309.556	150.063	80.4269	111.798	120.947		Siglecg	sialic acid binding Ig-like lectin G [Source:MGI Symbol;Acc:MGI:2443630]
Rrm2b	ribonucleotide reductase M2 B (TP53 inducible) [Source:MGI Symbol;Acc:MGI:2155865]	1.02077	1102.26	543.254	6.58373e-12	4.03431e-10	1146.63	1291.69	803.054	1167.65	524.081	571.791	553.897	523.247		Litaf	LPS-induced TN factor [Source:MGI Symbol;Acc:MGI:1929512]	1134.14	4887.69	-2.10753	6.41711e-63	5.2001e-61	1152.59	1021.8	1124.25	1237.91	5805.23	5048.56	4406.26	4290.7		Procr	protein C receptor, endothelial [Source:MGI Symbol;Acc:MGI:104596]	17.2956	70.4557	-2.0275	4.63652e-07	2.62413e-05	15.3275	10.842	21.5586	21.4544	39.4453	96.8778	63.8849	81.6147		Dgkd	diacylglycerol kinase, delta [Source:MGI Symbol;Acc:MGI:2138334]
Cd3g	CD3 antigen, gamma polypeptide [Source:MGI Symbol;Acc:MGI:88333]	-1.28918	239.342	584.93	6.69057e-12	4.08845e-10	302.189	183.496	288.762	182.921	536.101	570.079	589.458	644.082		1600014C10Rik	RIKEN cDNA 1600014C10 gene [Source:MGI Symbol;Acc:MGI:1919494]	528.575	2456.41	-2.21479	9.353e-63	7.55521e-61	615.01	523.185	561.203	414.903	2525.23	2524.83	2455.86	2319.73		Ighg3	Immunoglobulin heavy constant gamma 3 [Source:MGI Symbol;Acc:MGI:2144790]	892.004	3186.37	-1.8371	4.67111e-07	2.63596e-05	830.238	522.386	1209.08	1006.31	4446.17	3305.73	1341.58	3652.01		Atp7b	ATPase, Cu++ transporting, beta polypeptide [Source:MGI Symbol;Acc:MGI:103297]
Col27a1	collagen, type XXVII, alpha 1 [Source:MGI Symbol;Acc:MGI:2672118]	1.1753	300.451	133.195	7.25495e-12	4.40065e-10	307.454	327.819	241.338	325.193	122.606	136.1	145.479	128.595		Trbc1	T cell receptor beta, constant region 1 [Source:MGI Symbol;Acc:MGI:4439726]	78.4291	827.289	-3.40346	1.08159e-62	8.70935e-61	56.5869	88.2591	95.9952	72.8752	988.797	886.002	689.459	744.898		Gm13919	predicted gene 13919 [Source:MGI Symbol;Acc:MGI:3651616]	159.516	53.8199	1.59166	5.34687e-07	2.99098e-05	137.947	154.745	170.672	174.7	42.0178	29.2461	83.0503	60.9652		Tlr9	toll-like receptor 9 [Source:MGI Symbol;Acc:MGI:1932389]
Rpgrip1	retinitis pigmentosa GTPase regulator interacting protein 1 [Source:MGI Symbol;Acc:MGI:1932134]	1.49487	276.628	98.267	7.2673e-12	4.40065e-10	305.348	330.912	191.806	278.447	98.5656	87.3093	119.616	87.5774		Cdc42bpa	CDC42 binding protein kinase alpha [Source:MGI Symbol;Acc:MGI:2441841]	3771.56	1323.73	1.51032	1.23696e-62	9.9291e-61	3573.16	3539.46	4017.95	3955.67	1293.04	1324.05	1313.98	1363.85		Fmn2	formin 2 [Source:MGI Symbol;Acc:MGI:1859252]	30.362	4.12198	2.87879	5.47611e-07	3.0544e-05	28.1004	31.5403	26.05	35.7573	0.857506	4.56971	3.19424	7.86648		Scoc	short coiled-coil protein [Source:MGI Symbol;Acc:MGI:1927654]
H2-M2	histocompatibility 2, M region locus 2 [Source:MGI Symbol;Acc:MGI:95914]	-3.16134	10.1441	90.7391	7.28104e-12	4.40065e-10	2.10585	8.24702	21.0775	9.14606	67.3131	104.429	96.9858	94.2288		H2-Q7	histocompatibility 2, Q region locus 7 [Source:MGI Symbol;Acc:MGI:95936]	407.503	3708.54	-3.18782	1.57188e-62	1.2578e-60	257.619	375.784	522.436	474.175	3559.67	4251.71	3563.11	3459.69		Ephx1	epoxide hydrolase 1, microsomal [Source:MGI Symbol;Acc:MGI:95405]	296.087	88.2033	1.73281	6.10205e-07	3.39369e-05	248.646	301.604	300.024	334.075	92.6106	119.726	30.3453	110.131		1700001L05Rik	RIKEN cDNA 1700001L05 gene [Source:MGI Symbol;Acc:MGI:1916541]
Prune2	prune homolog 2 [Source:MGI Symbol;Acc:MGI:1925004]	-1.8799	56.2279	207.061	7.61298e-12	4.57627e-10	61.0696	69.0688	35.8318	58.9412	170.687	251.656	148.712	257.189		Fes	feline sarcoma oncogene [Source:MGI Symbol;Acc:MGI:95514]	1634.74	5380.36	-1.71897	1.8153e-62	1.44804e-60	1486.15	1777.01	1672.53	1603.26	5113.66	5860.82	4924.71	5622.26		Sema3a	sema domain, immunoglobulin domain (Ig), short basic domain, secreted, (semaphorin) 3A [Source:MGI Symbol;Acc:MGI:107558]	24.6235	72.7616	-1.57676	6.23043e-07	3.44586e-05	22.9912	33.5116	21.5586	20.4327	86.6081	78.599	51.1079	74.7316		Eng	endoglin [Source:MGI Symbol;Acc:MGI:95392]
Lig4	ligase IV, DNA, ATP-dependent [Source:MGI Symbol;Acc:MGI:1335098]	1.37628	535.758	206.304	8.67986e-12	5.17539e-10	606.484	649.453	339.348	547.747	191.522	237.961	193.972	201.76		Il10ra	interleukin 10 receptor, alpha [Source:MGI Symbol;Acc:MGI:96538]	983.718	4971.72	-2.33828	1.8702e-62	1.48718e-60	777.325	908.978	1159.33	1089.24	4670.16	5480.01	4588.1	5148.62		Pex11a	peroxisomal biogenesis factor 11 alpha [Source:MGI Symbol;Acc:MGI:1338788]	37.2418	106.836	-1.52923	6.23167e-07	3.44586e-05	42.5763	42.3823	32.3379	31.6707	107.188	142.575	65.482	112.097		Ifih1	interferon induced with helicase C domain 1 [Source:MGI Symbol;Acc:MGI:1918836]
Meg3	maternally expressed 3 [Source:MGI Symbol;Acc:MGI:1202886]	-5.58821	10.682	513.454	8.79214e-12	5.22825e-10	13.688	4.12351	14.7543	10.1623	948.794	833.719	126.082	145.223		Sema6d	sema domain, transmembrane domain (TM), and cytoplasmic domain, (semaphorin) 6D [Source:MGI Symbol;Acc:MGI:2387661]	3411.1	746.439	2.19184	2.17736e-62	1.72607e-60	3125.68	2992.62	3438.29	4087.82	729.018	661.475	783.624	811.638		Cttnbp2nl	CTTNBP2 N-terminal like [Source:MGI Symbol;Acc:MGI:1933137]	43.0131	142.506	-1.73214	6.31914e-07	3.48422e-05	46.8339	46.3248	20.6603	58.2333	120.051	200.153	135.755	114.064		Fam189b	family with sequence similarity 189, member B [Source:MGI Symbol;Acc:MGI:1915771]
Slc25a53	solute carrier family 25, member 53 [Source:MGI Symbol;Acc:MGI:1914312]	1.09959	294.509	137.336	9.98714e-12	5.92294e-10	290.607	312.356	252.93	322.144	135.428	146.372	141.168	126.377		C5ar1	complement component 5a receptor 1 [Source:MGI Symbol;Acc:MGI:88232]	327.061	2484.8	-2.92601	2.30281e-62	1.81986e-60	288.146	300.263	427.363	292.473	3055.32	2652.5	2146.31	2085.07		Klra8	killer cell lectin-like receptor, subfamily A, member 8 [Source:MGI Symbol;Acc:MGI:102968]	37.2087	4.99897	3.00153	6.48567e-07	3.55765e-05	28.1004	58.1525	27.8465	34.7357	0.857506	3.65577	9.58273	5.89986		St3gal5	ST3 beta-galactoside alpha-2,3-sialyltransferase 5 [Source:MGI Symbol;Acc:MGI:1339963]
Slc13a3	solute carrier family 13 (sodium-dependent dicarboxylate transporter), member 3 [Source:MGI Symbol;Acc:MGI:2149635]	-3.85369	34.867	504.037	1.00435e-11	5.94044e-10	22.1114	18.5558	63.2326	35.568	200.337	688.203	379.322	748.287		Cst7	cystatin F (leukocystatin) [Source:MGI Symbol;Acc:MGI:1298217]	54.6898	869.582	-3.99624	2.63887e-62	2.079e-60	34.9945	71.8811	71.0734	40.8101	932.628	821.065	1017.41	707.223		Nanos1	nanos C2HC-type zinc finger 1 [Source:MGI Symbol;Acc:MGI:2669254]	166.943	70.3702	1.23551	6.52817e-07	3.5688e-05	169.454	134.046	196.722	167.548	85.7506	83.1687	57.4964	55.0654		Prkacb	protein kinase, cAMP dependent, catalytic, beta [Source:MGI Symbol;Acc:MGI:97594]
Myo10	myosin X [Source:MGI Symbol;Acc:MGI:107716]	-1.06076	393.511	820.932	1.02496e-11	6.04617e-10	432.752	356.683	372.019	412.589	692.364	975.81	682.134	933.419		Apobr	apolipoprotein B receptor [Source:MGI Symbol;Acc:MGI:2176230]	319.567	1603.7	-2.32899	4.37371e-62	3.43518e-60	272.511	368.504	279.678	357.575	1497.82	1757.7	1561.84	1597.44		Rcn1	reticulocalbin 1 [Source:MGI Symbol;Acc:MGI:104559]	567.124	1229.16	-1.11424	6.66521e-07	3.63339e-05	544.977	510.559	585.675	627.285	926.964	1185.38	1747.25	1057.06		Col5a1	collagen, type V, alpha 1 [Source:MGI Symbol;Acc:MGI:88457]
Gm12678	predicted gene 12678 [Source:MGI Symbol;Acc:MGI:3650923]	3.14078	63.9127	7.19676	1.10634e-11	6.50886e-10	87.3927	75.254	43.209	49.7952	9.61616	5.99182	4.31048	8.86859		Emilin2	elastin microfibril interfacer 2 [Source:MGI Symbol;Acc:MGI:2389136]	522.954	3063.93	-2.55099	4.96969e-62	3.8913e-60	466.842	533.194	597.201	494.58	3771.47	3294.17	2661.51	2528.56		Fgf13	fibroblast growth factor 13 [Source:MGI Symbol;Acc:MGI:109178]	51.5754	11.3866	2.16962	6.68434e-07	3.63352e-05	51.0915	27.5978	60.1844	67.428	12.0051	8.22548	9.58273	15.733		Mmp14	matrix metallopeptidase 14 (membrane-inserted) [Source:MGI Symbol;Acc:MGI:101900]
Rgl1	ral guanine nucleotide dissociation stimulator,-like 1 [Source:MGI Symbol;Acc:MGI:107484]	-1.0685	714.782	1499.27	1.18128e-11	6.93133e-10	825.493	659.761	709.259	664.613	1230.07	1702.53	1222.02	1842.45		AU020206	expressed sequence AU020206 [Source:MGI Symbol;Acc:MGI:2142134]	993.306	4828.95	-2.28205	6.79485e-62	5.30414e-60	828.7	986.318	1122.41	1035.8	4450.17	5451.39	4082.64	5331.62		Myh4	myosin, heavy polypeptide 4, skeletal muscle [Source:MGI Symbol;Acc:MGI:1339713]	0.757227	25.0205	-5.1342	6.78679e-07	3.67882e-05	0	0.985635	0	2.04327	36.8727	9.13942	25.5539	28.516		Zhx2	zinc fingers and homeoboxes 2 [Source:MGI Symbol;Acc:MGI:2683087]
Cyp4b1-ps2	cytochrome P450, family 4, subfamily b, polypeptide 1, pseudogene 2 [Source:MGI Symbol;Acc:MGI:3649236]	2.01033	167.312	41.5547	1.20682e-11	7.06247e-10	260.072	141.23	132.789	135.158	45.6768	35.0949	35.5615	49.8858		Lrrc25	leucine rich repeat containing 25 [Source:MGI Symbol;Acc:MGI:2445284]	267.354	2737.09	-3.35688	8.53379e-62	6.64126e-60	207.733	249.309	383.058	229.314	3370.1	2911.15	2501.32	2165.8		Cx3cr1	chemokine (C-X3-C motif) receptor 1 [Source:MGI Symbol;Acc:MGI:1333815]	1004.4	297.247	1.76181	7.13384e-07	3.84528e-05	762.967	1202.47	1043.8	1008.36	289.837	179.133	543.021	176.996		Fads2	fatty acid desaturase 2 [Source:MGI Symbol;Acc:MGI:1930079]
Psmb8	proteasome (prosome, macropain) subunit, beta type 8 (large multifunctional peptidase 7) [Source:MGI Symbol;Acc:MGI:1346527]	-1.34522	2872.35	7297.63	1.24015e-11	7.22219e-10	2542.81	2209.17	4461.06	2276.35	6352.27	8143.74	6432.31	8262.2		Marchf1	membrane associated ring-CH-type finger 1 [Source:MGI Symbol;Acc:MGI:1920175]	384.339	2850.72	-2.89198	1.09038e-61	8.45989e-60	298.57	480.421	359.982	398.385	3529.24	2970.58	2538.12	2364.94		Slc22a12	solute carrier family 22 (organic anion/cation transporter), member 12 [Source:MGI Symbol;Acc:MGI:1195269]	23.8828	0.857506	4.59012	7.57737e-07	4.07294e-05	24.6942	31.5403	18.8638	20.4327	3.43002	0	0	0		Cpm	carboxypeptidase M [Source:MGI Symbol;Acc:MGI:1917824]
Des	desmin [Source:MGI Symbol;Acc:MGI:94885]	-5.57739	455.916	21768.8	1.34284e-11	7.7966e-10	867.61	167.002	581.74	207.311	4202.26	36781.2	6198.47	39893.1		Skap2	src family associated phosphoprotein 2 [Source:MGI Symbol;Acc:MGI:1889206]	1087.9	4400.59	-2.01598	1.57221e-61	1.21613e-59	1116.85	1024.53	1112.25	1097.99	4993.13	4874.66	3999.3	3735.26		Krt80	keratin 80 [Source:MGI Symbol;Acc:MGI:1921377]	457.495	132.281	1.78085	8.22337e-07	4.39562e-05	424.911	446.493	533.575	425.001	222.951	111.501	51.1079	143.563		Mtfr2	mitochondrial fission regulator 2 [Source:MGI Symbol;Acc:MGI:1919054]
Il15ra	interleukin 15 receptor, alpha chain [Source:MGI Symbol;Acc:MGI:104644]	-1.40685	260.231	690.17	1.42303e-11	8.24053e-10	212.691	259.781	351.995	216.457	513.663	806.327	594.846	845.842		Ncf4	neutrophil cytosolic factor 4 [Source:MGI Symbol;Acc:MGI:109186]	444.503	3277.15	-2.8841	1.69896e-61	1.3102e-59	304.527	406.72	500.283	566.484	3181.7	3563.82	2998.12	3364.96		Aldh1a7	aldehyde dehydrogenase family 1, subfamily A7 [Source:MGI Symbol;Acc:MGI:1347050]	440.781	146.222	1.58485	9.5608e-07	5.06828e-05	435.981	270.064	515.61	541.468	197.226	124.296	81.4532	181.912		Plk4	polo like kinase 4 [Source:MGI Symbol;Acc:MGI:101783]
Gm20743	predicted gene, 20743 [Source:MGI Symbol;Acc:MGI:5434099]	3.05974	83.1711	9.87062	1.53291e-11	8.82628e-10	93.7103	72.1614	61.1249	105.688	8.01347	17.1195	2.15524	12.1943		Ifitm3	interferon induced transmembrane protein 3 [Source:MGI Symbol;Acc:MGI:1913391]	5420.91	20175.8	-1.89595	2.47765e-61	1.90495e-59	5907.37	4513.04	5631.41	5631.8	21968.8	17793.8	20315.8	20624.6		Gm6525	predicted pseudogene 6525 [Source:MGI Symbol;Acc:MGI:3648757]	48.2187	9.94936	2.23613	9.65531e-07	5.10431e-05	48.537	57.1668	42.2189	44.952	13.7201	4.56971	4.79136	16.7163		Pced1b	PC-esterase domain containing 1B [Source:MGI Symbol;Acc:MGI:2446270]
Smagp	small cell adhesion glycoprotein [Source:MGI Symbol;Acc:MGI:2448476]	-1.83478	99.6337	355.315	1.53695e-11	8.82628e-10	101.081	97.9333	123.304	76.2171	257.232	485.337	223.067	455.624		Alox5ap	arachidonate 5-lipoxygenase activating protein [Source:MGI Symbol;Acc:MGI:107505]	473.45	2134.99	-2.17398	3.73691e-61	2.86451e-59	411.744	482.24	516.897	482.92	2237.37	2103.29	1794.54	2404.77		Ppp1r16b	protein phosphatase 1, regulatory subunit 16B [Source:MGI Symbol;Acc:MGI:2151841]	490.212	240.964	1.02011	1.0049e-06	5.26902e-05	469.191	499.717	513.813	478.126	335.285	202.895	204.432	221.245		Itpr3	inositol 1,4,5-triphosphate receptor 3 [Source:MGI Symbol;Acc:MGI:96624]
Asb2	ankyrin repeat and SOCS box-containing 2 [Source:MGI Symbol;Acc:MGI:1929743]	-1.82049	238.237	841.544	1.54014e-11	8.82628e-10	226.379	167.002	330.917	228.651	518.471	1093.93	578.682	1175.09		Cd3g	CD3 antigen, gamma polypeptide [Source:MGI Symbol;Acc:MGI:88333]	98.9181	1828.29	-4.20794	6.51113e-61	4.97614e-59	84.8803	126.474	134.763	49.5552	2291.2	1953.61	1467.67	1600.67		Sulf2	sulfatase 2 [Source:MGI Symbol;Acc:MGI:1919293]	461.119	218.889	1.06833	1.00822e-06	5.27208e-05	435.13	457.335	469.798	482.213	304.414	187.358	164.503	219.278		Arhgap26	Rho GTPase activating protein 26 [Source:MGI Symbol;Acc:MGI:1918552]
Btla	B and T lymphocyte associated [Source:MGI Symbol;Acc:MGI:2658978]	1.06856	1306.47	622.897	1.67166e-11	9.55522e-10	1569.91	1417.46	960.082	1278.42	700.377	530.704	654.115	606.39		Themis2	thymocyte selection associated family member 2 [Source:MGI Symbol;Acc:MGI:2446213]	674.582	6035.68	-3.16227	8.79853e-61	6.70422e-59	446.739	764.306	836.266	651.019	6927.43	6843.68	5729.98	4641.62		Dcn	decorin [Source:MGI Symbol;Acc:MGI:94872]	82.9333	171.113	-1.05135	1.02815e-06	5.36169e-05	68.9736	97.5778	91.624	73.5579	184.364	189.186	143.741	167.163		Abhd5	abhydrolase domain containing 5 [Source:MGI Symbol;Acc:MGI:1914719]
Olfml3	olfactomedin-like 3 [Source:MGI Symbol;Acc:MGI:1914877]	-1.51203	250.51	714.208	1.68526e-11	9.60816e-10	331.671	187.62	257.146	225.603	613.03	940.715	483.851	819.236		Tlr1	toll-like receptor 1 [Source:MGI Symbol;Acc:MGI:1341295]	234.853	2188.7	-3.22223	1.52913e-60	1.16168e-58	158.592	324.83	234.45	221.541	2334.5	2521.53	1954.73	1944.06		Scarf1	scavenger receptor class F, member 1 [Source:MGI Symbol;Acc:MGI:2449455]	171.087	443.08	-1.36993	1.04952e-06	5.45834e-05	165.196	210.926	121.267	186.96	342.145	352.782	664.402	412.99		Pfkm	phosphofructokinase, muscle [Source:MGI Symbol;Acc:MGI:97548]
Ly6a	lymphocyte antigen 6 complex, locus A [Source:MGI Symbol;Acc:MGI:107527]	-3.18679	739.098	6729.94	1.69599e-11	9.64447e-10	614.908	463.895	1382.69	494.903	4244.73	8391.11	4633.77	9650.14		Irf1	interferon regulatory factor 1 [Source:MGI Symbol;Acc:MGI:96590]	2503.54	14544.8	-2.5388	2.89935e-60	2.1961e-58	1936.61	2107.3	2759.86	3210.4	15585.5	13690.7	14080.3	14822.6		Apol9a	apolipoprotein L 9a [Source:MGI Symbol;Acc:MGI:3606001]	1.15368	23.0075	-4.30098	1.0524e-06	5.45858e-05	0	0	3.5931	1.02164	16.2926	17.3649	23.9568	34.4158		Sash3	SAM and SH3 domain containing 3 [Source:MGI Symbol;Acc:MGI:1921381]
Prdm1	PR domain containing 1, with ZNF domain [Source:MGI Symbol;Acc:MGI:99655]	-1.1301	143.196	313.652	1.70046e-11	9.64507e-10	156.886	126.798	155.974	133.126	268.451	328.694	306.044	351.418		Zc3h12d	zinc finger CCCH type containing 12D [Source:MGI Symbol;Acc:MGI:3045313]	100.933	1004.39	-3.31906	5.68784e-60	4.29549e-58	69.2445	117.376	120.917	96.1953	1161.98	1111.63	806.353	937.581		Gm8828	predicted gene 8828 [Source:MGI Symbol;Acc:MGI:3643936]	14.055	0	6.17744	1.06247e-06	5.496e-05	10.2183	7.88508	12.5758	25.5409	0	0	0	0		Grk6	G protein-coupled receptor kinase 6 [Source:MGI Symbol;Acc:MGI:1347078]
Cd300c	CD300C molecule [Source:MGI Symbol;Acc:MGI:3032626]	1.64788	171.257	54.8349	1.76396e-11	9.97967e-10	196.897	153.601	175.997	158.532	60.101	35.9509	68.9677	54.3201		Cd300lf	CD300 molecule like family member F [Source:MGI Symbol;Acc:MGI:2442359]	284.245	4030.35	-3.82683	6.90692e-60	5.20077e-58	221.136	381.243	180.914	353.688	3499.99	3335.99	3752.52	5532.91		Bcl2a1a	B cell leukemia/lymphoma 2 related protein A1a [Source:MGI Symbol;Acc:MGI:102687]	28.2456	103.127	-1.85316	1.07697e-06	5.55608e-05	34.061	31.5403	26.9482	20.4327	59.1679	80.4269	167.698	105.214		Maml2	mastermind like transcriptional coactivator 2 [Source:MGI Symbol;Acc:MGI:2389460]
Dab2	disabled 2, mitogen-responsive phosphoprotein [Source:MGI Symbol;Acc:MGI:109175]	-1.67664	309.829	990.771	1.83941e-11	1.038e-09	388.529	289.676	288.762	272.349	570.559	1185.52	739.247	1467.75		Gpr174	G protein-coupled receptor 174 [Source:MGI Symbol;Acc:MGI:2685222]	49.9405	447.717	-3.16792	7.00925e-60	5.2623e-58	46.163	48.224	47.0746	58.3002	454.027	489.778	376.659	470.405		Clca3a1	chloride channel accessory 3A1 [Source:MGI Symbol;Acc:MGI:1316732]	338.057	873.13	-1.37051	1.08965e-06	5.60646e-05	392.553	303.576	333.26	322.837	1049.59	1094.9	442.403	905.628		Nfkb1	nuclear factor of kappa light polypeptide gene enhancer in B cells 1, p105 [Source:MGI Symbol;Acc:MGI:97312]
Il12rb2	interleukin 12 receptor, beta 2 [Source:MGI Symbol;Acc:MGI:1270861]	-1.40282	82.1397	217.492	1.98712e-11	1.11284e-09	91.6044	78.3467	87.4718	71.136	166.68	228.545	221.99	252.755		Batf	basic leucine zipper transcription factor, ATF-like [Source:MGI Symbol;Acc:MGI:1859147]	94.3199	907.774	-3.26359	9.08901e-60	6.8037e-58	113.174	62.7822	107.072	94.252	1098.79	902.511	798.777	831.014		Steap4	STEAP family member 4 [Source:MGI Symbol;Acc:MGI:1923560]	323.407	95.6799	1.74409	1.11272e-06	5.7033e-05	356.789	291.748	301.82	343.27	135.486	91.3942	31.9424	123.897		Orc2	origin recognition complex, subunit 2 [Source:MGI Symbol;Acc:MGI:1328306]
Ache	acetylcholinesterase [Source:MGI Symbol;Acc:MGI:87876]	1.21219	2135.95	921.485	2.01416e-11	1.12513e-09	2102.69	2466.89	1586.08	2388.14	1161.95	820.879	1030.2	672.904		Lcp1	lymphocyte cytosolic protein 1 [Source:MGI Symbol;Acc:MGI:104808]	5257.4	28276	-2.42724	2.04439e-59	1.52588e-57	4349	5479.34	5996.01	5205.24	33595.7	31620.9	25360.6	22526.7		Gm12216	predicted gene 12216 [Source:MGI Symbol;Acc:MGI:3650088]	27.9367	112.627	-1.9975	1.1144e-06	5.7033e-05	40.0217	21.684	22.4569	27.5842	58.3104	91.3942	191.655	109.147		Slc25a38	solute carrier family 25, member 38 [Source:MGI Symbol;Acc:MGI:2384782]
Igkj5	immunoglobulin kappa joining 5 [Source:MGI Symbol;Acc:MGI:1316738]	1.99048	158.541	39.8606	2.36817e-11	1.30966e-09	138.986	207.206	95.9028	192.067	39.266	42.7987	46.3377	31.0401		Abracl	ABRA C-terminal like [Source:MGI Symbol;Acc:MGI:1920362]	195.187	1043.67	-2.41926	2.7613e-59	2.05496e-57	184.652	208.364	202.144	185.589	1066.03	1001.57	874.541	1232.53		Trib3	tribbles pseudokinase 3 [Source:MGI Symbol;Acc:MGI:1345675]	30.183	117.499	-1.96758	1.13291e-06	5.78267e-05	23.8427	29.569	30.5413	36.7789	62.5979	194.67	75.0647	137.663		Hk3	hexokinase 3 [Source:MGI Symbol;Acc:MGI:2670962]
Irgm2	immunity-related GTPase family M member 2 [Source:MGI Symbol;Acc:MGI:1926262]	-2.29431	1335.64	6551.49	2.6224e-11	1.44304e-09	1080.3	1072.11	2139.37	1050.78	5119.8	7763.68	5069.12	8253.33		Trappc14	trafficking protein particle complex 14 [Source:MGI Symbol;Acc:MGI:2385896]	973.933	2871.88	-1.56006	3.00637e-59	2.23083e-57	991.76	1001.79	873.187	1029	2825.97	3041.02	2835.77	2784.76		Epha2	Eph receptor A2 [Source:MGI Symbol;Acc:MGI:95278]	298.477	137.795	1.10979	1.14567e-06	5.83231e-05	326.134	288.791	284.753	294.231	196.369	111.501	121.381	121.93		Swap70	SWA-70 protein [Source:MGI Symbol;Acc:MGI:1298390]
Cd86	CD86 antigen [Source:MGI Symbol;Acc:MGI:101773]	-1.12703	252.194	551.059	2.67847e-11	1.47023e-09	254.808	264.935	262.415	226.619	407.885	659.956	536.655	599.739		Ctla4	cytotoxic T-lymphocyte-associated protein 4 [Source:MGI Symbol;Acc:MGI:88556]	32.6949	1110.88	-5.09156	5.19464e-59	3.84343e-57	31.2717	22.7472	18.4606	58.3002	966.563	970.75	832.33	1673.87		1700027J07Rik	RIKEN cDNA 1700027J07 gene [Source:MGI Symbol;Acc:MGI:1916693]	46.8165	8.64746	2.35047	1.2326e-06	6.24183e-05	45.1309	58.1525	43.1172	40.8655	13.7201	10.0534	0	10.8164		Dpp4	dipeptidylpeptidase 4 [Source:MGI Symbol;Acc:MGI:94919]
Klrd1	killer cell lectin-like receptor, subfamily D, member 1 [Source:MGI Symbol;Acc:MGI:1196275]	1.62742	305.137	98.6231	2.76771e-11	1.51546e-09	464.34	218.546	286.655	251.008	104.175	104.429	89.4425	96.4459		Gm36043	predicted gene, 36043 [Source:MGI Symbol;Acc:MGI:5595202]	40.8272	1112.41	-4.7762	6.45137e-59	4.75947e-57	21.5924	40.0351	61.8431	39.8385	963.053	843.078	942.73	1700.78		Ifi205	interferon activated gene 205 [Source:MGI Symbol;Acc:MGI:101847]	86.2859	322.116	-1.89577	1.25531e-06	6.34015e-05	84.3011	95.6066	76.3534	88.8824	156.924	286.064	621.28	224.195		Smarca2	SWI/SNF related, matrix associated, actin dependent regulator of chromatin, subfamily a, member 2 [Source:MGI Symbol;Acc:MGI:99603]
Gucy1a1	guanylate cyclase 1, soluble, alpha 1 [Source:MGI Symbol;Acc:MGI:1926562]	1.35299	249.537	97.7614	2.87693e-11	1.56837e-09	205.32	303.078	225.53	264.219	85.7441	110.421	85.132	109.749		Cd40	CD40 antigen [Source:MGI Symbol;Acc:MGI:88336]	182.127	1442.24	-2.98889	7.29938e-59	5.36957e-57	122.853	199.265	198.452	207.937	1555.16	1650.94	1349.69	1213.15		Cd160	CD160 antigen [Source:MGI Symbol;Acc:MGI:1860383]	51.3874	120.924	-1.24655	1.25984e-06	6.34638e-05	41.7248	49.2817	51.2017	63.3415	129.483	147.145	91.0359	116.031		Cobll1	Cobl-like 1 [Source:MGI Symbol;Acc:MGI:2442894]
G530011O06Rik	RIKEN cDNA G530011O06 gene [Source:MGI Symbol;Acc:MGI:3603513]	-2.74856	12.7002	85.1204	2.88534e-11	1.56837e-09	7.37047	10.3088	16.862	16.2597	101.771	117.268	56.0362	65.4059		Vav1	vav 1 oncogene [Source:MGI Symbol;Acc:MGI:98923]	731.942	4943.23	-2.75662	7.76301e-59	5.69421e-57	523.429	821.629	721.81	860.899	5582.9	5641.8	4371.62	4176.6		Zbtb10	zinc finger and BTB domain containing 10 [Source:MGI Symbol;Acc:MGI:2139883]	119.312	51.1433	1.22381	1.37285e-06	6.8796e-05	127.729	150.802	107.793	90.9257	46.3053	52.0947	51.1079	55.0654		Sfxn3	sideroflexin 3 [Source:MGI Symbol;Acc:MGI:2137679]
Ighv9-3	immunoglobulin heavy variable V9-3 [Source:MGI Symbol;Acc:MGI:3642720]	-1.16801	266.96	599.498	3.01642e-11	1.63145e-09	235.855	235.04	353.049	243.895	709.993	529.848	628.253	529.898		Snx20	sorting nexin 20 [Source:MGI Symbol;Acc:MGI:1918857]	264.5	1792.56	-2.76275	1.52165e-58	1.11294e-56	190.608	338.478	270.448	258.464	1880.47	1976.72	1728.52	1584.52		Stxbp6	syntaxin binding protein 6 (amisyn) [Source:MGI Symbol;Acc:MGI:2384963]	217.586	103.684	1.06528	1.39379e-06	6.96641e-05	240.982	255.279	192.231	181.851	123.481	85.9105	94.2302	111.114		Mthfd1	methylenetetrahydrofolate dehydrogenase (NADP+ dependent), methenyltetrahydrofolate cyclohydrolase, formyltetrahydrofolate synthase [Source:MGI Symbol;Acc:MGI:1342005]
Wars	tryptophanyl-tRNA synthetase [Source:MGI Symbol;Acc:MGI:104630]	-1.04187	1494.16	3076.31	3.12993e-11	1.68871e-09	1231.92	1433.95	1846.39	1464.39	2678.1	3585.67	2478.53	3562.96		Sp140	Sp140 nuclear body protein [Source:MGI Symbol;Acc:MGI:3702467]	405.66	2082.79	-2.36177	1.5562e-58	1.13496e-56	329.842	451.304	368.289	473.203	2250.24	2261.78	1953.65	1865.47		Chp2	calcineurin-like EF hand protein 2 [Source:MGI Symbol;Acc:MGI:1917511]	86.749	14.1064	2.57086	1.49432e-06	7.44953e-05	81.7465	66.0375	104.2	95.0122	30.8702	8.22548	1.59712	15.733		Carns1	carnosine synthase 1 [Source:MGI Symbol;Acc:MGI:2147595]
Igll1	immunoglobulin lambda-like polypeptide 1 [Source:MGI Symbol;Acc:MGI:96529]	1.90507	603.844	160.685	3.14347e-11	1.69037e-09	653.866	654.607	376.234	730.668	238.801	190.026	78.6663	135.246		Nrros	negative regulator of reactive oxygen species [Source:MGI Symbol;Acc:MGI:2445095]	925.721	3594.68	-1.95761	1.78481e-58	1.29798e-56	851.037	964.481	877.803	1009.56	4062.84	3874.2	3197.27	3244.4		Mybpc2	myosin binding protein C, fast-type [Source:MGI Symbol;Acc:MGI:1336170]	46.9556	13.3315	1.84326	1.53719e-06	7.64346e-05	43.4278	52.2386	43.1172	49.0386	6.86004	12.7952	15.9712	17.6996		Isg20	interferon-stimulated protein [Source:MGI Symbol;Acc:MGI:1928895]
Mrc1	mannose receptor, C type 1 [Source:MGI Symbol;Acc:MGI:97142]	-1.18092	956.996	2169.77	3.14829e-11	1.69037e-09	985.537	808.208	1273.08	761.155	1788.61	2405.29	1856.74	2628.43		Arhgap30	Rho GTPase activating protein 30 [Source:MGI Symbol;Acc:MGI:2684948]	1561.05	7374.25	-2.2405	2.42129e-58	1.75585e-56	1238.21	1681.47	1522.08	1802.45	7640.06	8489.11	6608.85	6758.98		Tdrp	testis development related protein [Source:MGI Symbol;Acc:MGI:1919398]	27.7834	2.94856	3.11533	1.60518e-06	7.94048e-05	23.8427	28.5834	18.8638	39.8438	3.43002	6.39759	0	1.96662		Recql4	RecQ protein-like 4 [Source:MGI Symbol;Acc:MGI:1931028]
Trac	T cell receptor alpha constant [Source:MGI Symbol;Acc:MGI:4439838]	-1.4075	223.087	591.913	3.1765e-11	1.70139e-09	274.813	161.848	267.685	188.002	480.808	624.005	495.705	767.133		Pik3r5	phosphoinositide-3-kinase regulatory subunit 5 [Source:MGI Symbol;Acc:MGI:2443588]	452.186	3340.7	-2.88555	3.48924e-58	2.52313e-56	374.516	587.787	477.207	369.235	3859.23	3835.67	2835.77	2832.12		Nacad	NAC alpha domain containing [Source:MGI Symbol;Acc:MGI:3603030]	58.1167	166.127	-1.5093	1.70258e-06	8.40071e-05	36.6156	66.0375	66.4723	63.3415	128.626	138.005	252.345	145.53		Hpn	hepsin [Source:MGI Symbol;Acc:MGI:1196620]
Ccl12	chemokine (C-C motif) ligand 12 [Source:MGI Symbol;Acc:MGI:108224]	-3.76619	6.04296	81.7574	3.28564e-11	1.75136e-09	7.37047	1.03088	14.7543	1.01623	71.3199	104.429	59.2691	92.0116		Lpcat2	lysophosphatidylcholine acyltransferase 2 [Source:MGI Symbol;Acc:MGI:3606214]	709.133	2978.39	-2.06971	5.3682e-58	3.87087e-56	772.858	646.93	791.961	624.784	3162.98	3100.46	3131.25	2518.88		Adam19	a disintegrin and metallopeptidase domain 19 (meltrin beta) [Source:MGI Symbol;Acc:MGI:105377]	1305.11	440.415	1.56391	1.71136e-06	8.40094e-05	1204.91	1428.18	1305.19	1282.15	709.157	479.819	198.043	374.641		Msn	moesin [Source:MGI Symbol;Acc:MGI:97167]
Trpc6	transient receptor potential cation channel, subfamily C, member 6 [Source:MGI Symbol;Acc:MGI:109523]	1.50537	172.873	60.4828	3.39736e-11	1.80656e-09	162.15	177.311	153.866	198.165	69.7172	72.7578	49.5705	49.8858		Nabp1	nucleic acid binding protein 1 [Source:MGI Symbol;Acc:MGI:1923258]	534.666	2159.57	-2.01453	6.71277e-58	4.82676e-56	472.798	601.436	599.97	464.458	2285.35	2162.73	2099.77	2090.45		2010007H06Rik	RIKEN cDNA 2010007H06 gene [Source:MGI Symbol;Acc:MGI:1917099]	78.6643	17.3937	2.15962	1.71889e-06	8.41644e-05	112.401	76.8795	46.7103	78.6661	31.7277	14.6231	14.3741	8.84979		Malt1	MALT1 paracaspase [Source:MGI Symbol;Acc:MGI:2445027]
Il27	interleukin 27 [Source:MGI Symbol;Acc:MGI:2384409]	-1.66963	87.4385	278.359	3.7395e-11	1.98083e-09	53.6991	76.2849	121.196	98.5742	208.35	319.278	292.035	293.772		Inpp5j	inositol polyphosphate 5-phosphatase J [Source:MGI Symbol;Acc:MGI:2158663]	44.3103	1433.77	-5.0244	7.80385e-58	5.59553e-56	15.6358	55.5031	70.1504	35.9518	1482.61	1124.84	1288	1839.64		Gm17334	predicted gene, 17334 [Source:MGI Symbol;Acc:MGI:4936968]	12.9359	54.0193	-2.07758	1.75778e-06	8.585e-05	8.51526	17.7414	15.2707	10.2164	73.7455	69.4596	33.5395	39.3324		Cd40	CD40 antigen [Source:MGI Symbol;Acc:MGI:88336]
Arntl	aryl hydrocarbon receptor nuclear translocator-like [Source:MGI Symbol;Acc:MGI:1096381]	1.24349	698.068	294.543	3.74299e-11	1.98083e-09	753.894	784.497	507.969	745.912	322.141	320.99	206.903	328.138		Cxcl16	chemokine (C-X-C motif) ligand 16 [Source:MGI Symbol;Acc:MGI:1932682]	911.301	4421.7	-2.27889	1.35261e-57	9.67136e-56	829.445	933.545	920.262	961.953	5207.27	5035.35	3851.01	3593.16		Capsl	calcyphosine-like [Source:MGI Symbol;Acc:MGI:1922818]	35.0846	6.53626	2.50536	1.77163e-06	8.63075e-05	28.1004	43.3679	34.1344	34.7357	4.28753	1.82788	11.1798	8.84979		Gm45552	predicted gene 45552 [Source:MGI Symbol;Acc:MGI:5791388]
Cfb	complement factor B [Source:MGI Symbol;Acc:MGI:105975]	-3.35089	8.89146	90.4487	3.90432e-11	2.06128e-09	7.37047	8.24702	17.9159	2.03246	60.101	132.676	59.2691	109.749		Bid	BH3 interacting domain death agonist [Source:MGI Symbol;Acc:MGI:108093]	191.317	920.006	-2.26382	1.69991e-57	1.21206e-55	204.011	201.995	189.221	170.042	1009.86	982.857	884.283	803.026		Acta1	actin alpha 1, skeletal muscle [Source:MGI Symbol;Acc:MGI:87902]	24.9559	113.338	-2.1901	1.86102e-06	9.03981e-05	15.3275	19.7127	34.1344	30.6491	206.659	59.4062	70.2733	117.014		Ephx2	epoxide hydrolase 2, cytoplasmic [Source:MGI Symbol;Acc:MGI:99500]
Ccl5	chemokine (C-C motif) ligand 5 [Source:MGI Symbol;Acc:MGI:98262]	-3.0405	544.1	4476.55	3.94544e-11	2.07754e-09	704.406	336.066	818.862	317.063	2654.86	5807.78	2985.01	6458.55		Cfb	complement factor B [Source:MGI Symbol;Acc:MGI:105975]	28.5061	523.92	-4.19527	2.00687e-57	1.42695e-55	33.5054	15.4681	37.8443	27.2068	597.959	603.142	404.8	489.781		Slc41a2	solute carrier family 41, member 2 [Source:MGI Symbol;Acc:MGI:2442940]	124.972	59.8001	1.04749	1.86499e-06	9.03981e-05	133.69	129.118	118.572	118.51	62.5979	71.2875	46.3165	58.9986		Txk	TXK tyrosine kinase [Source:MGI Symbol;Acc:MGI:102960]
Itpr3	inositol 1,4,5-triphosphate receptor 3 [Source:MGI Symbol;Acc:MGI:96624]	1.0285	1775.44	870.328	3.95391e-11	2.07754e-09	1907.9	2038.04	1206.69	1949.13	871.064	885.933	909.511	814.802		B4galnt1	beta-1,4-N-acetyl-galactosaminyl transferase 1 [Source:MGI Symbol;Acc:MGI:1342057]	471.916	2465.87	-2.38583	3.33003e-57	2.36118e-55	426.635	481.331	585.202	394.498	2293.54	2886.94	2256.71	2426.3		Gm35028	predicted gene, 35028 [Source:MGI Symbol;Acc:MGI:5594187]	0	10.7209	-5.9683	1.94544e-06	9.40606e-05	0	0	0	0	11.1476	10.9673	7.98561	12.783		Phf21a	PHD finger protein 21A [Source:MGI Symbol;Acc:MGI:2384756]
Gpr12	G-protein coupled receptor 12 [Source:MGI Symbol;Acc:MGI:101909]	4.91525	54.4069	1.64366	4.27044e-11	2.23854e-09	33.6936	65.9761	30.5624	87.3956	4.00673	2.56792	0	0		Sh3bgrl3	SH3 domain binding glutamic acid-rich protein-like 3 [Source:MGI Symbol;Acc:MGI:1920973]	1777.56	7086.54	-1.9955	4.19469e-57	2.96603e-55	1553.91	1696.94	2066.67	1792.73	7044.45	6991.16	6167.25	8143.29		Gbp11	guanylate binding protein 11 [Source:MGI Symbol;Acc:MGI:3646307]	2.0552	21.8103	-3.38734	1.98193e-06	9.55847e-05	4.25763	0	0.898275	3.06491	17.1501	23.7625	20.7626	25.5661		H2-Aa	histocompatibility 2, class II antigen A, alpha [Source:MGI Symbol;Acc:MGI:95895]
Clec4n	C-type lectin domain family 4, member n [Source:MGI Symbol;Acc:MGI:1861231]	-1.72099	72.4788	238.847	4.31177e-11	2.25486e-09	72.6518	56.6982	113.819	46.7465	215.562	238.817	233.844	267.166		Phldb2	pleckstrin homology like domain, family B, member 2 [Source:MGI Symbol;Acc:MGI:2444981]	4406.22	1573.21	1.48595	5.36085e-57	3.78014e-55	4198.6	4253.72	4738.84	4433.73	1722.5	1513.36	1557.51	1499.48		Bcl7a	B cell CLL/lymphoma 7A [Source:MGI Symbol;Acc:MGI:1924295]	1589.35	624.744	1.34455	1.9907e-06	9.57674e-05	1603.42	1254.71	1799.24	1700	859.221	675.403	324.216	640.135		Sh2d2a	SH2 domain containing 2A [Source:MGI Symbol;Acc:MGI:1351596]
Sectm1a	secreted and transmembrane 1A [Source:MGI Symbol;Acc:MGI:2384805]	-3.67485	8.32102	106.263	4.5102e-11	2.34753e-09	3.15877	1.03088	17.9159	11.1785	61.7037	140.38	72.2005	150.766		Havcr2	hepatitis A virus cellular receptor 2 [Source:MGI Symbol;Acc:MGI:2159682]	114.684	727.413	-2.66984	6.64606e-57	4.67348e-55	87.8586	127.384	118.148	125.345	738.38	811.16	694.871	665.241		Smim41	small integral membrane protein 41 [Source:MGI Symbol;Acc:MGI:1924967]	26.5902	4.7599	2.40734	2.02991e-06	9.73115e-05	26.3973	27.5978	27.8465	24.5193	5.14503	6.39759	1.59712	5.89986		Ces2g	carboxylesterase 2G [Source:MGI Symbol;Acc:MGI:1919611]
Pf4	platelet factor 4 [Source:MGI Symbol;Acc:MGI:1888711]	1.08874	1601.59	752.696	4.54665e-11	2.36095e-09	1152.95	1610.23	1962.32	1680.84	754.067	873.093	613.166	770.459		Stat2	signal transducer and activator of transcription 2 [Source:MGI Symbol;Acc:MGI:103039]	2186.43	7314.37	-1.74254	8.53853e-57	5.98776e-55	1947.78	2020.86	2372.19	2404.88	6816.26	7499.65	7984.52	6957.05		Irf4	interferon regulatory factor 4 [Source:MGI Symbol;Acc:MGI:1096873]	779.894	339.129	1.19978	2.07262e-06	9.89663e-05	556.898	680.088	1103.08	779.509	433.898	328.105	303.453	291.06		Slfn8	schlafen 8 [Source:MGI Symbol;Acc:MGI:2672859]
Gp9	glycoprotein 9 (platelet) [Source:MGI Symbol;Acc:MGI:1860137]	1.36763	580.278	224.338	4.55898e-11	2.36181e-09	519.092	610.279	532.208	659.532	283.677	232.825	248.93	131.92		Ly75	lymphocyte antigen 75 [Source:MGI Symbol;Acc:MGI:106662]	216.452	1377.78	-2.67186	1.2399e-56	8.67113e-55	173.483	229.292	266.756	196.277	1575.05	1495.75	1189.51	1250.83		Insrr	insulin receptor-related receptor [Source:MGI Symbol;Acc:MGI:1346037]	3.4202	27.2339	-3.03249	2.09206e-06	9.94678e-05	0	6.89944	2.69482	4.08655	25.7252	27.4183	22.3597	33.4325		Mpp1	membrane protein, palmitoylated [Source:MGI Symbol;Acc:MGI:105941]
Tmem163	transmembrane protein 163 [Source:MGI Symbol;Acc:MGI:1919410]	1.67622	164.667	51.617	5.61603e-11	2.88912e-09	168.468	185.558	107.495	197.148	51.2862	47.9345	48.4929	58.7544		Unc93b1	unc-93 homolog B1, TLR signaling regulator [Source:MGI Symbol;Acc:MGI:1859307]	3093.51	16083	-2.37841	2.0928e-56	1.45958e-54	2536.73	2796.99	3751.2	3289.1	17847.5	18414.5	14542.5	13527.7		Clec4n	C-type lectin domain family 4, member n [Source:MGI Symbol;Acc:MGI:1861231]	45.2056	113.133	-1.32072	2.09346e-06	9.94678e-05	32.358	50.2674	51.2017	46.9953	80.6055	128.866	130.964	112.097		Prkcb	protein kinase C, beta [Source:MGI Symbol;Acc:MGI:97596]
Sidt1	SID1 transmembrane family, member 1 [Source:MGI Symbol;Acc:MGI:2443155]	1.62444	178.523	58.1144	5.69352e-11	2.92219e-09	207.426	186.589	169.674	150.402	50.4848	51.3584	84.0544	46.5601		Saa3	serum amyloid A 3 [Source:MGI Symbol;Acc:MGI:98223]	15.3881	55173.5	-11.8059	2.43206e-56	1.69157e-54	16.3804	7.2791	36.9212	0.97167	67792.8	46102.9	41005	65793.2		Mmp11	matrix metallopeptidase 11 [Source:MGI Symbol;Acc:MGI:97008]	87.8851	24.9049	1.78132	2.10757e-06	9.98914e-05	103.035	80.8221	80.8447	86.8391	34.3002	21.9346	7.98561	35.3992		Cyth3	cytohesin 3 [Source:MGI Symbol;Acc:MGI:1335107]
Actn3	actinin alpha 3 [Source:MGI Symbol;Acc:MGI:99678]	-4.77816	316.287	8678.24	6.0649e-11	3.10559e-09	591.744	144.323	387.827	141.256	2638.83	13567.2	3574.47	14932.5		Irgm2	immunity-related GTPase family M member 2 [Source:MGI Symbol;Acc:MGI:1926262]	2264.44	14675.2	-2.69604	2.44267e-56	1.69434e-54	2410.9	1864.36	2896.47	1886.01	16899.6	13687.4	16599	11514.7		Igkv8-27	immunoglobulin kappa chain variable 8-27 [Source:MGI Symbol;Acc:MGI:4439868]	52.3431	362.655	-2.79505	2.27389e-06	0.000106984	27.2488	27.5978	79.9465	74.5795	597.681	382.942	51.1079	418.89		Trbc1	T cell receptor beta, constant region 1 [Source:MGI Symbol;Acc:MGI:4439726]
Cd74	CD74 antigen (invariant polypeptide of major histocompatibility complex, class II antigen-associated) [Source:MGI Symbol;Acc:MGI:96534]	-1.15984	20443.2	45676.9	6.18889e-11	3.16177e-09	20508.9	17934.2	24798.8	18530.9	34757.6	55283.1	34386.9	58280		Tgtp2	T cell specific GTPase 2 [Source:MGI Symbol;Acc:MGI:3710083]	640.951	5722.81	-3.15857	5.05656e-56	3.49793e-54	619.477	400.351	903.647	640.33	6556.48	5218.06	5965.93	5150.78		Pla2g4c	phospholipase A2, group IVC (cytosolic, calcium-independent) [Source:MGI Symbol;Acc:MGI:1196403]	195.786	394.88	-1.01277	2.32264e-06	0.000109011	229.06	133.061	207.501	213.522	409.888	380.2	344.978	444.456		Stap1	signal transducing adaptor family member 1 [Source:MGI Symbol;Acc:MGI:1926193]
Plat	plasminogen activator, tissue [Source:MGI Symbol;Acc:MGI:97610]	-2.41448	38.2361	203.824	6.45318e-11	3.28163e-09	68.4401	40.2042	16.862	27.4382	165.077	236.249	137.935	276.035		Nckap1l	NCK associated protein 1 like [Source:MGI Symbol;Acc:MGI:1926063]	1839.72	9070.37	-2.30199	7.28831e-56	5.02815e-54	1449.67	1923.5	2214.35	1771.35	9934.77	10184.1	8250.78	7911.85		Ighd	immunoglobulin heavy constant delta [Source:MGI Symbol;Acc:MGI:96447]	1666.95	319.943	2.37975	2.41296e-06	0.0001127	1545.52	2190.08	1315.97	1616.23	90.0381	675.403	135.755	378.574		Sphk1	sphingosine kinase 1 [Source:MGI Symbol;Acc:MGI:1316649]
C2	complement component 2 (within H-2S) [Source:MGI Symbol;Acc:MGI:88226]	-2.28561	33.9245	165.451	6.64835e-11	3.35772e-09	35.7994	21.6484	56.9094	21.3408	116.997	156.643	148.712	239.452		Ucp2	uncoupling protein 2 (mitochondrial, proton carrier) [Source:MGI Symbol;Acc:MGI:109354]	8302.47	24509.2	-1.56174	1.7506e-55	1.20447e-53	7751.66	8589.34	9004.17	7864.7	26244.7	26278.5	23534.7	21978.8		Gm34225	predicted gene, 34225 [Source:MGI Symbol;Acc:MGI:5593384]	23.5117	1.83758	3.56168	2.48412e-06	0.000115743	24.6942	37.4541	20.6603	11.238	2.57252	1.82788	0	2.94993		App	amyloid beta (A4) precursor protein [Source:MGI Symbol;Acc:MGI:88059]
9530082P21Rik	RIKEN cDNA 9530082P21 gene [Source:MGI Symbol;Acc:MGI:3603340]	-2.15519	28.333	126.029	6.91251e-11	3.48318e-09	17.8997	27.8337	43.209	24.3895	121.805	157.499	85.132	139.68		Ptk2b	PTK2 protein tyrosine kinase 2 beta [Source:MGI Symbol;Acc:MGI:104908]	1535.4	6220.05	-2.01798	1.83061e-55	1.25613e-53	1718.45	1450.36	1392.85	1579.94	7028.06	6948.24	5431.25	5472.63		Islr2	immunoglobulin superfamily containing leucine-rich repeat 2 [Source:MGI Symbol;Acc:MGI:2444277]	44.2806	5.36002	3.00342	2.58447e-06	0.000119838	27.2488	74.9082	26.9482	48.0169	1.71501	7.31154	1.59712	10.8164		Orai2	ORAI calcium release-activated calcium modulator 2 [Source:MGI Symbol;Acc:MGI:2443195]
Gpat3	glycerol-3-phosphate acyltransferase 3 [Source:MGI Symbol;Acc:MGI:3603816]	1.11563	405.671	187.562	7.01653e-11	3.52756e-09	401.164	416.474	346.726	458.319	199.535	143.804	190.739	216.172		Mapkapk2	MAP kinase-activated protein kinase 2 [Source:MGI Symbol;Acc:MGI:109298]	2103.19	8079.25	-1.9415	2.89447e-55	1.98081e-53	2193.49	2102.75	2018.67	2097.84	9354.37	8765.37	7696.61	6500.64		Batf3	basic leucine zipper transcription factor, ATF-like 3 [Source:MGI Symbol;Acc:MGI:1925491]	49.1811	133.691	-1.43319	2.62239e-06	0.000121237	42.5763	58.1525	44.9137	51.0819	91.7531	113.329	202.834	126.847		Oaf	out at first homolog [Source:MGI Symbol;Acc:MGI:94852]
Gm4951	predicted gene 4951 [Source:MGI Symbol;Acc:MGI:3644953]	-3.94754	102.234	1577.01	7.79824e-11	3.91168e-09	60.0167	48.4512	246.607	53.8601	1229.27	2048.35	1172.45	1857.97		Tnip1	TNFAIP3 interacting protein 1 [Source:MGI Symbol;Acc:MGI:1926194]	1258.2	4050.5	-1.68687	4.11219e-55	2.80662e-53	1206.94	1149.19	1425.16	1251.51	4397.51	4194.48	3859.67	3750.33		Gfra1	glial cell line derived neurotrophic factor family receptor alpha 1 [Source:MGI Symbol;Acc:MGI:1100842]	211.107	57.998	1.84682	2.71083e-06	0.000124795	173.711	166.572	256.907	247.236	108.903	49.3529	25.5539	48.1822		Dock8	dedicator of cytokinesis 8 [Source:MGI Symbol;Acc:MGI:1921396]
Arg1	arginase, liver [Source:MGI Symbol;Acc:MGI:88070]	-4.68336	14.2781	366.891	7.94893e-11	3.97824e-09	2.10585	14.4323	26.3469	14.2272	150.653	545.255	228.455	543.201		ENSMUSG00000120992	novel transcript	1178.09	5341.5	-2.18099	4.28522e-55	2.91692e-53	1076.64	1157.38	1334.7	1143.66	5477.58	6610.35	4572.94	4705.13		Stat1	signal transducer and activator of transcription 1 [Source:MGI Symbol;Acc:MGI:103063]	1869.14	4567.63	-1.2887	2.77267e-06	0.000127035	2030.89	2163.47	1490.24	1791.95	2715.72	4395.15	6821.31	4338.36		Orc6	origin recognition complex, subunit 6 [Source:MGI Symbol;Acc:MGI:1929285]
Themis	thymocyte selection associated [Source:MGI Symbol;Acc:MGI:2443552]	-1.81761	57.5791	203.195	8.09048e-11	4.03084e-09	66.3342	57.7291	72.7175	33.5355	144.242	184.034	229.533	254.972		Rhbdf2	rhomboid 5 homolog 2 [Source:MGI Symbol;Acc:MGI:2442473]	707.194	2759.54	-1.96474	4.55906e-55	3.09507e-53	690.956	579.598	725.502	832.721	2722.99	2950.77	2648.52	2715.86		Dbp	D site albumin promoter binding protein [Source:MGI Symbol;Acc:MGI:94866]	83.8708	32.6085	1.36797	2.83234e-06	0.000129322	99.6285	62.095	96.1154	77.6444	38.5877	30.1601	35.1367	26.5494		Kif24	kinesin family member 24 [Source:MGI Symbol;Acc:MGI:1918345]
Gm47730	predicted gene, 47730 [Source:MGI Symbol;Acc:MGI:6096864]	5.18756	43.4068	1.24576	8.53199e-11	4.23175e-09	63.1755	41.2351	31.6163	37.6005	0.801347	0.855974	0	3.32572		Prickle1	prickle planar cell polarity protein 1 [Source:MGI Symbol;Acc:MGI:1916034]	1255.34	356.746	1.81538	5.15145e-55	3.48795e-53	1379.68	1223.8	1265.48	1152.4	344.031	356.602	348.518	377.831		Psmb10	proteasome (prosome, macropain) subunit, beta type 10 [Source:MGI Symbol;Acc:MGI:1096380]	1885.68	7623.27	-2.0151	2.83605e-06	0.000129322	1835.89	2099.4	1829.79	1777.65	3235.37	4874.05	16900.7	5482.94		Sdc4	syndecan 4 [Source:MGI Symbol;Acc:MGI:1349164]
Stk39	serine/threonine kinase 39 [Source:MGI Symbol;Acc:MGI:1858416]	-1.12646	377.342	824.162	8.71328e-11	4.312e-09	345.359	379.363	458.436	326.209	623.448	916.748	755.412	1001.04		Fth1	ferritin heavy polypeptide 1 [Source:MGI Symbol;Acc:MGI:95588]	34438.6	165079	-2.26106	7.61765e-55	5.14413e-53	33680.4	33643.1	33881.7	36549.4	201835	142046	128189	188246		Gm13994	predicted gene 13994 [Source:MGI Symbol;Acc:MGI:3651835]	2.39836	21.5012	-3.18033	2.89087e-06	0.000131511	1.70305	0.985635	1.79655	5.10819	23.1526	21.9346	27.1511	13.7663		Hmbs	hydroxymethylbilane synthase [Source:MGI Symbol;Acc:MGI:96112]
Ifit1	interferon-induced protein with tetratricopeptide repeats 1 [Source:MGI Symbol;Acc:MGI:99450]	-1.36294	560.544	1441.66	8.84977e-11	4.36977e-09	601.22	501.006	675.535	464.416	1136.31	1849.76	955.849	1824.71		Cmtm7	CKLF-like MARVEL transmembrane domain containing 7 [Source:MGI Symbol;Acc:MGI:2447166]	540.911	2116.19	-1.96714	7.8762e-55	5.30469e-53	593.418	489.52	567.664	513.042	2194.08	2414.77	1989.37	1866.55		Cplx2	complexin 2 [Source:MGI Symbol;Acc:MGI:104726]	757.063	271.052	1.48402	2.94961e-06	0.000133867	699.103	603.208	927.02	798.92	385.877	144.403	351.367	202.562		Arhgap30	Rho GTPase activating protein 30 [Source:MGI Symbol;Acc:MGI:2684948]
Cd302	CD302 antigen [Source:MGI Symbol;Acc:MGI:1913455]	-1.26716	396.358	954.196	1.01641e-10	4.98537e-09	399.058	326.788	536.423	323.161	692.364	1065.69	922.443	1136.29		Gsdmd	gasdermin D [Source:MGI Symbol;Acc:MGI:1916396]	1090.23	4840.95	-2.15134	9.6952e-55	6.51262e-53	952.298	979.949	1023.64	1405.03	4786.01	4710.67	4612.99	5254.12		Ighv1-59	immunoglobulin heavy variable V1-59 [Source:MGI Symbol;Acc:MGI:3644474]	15.0183	137.954	-3.20421	3.00175e-06	0.000135912	11.0698	20.6983	17.0672	11.238	178.361	250.42	7.98561	115.047		Optn	optineurin [Source:MGI Symbol;Acc:MGI:1918898]
Ptprm	protein tyrosine phosphatase, receptor type, M [Source:MGI Symbol;Acc:MGI:102694]	-1.7898	47.1698	163.341	1.03221e-10	5.05167e-09	38.9582	47.4203	47.4245	54.8763	125.811	184.034	120.693	222.823		Cyp4f18	cytochrome P450, family 4, subfamily f, polypeptide 18 [Source:MGI Symbol;Acc:MGI:1919304]	207.677	1378.62	-2.73363	1.64675e-54	1.10328e-52	166.782	224.742	166.146	273.039	1263.79	1372.48	1343.2	1535.01		Olfr56	olfactory receptor 56 [Source:MGI Symbol;Acc:MGI:1333785]	50.4051	156.039	-1.6359	3.08647e-06	0.00013942	63.8644	49.2817	47.6086	40.8655	193.796	204.723	70.2733	155.363		Txnrd2	thioredoxin reductase 2 [Source:MGI Symbol;Acc:MGI:1347023]
Rgs16	regulator of G-protein signaling 16 [Source:MGI Symbol;Acc:MGI:108407]	-1.9635	29.0501	113.664	1.04045e-10	5.08072e-09	25.2702	28.8646	30.5624	31.5031	88.9495	99.293	103.452	162.96		Wfdc17	WAP four-disulfide core domain 17 [Source:MGI Symbol;Acc:MGI:3649773]	59.7848	780.194	-3.7075	1.75394e-54	1.17202e-52	57.3314	52.7735	59.074	69.9602	968.904	658.173	517.365	976.333		Psme2b	protease (prosome, macropain) activator subunit 2B [Source:MGI Symbol;Acc:MGI:1341073]	698.184	2128.72	-1.60734	3.104e-06	0.000139884	712.727	757.953	698.858	623.199	1370.29	1474.19	4077.45	1592.96		Traf5	TNF receptor-associated factor 5 [Source:MGI Symbol;Acc:MGI:107548]
Tmprss3	transmembrane protease, serine 3 [Source:MGI Symbol;Acc:MGI:2155445]	1.82883	286.987	80.6465	1.06693e-10	5.19859e-09	232.696	408.227	168.62	338.404	97.7643	74.4697	91.5977	58.7544		Gm12185	predicted gene 12185 [Source:MGI Symbol;Acc:MGI:3652173]	74.6951	749.442	-3.32843	2.13318e-54	1.42171e-52	63.288	82.7998	89.534	63.1585	881.141	735.217	849.647	531.763		Col8a1	collagen, type VIII, alpha 1 [Source:MGI Symbol;Acc:MGI:88463]	123.931	32.269	1.91626	3.35182e-06	0.000150699	125.174	128.133	139.233	103.185	55.7379	18.2788	12.777	42.2823		4930426D05Rik	RIKEN cDNA 4930426D05 gene [Source:MGI Symbol;Acc:MGI:1921894]
Zmynd15	zinc finger, MYND-type containing 15 [Source:MGI Symbol;Acc:MGI:3603821]	-2.6167	23.7369	146.016	1.07518e-10	5.22726e-09	8.4234	34.0189	18.9698	33.5355	91.3535	148.083	120.693	223.932		Tnf	tumor necrosis factor [Source:MGI Symbol;Acc:MGI:104798]	55.4819	1185.01	-4.42629	2.69135e-54	1.78905e-52	20.8478	77.3404	48.9206	74.8186	1297.72	1228.3	1138.64	1075.37		Cox4i2	cytochrome c oxidase subunit 4I2 [Source:MGI Symbol;Acc:MGI:2135755]	14.0971	83.2116	-2.5508	3.55134e-06	0.000159297	10.2183	17.7414	16.1689	12.2596	24.0102	74.0293	170.892	63.9151		Zbtb18	zinc finger and BTB domain containing 18 [Source:MGI Symbol;Acc:MGI:1353609]
Nr1d1	nuclear receptor subfamily 1, group D, member 1 [Source:MGI Symbol;Acc:MGI:2444210]	-1.82234	103.63	366.56	1.15179e-10	5.58746e-09	118.98	82.4702	104.334	108.736	246.815	489.617	218.757	511.053		Slamf7	SLAM family member 7 [Source:MGI Symbol;Acc:MGI:1922595]	414.699	3943.92	-3.25095	3.38096e-54	2.24162e-52	278.467	455.854	360.905	563.569	5035.26	4119.63	3276.28	3344.51		Edaradd	EDAR (ectodysplasin-A receptor)-associated death domain [Source:MGI Symbol;Acc:MGI:1931001]	97.6155	29.7769	1.72289	3.67951e-06	0.000164662	74.0827	117.291	105.098	93.9906	44.5903	15.537	38.3309	20.6495		Acap1	ArfGAP with coiled-coil, ankyrin repeat and PH domains 1 [Source:MGI Symbol;Acc:MGI:2388270]
Mpl	myeloproliferative leukemia virus oncogene [Source:MGI Symbol;Acc:MGI:97076]	1.4459	464.632	169.977	1.18332e-10	5.72786e-09	434.858	501.006	424.712	497.952	233.192	170.339	181.04	95.3374		Parp10	poly (ADP-ribose) polymerase family, member 10 [Source:MGI Symbol;Acc:MGI:3712326]	1207.14	3799.01	-1.65473	3.46058e-54	2.28847e-52	1067.71	1121.89	1310.7	1328.27	3820.62	3855.48	3922.45	3597.47		Rnf217	ring finger protein 217 [Source:MGI Symbol;Acc:MGI:3610311]	61.8741	124.647	-1.01977	3.73804e-06	0.000166122	58.7553	58.1525	68.2689	62.3199	138.916	133.436	97.4244	128.814		B4galnt1	beta-1,4-N-acetyl-galactosaminyl transferase 1 [Source:MGI Symbol;Acc:MGI:1342057]
Tmem108	transmembrane protein 108 [Source:MGI Symbol;Acc:MGI:1932411]	2.43198	149.932	27.4524	1.22251e-10	5.90459e-09	116.875	206.175	92.7412	183.937	47.2795	26.5352	20.4748	15.52		Myoc	myocilin [Source:MGI Symbol;Acc:MGI:1202864]	3380.33	233.534	3.8566	3.66467e-54	2.41717e-52	3257.47	3635	3925.65	2703.19	334.67	291.665	186.165	121.638		Rasgrp1	RAS guanyl releasing protein 1 [Source:MGI Symbol;Acc:MGI:1314635]	510.813	231.196	1.14712	3.90003e-06	0.000172922	485.37	625.878	399.732	532.273	204.944	276.01	287.482	156.346		Thy1	thymus cell antigen 1, theta [Source:MGI Symbol;Acc:MGI:98747]
Cdkn1a	cyclin-dependent kinase inhibitor 1A (P21) [Source:MGI Symbol;Acc:MGI:104556]	-1.52667	417.095	1201.77	1.2296e-10	5.9259e-09	458.022	282.46	542.747	385.151	827.791	1523.63	881.493	1574.18		Ncf2	neutrophil cytosolic factor 2 [Source:MGI Symbol;Acc:MGI:97284]	1085.24	4058.69	-1.90378	4.31946e-54	2.84172e-52	875.608	1239.27	1069.79	1156.29	4322.62	4045.89	3869.41	3996.83		Myzap	myocardial zonula adherens protein [Source:MGI Symbol;Acc:MGI:2142908]	93.4739	40.265	1.2094	4.01991e-06	0.000177828	91.9648	89.6928	88.0309	104.207	34.3002	36.5577	35.1367	55.0654		Impdh2	inosine monophosphate dehydrogenase 2 [Source:MGI Symbol;Acc:MGI:109367]
Cx3cl1	chemokine (C-X3-C motif) ligand 1 [Source:MGI Symbol;Acc:MGI:1097153]	-1.68111	61.7611	198.135	1.25237e-10	6.02254e-09	68.4401	67.007	51.64	59.9575	149.05	250.8	145.479	247.212		Igkv16-104	immunoglobulin kappa variable 16-104 [Source:MGI Symbol;Acc:MGI:2685913]	1.10917	3668.88	-11.7035	4.4826e-54	2.94146e-52	0.744564	0	3.69212	0	2783.84	5483.31	3803.39	2604.99		Lhx1	LIM homeobox protein 1 [Source:MGI Symbol;Acc:MGI:99783]	35.9867	5.86126	2.51703	4.21929e-06	0.00018622	37.4671	42.3823	24.2534	39.8438	11.1476	6.39759	0	5.89986		Zfpm1	zinc finger protein, multitype 1 [Source:MGI Symbol;Acc:MGI:1095400]
Batf3	basic leucine zipper transcription factor, ATF-like 3 [Source:MGI Symbol;Acc:MGI:1925491]	-1.86266	53.2573	193.83	1.28292e-10	6.15258e-09	60.0167	43.2968	55.8555	53.8601	129.818	237.105	139.013	269.383		Serping1	serine (or cysteine) peptidase inhibitor, clade G, member 1 [Source:MGI Symbol;Acc:MGI:894696]	7517.58	21617.5	-1.52392	5.11358e-54	3.3469e-52	6925.94	7805.02	8268.51	7070.84	21143.9	21699.9	19938	23688.2		Stc1	stanniocalcin 1 [Source:MGI Symbol;Acc:MGI:109131]	2.99601	28.3154	-3.21676	4.28585e-06	0.000188724	3.4061	0	4.49137	4.08655	12.8626	35.6437	43.1223	21.6328		Tpi1	triosephosphate isomerase 1 [Source:MGI Symbol;Acc:MGI:98797]
Endou	endonuclease, polyU-specific [Source:MGI Symbol;Acc:MGI:97746]	1.94905	152.34	39.5978	1.28497e-10	6.15258e-09	140.039	164.94	100.118	204.262	37.6633	35.0949	29.0957	56.5373		Tgtp1	T cell specific GTPase 1 [Source:MGI Symbol;Acc:MGI:98734]	387.393	3450.42	-3.15505	6.10876e-54	3.98804e-52	359.625	302.993	575.048	311.906	3454.35	2889.14	4246.07	3212.1		Ms4a6d	membrane-spanning 4-domains, subfamily A, member 6D [Source:MGI Symbol;Acc:MGI:1916024]	220.857	490.639	-1.15391	4.38327e-06	0.000192135	222.248	265.136	218.281	177.765	431.325	652.555	329.007	549.67		Ticrr	TOPBP1-interacting checkpoint and replication regulator [Source:MGI Symbol;Acc:MGI:1924261]
Casp4	caspase 4, apoptosis-related cysteine peptidase [Source:MGI Symbol;Acc:MGI:107700]	-1.0028	577.616	1157.69	1.31618e-10	6.27483e-09	622.278	479.358	669.212	539.617	958.411	1269.41	1018.35	1384.61		Apbb1ip	amyloid beta (A4) precursor protein-binding, family B, member 1 interacting protein [Source:MGI Symbol;Acc:MGI:1861354]	601.004	3280.99	-2.44992	8.55372e-54	5.56996e-52	436.315	605.075	712.58	650.047	3624.03	3558.32	2895.29	3046.33		Pfn2	profilin 2 [Source:MGI Symbol;Acc:MGI:97550]	51.8247	15.6071	1.76449	4.47722e-06	0.000195807	43.4278	58.1525	48.5068	57.2117	18.0076	7.31154	22.3597	14.7496		Pou2f2	POU domain, class 2, transcription factor 2 [Source:MGI Symbol;Acc:MGI:101897]
Nat8l	N-acetyltransferase 8-like [Source:MGI Symbol;Acc:MGI:2447776]	1.00376	893.901	445.291	1.33202e-10	6.3367e-09	826.546	892.74	787.246	1069.07	545.717	411.723	461.221	362.504		Selplg	selectin, platelet (p-selectin) ligand [Source:MGI Symbol;Acc:MGI:106689]	1087.18	5319.09	-2.29101	9.82628e-54	6.38233e-52	908.368	1035.45	1308.86	1096.04	5995.97	6001.7	4882.5	4396.19		Tchh	trichohyalin [Source:MGI Symbol;Acc:MGI:2177944]	13.7076	41.9725	-1.60782	4.55239e-06	0.000198643	13.6244	13.7989	16.1689	11.238	41.1603	46.611	44.7194	35.3992		Cd3e	CD3 antigen, epsilon polypeptide [Source:MGI Symbol;Acc:MGI:88332]
Rnf217	ring finger protein 217 [Source:MGI Symbol;Acc:MGI:3610311]	-1.08964	163.535	348.317	1.37196e-10	6.49873e-09	167.415	179.373	154.92	152.434	283.677	389.468	324.364	395.761		Mvp	major vault protein [Source:MGI Symbol;Acc:MGI:1925638]	2079.17	6262.15	-1.5903	1.14605e-53	7.42488e-52	2269.43	1946.25	2110.05	1990.95	6899.34	6564.12	5801.41	5783.73		Fsd1l	fibronectin type III and SPRY domain containing 1-like [Source:MGI Symbol;Acc:MGI:2442443]	127.459	55.267	1.19165	4.79783e-06	0.000208408	104.738	122.219	134.741	148.137	74.603	45.6971	44.7194	56.0487		Shank3	SH3 and multiple ankyrin repeat domains 3 [Source:MGI Symbol;Acc:MGI:1930016]
Retnla	resistin like alpha [Source:MGI Symbol;Acc:MGI:1888504]	-2.47428	62.278	346.143	1.47965e-10	6.94933e-09	96.869	47.4203	61.1249	43.6978	136.229	451.098	225.223	572.024		Mcemp1	mast cell expressed membrane protein 1 [Source:MGI Symbol;Acc:MGI:1916439]	186.743	981.787	-2.39636	1.16751e-53	7.54475e-52	160.826	211.094	184.606	190.447	950.181	876.096	922.165	1178.7		Gm34425	predicted gene, 34425 [Source:MGI Symbol;Acc:MGI:5593584]	0	11.7587	-6.06277	4.83719e-06	0.000209173	0	0	0	0	6.00254	8.22548	23.9568	8.84979		Ppp1r18	protein phosphatase 1, regulatory subunit 18 [Source:MGI Symbol;Acc:MGI:1923698]
Gm49085	predicted gene, 49085 [Source:MGI Symbol;Acc:MGI:6118472]	3.89134	73.4755	4.77928	1.51293e-10	7.09059e-09	35.7994	107.211	42.1551	108.736	8.81481	5.99182	4.31048	0		Cd28	CD28 antigen [Source:MGI Symbol;Acc:MGI:88327]	55.3653	882.56	-3.99866	1.23183e-53	7.9403e-52	50.6304	29.1164	58.151	83.5636	1057.84	982.857	742.494	747.051		H2-M3	histocompatibility 2, M region locus 3 [Source:MGI Symbol;Acc:MGI:95915]	508.033	1193.25	-1.23024	5.0744e-06	0.000217961	513.47	569.697	447.341	501.624	790.62	1000.77	1873.42	1108.19		Eef2k	eukaryotic elongation factor-2 kinase [Source:MGI Symbol;Acc:MGI:1195261]
Plekhg4	pleckstrin homology domain containing, family G (with RhoGef domain) member 4 [Source:MGI Symbol;Acc:MGI:2142544]	-2.92687	7.77214	59.2575	1.65095e-10	7.70477e-09	3.15877	13.4014	8.43102	6.09737	49.6835	58.2062	58.1915	70.9487		Cd209a	CD209a antigen [Source:MGI Symbol;Acc:MGI:2157942]	627.745	2.74154	7.82745	2.12288e-53	1.36495e-51	533.108	523.185	827.959	626.727	1.17017	3.30187	6.49412	0		Gm18724	predicted gene, 18724 [Source:MGI Symbol;Acc:MGI:5010909]	24.8768	3.22017	2.91195	5.0998e-06	0.000218564	19.5851	35.4829	26.05	18.3895	2.57252	1.82788	1.59712	6.88317		Chaf1b	chromatin assembly factor 1, subunit B (p60) [Source:MGI Symbol;Acc:MGI:1314881]
Abcb1a	ATP-binding cassette, sub-family B (MDR/TAP), member 1A [Source:MGI Symbol;Acc:MGI:97570]	-1.46619	94.3214	260.74	1.6695e-10	7.77496e-09	96.869	104.119	99.0644	77.2334	191.522	313.286	214.446	323.704		Rassf5	Ras association (RalGDS/AF-6) domain family member 5 [Source:MGI Symbol;Acc:MGI:1926375]	577.005	2116.09	-1.87515	2.44799e-53	1.57003e-51	563.635	486.79	622.123	635.472	2209.29	2256.28	1936.33	2062.46		Xlr3b	X-linked lymphocyte-regulated 3B [Source:MGI Symbol;Acc:MGI:109505]	10.8443	68.7565	-2.66611	5.22508e-06	0.000223084	0.851526	15.7702	13.4741	13.2813	50.5928	51.1807	118.187	55.0654		Mis18bp1	MIS18 binding protein 1 [Source:MGI Symbol;Acc:MGI:2145099]
Klre1	killer cell lectin-like receptor family E member 1 [Source:MGI Symbol;Acc:MGI:2662547]	1.78433	156.114	45.1831	1.72139e-10	7.99976e-09	225.326	117.52	145.435	136.175	52.8889	42.7987	49.5705	35.4744		Pira1	paired-Ig-like receptor A1 [Source:MGI Symbol;Acc:MGI:1195971]	7.41231	342.324	-5.5492	3.56957e-53	2.28363e-51	3.72282	14.5582	5.53819	5.83002	388.498	333.489	264.094	383.214		Trim2	tripartite motif-containing 2 [Source:MGI Symbol;Acc:MGI:1933163]	420.522	198.804	1.08003	5.70528e-06	0.000242355	461.527	337.087	425.782	457.693	272.687	142.575	198.043	181.912		Chd3	chromodomain helicase DNA binding protein 3 [Source:MGI Symbol;Acc:MGI:1344395]
Fkbp5	FK506 binding protein 5 [Source:MGI Symbol;Acc:MGI:104670]	-1.08369	2032.35	4307.78	1.7796e-10	8.25296e-09	1952.12	1833.93	2559.87	1783.48	3238.24	4855.94	3702.7	5434.23		Rassf4	Ras association (RalGDS/AF-6) domain family member 4 [Source:MGI Symbol;Acc:MGI:2386853]	1317.85	6731.97	-2.35308	4.11807e-53	2.62794e-51	1116.85	1350.27	1547.92	1256.37	8246.21	7237.7	5968.1	5475.86		Il27	interleukin 27 [Source:MGI Symbol;Acc:MGI:2384409]	29.8585	119.146	-1.98858	5.72445e-06	0.000242634	36.6156	49.2817	16.1689	17.3678	86.6081	106.017	196.446	87.5146		Cyb561a3	cytochrome b561 family, member A3 [Source:MGI Symbol;Acc:MGI:2686925]
A530040E14Rik	RIKEN cDNA A530040E14 gene [Source:MGI Symbol;Acc:MGI:3612703]	-1.18148	274.01	621.991	1.8006e-10	8.33284e-09	207.426	271.121	302.463	315.031	480.007	668.516	568.983	770.459		Klrk1	killer cell lectin-like receptor subfamily K, member 1 [Source:MGI Symbol;Acc:MGI:1196250]	176.582	944.832	-2.4222	4.27287e-53	2.71993e-51	140.723	203.815	196.606	165.184	961.883	997.165	988.189	832.09		H2-Ab1	histocompatibility 2, class II antigen A, beta 1 [Source:MGI Symbol;Acc:MGI:103070]	6793.73	13760.8	-1.01825	5.84454e-06	0.000247179	7140.04	8437.03	5488.46	6109.39	9269.64	15718.9	15246.1	14808.6		Atg16l2	autophagy related 16-like 2 (S. cerevisiae) [Source:MGI Symbol;Acc:MGI:1920933]
Mlkl	mixed lineage kinase domain-like [Source:MGI Symbol;Acc:MGI:1921818]	-1.11643	672.463	1457.67	1.86505e-10	8.61313e-09	551.732	604.094	982.213	551.812	1506.53	1485.11	1428.92	1410.11		Pik3c2b	phosphatidylinositol-4-phosphate 3-kinase catalytic subunit type 2 beta [Source:MGI Symbol;Acc:MGI:2685045]	1316.59	342.836	1.941	4.55395e-53	2.89164e-51	1372.23	1141	1393.78	1359.37	318.287	374.212	322.541	356.302		Mrgpre	MAS-related GPR, member E [Source:MGI Symbol;Acc:MGI:2441884]	50.5802	16.4723	1.64466	5.86522e-06	0.00024751	40.0217	63.0806	51.2017	48.0169	18.8651	11.8812	22.3597	12.783		Pla2g4c	phospholipase A2, group IVC (cytosolic, calcium-independent) [Source:MGI Symbol;Acc:MGI:1196403]
Slc7a2	solute carrier family 7 (cationic amino acid transporter, y+ system), member 2 [Source:MGI Symbol;Acc:MGI:99828]	-1.71047	118.597	388.146	1.90275e-10	8.76892e-09	129.51	135.045	127.519	82.3145	245.212	530.704	285.569	491.098		Pnp	purine-nucleoside phosphorylase [Source:MGI Symbol;Acc:MGI:97365]	802.545	3509.21	-2.12821	5.24748e-53	3.32375e-51	877.097	612.354	850.112	870.616	3874.44	3584.73	3458.12	3119.53		Cish	cytokine inducible SH2-containing protein [Source:MGI Symbol;Acc:MGI:103159]	146.63	476.231	-1.70045	5.89828e-06	0.00024836	162.641	159.673	129.352	134.856	228.954	865.503	317.827	492.638		Slc7a5	solute carrier family 7 (cationic amino acid transporter, y+ system), member 5 [Source:MGI Symbol;Acc:MGI:1298205]
Prg4	proteoglycan 4 (megakaryocyte stimulating factor, articular superficial zone protein) [Source:MGI Symbol;Acc:MGI:1891344]	-1.97704	61.6917	242.929	1.92751e-10	8.86453e-09	68.4401	65.9761	72.7175	39.6329	135.428	321.846	190.739	323.704		Dhx58	DEXH (Asp-Glu-X-His) box polypeptide 58 [Source:MGI Symbol;Acc:MGI:1931560]	386.944	2244.83	-2.53584	6.73932e-53	4.25812e-51	428.869	277.516	462.439	378.951	2148.44	2474.2	2420.14	1936.52		Ren1	renin 1 structural [Source:MGI Symbol;Acc:MGI:97898]	15.6494	0.245827	5.6118	6.17358e-06	0.000259385	15.3275	7.88508	10.7793	28.6058	0	0	0	0.98331		Gbp2b	guanylate binding protein 2b [Source:MGI Symbol;Acc:MGI:95666]
Egfl6	EGF-like-domain, multiple 6 [Source:MGI Symbol;Acc:MGI:1858599]	2.89239	92.1973	12.2689	2.04504e-10	9.38556e-09	106.345	94.8407	54.8016	112.801	12.8215	19.6874	2.15524	14.4115		Sbno2	strawberry notch 2 [Source:MGI Symbol;Acc:MGI:2448490]	2734.41	7920.71	-1.53461	1.27781e-52	8.05369e-51	2574.7	2786.08	2536.49	3040.35	7913.88	8167.73	7158.68	8442.54		Pim1	proviral integration site 1 [Source:MGI Symbol;Acc:MGI:97584]	3450.6	8261.21	-1.25934	7.05765e-06	0.00029524	3263.9	3431.98	3570.64	3535.89	4266.09	9731.65	11601.5	7445.62		Gprasp1	G protein-coupled receptor associated sorting protein 1 [Source:MGI Symbol;Acc:MGI:1917418]
Tapbpl	TAP binding protein-like [Source:MGI Symbol;Acc:MGI:2384853]	-1.11686	819.705	1777.47	2.14198e-10	9.78983e-09	706.512	661.823	1194.04	716.441	1702.86	1965.32	1635.83	1805.87		Pcdh12	protocadherin 12 [Source:MGI Symbol;Acc:MGI:1855700]	740.907	116.357	2.67015	1.39161e-52	8.74933e-51	679.043	673.317	862.111	749.157	106.486	137.578	126.635	94.7269		Pak6	p21 (RAC1) activated kinase 6 [Source:MGI Symbol;Acc:MGI:2679420]	19.5345	60.9166	-1.6616	7.16187e-06	0.00029895	12.7729	23.6552	16.1689	25.5409	64.3129	80.4269	39.928	58.9986		Dlgap5	DLG associated protein 5 [Source:MGI Symbol;Acc:MGI:2183453]
Btnl7-ps	butyrophilin-like 7, pseudogene [Source:MGI Symbol;Acc:MGI:2388054]	-2.13947	29.3777	129.563	2.2648e-10	1.03298e-08	16.8468	27.8337	47.4245	25.4057	119.401	100.149	175.652	123.052		Arrb2	arrestin, beta 2 [Source:MGI Symbol;Acc:MGI:99474]	1342.88	5471.68	-2.02737	1.8971e-52	1.18982e-50	1046.11	1443.99	1319.93	1561.47	5572.37	5892.74	5032.94	5388.67		Uchl1	ubiquitin carboxy-terminal hydrolase L1 [Source:MGI Symbol;Acc:MGI:103149]	265.586	50.8189	2.41194	7.2979e-06	0.000303968	248.646	311.461	285.651	216.587	19.7226	16.451	127.77	39.3324		Kif18b	kinesin family member 18B [Source:MGI Symbol;Acc:MGI:2446979]
Lmtk3	lemur tyrosine kinase 3 [Source:MGI Symbol;Acc:MGI:3039582]	-3.01476	7.27348	58.6612	2.27181e-10	1.03405e-08	5.26462	8.24702	9.48489	6.09737	53.6902	82.1735	34.4838	64.2973		Dock2	dedicator of cyto-kinesis 2 [Source:MGI Symbol;Acc:MGI:2149010]	1347.04	7115.95	-2.40174	1.90851e-52	1.19404e-50	1028.24	1311.15	1647.61	1401.15	7586.24	8358.14	6384.8	6134.65		Psmb8	proteasome (prosome, macropain) subunit, beta type 8 (large multifunctional peptidase 7) [Source:MGI Symbol;Acc:MGI:1346527]	2625.66	6988.75	-1.41208	7.40904e-06	0.000306607	2382.57	3042.65	2589.73	2487.69	4147.75	5389.52	12281.9	6135.85		Abca13	ATP-binding cassette, sub-family A (ABC1), member 13 [Source:MGI Symbol;Acc:MGI:2388707]
1810053B23Rik	RIKEN cDNA 1810053B23 gene [Source:MGI Symbol;Acc:MGI:1917107]	3.22333	48.2525	5.15636	2.33087e-10	1.05658e-08	41.0641	55.6674	49.5322	46.7465	8.01347	1.71195	6.46572	4.4343		Il18r1	interleukin 18 receptor 1 [Source:MGI Symbol;Acc:MGI:105383]	120.649	1316.67	-3.45331	2.09375e-52	1.30672e-50	67.7553	131.024	127.378	156.439	1280.17	1375.78	1053.13	1557.61		Col1a2	collagen, type I, alpha 2 [Source:MGI Symbol;Acc:MGI:88468]	1025.17	464.204	1.13934	7.77556e-06	0.000321084	988.621	1118.7	1010.56	982.815	672.284	445.09	276.302	463.139		Trim34a	tripartite motif-containing 34A [Source:MGI Symbol;Acc:MGI:2137359]
Zbp1	Z-DNA binding protein 1 [Source:MGI Symbol;Acc:MGI:1927449]	-2.29489	782.512	3839.85	2.42048e-10	1.09272e-08	603.326	560.797	1323.67	642.256	2936.94	4654.79	2860	4907.66		Laptm5	lysosomal-associated protein transmembrane 5 [Source:MGI Symbol;Acc:MGI:108046]	4368.27	20585.2	-2.23657	2.74073e-52	1.70634e-50	3641.66	4348.35	5373.89	4109.19	22773.9	23360.7	19342.7	16863.5		Id3	inhibitor of DNA binding 3 [Source:MGI Symbol;Acc:MGI:96398]	454.708	168.227	1.44351	7.93462e-06	0.00032695	396.811	604.194	397.936	419.893	126.911	96.8778	273.108	176.012		Ffar1	free fatty acid receptor 1 [Source:MGI Symbol;Acc:MGI:2684079]
Gm30948	predicted gene, 30948 [Source:MGI Symbol;Acc:MGI:5590107]	2.54877	97.2384	16.4561	2.68355e-10	1.20656e-08	124.245	116.489	52.6938	95.5255	19.2323	20.5434	19.3972	6.65144		Jup	junction plakoglobin [Source:MGI Symbol;Acc:MGI:96650]	3539.82	1268.1	1.48092	2.86792e-52	1.77709e-50	3509.88	3231.92	3950.57	3466.92	1228.68	1282.23	1296.66	1264.82		Strc	stereocilin [Source:MGI Symbol;Acc:MGI:2153816]	0.717386	18.3783	-4.71153	8.4905e-06	0.000349108	0	1.97127	0.898275	0	28.2977	8.22548	14.3741	22.6161		Cd8b1	CD8 antigen, beta chain 1 [Source:MGI Symbol;Acc:MGI:88347]
Myh4	myosin, heavy polypeptide 4, skeletal muscle [Source:MGI Symbol;Acc:MGI:1339713]	-5.51151	216.711	9885.32	2.77395e-10	1.24467e-08	416.958	84.5319	270.846	94.5092	2183.67	16266.1	2862.16	18229.4		Myo1g	myosin IG [Source:MGI Symbol;Acc:MGI:1927091]	1098.4	5748.24	-2.38852	2.86829e-52	1.77709e-50	800.407	1239.27	1004.26	1349.65	5550.13	6188.81	5290.54	5963.49		Endou	endonuclease, polyU-specific [Source:MGI Symbol;Acc:MGI:97746]	107.909	45.8929	1.21467	9.07301e-06	0.000371472	85.1526	115.319	109.59	121.575	41.1603	60.3202	31.9424	50.1488		Gmnn	geminin [Source:MGI Symbol;Acc:MGI:1927344]
Gm50237	predicted gene, 50237 [Source:MGI Symbol;Acc:MGI:6303043]	-4.46884	1.7988	40.1507	2.79756e-10	1.25273e-08	0	3.09263	1.05388	3.04869	39.266	40.2308	32.3286	48.7773		Gsr	glutathione reductase [Source:MGI Symbol;Acc:MGI:95804]	1228.01	4429.03	-1.8507	4.62864e-52	2.86079e-50	1163.75	1361.19	1259.94	1127.14	5011.85	4212.09	3769.84	4722.35		Cd300lb	CD300 molecule like family member B [Source:MGI Symbol;Acc:MGI:2685099]	1699.34	714.879	1.24691	9.10145e-06	0.000371846	1521.68	1902.28	1607.01	1766.41	1046.16	666.264	380.115	766.982		Slc26a1	solute carrier family 26 (sulfate transporter), member 1 [Source:MGI Symbol;Acc:MGI:2385894]
Phf11d	PHD finger protein 11D [Source:MGI Symbol;Acc:MGI:1277133]	-1.84014	112.11	401.559	2.97579e-10	1.32184e-08	95.8161	118.551	123.304	110.769	241.205	542.687	239.232	583.11		Blvrb	biliverdin reductase B (flavin reductase (NADPH)) [Source:MGI Symbol;Acc:MGI:2385271]	717.238	3238.92	-2.17531	4.90675e-52	3.02536e-50	644.793	719.721	787.346	717.092	4089.76	3110.36	2726.45	3029.11		Gm11837	predicted gene 11837 [Source:MGI Symbol;Acc:MGI:3702175]	50.8768	15.4853	1.67382	9.39342e-06	0.000382151	49.3885	51.253	39.5241	63.3415	20.5801	13.7091	7.98561	19.6662		Zfp275	zinc finger protein 275 [Source:MGI Symbol;Acc:MGI:1350985]
Upb1	ureidopropionase, beta [Source:MGI Symbol;Acc:MGI:2143535]	1.37418	198.725	76.4099	2.98243e-10	1.32213e-08	196.897	193.805	163.351	240.846	82.5387	87.3093	58.1915	77.6002		Gfi1	growth factor independent 1 transcription repressor [Source:MGI Symbol;Acc:MGI:103170]	52.424	441.628	-3.06784	1.11943e-51	6.88542e-50	63.288	48.224	54.4588	43.7251	442.326	502.985	371.247	449.953		Reln	reelin [Source:MGI Symbol;Acc:MGI:103022]	506.465	229.329	1.1369	9.53444e-06	0.00038707	553.492	572.654	456.324	443.39	333.57	236.711	153.324	193.712		Rad51ap1	RAD51 associated protein 1 [Source:MGI Symbol;Acc:MGI:1098224]
Gm35853	predicted gene, 35853 [Source:MGI Symbol;Acc:MGI:5595012]	1.18708	486.587	214.248	3.01617e-10	1.33441e-08	532.78	537.087	383.611	492.871	198.734	161.779	275.871	220.606		Rhog	ras homolog family member G [Source:MGI Symbol;Acc:MGI:1928370]	1117.69	5278.42	-2.24011	1.12667e-51	6.91334e-50	886.031	1090.96	1374.39	1119.36	6074.37	5542.74	4762.35	4734.19		Rrm2b	ribonucleotide reductase M2 B (TP53 inducible) [Source:MGI Symbol;Acc:MGI:2155865]	482.972	220.179	1.12715	9.57438e-06	0.000387873	344.016	579.553	520.999	487.321	293.267	234.883	154.921	197.645		Cd177	CD177 antigen [Source:MGI Symbol;Acc:MGI:1916141]
Ighv1-11	immunoglobulin heavy variable V1-11 [Source:MGI Symbol;Acc:MGI:5009835]	-3.92724	3.8826	59.2198	3.0475e-10	1.34558e-08	4.2117	7.21614	1.05388	3.04869	31.2525	81.3175	33.4062	90.9031		Was	Wiskott-Aldrich syndrome [Source:MGI Symbol;Acc:MGI:105059]	497.083	2709.64	-2.44719	1.15222e-51	7.05314e-50	401.32	557.761	622.123	407.13	2862.24	2970.58	2415.81	2589.92		ENSMUSG00000120714	novel transcript	20.1548	1.18034	3.99639	1.06177e-05	0.000424776	8.51526	32.5259	24.2534	15.3246	0.857506	0.913942	0	2.94993		Prkce	protein kinase C, epsilon [Source:MGI Symbol;Acc:MGI:97599]
Bmf	BCL2 modifying factor [Source:MGI Symbol;Acc:MGI:2176433]	1.0098	781.413	387.776	3.0864e-10	1.36004e-08	780.217	829.856	636.542	879.038	342.976	494.753	366.391	346.984		Pitpnm2	phosphatidylinositol transfer protein, membrane-associated 2 [Source:MGI Symbol;Acc:MGI:1336192]	4424.18	1752.83	1.33566	1.47102e-51	8.98305e-50	4692.24	4352.9	4225.64	4425.96	1625.37	1734.58	1789.13	1862.25		Fbxo32	F-box protein 32 [Source:MGI Symbol;Acc:MGI:1914981]	108.031	43.9209	1.28739	1.08399e-05	0.000431868	118.362	133.061	105.098	75.6011	55.7379	35.6437	35.1367	49.1655		Ak2	adenylate kinase 2 [Source:MGI Symbol;Acc:MGI:87978]
Shtn1	shootin 1 [Source:MGI Symbol;Acc:MGI:1918903]	-2.44247	206.709	1123.58	3.21228e-10	1.4127e-08	152.674	176.28	339.348	158.532	716.404	1438.04	821.147	1518.75		Gm10134	predicted gene 10134 [Source:MGI Symbol;Acc:MGI:3642322]	231.087	1077.46	-2.22209	1.69965e-51	1.03545e-49	209.223	214.733	276.909	223.484	1202.94	1141.35	983.859	981.716		Adh1	alcohol dehydrogenase 1 (class I) [Source:MGI Symbol;Acc:MGI:87921]	81.6943	19.5192	2.0343	1.12303e-05	0.000446498	126.026	63.0806	53.8965	83.7742	26.5827	14.6231	6.38849	30.4826		Ikbke	inhibitor of kappaB kinase epsilon [Source:MGI Symbol;Acc:MGI:1929612]
Slco2a1	solute carrier organic anion transporter family, member 2a1 [Source:MGI Symbol;Acc:MGI:1346021]	-1.89814	61.8788	230.754	3.28089e-10	1.44001e-08	58.9638	59.7909	76.933	51.8276	137.03	299.591	163.798	322.595		Parp9	poly (ADP-ribose) polymerase family, member 9 [Source:MGI Symbol;Acc:MGI:1933117]	1127.41	4532.36	-2.00749	2.38337e-51	1.44852e-49	1065.47	970.85	1246.09	1227.22	5117.17	4568.69	4724.47	3719.11		AF067061	cDNA sequence AF067061 [Source:MGI Symbol;Acc:MGI:2681166]	10.3984	0	5.74374	1.15246e-05	0.000455374	11.9214	9.85635	4.49137	15.3246	0	0	0	0		Lgals3bp	lectin, galactoside-binding, soluble, 3 binding protein [Source:MGI Symbol;Acc:MGI:99554]
Trib2	tribbles pseudokinase 2 [Source:MGI Symbol;Acc:MGI:2145021]	1.06783	706.76	337.319	3.30891e-10	1.44944e-08	848.657	728.83	529.046	720.506	288.485	376.629	302.811	381.349		Mertk	MER proto-oncogene tyrosine kinase [Source:MGI Symbol;Acc:MGI:96965]	1080.12	4626.02	-2.09876	2.92401e-51	1.77288e-49	1037.18	964.481	1172.25	1146.57	5094.94	4085.52	3849.93	5473.71		Lag3	lymphocyte-activation gene 3 [Source:MGI Symbol;Acc:MGI:106588]	223.747	474.212	-1.08058	1.16166e-05	0.000457132	217.991	293.719	192.231	191.046	367.012	469.766	650.028	410.04		Tespa1	thymocyte expressed, positive selection associated 1 [Source:MGI Symbol;Acc:MGI:1914846]
Snx24	sorting nexing 24 [Source:MGI Symbol;Acc:MGI:1916476]	-2.56767	37.0199	219.491	3.44725e-10	1.50408e-08	44.2228	24.741	52.6938	26.4219	102.572	283.327	120.693	371.372		Arg1	arginase, liver [Source:MGI Symbol;Acc:MGI:88070]	56.218	1024.89	-4.18683	4.17706e-51	2.52663e-49	54.3532	67.3317	70.1504	33.0368	1496.65	860.688	1085.6	656.63		Ly6i	lymphocyte antigen 6 complex, locus I [Source:MGI Symbol;Acc:MGI:1888480]	71.7248	243.944	-1.76246	1.2915e-05	0.000504103	99.6285	70.9657	45.812	70.493	89.1806	298.859	336.993	250.744		Stx2	syntaxin 2 [Source:MGI Symbol;Acc:MGI:108059]
Reg3g	regenerating islet-derived 3 gamma [Source:MGI Symbol;Acc:MGI:109406]	-7.4757	0	34.0952	4.02161e-10	1.74094e-08	0	0	0	0	16.8283	35.9509	22.63	60.9716		Resf1	retroelement silencing factor 1 [Source:MGI Symbol;Acc:MGI:1914496]	979.079	2867.48	-1.55014	5.76339e-51	3.47793e-49	967.189	1117.34	918.416	913.37	2983.94	2864.92	2732.94	2888.1		Arc	activity regulated cytoskeletal-associated protein [Source:MGI Symbol;Acc:MGI:88067]	32.8406	5.06989	2.6128	1.32048e-05	0.000514371	36.6156	43.3679	35.0327	16.3462	6.86004	4.56971	0	8.84979		Xpnpep1	X-prolyl aminopeptidase (aminopeptidase P) 1, soluble [Source:MGI Symbol;Acc:MGI:2180003]
Gm16793	predicted gene, 16793 [Source:MGI Symbol;Acc:MGI:4439717]	1.41917	314.282	117.264	4.06043e-10	1.75431e-08	301.136	335.035	314.055	306.901	149.852	98.437	148.712	72.0573		Csf2ra	colony stimulating factor 2 receptor, alpha, low-affinity (granulocyte-macrophage) [Source:MGI Symbol;Acc:MGI:1339754]	1789.42	7766.09	-2.11814	6.10841e-51	3.67744e-49	1428.07	2051.8	1621.77	2056.05	7273.8	8003.74	7041.79	8745.02		Mexis	macrophage expressed LXRa(NR1H3)-dependent amplifier of Abca1 transcription lncRNA [Source:MGI Symbol;Acc:MGI:2140270]	63.7646	151.522	-1.25202	1.33235e-05	0.00051795	68.9736	55.1955	51.2017	79.6877	109.761	212.948	130.964	152.413		Ly9	lymphocyte antigen 9 [Source:MGI Symbol;Acc:MGI:96885]
Igkv1-135	immunoglobulin kappa variable 1-135 [Source:MGI Symbol;Acc:MGI:3819952]	-1.42598	294.653	791.498	4.34727e-10	1.87458e-08	279.025	275.244	323.54	300.804	1046.56	582.918	1040.98	495.533		Il15ra	interleukin 15 receptor, alpha chain [Source:MGI Symbol;Acc:MGI:104644]	354.782	1596.22	-2.16911	7.7985e-51	4.68387e-49	382.706	337.568	346.137	352.716	1472.08	1447.32	1457.93	2007.57		Gm9574	predicted gene 9574 [Source:MGI Symbol;Acc:MGI:3809525]	11.7284	50.134	-2.09276	1.35865e-05	0.000526046	17.0305	10.842	2.69482	16.3462	37.7302	45.6971	59.0935	58.0153		Ssh2	slingshot protein phosphatase 2 [Source:MGI Symbol;Acc:MGI:2679255]
Igkv6-15	immunoglobulin kappa variable 6-15 [Source:MGI Symbol;Acc:MGI:1330831]	-1.19226	336.941	770.103	4.37168e-10	1.88144e-08	306.401	338.128	398.366	304.869	869.461	533.272	989.255	688.424		Lyn	LYN proto-oncogene, Src family tyrosine kinase [Source:MGI Symbol;Acc:MGI:96892]	1480.12	6485.21	-2.13166	8.16625e-51	4.89323e-49	1313.41	1348.45	1758.37	1500.26	7496.13	7055	6088.24	5301.48		Myl4	myosin, light polypeptide 4 [Source:MGI Symbol;Acc:MGI:97267]	734.795	182.772	2.01625	1.3734e-05	0.000530688	711.024	692.901	790.482	744.773	94.3256	88.6524	436.014	112.097		Cdc42ep4	CDC42 effector protein (Rho GTPase binding) 4 [Source:MGI Symbol;Acc:MGI:1929760]
Cxcl11	chemokine (C-X-C motif) ligand 11 [Source:MGI Symbol;Acc:MGI:1860203]	-6.92741	0.526938	63.2804	4.82165e-10	2.07106e-08	0	0	2.10775	0	52.8889	69.3339	35.5615	95.3374		Tril	TLR4 interactor with leucine-rich repeats [Source:MGI Symbol;Acc:MGI:1914123]	758.838	146.024	2.37599	8.63376e-51	5.16125e-49	742.331	741.558	816.883	734.582	114.677	157.389	172.094	139.938		Gzmk	granzyme K [Source:MGI Symbol;Acc:MGI:1298232]	6.0972	36.0716	-2.57946	1.37974e-05	0.000532072	7.66373	10.842	1.79655	4.08655	38.5877	56.6644	17.5683	31.4659		Metap2	methionine aminopeptidase 2 [Source:MGI Symbol;Acc:MGI:1929701]
Tspan3	tetraspanin 3 [Source:MGI Symbol;Acc:MGI:1928098]	-1.36597	575.638	1483.6	4.91644e-10	2.10769e-08	645.443	429.876	786.192	441.043	1214.04	1761.59	1081.93	1876.82		Stxbp2	syntaxin binding protein 2 [Source:MGI Symbol;Acc:MGI:107370]	1333.81	3905.61	-1.54964	1.09932e-50	6.55637e-49	1407.97	1477.66	1161.17	1288.43	3950.51	4017.28	3757.93	3896.72		ENSMUSG00000120413	novel transcript	33.3091	8.08687	2.0794	1.48237e-05	0.000565978	34.061	35.4829	19.762	43.9304	5.14503	9.13942	11.1798	6.88317		Apol8	apolipoprotein L 8 [Source:MGI Symbol;Acc:MGI:2444921]
Rtp4	receptor transporter protein 4 [Source:MGI Symbol;Acc:MGI:1915025]	-1.26939	743.84	1793.17	5.24222e-10	2.23006e-08	712.83	637.082	1009.61	615.834	1333.44	2154.49	1394.44	2290.31		Arhgap29	Rho GTPase activating protein 29 [Source:MGI Symbol;Acc:MGI:2443818]	5313.63	1889.9	1.49146	1.19411e-50	7.1051e-49	5248.43	4967.99	5698.79	5339.33	2044.29	1674.05	1865.98	1975.27		Radx	RPA1 related single stranded DNA binding protein, X-linked [Source:MGI Symbol;Acc:MGI:2147848]	20.2826	60.1383	-1.56521	1.48673e-05	0.000566516	27.2488	22.6696	10.7793	20.4327	50.5928	74.9432	63.8849	51.1321		Uhrf1	ubiquitin-like, containing PHD and RING finger domains, 1 [Source:MGI Symbol;Acc:MGI:1338889]
Dock4	dedicator of cytokinesis 4 [Source:MGI Symbol;Acc:MGI:1918006]	-1.31165	175.289	434.944	5.31478e-10	2.25659e-08	204.267	165.971	188.644	142.272	355.798	560.663	321.131	502.184		Pomp	proteasome maturation protein [Source:MGI Symbol;Acc:MGI:1913787]	1234.52	3189.61	-1.36952	1.2837e-50	7.62041e-49	1212.9	1228.35	1205.48	1291.35	3481.27	3093.85	2997.04	3186.27		Nuggc	nuclear GTPase, germinal center associated [Source:MGI Symbol;Acc:MGI:2685446]	6.50151	27.5995	-2.09409	1.58033e-05	0.000596281	6.81221	6.89944	7.1862	5.10819	22.2951	37.4716	19.1655	31.4659		Polr3h	polymerase (RNA) III (DNA directed) polypeptide H [Source:MGI Symbol;Acc:MGI:1926179]
Limch1	LIM and calponin homology domains 1 [Source:MGI Symbol;Acc:MGI:1924819]	-1.31822	149.845	373.826	5.37821e-10	2.27859e-08	178.997	167.002	123.304	130.077	299.704	423.707	297.423	474.47		Ikzf1	IKAROS family zinc finger 1 [Source:MGI Symbol;Acc:MGI:1342540]	1123.38	5374.59	-2.25896	1.40933e-50	8.34674e-49	853.271	1087.32	1339.32	1213.62	5842.68	5999.5	4821.88	4834.3		Igkv17-127	immunoglobulin kappa variable 17-127 [Source:MGI Symbol;Acc:MGI:3646891]	68.0369	405.975	-2.57875	1.74896e-05	0.000654771	42.5763	32.5259	105.098	91.9473	417.605	634.276	47.9136	524.104		Spire1	spire type actin nucleation factor 1 [Source:MGI Symbol;Acc:MGI:1915416]
Cd5	CD5 antigen [Source:MGI Symbol;Acc:MGI:88340]	-1.46768	117.597	325.557	5.3872e-10	2.27859e-08	149.515	77.3158	132.789	110.769	255.63	299.591	314.665	432.344		Gna13	guanine nucleotide binding protein, alpha 13 [Source:MGI Symbol;Acc:MGI:95768]	1893.63	5529.66	-1.54584	1.49342e-50	8.82433e-49	1960.44	1793.39	1971.59	1849.09	6212.45	5717.74	4910.64	5277.8		Dapl1	death associated protein-like 1 [Source:MGI Symbol;Acc:MGI:1923997]	16.3332	0.685456	4.43016	1.80065e-05	0.000671509	14.4759	15.7702	19.762	15.3246	0	2.74183	0	0		Ammecr1	Alport syndrome, mental retardation, midface hypoplasia and elliptocytosis chromosomal region gene 1 [Source:MGI Symbol;Acc:MGI:1860206]
Sh2d2a	SH2 domain containing 2A [Source:MGI Symbol;Acc:MGI:1351596]	-1.09472	215.793	461.207	5.47413e-10	2.31094e-08	276.919	209.268	198.129	178.856	396.667	446.818	452.6	548.744		H2-T10	histocompatibility 2, T region locus 10 [Source:MGI Symbol;Acc:MGI:95942]	206.839	1040.54	-2.33182	1.59252e-50	9.38817e-49	203.266	181.068	203.99	239.031	865.929	1135.84	979.53	1180.86		Aif1	allograft inflammatory factor 1 [Source:MGI Symbol;Acc:MGI:1343098]	419.876	1157.6	-1.46149	1.86215e-05	0.000691762	422.357	450.435	397.037	409.676	649.989	786.904	2117.78	1075.74		E2f4	E2F transcription factor 4 [Source:MGI Symbol;Acc:MGI:103012]
Plscr2	phospholipid scramblase 2 [Source:MGI Symbol;Acc:MGI:1270860]	-2.32228	28.0488	140.472	5.91605e-10	2.48328e-08	14.7409	35.0498	40.0473	22.357	76.1279	163.491	127.159	195.109		Gngt2	guanine nucleotide binding protein (G protein), gamma transducing activity polypeptide 2 [Source:MGI Symbol;Acc:MGI:893584]	477.503	1641.42	-1.78137	1.76368e-50	1.03732e-48	488.434	448.575	454.131	518.872	1681.54	1669.65	1424.38	1790.12		Ank	progressive ankylosis [Source:MGI Symbol;Acc:MGI:3045421]	2186.39	775.296	1.49417	1.91674e-05	0.000709304	2257.39	1621.37	2583.44	2283.36	1316.27	616.911	357.755	810.247		Ybx3	Y box protein 3 [Source:MGI Symbol;Acc:MGI:2137670]
Gm19765	predicted gene, 19765 [Source:NCBI gene (formerly Entrezgene);Acc:102638993]	-2.10426	23.927	102.916	7.14064e-10	2.98597e-08	18.9526	29.8954	31.6163	15.2434	69.7172	126.684	108.84	106.423		Orai2	ORAI calcium release-activated calcium modulator 2 [Source:MGI Symbol;Acc:MGI:2443195]	638.402	1682.07	-1.39711	3.11068e-50	1.82536e-48	661.173	639.651	658.121	594.662	1653.46	1708.17	1691.72	1674.94		Ctsk	cathepsin K [Source:MGI Symbol;Acc:MGI:107823]	171.962	65.8265	1.39139	1.93328e-05	0.000712683	196.702	237.538	102.403	151.202	79.748	53.9226	81.4532	48.1822		Mmp8	matrix metallopeptidase 8 [Source:MGI Symbol;Acc:MGI:1202395]
Ednrb	endothelin receptor type B [Source:MGI Symbol;Acc:MGI:102720]	-2.16055	39.4832	176.579	8.28626e-10	3.43259e-08	46.3287	40.2042	35.8318	35.568	102.572	250.8	101.296	251.646		Jak2	Janus kinase 2 [Source:MGI Symbol;Acc:MGI:96629]	1711.63	5365.88	-1.64854	3.64313e-50	2.1329e-48	1678.99	1495.86	1811.91	1859.78	6020.54	5345.73	5164.99	4932.26		Gm49439	predicted gene, 49439 [Source:MGI Symbol;Acc:MGI:6155083]	8.64445	0	5.47951	2.01271e-05	0.000737726	8.51526	7.88508	8.98275	9.19473	0	0	0	0		Cip2a	cell proliferation regulating inhibitor of protein phosphatase 2A [Source:MGI Symbol;Acc:MGI:2146335]
Pltp	phospholipid transfer protein [Source:MGI Symbol;Acc:MGI:103151]	-1.26478	578.372	1389.85	8.32091e-10	3.4405e-08	666.501	522.655	579.632	544.698	1004.09	1787.27	967.703	1800.32		Enpp6	ectonucleotide pyrophosphatase/phosphodiesterase 6 [Source:MGI Symbol;Acc:MGI:2445171]	1194.66	212.417	2.4929	3.91762e-50	2.28836e-48	1291.07	1069.12	1254.4	1164.06	267.97	170.597	178.588	232.512		Clec4b1	C-type lectin domain family 4, member b1 [Source:MGI Symbol;Acc:MGI:1917060]	58.8522	122.689	-1.05804	2.07803e-05	0.000758778	58.7553	65.0519	50.3034	61.2982	93.4681	152.628	132.561	112.097		Cables2	CDK5 and Abl enzyme substrate 2 [Source:MGI Symbol;Acc:MGI:2182335]
Myh1	myosin, heavy polypeptide 1, skeletal muscle, adult [Source:MGI Symbol;Acc:MGI:1339711]	-5.7523	97.2512	5241.88	8.34507e-10	3.44406e-08	146.356	52.5747	114.873	75.2009	618.64	9129.82	915.977	10303.1		Ifi206	interferon activated gene 206 [Source:MGI Symbol;Acc:MGI:3646410]	226.253	1324.72	-2.5498	7.4215e-50	4.32514e-48	222.625	177.428	282.448	222.512	1480.27	1470.43	1263.11	1085.05		Lrrc10b	leucine rich repeat containing 10B [Source:MGI Symbol;Acc:MGI:2685551]	16.1015	0.428753	4.96497	2.40455e-05	0.000868751	10.2183	12.8133	26.05	15.3246	1.71501	0	0	0		Bach2	BTB and CNC homology, basic leucine zipper transcription factor 2 [Source:MGI Symbol;Acc:MGI:894679]
Kcnt1	potassium channel, subfamily T, member 1 [Source:MGI Symbol;Acc:MGI:1924627]	-2.73216	12.269	81.2789	8.65688e-10	3.54627e-08	7.37047	13.4014	24.2392	4.06491	88.9495	85.5974	84.0544	66.5144		Pgs1	phosphatidylglycerophosphate synthase 1 [Source:MGI Symbol;Acc:MGI:1921701]	1066.37	2618.43	-1.29583	9.48983e-50	5.51793e-48	1062.49	1071.85	1119.64	1011.51	2753.42	2551.25	2557.6	2611.45		Rasgrp3	RAS, guanyl releasing protein 3 [Source:MGI Symbol;Acc:MGI:3028579]	209.868	93.4991	1.15902	2.4063e-05	0.000868751	137.947	277.949	233.551	190.024	110.618	84.0827	75.0647	104.231		Mfng	MFNG O-fucosylpeptide 3-beta-N-acetylglucosaminyltransferase [Source:MGI Symbol;Acc:MGI:1095404]
Egr2	early growth response 2 [Source:MGI Symbol;Acc:MGI:95296]	-1.84494	39.4007	141.864	8.80439e-10	3.59339e-08	29.4819	37.1116	44.2628	46.7465	95.3603	154.075	120.693	197.326		Rps29	ribosomal protein S29 [Source:MGI Symbol;Acc:MGI:107681]	1340.79	3066.37	-1.19355	1.09821e-49	6.37109e-48	1347.66	1330.26	1299.63	1385.6	2965.22	3030.02	3146.4	3123.84		Susd3	sushi domain containing 3 [Source:MGI Symbol;Acc:MGI:1913579]	352.694	170.799	1.05174	2.49437e-05	0.000898861	293.776	399.182	367.394	350.421	184.364	103.275	215.611	179.946		Dbf4	DBF4 zinc finger [Source:MGI Symbol;Acc:MGI:1351328]
Kansl1l	KAT8 regulatory NSL complex subunit 1-like [Source:MGI Symbol;Acc:MGI:1915941]	1.0296	665.207	325.626	9.11087e-10	3.71163e-08	721.253	728.83	466.868	743.879	355.798	324.414	334.062	288.229		Coro2a	coronin, actin binding protein 2A [Source:MGI Symbol;Acc:MGI:1345966]	514.275	2113.73	-2.04022	1.42107e-49	8.22544e-48	444.505	576.869	443.978	591.747	2286.52	2227.66	1950.4	1990.34		Igfbp7	insulin-like growth factor binding protein 7 [Source:MGI Symbol;Acc:MGI:1352480]	576.746	284.228	1.01524	2.51095e-05	0.000902662	456.418	694.873	600.946	554.749	367.87	284.236	186.863	297.943		Cenpi	centromere protein I [Source:MGI Symbol;Acc:MGI:2147897]
B4galnt4	beta-1,4-N-acetyl-galactosaminyl transferase 4 [Source:MGI Symbol;Acc:MGI:2652891]	-1.48982	62.7007	176.1	9.14188e-10	3.71742e-08	63.1755	55.6674	81.1485	50.8114	145.044	201.154	149.789	208.412		Nfkb2	nuclear factor of kappa light polypeptide gene enhancer in B cells 2, p49/p100 [Source:MGI Symbol;Acc:MGI:1099800]	1233.37	3790.34	-1.62017	1.4349e-49	8.28673e-48	1087.06	1258.37	1373.47	1214.59	3968.06	4048.09	3704.9	3440.31		Nt5e	5' nucleotidase, ecto [Source:MGI Symbol;Acc:MGI:99782]	197.872	87.7529	1.15656	2.5143e-05	0.000902662	180.523	243.452	180.553	186.96	111.476	92.3081	47.9136	99.3143		Il6st	interleukin 6 signal transducer [Source:MGI Symbol;Acc:MGI:96560]
H2-DMb2	histocompatibility 2, class II, locus Mb2 [Source:MGI Symbol;Acc:MGI:95923]	1.22637	882.81	377.299	9.20906e-10	3.73786e-08	1135.05	881.4	671.32	843.47	293.293	489.617	302.811	423.475		Nrep	neuronal regeneration related protein [Source:MGI Symbol;Acc:MGI:99444]	1675.24	383.416	2.12796	1.76795e-49	1.01871e-47	1813.01	1384.85	1581.15	1921.96	438.815	353.3	372.33	369.22		Pdzk1	PDZ domain containing 1 [Source:MGI Symbol;Acc:MGI:1928901]	37.3783	4.91586	2.8373	2.52128e-05	0.000903482	25.5458	21.684	51.2017	51.0819	12.0051	2.74183	0	4.91655		Dock10	dedicator of cytokinesis 10 [Source:MGI Symbol;Acc:MGI:2146320]
Klra7	killer cell lectin-like receptor, subfamily A, member 7 [Source:MGI Symbol;Acc:MGI:101901]	2.10712	146.155	33.7926	9.357e-10	3.79096e-08	209.532	134.014	148.597	92.4768	46.4781	28.2471	18.3195	42.1258		Acp5	acid phosphatase 5, tartrate resistant [Source:MGI Symbol;Acc:MGI:87883]	376.949	2183.45	-2.53454	1.98878e-49	1.14337e-47	325.375	410.359	468.9	303.161	2501.83	2451.09	1850.82	1930.06		Fyb2	FYN binding protein 2 [Source:MGI Symbol;Acc:MGI:2685466]	23.6928	3.66106	2.59306	2.55642e-05	0.000912676	30.6549	20.6983	26.05	17.3678	6.00254	2.74183	0	5.89986		Fcrla	Fc receptor-like A [Source:MGI Symbol;Acc:MGI:2138647]
Dnase1l3	deoxyribonuclease 1-like 3 [Source:MGI Symbol;Acc:MGI:1314633]	-1.66833	249.075	791.567	9.44834e-10	3.82096e-08	155.833	217.515	426.82	196.132	747.656	864.534	545.276	1008.8		Cfl1	cofilin 1, non-muscle [Source:MGI Symbol;Acc:MGI:101757]	7863.07	22099.2	-1.49079	2.51412e-49	1.44215e-47	8124.69	7311.86	8211.28	7804.45	24784.3	23216.6	19982.4	20413.7		Tex11	testis expressed gene 11 [Source:MGI Symbol;Acc:MGI:1933237]	15.675	1.11421	3.65387	2.70382e-05	0.000961731	13.6244	18.7271	17.0672	13.2813	1.71501	2.74183	0	0		Arhgap4	Rho GTPase activating protein 4 [Source:MGI Symbol;Acc:MGI:2159577]
BC048679	cDNA sequence BC048679 [Source:MGI Symbol;Acc:MGI:3510776]	-6.95837	0.526462	64.6688	9.67212e-10	3.89292e-08	2.10585	0	0	0	83.3401	23.9673	94.8306	56.5373		Pycard	PYD and CARD domain containing [Source:MGI Symbol;Acc:MGI:1931465]	154.144	1119.73	-2.86439	2.67253e-49	1.52958e-47	110.196	130.114	198.452	177.816	1273.15	1166.66	1043.39	995.709		Ighv5-17	immunoglobulin heavy variable 5-17 [Source:MGI Symbol;Acc:MGI:4439533]	74.1899	1381.53	-4.21918	2.81792e-05	0.000998624	63.0129	78.8508	77.2516	77.6444	1658.42	2613.87	20.7626	1233.07		Hs3st3b1	heparan sulfate (glucosamine) 3-O-sulfotransferase 3B1 [Source:MGI Symbol;Acc:MGI:1333853]
Ighv8-5	immunoglobulin heavy variable V8-5 [Source:MGI Symbol;Acc:MGI:3645478]	-2.22631	29.2451	137.025	9.67773e-10	3.89292e-08	13.688	43.2968	29.5086	30.4869	161.071	83.0295	184.273	119.726		Itga4	integrin alpha 4 [Source:MGI Symbol;Acc:MGI:96603]	1433.09	6640.97	-2.21284	3.76864e-49	2.15209e-47	1109.4	1383.03	1467.62	1772.33	7083.06	7486.44	5836.05	6158.33		Peg13	paternally expressed 13 [Source:MGI Symbol;Acc:MGI:2663476]	719.404	358.206	1.00114	2.86897e-05	0.00101485	829.386	747.111	620.708	680.41	428.753	408.532	214.014	381.524		Faah	fatty acid amide hydrolase [Source:MGI Symbol;Acc:MGI:109609]
Gbp5	guanylate binding protein 5 [Source:MGI Symbol;Acc:MGI:2429943]	-3.24129	507.41	4798.08	9.67906e-10	3.89292e-08	366.418	245.349	1087.6	330.274	3380.08	5741.02	3749.04	6322.2		Tapbpl	TAP binding protein-like [Source:MGI Symbol;Acc:MGI:2384853]	655.22	3266.48	-2.31661	6.41029e-49	3.65243e-47	778.814	658.759	685.812	497.495	3559.67	3610.05	3251.39	2644.82		Igkv6-17	immunoglobulin kappa variable 6-17 [Source:MGI Symbol;Acc:MGI:1330833]	72.9901	946.802	-3.69748	3.08494e-05	0.00108924	38.3187	63.0806	137.436	53.1251	1419.17	1206.4	49.5108	1112.12		Gpd1l	glycerol-3-phosphate dehydrogenase 1-like [Source:MGI Symbol;Acc:MGI:1289257]
Ptgs2	prostaglandin-endoperoxide synthase 2 [Source:MGI Symbol;Acc:MGI:97798]	-1.54236	54.4033	158.784	1.0007e-09	4.01751e-08	56.8579	50.513	42.1551	68.0873	130.62	162.635	139.013	202.869		Tmem268	transmembrane protein 268 [Source:MGI Symbol;Acc:MGI:1913920]	405.268	1779.91	-2.13624	1.15776e-48	6.58193e-47	353.668	339.388	441.209	486.807	1920.25	1863.36	1600.8	1735.23		Trp53i11	transformation related protein 53 inducible protein 11 [Source:MGI Symbol;Acc:MGI:2670995]	833.691	377.241	1.13956	3.11215e-05	0.00109542	797.028	904.813	838.09	794.834	535.083	375.63	198.043	400.207		Scn4a	sodium channel, voltage-gated, type IV, alpha [Source:MGI Symbol;Acc:MGI:98250]
Klra14-ps	killer cell lectin-like receptor subfamily A, member 14, pseudogene [Source:MGI Symbol;Acc:MGI:1321089]	5.44598	41.8406	1.03177	1.0234e-09	4.09423e-08	61.0696	50.513	25.293	30.4869	0.801347	0	0	3.32572		Psma5	proteasome subunit alpha 5 [Source:MGI Symbol;Acc:MGI:1347009]	605.206	2117.83	-1.80596	1.24137e-48	7.04157e-47	694.678	592.337	555.665	578.144	2157.8	1974.52	1943.91	2395.08		Derl3	Der1-like domain family, member 3 [Source:MGI Symbol;Acc:MGI:1917627]	109.092	227.146	-1.0644	3.21466e-05	0.00112472	80.8949	103.492	136.538	115.445	244.389	265.043	153.324	245.827		Lat2	linker for activation of T cells family, member 2 [Source:MGI Symbol;Acc:MGI:1926479]
Gm10371	predicted gene 10371 [Source:MGI Symbol;Acc:MGI:3642716]	1.31451	228.098	91.212	1.02351e-09	4.09423e-08	225.326	237.102	221.314	228.651	115.394	95.8691	94.8306	58.7544		Hr	lysine demethylase and nuclear receptor corepressor [Source:MGI Symbol;Acc:MGI:96223]	990.055	181.02	2.45189	1.29304e-48	7.31845e-47	950.064	861.664	1085.48	1063.01	193.079	214.622	179.671	136.708		Gm15411	predicted gene 15411 [Source:MGI Symbol;Acc:MGI:3705213]	27.3894	6.70553	2.03587	3.33154e-05	0.00116139	22.9912	31.5403	23.3551	31.6707	8.57506	7.31154	7.98561	2.94993		Cd5l	CD5 antigen-like [Source:MGI Symbol;Acc:MGI:1334419]
Nrp2	neuropilin 2 [Source:MGI Symbol;Acc:MGI:1100492]	-1.07294	432.258	909.567	1.06294e-09	4.23664e-08	479.081	393.795	412.066	444.092	717.205	1069.11	711.229	1140.72		Slamf1	signaling lymphocytic activation molecule family member 1 [Source:MGI Symbol;Acc:MGI:1351314]	45.511	539.541	-3.57354	1.76994e-48	9.99546e-47	31.2717	55.5031	54.4588	40.8101	511.366	629.557	395.059	622.184		Apol7c	apolipoprotein L 7c [Source:MGI Symbol;Acc:MGI:1920912]	6.68739	37.0683	-2.47864	3.38113e-05	0.00117442	7.66373	9.85635	7.1862	2.04327	37.7302	51.1807	11.1798	48.1822		Nfia	nuclear factor I/A [Source:MGI Symbol;Acc:MGI:108056]
Scarf1	scavenger receptor class F, member 1 [Source:MGI Symbol;Acc:MGI:2449455]	-1.33435	201.017	506.905	1.07932e-09	4.29416e-08	143.198	181.434	306.678	172.759	450.357	537.552	467.687	572.024		Serpina3n	serine (or cysteine) peptidase inhibitor, clade A, member 3N [Source:MGI Symbol;Acc:MGI:105045]	266.566	2830.19	-3.40935	2.71988e-48	1.53262e-46	212.945	280.245	299.062	274.011	1967.06	1922.79	3388.85	4042.04		Gm6093	predicted gene 6093 [Source:MGI Symbol;Acc:MGI:3648840]	0	8.42815	-5.62294	3.55496e-05	0.00122595	0	0	0	0	6.86004	7.31154	4.79136	14.7496		Cd83	CD83 antigen [Source:MGI Symbol;Acc:MGI:1328316]
Gbp6	guanylate binding protein 6 [Source:MGI Symbol;Acc:MGI:2140937]	-3.72867	101.462	1344.82	1.08386e-09	4.3045e-08	80.0223	44.3277	227.637	53.8601	830.996	1788.99	885.804	1873.49		Myof	myoferlin [Source:MGI Symbol;Acc:MGI:1919192]	3059.9	8595.35	-1.49009	2.89125e-48	1.6256e-46	3062.39	2720.56	3154.92	3301.73	9596.59	8282.19	8019.16	8483.44		Plek2	pleckstrin 2 [Source:MGI Symbol;Acc:MGI:1351466]	259.527	673.112	-1.3748	3.74089e-05	0.00127861	308.252	270.064	222.772	237.02	306.987	1057.43	630.863	697.167		Plekhm3	pleckstrin homology domain containing, family M, member 3 [Source:MGI Symbol;Acc:MGI:2443627]
Slc9a7	solute carrier family 9 (sodium/hydrogen exchanger), member 7 [Source:MGI Symbol;Acc:MGI:2444530]	1.67419	269.508	84.527	1.12415e-09	4.44853e-08	263.231	355.653	137.004	322.144	72.9225	92.4452	84.0544	88.6859		Ido1	indoleamine 2,3-dioxygenase 1 [Source:MGI Symbol;Acc:MGI:96416]	23.0127	284.234	-3.63154	4.71439e-48	2.64482e-46	20.1032	23.6571	23.9988	24.2917	335.84	234.433	280.329	286.334		Mreg	melanoregulin [Source:MGI Symbol;Acc:MGI:2151839]	114.703	48.1669	1.28234	3.97602e-05	0.00134939	99.6285	111.377	144.622	103.185	38.5877	37.4716	78.2589	38.3491		Zdhhc18	zinc finger, DHHC domain containing 18 [Source:MGI Symbol;Acc:MGI:3527792]
Frmd4b	FERM domain containing 4B [Source:MGI Symbol;Acc:MGI:2141794]	-1.22084	394.264	919.376	1.12671e-09	4.4507e-08	359.047	418.536	389.934	409.54	665.919	1050.28	686.444	1274.86		Evl	Ena-vasodilator stimulated phosphoprotein [Source:MGI Symbol;Acc:MGI:1194884]	1503.39	4902.22	-1.70532	4.77709e-48	2.67412e-46	1409.46	1521.33	1592.23	1490.54	5663.64	5219.16	4417.08	4309		Sparc	secreted acidic cysteine rich glycoprotein [Source:MGI Symbol;Acc:MGI:98373]	1005.46	446.529	1.16732	4.08834e-05	0.00138257	1002.25	953.109	1080.62	985.88	634.554	479.819	220.403	451.339		Tbc1d10c	TBC1 domain family, member 10c [Source:MGI Symbol;Acc:MGI:1922072]
Loxl3	lysyl oxidase-like 3 [Source:MGI Symbol;Acc:MGI:1337004]	-1.19267	114.358	261.576	1.17282e-09	4.60814e-08	93.7103	115.458	122.25	126.012	210.754	308.151	241.387	286.012		Ftl1	ferritin light polypeptide 1 [Source:MGI Symbol;Acc:MGI:95589]	8405.38	30558	-1.86218	6.1397e-48	3.42936e-46	7826.11	8829.55	8878.64	8087.21	37323.9	30451	24802.1	29654.9		Cd209g	CD209g antigen [Source:MGI Symbol;Acc:MGI:1917442]	16.1652	0.828033	4.38564	4.1374e-05	0.00139432	28.1004	7.88508	14.3724	14.3029	1.71501	0	1.59712	0		Cenpl	centromere protein L [Source:MGI Symbol;Acc:MGI:1917704]
Clec4a1	C-type lectin domain family 4, member a1 [Source:MGI Symbol;Acc:MGI:3036291]	-1.15315	881.61	1961.09	1.27483e-09	4.98242e-08	903.409	854.597	944.274	824.161	1337.45	2296.58	1545.31	2665.01		Arhgef37	Rho guanine nucleotide exchange factor (GEF) 37 [Source:MGI Symbol;Acc:MGI:3045339]	151.195	796.614	-2.40179	6.44684e-48	3.59306e-46	115.407	167.419	141.224	180.731	803.909	746.223	812.847	823.478		Cfd	complement factor D (adipsin) [Source:MGI Symbol;Acc:MGI:87931]	36.7555	11.7999	1.64017	4.15774e-05	0.00139873	41.7248	44.3536	32.3379	28.6058	11.1476	9.13942	11.1798	15.733		Daam1	dishevelled associated activator of morphogenesis 1 [Source:MGI Symbol;Acc:MGI:1914596]
Ahdc1	AT hook, DNA binding motif, containing 1 [Source:MGI Symbol;Acc:MGI:2444218]	1.00337	515.409	257.496	1.2789e-09	4.98953e-08	509.615	639.144	406.797	506.082	235.596	243.097	258.629	292.664		Mmp25	matrix metallopeptidase 25 [Source:MGI Symbol;Acc:MGI:2443938]	207.156	865.831	-2.06492	6.92651e-48	3.85198e-46	195.076	191.986	213.22	228.342	766.464	964.146	920	812.714		Il33	interleukin 33 [Source:MGI Symbol;Acc:MGI:1924375]	24.8718	2.40047	3.24223	4.29088e-05	0.00143754	19.5851	15.7702	31.4396	32.6924	6.86004	2.74183	0	0		Cers4	ceramide synthase 4 [Source:MGI Symbol;Acc:MGI:1914510]
Adap2	ArfGAP with dual PH domains 2 [Source:MGI Symbol;Acc:MGI:2663075]	-1.62035	134.891	415.018	1.46504e-09	5.67567e-08	175.838	118.551	92.7412	152.434	257.232	499.033	336.217	567.59		Atp13a2	ATPase type 13A2 [Source:MGI Symbol;Acc:MGI:1922022]	2625.75	7616.25	-1.53632	7.2225e-48	4.00786e-46	2561.3	2877.06	2631.56	2433.06	7987.61	8266.78	6594.78	7615.83		Stac	src homology three (SH3) and cysteine rich domain [Source:MGI Symbol;Acc:MGI:1201400]	7.94891	0	5.35827	4.29551e-05	0.00143754	8.51526	6.89944	7.1862	9.19473	0	0	0	0		Il5ra	interleukin 5 receptor, alpha [Source:MGI Symbol;Acc:MGI:96558]
H2-DMb1	histocompatibility 2, class II, locus Mb1 [Source:MGI Symbol;Acc:MGI:95922]	-1.31353	1103.78	2743.28	1.5322e-09	5.9255e-08	865.504	885.523	1778.94	885.135	2327.91	3242.43	2329.81	3072.97		Mlkl	mixed lineage kinase domain-like [Source:MGI Symbol;Acc:MGI:1921818]	219.576	1572.62	-2.84257	9.20723e-48	5.09813e-46	166.038	167.419	299.985	244.861	1708.45	1645.43	1587.81	1348.78		C2	complement component 2 (within H-2S) [Source:MGI Symbol;Acc:MGI:88226]	21.7242	60.7998	-1.46237	4.33007e-05	0.00144659	22.9912	19.7127	27.8465	16.3462	42.8753	54.8365	89.4388	56.0487		Nlrc3	NLR family, CARD domain containing 3 [Source:MGI Symbol;Acc:MGI:2444070]
C4b	complement component 4B (Chido blood group) [Source:MGI Symbol;Acc:MGI:88228]	-2.31284	1198.31	5953.8	1.56305e-09	6.03425e-08	806.54	979.333	2172.04	835.34	5164.68	7179.91	4547.56	6923.04		Lacc1	laccase domain containing 1 [Source:MGI Symbol;Acc:MGI:2445077]	643.884	3135.9	-2.28527	9.27181e-48	5.12277e-46	484.711	597.796	690.427	802.599	3542.12	3170.9	2863.91	2966.68		Havcr1	hepatitis A virus cellular receptor 1 [Source:MGI Symbol;Acc:MGI:2159680]	125.334	55.3835	1.19639	4.38107e-05	0.00146109	166.048	103.492	134.741	97.0555	42.0178	45.6971	71.8705	61.9485		Trib2	tribbles pseudokinase 2 [Source:MGI Symbol;Acc:MGI:2145021]
Nt5e	5' nucleotidase, ecto [Source:MGI Symbol;Acc:MGI:99782]	1.30041	458.217	186.352	1.56934e-09	6.04797e-08	460.128	511.315	331.971	529.455	205.946	119.836	211.214	208.412		Pstpip1	proline-serine-threonine phosphatase-interacting protein 1 [Source:MGI Symbol;Acc:MGI:1321396]	690.047	3048.73	-2.14461	9.41708e-48	5.1918e-46	542.043	706.073	679.351	832.721	3132.55	3015.71	2616.05	3430.62		Trim36	tripartite motif-containing 36 [Source:MGI Symbol;Acc:MGI:106264]	94.302	38.2304	1.28112	4.66571e-05	0.0015453	83.4495	101.52	88.0309	104.207	39.4453	59.4062	25.5539	28.516		Cd96	CD96 antigen [Source:MGI Symbol;Acc:MGI:1934368]
C1qc	complement component 1, q subcomponent, C chain [Source:MGI Symbol;Acc:MGI:88225]	-2.86295	872.1	6344.38	1.60783e-09	6.17479e-08	648.601	565.952	1693.58	580.266	4534.82	8043.59	4185.48	8613.62		Uba7	ubiquitin-like modifier activating enzyme 7 [Source:MGI Symbol;Acc:MGI:1349462]	2344.37	6722.81	-1.5203	1.04027e-47	5.72284e-46	2051.27	2250.15	2451.57	2624.48	6537.76	6423.24	6703.01	7227.23		Cacna1e	calcium channel, voltage-dependent, R type, alpha 1E subunit [Source:MGI Symbol;Acc:MGI:106217]	302.085	128.278	1.22974	4.76331e-05	0.00157222	262.27	451.421	221.874	272.777	182.649	127.952	102.216	100.298		Ddx39a	DEAD box helicase 39a [Source:MGI Symbol;Acc:MGI:1915528]
Fzd1	frizzled class receptor 1 [Source:MGI Symbol;Acc:MGI:1196625]	-1.23455	116	273.022	1.6253e-09	6.23106e-08	140.039	95.8716	98.0106	130.077	260.438	285.895	219.835	325.921		Hk2	hexokinase 2 [Source:MGI Symbol;Acc:MGI:1315197]	588.825	2786.71	-2.24367	1.1421e-47	6.26951e-46	488.434	546.842	617.508	702.517	2889.16	3328.29	2627.95	2301.43		Lonrf2	LON peptidase N-terminal domain and ring finger 2 [Source:MGI Symbol;Acc:MGI:1920209]	35.5451	2.44926	3.76819	4.87389e-05	0.00160322	69.8251	2.9569	37.7275	31.6707	6.00254	1.82788	0	1.96662		Psd4	pleckstrin and Sec7 domain containing 4 [Source:MGI Symbol;Acc:MGI:2674093]
Aldh3b2	aldehyde dehydrogenase 3 family, member B2 [Source:MGI Symbol;Acc:MGI:2147613]	1.6433	138.594	43.9534	1.6454e-09	6.29722e-08	162.15	140.199	113.819	138.207	54.4916	54.7823	37.7167	28.8229		Ninj1	ninjurin 1 [Source:MGI Symbol;Acc:MGI:1196617]	1136.14	6773.36	-2.57525	1.44242e-47	7.90112e-46	1417.65	863.483	1135.33	1128.11	8757.58	6511.29	5297.04	6527.55		Slc32a1	solute carrier family 32 (GABA vesicular transporter), member 1 [Source:MGI Symbol;Acc:MGI:1194488]	20.2586	2.25223	3.04426	5.02614e-05	0.00165048	11.0698	20.6983	20.6603	28.6058	5.14503	0.913942	0	2.94993		Adgre5	adhesion G protein-coupled receptor E5 [Source:MGI Symbol;Acc:MGI:1347095]
Atf3	activating transcription factor 3 [Source:MGI Symbol;Acc:MGI:109384]	-1.66028	166.852	527.576	1.7368e-09	6.60131e-08	196.897	163.909	162.297	144.304	325.347	651.396	326.519	807.042		Oas1g	2'-5' oligoadenylate synthetase 1G [Source:MGI Symbol;Acc:MGI:97429]	107.628	885.912	-3.04627	1.50141e-47	8.20664e-46	78.1792	82.7998	121.84	147.694	864.758	975.153	936.236	767.503		Alpl	alkaline phosphatase, liver/bone/kidney [Source:MGI Symbol;Acc:MGI:87983]	183.523	88.5108	1.0388	5.04359e-05	0.00165237	189.89	160.658	167.977	215.565	102.901	78.599	57.4964	115.047		St8sia1	ST8 alpha-N-acetyl-neuraminide alpha-2,8-sialyltransferase 1 [Source:MGI Symbol;Acc:MGI:106011]
Zfp992	zinc finger protein 992 [Source:MGI Symbol;Acc:MGI:3700963]	-1.05481	131.998	274.425	1.85483e-09	7.02579e-08	103.187	134.014	146.489	144.304	246.013	290.175	288.802	272.709		Rnf213	ring finger protein 213 [Source:MGI Symbol;Acc:MGI:1289196]	4581.16	14021.6	-1.61395	4.52986e-47	2.47071e-45	4238.06	4240.99	5464.34	4381.26	13968.4	14567.9	14752.5	12797.8		Per1	period circadian clock 1 [Source:MGI Symbol;Acc:MGI:1098283]	445.224	1222.57	-1.45827	5.18582e-05	0.00167492	510.915	552.941	365.598	351.443	1547.8	1725.52	474.345	1142.61		Ckap2l	cytoskeleton associated protein 2-like [Source:MGI Symbol;Acc:MGI:1917716]
Ifi205	interferon activated gene 205 [Source:MGI Symbol;Acc:MGI:101847]	-2.73648	163.11	1087.01	1.87294e-09	7.08226e-08	185.315	103.088	233.961	130.077	568.155	1410.64	648.727	1720.51		Lgals3bp	lectin, galactoside-binding, soluble, 3 binding protein [Source:MGI Symbol;Acc:MGI:99554]	4147.63	19295.6	-2.21797	4.90671e-47	2.67055e-45	3865.78	3302.89	5116.36	4305.47	21650.6	18142.7	21669.8	15719.3		Gm43305	predicted gene 43305 [Source:MGI Symbol;Acc:MGI:5663442]	670.054	253.519	1.40052	5.18763e-05	0.00167492	271.637	1020.13	669.215	719.232	249.534	270.527	210.82	283.193		Slc29a1	solute carrier family 29 (nucleoside transporters), member 1 [Source:MGI Symbol;Acc:MGI:1927073]
Nlrp1b	NLR family, pyrin domain containing 1B [Source:MGI Symbol;Acc:MGI:3582959]	-1.56454	71.1404	210.704	2.0072e-09	7.53842e-08	45.2757	83.501	65.3404	90.4443	182.707	222.553	165.953	271.601		Coa5	cytochrome C oxidase assembly factor 5 [Source:MGI Symbol;Acc:MGI:1923428]	1773.29	6194.09	-1.80448	8.81768e-47	4.78894e-45	1687.93	1746.07	1957.75	1701.39	7430.6	6408.93	5550.31	5386.52		Ighv1-41	immunoglobulin heavy variable 1-41 [Source:MGI Symbol;Acc:MGI:3649084]	57.7788	18.8634	1.58051	5.20076e-05	0.00167635	54.4977	66.0375	50.3034	60.2766	27.4402	11.8812	9.58273	26.5494		Tfr2	transferrin receptor 2 [Source:MGI Symbol;Acc:MGI:1354956]
A530030E21Rik	RIKEN cDNA A530030E21 gene [Source:MGI Symbol;Acc:MGI:2444617]	1.97529	92.0326	23.214	2.0456e-09	7.66962e-08	102.134	114.427	61.1249	90.4443	28.0471	26.5352	18.3195	19.9543		Grn	granulin [Source:MGI Symbol;Acc:MGI:95832]	7345.71	29177.5	-1.9899	9.07531e-47	4.91839e-45	6883.5	6556.65	9099.24	6843.47	32919.3	31980.8	26933.3	24876.6		Gm11346	predicted gene 11346 [Source:MGI Symbol;Acc:MGI:1923274]	79.966	34.6439	1.20731	5.32163e-05	0.00171203	64.716	101.52	79.0482	74.5795	43.7328	24.6764	36.7338	33.4325		Cdc25a	cell division cycle 25A [Source:MGI Symbol;Acc:MGI:103198]
Anxa4	annexin A4 [Source:MGI Symbol;Acc:MGI:88030]	-1.42668	557.146	1497.97	2.06026e-09	7.71149e-08	560.156	474.203	687.128	507.098	902.316	1905.4	1069	2115.16		Arhgap9	Rho GTPase activating protein 9 [Source:MGI Symbol;Acc:MGI:2143764]	636.712	2850.35	-2.16281	9.16328e-47	4.95555e-45	550.233	826.178	598.124	572.314	2830.65	3238.03	2569.51	2763.23		Csta2	cystatin A family member 2 [Source:MGI Symbol;Acc:MGI:1924020]	0	7.72596	-5.49414	5.32924e-05	0.00171203	0	0	0	0	7.71755	11.8812	6.38849	4.91655		Mef2c	myocyte enhancer factor 2C [Source:MGI Symbol;Acc:MGI:99458]
Fbxw17	F-box and WD-40 domain protein 17 [Source:MGI Symbol;Acc:MGI:1923584]	-1.01194	238.879	481.955	2.08913e-09	7.80635e-08	216.902	222.669	276.116	239.83	409.488	528.992	407.34	582.001		Slc2a6	solute carrier family 2 (facilitated glucose transporter), member 6 [Source:MGI Symbol;Acc:MGI:2443286]	124.956	2080.52	-4.06161	1.51887e-46	8.19677e-45	76.6901	81.8899	107.072	234.172	2213.97	2331.12	1926.59	1850.4		Gm39321	predicted gene, 39321 [Source:MGI Symbol;Acc:MGI:5622206]	132.001	38.0413	1.7686	5.39292e-05	0.0017296	103.035	165.587	134.741	124.64	62.5979	39.2995	7.98561	42.2823		Ftsj1	FtsJ RNA methyltransferase homolog 1 (E. coli) [Source:MGI Symbol;Acc:MGI:1859648]
Hal	histidine ammonia lyase [Source:MGI Symbol;Acc:MGI:96010]	-1.22717	132.235	309.685	2.31187e-09	8.552e-08	142.145	105.149	174.944	106.704	264.444	307.295	359.925	307.075		Zfta	zinc finger translocation associated [Source:MGI Symbol;Acc:MGI:1919667]	2631.46	805.949	1.70696	1.52938e-46	8.23604e-45	2717.66	2558.6	2828.17	2421.4	706.785	937.731	813.93	765.351		ENSMUSG00000121193	novel transcript, antisense to KO:Pdzrn3and Pdzrn3	14.4663	0.456971	4.79255	5.41687e-05	0.00173439	14.4759	15.7702	7.1862	20.4327	0	1.82788	0	0		Ptk2b	PTK2 protein tyrosine kinase 2 beta [Source:MGI Symbol;Acc:MGI:104908]
5730488B01Rik	RIKEN cDNA 5730488B01 gene [Source:MGI Symbol;Acc:MGI:1917852]	3.99592	37.0225	2.2611	2.41171e-09	8.90642e-08	30.5348	48.4512	28.4547	40.6491	4.00673	1.71195	0	3.32572		Cstb	cystatin B [Source:MGI Symbol;Acc:MGI:109514]	448.242	2399.54	-2.42049	1.87721e-46	1.00879e-44	430.358	491.339	430.133	441.138	2864.59	1955.81	1870.31	2907.47		Bcl2a1d	B cell leukemia/lymphoma 2 related protein A1d [Source:MGI Symbol;Acc:MGI:1278325]	51.9825	125.752	-1.27215	5.52952e-05	0.00176752	39.1702	46.3248	45.812	76.6228	82.3205	124.296	159.712	136.68		Odc1	ornithine decarboxylase, structural 1 [Source:MGI Symbol;Acc:MGI:97402]
Klf15	Kruppel-like factor 15 [Source:MGI Symbol;Acc:MGI:1929988]	-2.8103	17.1222	120.355	2.51079e-09	9.22612e-08	16.8468	13.4014	17.9159	20.3246	45.6768	131.82	71.1229	232.801		Cd247	CD247 antigen [Source:MGI Symbol;Acc:MGI:88334]	74.6234	899.275	-3.59356	2.94678e-46	1.58024e-44	58.076	54.5933	124.609	61.2152	1029.75	897.008	733.835	936.505		Tceal3	transcription elongation factor A (SII)-like 3 [Source:MGI Symbol;Acc:MGI:1913354]	32.3166	5.08076	2.59389	5.59912e-05	0.0017868	33.2095	11.8276	41.3206	42.9088	5.14503	7.31154	0	7.86648		Inpp4b	inositol polyphosphate-4-phosphatase, type II [Source:MGI Symbol;Acc:MGI:2158925]
Fblim1	filamin binding LIM protein 1 [Source:MGI Symbol;Acc:MGI:1921452]	-1.66535	113.746	360.87	2.64313e-09	9.69631e-08	150.568	79.3775	126.465	98.5742	209.953	471.642	298.501	463.384		Tnxb	tenascin XB [Source:MGI Symbol;Acc:MGI:1932137]	2420.37	438.331	2.4653	3.42144e-46	1.83093e-44	1954.48	2373.9	2485.72	2867.4	505.515	471.067	311.718	465.023		Timd4	T cell immunoglobulin and mucin domain containing 4 [Source:MGI Symbol;Acc:MGI:2445125]	57.6956	13.3083	2.09649	5.69784e-05	0.00180971	34.061	58.1525	54.7948	83.7742	22.2951	3.65577	9.58273	17.6996		Klhl24	kelch-like 24 [Source:MGI Symbol;Acc:MGI:1923035]
Hcn2	hyperpolarization-activated, cyclic nucleotide-gated K+ 2 [Source:MGI Symbol;Acc:MGI:1298210]	-2.49598	21.5763	121.374	2.70981e-09	9.89169e-08	29.4819	25.7719	15.8082	15.2434	152.256	177.187	47.4153	108.64		Neurl3	neuralized E3 ubiquitin protein ligase 3 [Source:MGI Symbol;Acc:MGI:2429944]	1020.31	4177.89	-2.03427	3.72837e-46	1.99101e-44	825.722	1307.51	944.261	1003.73	4482.94	4169.16	3964.66	4094.79		H2-Q6	histocompatibility 2, Q region locus 6 [Source:MGI Symbol;Acc:MGI:95935]	118.174	355.592	-1.59045	5.71835e-05	0.00181282	199.257	70.9657	65.5741	136.899	385.02	456.057	194.849	386.441		Pheta2	PH domain containing endocytic trafficking adaptor 2 [Source:MGI Symbol;Acc:MGI:2443609]
Gh	growth hormone [Source:MGI Symbol;Acc:MGI:95707]	3.88407	34.7924	2.35748	2.77948e-09	1.01127e-07	42.117	41.2351	26.3469	29.4706	1.60269	3.4239	1.07762	3.32572		Btnl9	butyrophilin-like 9 [Source:MGI Symbol;Acc:MGI:2442439]	1042.9	98.8449	3.39708	4.3337e-46	2.30944e-44	906.879	860.754	1178.71	1225.28	67.8701	73.7418	147.2	106.568		Crisp3	cysteine-rich secretory protein 3 [Source:MGI Symbol;Acc:MGI:102552]	10.2915	0	5.73373	5.81172e-05	0.00183939	20.4366	2.9569	4.49137	13.2813	0	0	0	0		Klhl14	kelch-like 14 [Source:MGI Symbol;Acc:MGI:1921249]
Pdcd1lg2	programmed cell death 1 ligand 2 [Source:MGI Symbol;Acc:MGI:1930125]	-2.17216	27.5665	124.214	3.03444e-09	1.09502e-07	50.5404	15.4632	15.8082	28.4544	104.976	141.236	112.072	138.572		Tapbp	TAP binding protein [Source:MGI Symbol;Acc:MGI:1201689]	5333.87	17262.9	-1.69438	4.4894e-46	2.38743e-44	5399.58	4798.75	6161.23	4975.92	19249.4	17935.8	17048.1	14818.3		Des	desmin [Source:MGI Symbol;Acc:MGI:94885]	15.3408	52.3602	-1.7556	6.08784e-05	0.00191693	16.179	16.7558	16.1689	12.2596	59.1679	22.8485	78.2589	49.1655		Foxm1	forkhead box M1 [Source:MGI Symbol;Acc:MGI:1347487]
Sbf2	SET binding factor 2 [Source:MGI Symbol;Acc:MGI:1921831]	-1.13588	209.568	460.912	3.35074e-09	1.20523e-07	199.003	226.793	196.021	216.457	345.38	528.136	381.478	588.653		Sh2b2	SH2B adaptor protein 2 [Source:MGI Symbol;Acc:MGI:1345171]	154.963	710.577	-2.19438	4.57934e-46	2.43019e-44	181.674	136.483	138.455	163.241	754.762	685.689	651.577	750.28		Usp44	ubiquitin specific peptidase 44 [Source:MGI Symbol;Acc:MGI:3045318]	8.7742	50.3738	-2.51593	6.09657e-05	0.00191693	15.3275	14.7845	0.898275	4.08655	50.5928	64.8899	57.4964	28.516		Snx30	sorting nexin family member 30 [Source:MGI Symbol;Acc:MGI:2443882]
H2-Q4	histocompatibility 2, Q region locus 4 [Source:MGI Symbol;Acc:MGI:95933]	-1.23762	3408.22	8036.62	3.35756e-09	1.20573e-07	2803.94	2632.86	5609.79	2586.3	7910.89	8589.7	7119.84	8526.04		Npnt	nephronectin [Source:MGI Symbol;Acc:MGI:2148811]	1364.7	363.452	1.90955	5.23137e-46	2.77045e-44	1382.66	1219.25	1471.31	1385.6	421.263	361.005	364.753	306.786		Susd2	sushi domain containing 2 [Source:MGI Symbol;Acc:MGI:1918983]	73.7593	176.1	-1.25888	6.15073e-05	0.00193081	75.7858	55.1955	70.0654	93.9906	117.478	261.387	135.755	189.779		Plek2	pleckstrin 2 [Source:MGI Symbol;Acc:MGI:1351466]
Mme	membrane metallo endopeptidase [Source:MGI Symbol;Acc:MGI:97004]	1.06445	408.539	194.974	3.46582e-09	1.23857e-07	445.387	445.339	300.355	443.076	224.377	198.586	193.972	162.96		Ptpn22	protein tyrosine phosphatase, non-receptor type 22 (lymphoid) [Source:MGI Symbol;Acc:MGI:107170]	282.374	2284.72	-3.01858	5.47981e-46	2.89602e-44	180.185	321.19	250.141	377.98	2539.28	2502.82	1742.59	2354.18		Nkd2	naked cuticle 2 [Source:MGI Symbol;Acc:MGI:1919543]	24.9527	6.0848	2.02174	6.20629e-05	0.00194508	19.5851	30.5547	25.1517	24.5193	5.14503	4.56971	4.79136	9.8331		Chaf1a	chromatin assembly factor 1, subunit A (p150) [Source:MGI Symbol;Acc:MGI:1351331]
Mmp13	matrix metallopeptidase 13 [Source:MGI Symbol;Acc:MGI:1340026]	-1.4494	562.85	1537.04	3.47454e-09	1.23968e-07	831.81	412.351	658.673	348.566	1137.91	1832.64	1297.45	1880.14		Cyfip2	cytoplasmic FMR1 interacting protein 2 [Source:MGI Symbol;Acc:MGI:1924134]	2153.78	6151.05	-1.51394	5.67e-46	2.99034e-44	2119.77	2300.2	2074.97	2120.18	6416.06	6944.94	5870.68	5372.52		Igfbp2	insulin-like growth factor binding protein 2 [Source:MGI Symbol;Acc:MGI:96437]	1.40909	15.1633	-3.43103	6.33551e-05	0.00197913	0	0	3.5931	2.04327	16.2926	14.6231	15.9712	13.7663		Rara	retinoic acid receptor, alpha [Source:MGI Symbol;Acc:MGI:97856]
Apol6	apolipoprotein L 6 [Source:MGI Symbol;Acc:MGI:1919189]	-4.02277	18.309	297.36	3.56882e-09	1.27127e-07	13.688	8.24702	42.1551	9.14606	155.461	433.123	154.1	446.755		Tfec	transcription factor EC [Source:MGI Symbol;Acc:MGI:1333760]	56.9577	593.19	-3.38159	7.3769e-46	3.88253e-44	61.7988	41.8548	40.6134	83.5636	581.576	553.614	529.271	708.299		Ggt1	gamma-glutamyltransferase 1 [Source:MGI Symbol;Acc:MGI:95706]	62.9682	28.898	1.13616	6.41433e-05	0.00199404	62.1614	56.1812	69.1672	64.3631	32.5852	21.9346	33.5395	27.5327		Dennd4b	DENN/MADD domain containing 4B [Source:MGI Symbol;Acc:MGI:2446201]
Lynx1	Ly6/neurotoxin 1 [Source:MGI Symbol;Acc:MGI:1345180]	1.2954	675.804	275.028	3.60615e-09	1.28044e-07	830.757	693.78	479.514	699.165	283.677	342.39	169.186	304.858		Unc13b	unc-13 homolog B [Source:MGI Symbol;Acc:MGI:1342278]	3526.56	953.595	1.88646	9.56307e-46	5.02278e-44	3602.2	3674.13	3429.06	3400.84	795.718	835.373	1033.65	1149.64		Lgr5	leucine rich repeat containing G protein coupled receptor 5 [Source:MGI Symbol;Acc:MGI:1341817]	124.06	52.2627	1.27166	6.53194e-05	0.00202732	110.698	102.506	141.029	142.008	46.3053	30.1601	81.4532	51.1321		Arhgap25	Rho GTPase activating protein 25 [Source:MGI Symbol;Acc:MGI:2443687]
F10	coagulation factor X [Source:MGI Symbol;Acc:MGI:103107]	-1.00192	1217.94	2439.28	3.77349e-09	1.33344e-07	934.997	1111.29	1745.22	1080.25	2250.18	2360.78	2618.62	2527.55		Ly86	lymphocyte antigen 86 [Source:MGI Symbol;Acc:MGI:1321404]	561.923	3502.04	-2.64008	1.39004e-45	7.28587e-44	460.141	638.741	713.503	435.308	3952.85	3960.04	3431.06	2664.2		Hbq1a	hemoglobin, theta 1A [Source:MGI Symbol;Acc:MGI:2685722]	142.756	66.6456	1.12192	6.62482e-05	0.00205282	124.323	147.845	137.436	161.419	55.7379	45.6971	102.216	62.9318		Tfrc	transferrin receptor [Source:MGI Symbol;Acc:MGI:98822]
Spon1	spondin 1, (f-spondin) extracellular matrix protein [Source:MGI Symbol;Acc:MGI:2385287]	-1.16649	121.004	271.35	3.91588e-09	1.37935e-07	121.086	120.613	126.465	115.85	260.438	329.55	197.204	298.206		Gm42047	predicted gene, 42047 [Source:MGI Symbol;Acc:MGI:5624932]	959.761	4211.91	-2.13412	1.41055e-45	7.3782e-44	802.64	1260.19	866.726	909.483	4030.08	4764.6	3961.41	4091.56		S100b	S100 protein, beta polypeptide, neural [Source:MGI Symbol;Acc:MGI:98217]	44.0681	9.37746	2.19724	6.85048e-05	0.00211167	57.9038	66.0375	20.6603	31.6707	15.4351	5.48365	4.79136	11.7997		Map3k5	mitogen-activated protein kinase kinase kinase 5 [Source:MGI Symbol;Acc:MGI:1346876]
Gm51802	predicted gene, 51802 [Source:NCBI gene (formerly Entrezgene);Acc:115487453]	2.58572	69.0968	11.6233	4.05932e-09	1.4276e-07	98.9749	54.6365	51.64	71.136	5.60943	13.6956	18.3195	8.86859		Rnf149	ring finger protein 149 [Source:MGI Symbol;Acc:MGI:2677438]	609.444	3653.62	-2.58238	1.65533e-45	8.64091e-44	826.466	524.095	610.124	477.09	4488.79	3539.61	3033.84	3552.26		Duxbl1	double homeobox B-like 1 [Source:MGI Symbol;Acc:MGI:1916048]	36.6892	10.9681	1.74298	7.11211e-05	0.00217235	54.4977	26.6121	27.8465	37.8006	13.7201	9.13942	11.1798	9.8331		Troap	trophinin associated protein [Source:MGI Symbol;Acc:MGI:1925983]
Gm45745	predicted gene 45745 [Source:MGI Symbol;Acc:MGI:5804860]	2.42436	70.8847	13.0792	4.10028e-09	1.43744e-07	66.3342	89.6863	42.1551	85.3632	16.0269	14.5516	15.0867	6.65144		Adgre1	adhesion G protein-coupled receptor E1 [Source:MGI Symbol;Acc:MGI:106912]	1456.07	10879.8	-2.90147	1.76692e-45	9.20459e-44	1398.29	1369.38	1848.83	1207.79	15104.6	12123.4	8570.07	7721.32		Dnase1l3	deoxyribonuclease 1-like 3 [Source:MGI Symbol;Acc:MGI:1314633]	223.547	572.117	-1.3575	7.36577e-05	0.00224271	270.785	216.84	201.214	205.349	528.223	937.704	257.137	565.403		Clic4	chloride intracellular channel 4 (mitochondrial) [Source:MGI Symbol;Acc:MGI:1352754]
Gbp3	guanylate binding protein 3 [Source:MGI Symbol;Acc:MGI:1926263]	-2.51811	922.852	5286.28	4.19799e-09	1.46936e-07	708.618	635.02	1714.66	633.11	3629.3	6508.83	4092.8	6914.18		Podnl1	podocan-like 1 [Source:MGI Symbol;Acc:MGI:2685352]	119.025	1378.94	-3.53886	1.80567e-45	9.38726e-44	62.5434	115.556	153.223	144.779	1441.65	1299.84	1037.98	1736.3		Ltbp2	latent transforming growth factor beta binding protein 2 [Source:MGI Symbol;Acc:MGI:99502]	303.635	106.756	1.49981	7.49659e-05	0.00227786	348.274	236.552	264.991	364.724	190.366	62.148	57.4964	117.014		Bin2	bridging integrator 2 [Source:MGI Symbol;Acc:MGI:3611448]
Havcr2	hepatitis A virus cellular receptor 2 [Source:MGI Symbol;Acc:MGI:2159682]	-1.36359	87.4546	225.058	4.40259e-09	1.53854e-07	95.8161	83.501	79.0408	91.4606	189.118	275.624	160.565	274.926		Kcnb1	potassium voltage gated channel, Shab-related subfamily, member 1 [Source:MGI Symbol;Acc:MGI:96666]	2143.05	653.94	1.71228	1.94997e-45	1.01169e-43	2288.79	2322.03	2049.13	1912.25	583.917	628.456	734.918	668.471		Ltk	leukocyte tyrosine kinase [Source:MGI Symbol;Acc:MGI:96840]	38.2028	8.54479	2.24163	7.64276e-05	0.00231606	32.358	58.1525	22.4569	39.8438	6.00254	2.74183	17.5683	7.86648		Treml2	triggering receptor expressed on myeloid cells-like 2 [Source:MGI Symbol;Acc:MGI:2147038]
Tgtp2	T cell specific GTPase 2 [Source:MGI Symbol;Acc:MGI:3710083]	-2.71178	449.214	2942.74	4.4149e-09	1.54041e-07	307.454	297.923	923.196	268.284	2633.23	3483.81	2270.55	3383.37		Lgmn	legumain [Source:MGI Symbol;Acc:MGI:1330838]	4294.05	17122	-1.99538	2.472e-45	1.27992e-43	4381.02	4228.25	4781.3	3785.63	20849	18468.5	15398.6	13772		E230016K23Rik	RIKEN cDNA E230016K23 gene [Source:MGI Symbol;Acc:MGI:3041204]	42.3529	8.32139	2.27226	7.691e-05	0.00232701	39.1702	64.0663	31.4396	34.7357	15.4351	10.9673	0	6.88317		Gm37691	predicted gene, 37691 [Source:MGI Symbol;Acc:MGI:5610919]
Irgm1	immunity-related GTPase family M member 1 [Source:MGI Symbol;Acc:MGI:107567]	-2.02753	2032.98	8288.5	4.43604e-09	1.54535e-07	1792.08	1581.37	3057.3	1701.17	6153.54	10448	5584.23	10968.2		S100b	S100 protein, beta polypeptide, neural [Source:MGI Symbol;Acc:MGI:98217]	1619.45	508.733	1.67023	2.82899e-45	1.4618e-43	1675.27	1524.06	1732.53	1545.93	449.347	547.01	556.33	482.246		Polm	polymerase (DNA directed), mu [Source:MGI Symbol;Acc:MGI:1860191]	681.473	265.23	1.35605	7.71487e-05	0.00233057	665.893	738.24	663.825	657.934	356.722	332.675	94.2302	277.293		Scarb1	scavenger receptor class B, member 1 [Source:MGI Symbol;Acc:MGI:893578]
Gm17767	predicted gene, 17767 [Source:MGI Symbol;Acc:MGI:5009931]	-2.2381	13.7655	65.1656	4.57626e-09	1.58919e-07	12.6351	16.494	14.7543	11.1785	46.4781	59.9182	71.1229	83.1431		Rap1b	RAS related protein 1b [Source:MGI Symbol;Acc:MGI:894315]	4288.55	11389.1	-1.40905	3.61492e-45	1.86413e-43	4273.8	4349.26	4372.4	4158.75	12522	12138.8	9826.69	11069.1		Pgr	progesterone receptor [Source:MGI Symbol;Acc:MGI:97567]	16.0381	1.59176	3.20836	8.3022e-05	0.00246166	13.6244	7.88508	24.2534	18.3895	2.57252	1.82788	0	1.96662		Map4k4	mitogen-activated protein kinase kinase kinase kinase 4 [Source:MGI Symbol;Acc:MGI:1349394]
Mafa	v-maf musculoaponeurotic fibrosarcoma oncogene family, protein A (avian) [Source:MGI Symbol;Acc:MGI:2673307]	-2.33455	18.7287	94.4569	4.6515e-09	1.60775e-07	21.0585	10.3088	24.2392	19.3083	72.9225	114.7	54.9586	135.246		Rasal3	RAS protein activator like 3 [Source:MGI Symbol;Acc:MGI:2444128]	560.797	2513.32	-2.16527	3.68263e-45	1.89522e-43	431.103	592.337	602.739	617.01	2559.17	2988.19	2154.97	2350.95		Igkv16-104	immunoglobulin kappa variable 16-104 [Source:MGI Symbol;Acc:MGI:2685913]	66.6606	352.035	-2.40228	8.4779e-05	0.0024945	36.6156	11.8276	122.165	96.0339	577.101	297.031	110.201	423.807		Rabep2	rabaptin, RAB GTPase binding effector protein 2 [Source:MGI Symbol;Acc:MGI:1917564]
Itih2	inter-alpha trypsin inhibitor, heavy chain 2 [Source:MGI Symbol;Acc:MGI:96619]	-2.5587	18.4042	108.63	4.67681e-09	1.61397e-07	27.376	22.6793	5.26938	18.2921	64.9091	121.548	86.2096	161.852		Rap2b	RAP2B, member of RAS oncogene family [Source:MGI Symbol;Acc:MGI:1921262]	178.421	1039.99	-2.54395	3.92549e-45	2.01614e-43	154.125	212.004	190.144	157.411	1303.57	1069.81	928.659	857.925		Plekha2	pleckstrin homology domain-containing, family A (phosphoinositide binding specific) member 2 [Source:MGI Symbol;Acc:MGI:1928144]	2120.57	957.33	1.14561	8.60509e-05	0.0025242	1932.11	2125.03	2280.72	2144.42	1291.4	1140.6	450.388	946.927		Ptdss2	phosphatidylserine synthase 2 [Source:MGI Symbol;Acc:MGI:1351664]
Gfpt2	glutamine fructose-6-phosphate transaminase 2 [Source:MGI Symbol;Acc:MGI:1338883]	-2.44468	52.7327	287.26	4.75745e-09	1.63925e-07	82.1281	45.3586	31.6163	51.8276	113.791	364.645	157.333	513.27		Apol7e	apolipoprotein L 7e [Source:MGI Symbol;Acc:MGI:3704456]	27.5862	470.135	-4.09281	3.97727e-45	2.03498e-43	23.0815	22.7472	47.9976	16.5184	534.769	506.287	368	471.482		Sdc4	syndecan 4 [Source:MGI Symbol;Acc:MGI:1349164]	776.925	380.499	1.03504	9.20501e-05	0.00266364	715.282	912.698	741.077	738.644	247.819	345.47	584.546	344.158		Nckap5l	NCK-associated protein 5-like [Source:MGI Symbol;Acc:MGI:3609653]
Got1	glutamic-oxaloacetic transaminase 1, soluble [Source:MGI Symbol;Acc:MGI:95791]	-1.10066	701.334	1504.15	4.83442e-09	1.66134e-07	619.12	632.959	951.651	601.607	1190	1728.21	1237.11	1861.3		Thbd	thrombomodulin [Source:MGI Symbol;Acc:MGI:98736]	9594.36	2668.48	1.8462	3.98051e-45	2.03498e-43	8902.75	10108.9	11424.4	7941.46	2832.99	2708.63	2331.39	2800.9		Mapk12	mitogen-activated protein kinase 12 [Source:MGI Symbol;Acc:MGI:1353438]	53.1002	13.4969	1.94784	9.2324e-05	0.00266755	71.5282	73.9226	33.2362	33.714	24.0102	8.22548	7.98561	13.7663		Sp100	nuclear antigen Sp100 [Source:MGI Symbol;Acc:MGI:109561]
Hpgds	hematopoietic prostaglandin D synthase [Source:MGI Symbol;Acc:MGI:1859384]	-1.3715	166.319	430.392	4.8441e-09	1.66134e-07	184.262	140.199	209.722	131.093	319.737	511.016	325.441	565.373		Ccdc86	coiled-coil domain containing 86 [Source:MGI Symbol;Acc:MGI:1277220]	252.357	901.509	-1.83818	3.98608e-45	2.03498e-43	241.983	222.013	251.987	293.444	929.118	894.807	898.353	883.759		1810046K07Rik	RIKEN cDNA 1810046K07 gene [Source:MGI Symbol;Acc:MGI:1917059]	7.34379	0	5.24109	9.34516e-05	0.00269609	5.10915	7.88508	7.1862	9.19473	0	0	0	0		Cracd	capping protein inhibiting regulator of actin [Source:MGI Symbol;Acc:MGI:2444817]
Zfp366	zinc finger protein 366 [Source:MGI Symbol;Acc:MGI:2178429]	-1.5411	53.8628	156.831	4.93489e-09	1.68725e-07	45.2757	43.2968	81.1485	45.7303	129.818	160.923	169.186	167.395		Fam102b	family with sequence similarity 102, member B [Source:MGI Symbol;Acc:MGI:3036259]	572.256	3033.74	-2.40626	4.22566e-45	2.15298e-43	536.831	655.119	625.815	471.26	4007.84	2910.05	2477.51	2739.55		Mcoln3	mucolipin 3 [Source:MGI Symbol;Acc:MGI:1890500]	16.9945	1.40883	3.49433	0.000100664	0.00287827	15.3275	20.6983	5.38965	26.5626	0.857506	1.82788	0	2.94993		Sgk1	serum/glucocorticoid regulated kinase 1 [Source:MGI Symbol;Acc:MGI:1340062]
Tnfrsf4	tumor necrosis factor receptor superfamily, member 4 [Source:MGI Symbol;Acc:MGI:104512]	-1.35742	72.9228	187.187	5.29885e-09	1.8061e-07	85.2869	65.9761	62.1787	78.2496	160.269	176.331	162.721	249.429		Cyth4	cytohesin 4 [Source:MGI Symbol;Acc:MGI:2441702]	1938.9	7437.25	-1.93974	4.89952e-45	2.49134e-43	1673.78	2132.78	2025.13	1923.91	7800.38	8988.79	6803.67	6156.17		Csf3r	colony stimulating factor 3 receptor (granulocyte) [Source:MGI Symbol;Acc:MGI:1339755]	5255.99	2619.59	1.00404	0.000100977	0.00288294	4707.23	6687.53	4729.42	4899.77	3810.75	2368.02	1710.52	2589.06		Ubac1	ubiquitin associated domain containing 1 [Source:MGI Symbol;Acc:MGI:1920995]
Tgm3	transglutaminase 3, E polypeptide [Source:MGI Symbol;Acc:MGI:98732]	2.16762	82.9887	18.3021	6.19379e-09	2.09821e-07	84.234	91.7481	70.6098	85.3632	31.2525	10.2717	16.1643	15.52		Prtn3	proteinase 3 [Source:MGI Symbol;Acc:MGI:893580]	275.371	1472.01	-2.41871	5.37787e-45	2.72796e-43	268.788	315.731	220.604	296.359	1195.92	1811.63	1561.84	1318.64		Gvin-ps2	GTPase, very large interferon inducible, pseudogene 2 [Source:MGI Symbol;Acc:MGI:5011037]	2.61508	23.6477	-3.2056	0.000102503	0.00292218	2.55458	3.94254	0.898275	3.06491	23.1526	46.611	3.19424	21.6328		Sigirr	single immunoglobulin and toll-interleukin 1 receptor (TIR) domain [Source:MGI Symbol;Acc:MGI:1344402]
Klri2	killer cell lectin-like receptor family I member 2 [Source:MGI Symbol;Acc:MGI:2443965]	2.26554	106.44	21.9753	6.21454e-09	2.10202e-07	164.256	76.2849	92.7412	92.4768	36.0606	14.5516	14.0091	23.2801		AI662270	expressed sequence AI662270 [Source:MGI Symbol;Acc:MGI:2144254]	216.977	1339.33	-2.62858	5.38623e-45	2.72796e-43	161.57	201.085	239.988	265.266	1374.95	1656.44	1136.47	1189.47		Gvin-ps4	GTPase, very large interferon inducible, pseudogene 4 [Source:MGI Symbol;Acc:MGI:5011038]	0.673706	26.4558	-5.27031	0.000104724	0.00297227	0	0	2.69482	0	37.7302	35.6437	0	32.4492		Ezr	ezrin [Source:MGI Symbol;Acc:MGI:98931]
Ch25h	cholesterol 25-hydroxylase [Source:MGI Symbol;Acc:MGI:1333869]	-5.77157	0.790408	42.6458	6.33833e-09	2.13767e-07	0	0	3.16163	0	30.4512	59.9182	24.7853	55.4287		Nfkbie	nuclear factor of kappa light polypeptide gene enhancer in B cells inhibitor, epsilon [Source:MGI Symbol;Acc:MGI:1194908]	400.626	2200.24	-2.45804	5.57633e-45	2.81864e-43	390.152	272.966	409.826	529.56	2309.92	2097.79	2220.99	2172.26		Kcna2	potassium voltage-gated channel, shaker-related subfamily, member 2 [Source:MGI Symbol;Acc:MGI:96659]	68.7865	168.852	-1.28827	0.00010693	0.00302151	77.4888	56.1812	48.5068	92.969	127.768	141.661	268.316	137.663		Fbxo32	F-box protein 32 [Source:MGI Symbol;Acc:MGI:1914981]
Gm12057	predicted gene 12057 [Source:MGI Symbol;Acc:MGI:3650030]	2.8481	92.6981	12.853	6.33928e-09	2.13767e-07	98.9749	108.242	27.4008	136.175	15.2256	11.9836	6.46572	17.7372		Capza2	capping protein (actin filament) muscle Z-line, alpha 2 [Source:MGI Symbol;Acc:MGI:106222]	3173.84	8460.37	-1.41456	5.83058e-45	2.94133e-43	3082.5	3034.48	3149.38	3429.02	9247.88	8887.54	7431.44	8274.61		Ccl12	chemokine (C-C motif) ligand 12 [Source:MGI Symbol;Acc:MGI:108224]	1.61144	14.1519	-3.1072	0.000111071	0.00312476	2.55458	1.97127	0.898275	1.02164	11.1476	8.22548	17.5683	19.6662		Elf4	E74-like factor 4 (ets domain transcription factor) [Source:MGI Symbol;Acc:MGI:1928377]
Siglec1	sialic acid binding Ig-like lectin 1, sialoadhesin [Source:MGI Symbol;Acc:MGI:99668]	-1.16511	357.197	801.038	6.54108e-09	2.20236e-07	362.206	370.085	351.995	344.501	584.983	1075.1	585.148	958.917		Ifi213	interferon activated gene 213 [Source:MGI Symbol;Acc:MGI:3695276]	489.158	2406.1	-2.29992	5.89725e-45	2.9691e-43	378.239	479.511	480.899	617.982	2001	2438.98	2415.81	2768.61		Dmrt3	doublesex and mab-3 related transcription factor 3 [Source:MGI Symbol;Acc:MGI:2449470]	10.0873	0	5.70159	0.000111365	0.00312847	15.3275	10.842	0.898275	13.2813	0	0	0	0		Samd14	sterile alpha motif domain containing 14 [Source:MGI Symbol;Acc:MGI:2384945]
Trim7	tripartite motif-containing 7 [Source:MGI Symbol;Acc:MGI:2137353]	1.98261	156.267	39.5341	6.9415e-09	2.32656e-07	183.209	165.971	70.6098	205.278	32.8552	47.9345	47.4153	29.9315		Stx11	syntaxin 11 [Source:MGI Symbol;Acc:MGI:1921982]	337.076	1549.85	-2.20302	5.99626e-45	3.013e-43	265.809	366.685	300.908	414.903	1633.56	1674.05	1463.34	1428.44		Igkv6-23	immunoglobulin kappa variable 6-23 [Source:MGI Symbol;Acc:MGI:3711980]	48.1114	498.978	-3.37608	0.000113187	0.0031704	26.3973	90.6784	31.4396	43.9304	981.844	363.749	36.7338	613.585		Nid1	nidogen 1 [Source:MGI Symbol;Acc:MGI:97342]
Asb5	ankyrin repeat and SOCs box-containing 5 [Source:MGI Symbol;Acc:MGI:1923544]	-3.2898	10.4495	102.056	7.11316e-09	2.38049e-07	15.7939	10.3088	12.6465	3.04869	32.8552	172.907	52.8034	149.657		Prickle2	prickle planar cell polarity protein 2 [Source:MGI Symbol;Acc:MGI:1925144]	1880.46	516.313	1.86425	6.73234e-45	3.37622e-43	1916.51	1949.89	1806.37	1849.09	431.794	542.607	469.741	621.107		Gml2	glycosylphosphatidylinositol anchored molecule like 2 [Source:MGI Symbol;Acc:MGI:1341831]	2.7609	18.9621	-2.74908	0.00011437	0.00319888	5.10915	1.97127	0.898275	3.06491	9.43256	21.9346	28.7482	15.733		Tcam1	testicular cell adhesion molecule 1 [Source:MGI Symbol;Acc:MGI:1923120]
Ppp1r1a	protein phosphatase 1, regulatory inhibitor subunit 1A [Source:MGI Symbol;Acc:MGI:1889595]	-4.4941	30.2818	682.216	7.40342e-09	2.46643e-07	52.6462	14.4323	33.7241	20.3246	171.488	1131.6	226.3	1199.48		Tnip3	TNFAIP3 interacting protein 3 [Source:MGI Symbol;Acc:MGI:3041165]	53.7074	943.099	-4.13633	7.38915e-45	3.69834e-43	38.7173	50.0438	96.9183	29.1501	1180.71	944.335	861.553	785.803		Dysf	dysferlin [Source:MGI Symbol;Acc:MGI:1349385]	46.1094	117.144	-1.3555	0.000116934	0.00326584	40.0217	70.9657	30.5413	42.9088	134.628	153.542	70.2733	110.131		Ppid	peptidylprolyl isomerase D (cyclophilin D) [Source:MGI Symbol;Acc:MGI:1914988]
Fstl1	follistatin-like 1 [Source:MGI Symbol;Acc:MGI:102793]	-1.23793	674.378	1590.82	7.70262e-09	2.5584e-07	833.916	684.502	604.925	574.169	1188.4	1817.23	1088.4	2269.25		Snx5	sorting nexin 5 [Source:MGI Symbol;Acc:MGI:1916428]	2619.63	7275.12	-1.47365	8.19925e-45	4.09577e-43	2522.58	2424.85	2906.63	2624.48	8191.22	7194.78	6615.34	7099.14		Mt1	metallothionein 1 [Source:MGI Symbol;Acc:MGI:97171]	976.446	2742.14	-1.48904	0.000122305	0.00341088	1018.42	923.54	972.832	990.988	1189.36	2091.1	5484.51	2203.6		Tmem9	transmembrane protein 9 [Source:MGI Symbol;Acc:MGI:1913491]
Stra6	stimulated by retinoic acid gene 6 [Source:MGI Symbol;Acc:MGI:107742]	-3.09535	12.6424	108.291	7.76852e-09	2.57007e-07	15.7939	5.15439	4.21551	25.4057	56.8956	146.372	62.502	167.395		Nmi	N-myc (and STAT) interactor [Source:MGI Symbol;Acc:MGI:1928368]	370.632	1254.12	-1.75945	8.29705e-45	4.13654e-43	352.179	333.019	395.057	402.271	1269.64	1328.45	1311.81	1106.58		Gm19951	predicted gene, 19951 [Source:MGI Symbol;Acc:MGI:5012136]	81.0612	22.2074	1.86107	0.000122856	0.00341505	92.8163	140.946	40.4224	50.0602	12.8626	33.8159	17.5683	24.5827		Tsc22d3	TSC22 domain family, member 3 [Source:MGI Symbol;Acc:MGI:1196284]
Samd3	sterile alpha motif domain containing 3 [Source:MGI Symbol;Acc:MGI:2685469]	1.80993	128.278	36.5223	7.92008e-09	2.61493e-07	164.256	105.149	137.004	106.704	33.6566	45.3666	19.3972	47.6687		Prkcd	protein kinase C, delta [Source:MGI Symbol;Acc:MGI:97598]	3843.01	9514.97	-1.30825	1.0008e-44	4.97981e-43	3363.2	3861.56	3986.57	4160.69	9630.53	9793.35	9382.92	9253.1		Gpnmb	glycoprotein (transmembrane) nmb [Source:MGI Symbol;Acc:MGI:1934765]	109.441	32.8188	1.71965	0.000122873	0.00341505	134.541	42.3823	146.419	114.423	41.1603	46.611	15.9712	27.5327		Il21r	interleukin 21 receptor [Source:MGI Symbol;Acc:MGI:1890475]
Pik3c2b	phosphatidylinositol-4-phosphate 3-kinase catalytic subunit type 2 beta [Source:MGI Symbol;Acc:MGI:2685045]	1.17222	887.493	393.877	7.9324e-09	2.61509e-07	869.716	1110.25	538.531	1031.47	429.522	337.254	442.902	365.829		Gbp9	guanylate-binding protein 9 [Source:MGI Symbol;Acc:MGI:3605620]	2360.29	7866.75	-1.737	1.27431e-44	6.32839e-43	2233.69	1970.82	2612.18	2624.48	7379.12	7133.14	8615.53	8339.2		Gcg	glucagon [Source:MGI Symbol;Acc:MGI:95674]	0	8.01719	-5.55993	0.000125856	0.00348466	0	0	0	0	6.86004	12.7952	1.59712	10.8164		Top2a	topoisomerase (DNA) II alpha [Source:MGI Symbol;Acc:MGI:98790]
Ninj1	ninjurin 1 [Source:MGI Symbol;Acc:MGI:1196617]	-1.29553	1041.03	2555.68	8.18408e-09	2.69004e-07	988.696	1022.63	1092.87	1059.93	1615.51	3226.17	1697.25	3683.79		Tpm3	tropomyosin 3, gamma [Source:MGI Symbol;Acc:MGI:1890149]	6821.66	16238.9	-1.25129	1.2856e-44	6.3721e-43	6530.57	6662.2	7139.65	6954.24	17664.9	16947.4	15082.6	15260.7		Grap2	GRB2-related adaptor protein 2 [Source:MGI Symbol;Acc:MGI:1333842]	2087.48	811.359	1.36171	0.000126993	0.00350819	2359.58	1649.95	2183.71	2156.68	1285.4	836.257	306.647	817.131		Themis	thymocyte selection associated [Source:MGI Symbol;Acc:MGI:2443552]
Mybpc2	myosin binding protein C, fast-type [Source:MGI Symbol;Acc:MGI:1336170]	-4.4	174.628	3686.78	8.47103e-09	2.76506e-07	263.231	126.798	129.627	178.856	750.06	6030.34	1101.33	6865.4		Treml4	triggering receptor expressed on myeloid cells-like 4 [Source:MGI Symbol;Acc:MGI:1923239]	49.2045	600.47	-3.60358	1.52392e-44	7.5387e-43	65.5217	51.8636	23.0758	56.3569	658.808	534.903	664.565	543.603		A330094K24Rik	RIKEN cDNA A330094K24 gene [Source:MGI Symbol;Acc:MGI:1924343]	33.7479	6.03528	2.42044	0.00012707	0.00350819	17.0305	21.684	50.3034	45.9737	12.0051	3.65577	1.59712	6.88317		Cdc25c	cell division cycle 25C [Source:MGI Symbol;Acc:MGI:88350]
Sfrp1	secreted frizzled-related protein 1 [Source:MGI Symbol;Acc:MGI:892014]	-1.89166	73.3334	272.214	8.49162e-09	2.76647e-07	70.5459	40.2042	104.334	78.2496	167.481	338.11	187.506	395.761		Procr	protein C receptor, endothelial [Source:MGI Symbol;Acc:MGI:104596]	425.727	2634.34	-2.63021	1.60847e-44	7.94153e-43	379.728	393.071	364.597	565.512	3510.52	2481.91	2204.75	2340.19		Sardh	sarcosine dehydrogenase [Source:MGI Symbol;Acc:MGI:2183102]	116.357	56.3149	1.04896	0.000127559	0.00351663	165.196	90.6784	103.302	106.25	60.0254	49.3529	55.8992	59.9819		Gatm	glycine amidinotransferase (L-arginine:glycine amidinotransferase) [Source:MGI Symbol;Acc:MGI:1914342]
F730043M19Rik	RIKEN cDNA F730043M19 gene [Source:MGI Symbol;Acc:MGI:2443237]	-1.67911	43.3712	139.029	8.64857e-09	2.8052e-07	49.4874	32.9881	44.2628	46.7465	109.784	153.219	100.219	192.892		Tpx2	TPX2, microtubule-associated [Source:MGI Symbol;Acc:MGI:1919369]	273.799	1408.96	-2.36462	1.6689e-44	8.224e-43	236.771	276.606	280.601	301.218	1617.18	1570.59	1424.38	1023.7		Apbb1	amyloid beta (A4) precursor protein-binding, family B, member 1 [Source:MGI Symbol;Acc:MGI:107765]	67.5506	24.453	1.46269	0.000128201	0.00352928	38.3187	73.9226	77.2516	80.7093	35.1577	16.451	25.5539	20.6495		Pnrc1	proline-rich nuclear receptor coactivator 1 [Source:MGI Symbol;Acc:MGI:1917838]
Clic5	chloride intracellular channel 5 [Source:MGI Symbol;Acc:MGI:1917912]	-2.22095	66.7413	311.278	8.66444e-09	2.80624e-07	98.9749	48.4512	46.3706	73.1684	165.077	409.156	147.634	523.247		Ipcef1	interaction protein for cytohesin exchange factors 1 [Source:MGI Symbol;Acc:MGI:2444159]	183.292	1090.97	-2.57203	1.92923e-44	9.48854e-43	197.31	161.05	226.143	148.665	1208.79	1292.13	917.836	945.116		Clcn2	chloride channel, voltage-sensitive 2 [Source:MGI Symbol;Acc:MGI:105061]	288.316	669.611	-1.2172	0.000132432	0.00364055	348.274	257.251	266.788	280.95	571.956	1047.38	335.395	723.716		Pik3cd	phosphatidylinositol-4,5-bisphosphate 3-kinase catalytic subunit delta [Source:MGI Symbol;Acc:MGI:1098211]
S1pr1	sphingosine-1-phosphate receptor 1 [Source:MGI Symbol;Acc:MGI:1096355]	1.16859	770.389	342.691	8.97554e-09	2.89851e-07	922.362	808.208	552.232	798.756	276.465	439.971	260.784	393.544		Ms4a4a	membrane-spanning 4-domains, subfamily A, member 4A [Source:MGI Symbol;Acc:MGI:3643932]	191.471	1739.24	-3.18351	1.97822e-44	9.71078e-43	169.016	201.995	251.064	143.807	2153.12	1270.12	1335.62	2198.1		Arl4d	ADP-ribosylation factor-like 4D [Source:MGI Symbol;Acc:MGI:1933155]	92.9845	46.1031	1.02094	0.000135139	0.00370507	106.441	88.7071	88.9292	87.8608	42.0178	32.9019	49.5108	59.9819		St7	suppression of tumorigenicity 7 [Source:MGI Symbol;Acc:MGI:1927450]
9330175E14Rik	RIKEN cDNA 9330175E14 gene [Source:MGI Symbol;Acc:MGI:2443913]	-1.17043	193.672	435.89	9.08906e-09	2.93089e-07	147.409	195.867	242.392	189.018	371.825	528.992	339.45	503.293		Oas1a	2'-5' oligoadenylate synthetase 1A [Source:MGI Symbol;Acc:MGI:2180860]	320.275	2004.75	-2.64773	2.04172e-44	1.00033e-42	230.07	284.795	431.979	334.254	2105.14	2092.29	2204.75	1616.82		Igkv9-123	immunoglobulin kappa variable 9-123 [Source:MGI Symbol;Acc:MGI:3643848]	21.3459	1.07188	4.16293	0.0001422	0.00388135	44.2793	8.87071	10.7793	21.4544	4.28753	0	0	0		Dhrs11	dehydrogenase/reductase (SDR family) member 11 [Source:MGI Symbol;Acc:MGI:2652816]
Unc45b	unc-45 myosin chaperone B [Source:MGI Symbol;Acc:MGI:2443377]	-2.59764	35.3545	214.114	9.512e-09	3.06281e-07	46.3287	38.1425	29.5086	27.4382	69.7172	303.015	102.374	381.349		Arpc2	actin related protein 2/3 complex, subunit 2 [Source:MGI Symbol;Acc:MGI:1923959]	5100.1	14856.1	-1.54245	2.22668e-44	1.08885e-42	4929.02	5209.11	5412.65	4849.6	16938.3	15945.8	13344.3	13196.1		Fbln1	fibulin 1 [Source:MGI Symbol;Acc:MGI:95487]	98.111	31.1253	1.6248	0.000142813	0.00388157	103.886	83.779	93.4206	111.358	46.3053	46.611	7.98561	23.5994		Hip1r	huntingtin interacting protein 1 related [Source:MGI Symbol;Acc:MGI:1352504]
Gm10134	predicted gene 10134 [Source:MGI Symbol;Acc:MGI:3642322]	-3.93191	22.1633	338.182	9.55955e-09	3.07365e-07	13.688	7.21614	47.4245	20.3246	161.872	409.156	187.506	594.196		Afap1l1	actin filament associated protein 1-like 1 [Source:MGI Symbol;Acc:MGI:2147199]	1916.48	638.95	1.58502	2.44648e-44	1.19405e-42	2002.13	1871.64	2088.82	1703.34	668.169	616.349	592.047	679.235		E330020D12Rik	Riken cDNA E330020D12 gene [Source:MGI Symbol;Acc:MGI:3761270]	177.508	80.2514	1.13413	0.000151015	0.00408717	165.196	251.337	139.233	154.267	84.893	75.8572	51.1079	109.147		Tipin	timeless interacting protein [Source:MGI Symbol;Acc:MGI:1921571]
Il12rb1	interleukin 12 receptor, beta 1 [Source:MGI Symbol;Acc:MGI:104579]	-2.87829	100.51	738.865	9.90622e-09	3.17588e-07	64.2284	53.6056	218.153	66.0548	601.811	878.229	620.709	854.711		Psap	prosaposin [Source:MGI Symbol;Acc:MGI:97783]	51386.9	169532	-1.72208	2.70016e-44	1.31535e-42	52941.5	49847.3	54808.7	47950	202081	180113	154787	141146		Igkv6-15	immunoglobulin kappa variable 6-15 [Source:MGI Symbol;Acc:MGI:1330831]	58.1574	770.216	-3.72782	0.000152689	0.00412667	22.1397	63.0806	87.1327	60.2766	463.053	1709.99	28.7482	879.079		Wipf1	WAS/WASL interacting protein family, member 1 [Source:MGI Symbol;Acc:MGI:2178801]
Ccn2	cellular communication network factor 2 [Source:MGI Symbol;Acc:MGI:95537]	-1.46289	135.279	373.154	1.00092e-08	3.19962e-07	118.98	147.415	123.304	151.418	244.411	481.913	260.784	505.51		Ptpn18	protein tyrosine phosphatase, non-receptor type 18 [Source:MGI Symbol;Acc:MGI:108410]	172.861	766.355	-2.14921	2.83307e-44	1.37747e-42	172.739	154.681	172.607	191.419	672.85	786.946	710.024	895.6		Tmem108	transmembrane protein 108 [Source:MGI Symbol;Acc:MGI:1932411]	99.8911	38.6891	1.39942	0.000156247	0.00419924	76.6373	101.52	98.8102	122.596	33.4427	31.988	68.6762	20.6495		Ptpn6	protein tyrosine phosphatase, non-receptor type 6 [Source:MGI Symbol;Acc:MGI:96055]
Cacng1	calcium channel, voltage-dependent, gamma subunit 1 [Source:MGI Symbol;Acc:MGI:1206582]	-5.18394	26.7288	971.218	1.01847e-08	3.25103e-07	47.3816	7.21614	42.1551	10.1623	237.199	1553.59	309.277	1784.8		Ttc39c	tetratricopeptide repeat domain 39C [Source:MGI Symbol;Acc:MGI:1919997]	226.73	860.608	-1.92452	3.31503e-44	1.60874e-42	222.625	223.832	223.374	237.087	985.286	876.096	743.577	837.472		Flt4	FMS-like tyrosine kinase 4 [Source:MGI Symbol;Acc:MGI:95561]	100.819	214.797	-1.09568	0.00016106	0.00431654	120.065	71.9513	113.183	98.0772	286.407	233.969	129.367	209.445		Memo1	mediator of cell motility 1 [Source:MGI Symbol;Acc:MGI:1924140]
Ms4a6d	membrane-spanning 4-domains, subfamily A, member 6D [Source:MGI Symbol;Acc:MGI:1916024]	-2.57395	329.262	1960.43	1.0357e-08	3.30125e-07	312.719	203.083	610.195	191.051	1248.5	2438.67	1711.26	2443.3		Gpr18	G protein-coupled receptor 18 [Source:MGI Symbol;Acc:MGI:107859]	31.0962	454.285	-3.852	3.50929e-44	1.69977e-42	50.6304	26.3867	23.0758	24.2917	554.662	475.469	417.788	369.22		Gm45552	predicted gene 45552 [Source:MGI Symbol;Acc:MGI:5791388]	54.0328	18.2747	1.53328	0.000161835	0.00433108	73.2312	48.2961	47.6086	46.9953	30.0127	20.1067	11.1798	11.7997		Rasgrp3	RAS, guanyl releasing protein 3 [Source:MGI Symbol;Acc:MGI:3028579]
Ifit3b	interferon-induced protein with tetratricopeptide repeats 3B [Source:MGI Symbol;Acc:MGI:3698419]	-1.85493	148.404	536.728	1.05752e-08	3.36596e-07	141.092	97.9333	225.53	129.061	388.653	741.273	255.396	761.59		Sash3	SAM and SH3 domain containing 3 [Source:MGI Symbol;Acc:MGI:1921381]	593.636	2717.01	-2.19529	4.27728e-44	2.06784e-42	472.054	619.633	640.584	642.274	3035.43	3183	2446.12	2203.48		Tlr5	toll-like receptor 5 [Source:MGI Symbol;Acc:MGI:1858171]	86.9669	29.2386	1.54038	0.000162767	0.00434161	87.7072	86.7359	105.996	67.428	50.5928	29.2461	9.58273	27.5327		Cenph	centromere protein H [Source:MGI Symbol;Acc:MGI:1349448]
Pld2	phospholipase D2 [Source:MGI Symbol;Acc:MGI:892877]	-1.12047	162.041	352.65	1.06033e-08	3.37004e-07	172.68	153.601	163.351	158.532	282.074	374.061	286.647	467.818		Mgst1	microsomal glutathione S-transferase 1 [Source:MGI Symbol;Acc:MGI:1913850]	526.223	2217.19	-2.07472	4.83482e-44	2.33296e-42	562.146	464.953	512.282	565.512	2435.13	1930.49	1846.49	2656.66		Plxna3	plexin A3 [Source:MGI Symbol;Acc:MGI:107683]	39.1775	12.97	1.59247	0.000162898	0.00434161	56.2007	41.3967	23.3551	35.7573	14.5776	13.7091	12.777	10.8164		Thop1	thimet oligopeptidase 1 [Source:MGI Symbol;Acc:MGI:1354165]
Strc	stereocilin [Source:MGI Symbol;Acc:MGI:2153816]	-3.32348	5.50843	54.8598	1.08818e-08	3.45362e-07	6.31755	4.12351	11.5926	0	52.0875	64.198	36.6391	66.5144		Sgpl1	sphingosine phosphate lyase 1 [Source:MGI Symbol;Acc:MGI:1261415]	1711.18	5659.41	-1.72587	5.42043e-44	2.6106e-42	1499.55	1928.96	1755.61	1660.58	6384.47	5918.05	5551.39	4783.71		Lmo7	LIM domain only 7 [Source:MGI Symbol;Acc:MGI:1353586]	48.5118	17.3003	1.43727	0.000168065	0.00446079	45.9824	43.3679	48.5068	56.19	24.8677	18.2788	6.38849	19.6662		Uros	uroporphyrinogen III synthase [Source:MGI Symbol;Acc:MGI:98917]
Gm35035	predicted gene, 35035 [Source:MGI Symbol;Acc:MGI:5594194]	2.78694	82.1165	11.6596	1.11769e-08	3.54217e-07	73.7047	86.5937	70.6098	97.5579	27.2458	5.13584	5.3881	8.86859		Cpe	carboxypeptidase E [Source:MGI Symbol;Acc:MGI:101932]	7535.07	2489.96	1.59761	5.87154e-44	2.82254e-42	7660.08	7347.34	8683.88	6448.97	2719.48	2292.6	2440.71	2507.03		Gfra4	glial cell line derived neurotrophic factor family receptor alpha 4 [Source:MGI Symbol;Acc:MGI:1341873]	29.1744	4.98131	2.48863	0.000168571	0.00446805	22.9912	22.6696	33.2362	37.8006	2.57252	4.56971	0	12.783		Rab3il1	RAB3A interacting protein (rabin3)-like 1 [Source:MGI Symbol;Acc:MGI:1922010]
Cd14	CD14 antigen [Source:MGI Symbol;Acc:MGI:88318]	-1.18747	235.804	536.93	1.12834e-08	3.57083e-07	267.443	173.187	328.81	173.775	478.404	571.791	577.604	519.921		Nr1h3	nuclear receptor subfamily 1, group H, member 3 [Source:MGI Symbol;Acc:MGI:1352462]	355.484	1664.94	-2.22714	5.98984e-44	2.874e-42	360.369	385.792	341.522	334.254	2045.46	1803.92	1534.78	1275.58		Fndc9	fibronectin type III domain containing 9 [Source:MGI Symbol;Acc:MGI:2443410]	129.487	42.4957	1.58258	0.000169344	0.00447231	141.353	124.19	118.572	133.834	70.3155	43.8692	9.58273	46.2156		Gins1	GINS complex subunit 1 (Psf1 homolog) [Source:MGI Symbol;Acc:MGI:1916520]
Basp1	brain abundant, membrane attached signal protein 1 [Source:MGI Symbol;Acc:MGI:1917600]	-1.13209	406.656	891.528	1.18371e-08	3.73537e-07	402.217	373.177	444.736	406.491	653.098	1071.68	656.271	1185.07		Dok2	docking protein 2 [Source:MGI Symbol;Acc:MGI:1332623]	250.025	1263.9	-2.33905	7.19183e-44	3.44425e-42	218.157	200.175	318.446	263.323	1392.51	1341.66	1097.51	1223.92		Gm3227	predicted gene 3227 [Source:MGI Symbol;Acc:MGI:3781405]	8.16772	0	5.39768	0.000170635	0.00449527	12.7729	7.88508	1.79655	10.2164	0	0	0	0		Slc16a1	solute carrier family 16 (monocarboxylic acid transporters), member 1 [Source:MGI Symbol;Acc:MGI:106013]
Cystm1	cysteine-rich transmembrane module containing 1 [Source:MGI Symbol;Acc:MGI:1913310]	-2.21459	74.8953	347.7	1.19257e-08	3.75794e-07	75.8106	67.007	92.7412	64.0224	144.242	516.152	159.488	570.916		Rack1	receptor for activated C kinase 1 [Source:MGI Symbol;Acc:MGI:101849]	6519.06	14750.8	-1.17811	7.44899e-44	3.56073e-42	6378.68	6318.26	6464.91	6914.4	14837.8	14822.1	13508.9	15834.5		Fam149a	family with sequence similarity 149, member A [Source:MGI Symbol;Acc:MGI:2387177]	11.6907	31.3882	-1.42744	0.000170766	0.00449527	11.0698	13.7989	11.6776	10.2164	33.4427	28.3322	30.3453	33.4325		Cd72	CD72 antigen [Source:MGI Symbol;Acc:MGI:88345]
Nos2	nitric oxide synthase 2, inducible [Source:MGI Symbol;Acc:MGI:97361]	-7.75826	5.78482	1250.91	1.20953e-08	3.80598e-07	0	2.06175	21.0775	0	911.131	1406.37	1077.62	1608.54		Arhgap11a	Rho GTPase activating protein 11A [Source:MGI Symbol;Acc:MGI:2444300]	412.688	1394.67	-1.75779	7.86688e-44	3.75346e-42	384.94	382.153	416.287	467.373	1410.06	1571.69	1281.51	1315.41		Aplnr	apelin receptor [Source:MGI Symbol;Acc:MGI:1346086]	90.5949	43.8892	1.0454	0.000172657	0.00453886	83.4495	96.5922	100.607	81.731	60.0254	33.8159	46.3165	35.3992		Rexo2	RNA exonuclease 2 [Source:MGI Symbol;Acc:MGI:1888981]
Rab13	RAB13, member RAS oncogene family [Source:MGI Symbol;Acc:MGI:1927232]	-1.27062	136.949	330.404	1.25155e-08	3.92147e-07	157.939	129.891	137.004	122.964	268.451	405.732	230.611	416.824		S100a11	S100 calcium binding protein A11 [Source:MGI Symbol;Acc:MGI:1338798]	2122.88	5646.4	-1.41115	1.14786e-43	5.46647e-42	2270.18	1830.69	2145.12	2245.53	5944.48	5444.79	5365.22	5831.09		Gm5535	predicted gene 5535 [Source:MGI Symbol;Acc:MGI:3645019]	0.224569	15.1517	-5.74786	0.000176486	0.00463318	0	0	0.898275	0	6.00254	31.988	0	22.6161		Tyms	thymidylate synthase [Source:MGI Symbol;Acc:MGI:98878]
Kcnk13	potassium channel, subfamily K, member 13 [Source:MGI Symbol;Acc:MGI:2384976]	-1.91857	36.1567	136.635	1.26777e-08	3.96667e-07	26.3231	40.2042	52.6938	25.4057	108.182	173.763	89.4425	175.155		Fau	Finkel-Biskis-Reilly murine sarcoma virus (FBR-MuSV) ubiquitously expressed (fox derived) [Source:MGI Symbol;Acc:MGI:102547]	3646.77	8873.05	-1.28276	1.21645e-43	5.78234e-42	3734.73	3634.09	3619.21	3599.07	8641.73	8978.89	7972.61	9898.96		Fam167a	family with sequence similarity 167, member A [Source:MGI Symbol;Acc:MGI:3606565]	35.6694	8.40236	2.04409	0.000177445	0.00465202	44.2793	13.7989	38.6258	45.9737	7.71755	11.8812	3.19424	10.8164		Cpne2	copine II [Source:MGI Symbol;Acc:MGI:2387578]
Tox	thymocyte selection-associated high mobility group box [Source:MGI Symbol;Acc:MGI:2181659]	-1.40323	66.5491	176.267	1.27128e-08	3.97203e-07	56.8579	52.5747	92.7412	64.0224	139.434	171.195	200.437	194		Trim30d	tripartite motif-containing 30D [Source:MGI Symbol;Acc:MGI:3035181]	389.148	1837.38	-2.2378	1.44086e-43	6.8363e-42	445.994	381.243	449.516	279.841	1907.38	1900.78	1942.82	1598.52		Ifi214	interferon activated gene 214 [Source:MGI Symbol;Acc:MGI:3584522]	81.2643	28.8909	1.52743	0.000184322	0.00479313	108.995	56.1812	78.1499	81.731	25.7252	12.7952	49.5108	27.5327		Urod	uroporphyrinogen decarboxylase [Source:MGI Symbol;Acc:MGI:98916]
Cd209d	CD209d antigen [Source:MGI Symbol;Acc:MGI:2157947]	2.88098	54.593	7.67117	1.27515e-08	3.97851e-07	62.1225	43.2968	61.1249	51.8276	4.00673	2.56792	9.69858	14.4115		Ms4a7	membrane-spanning 4-domains, subfamily A, member 7 [Source:MGI Symbol;Acc:MGI:1918846]	393.559	2860.41	-2.86261	2.44465e-43	1.15774e-41	294.847	326.65	525.205	427.535	3570.2	3247.94	2198.26	2425.22		Gm15848	predicted gene 15848 [Source:MGI Symbol;Acc:MGI:3802054]	15.7339	0.798561	4.85628	0.000190306	0.00491551	17.0305	19.7127	2.69482	23.4977	0	0	3.19424	0		Osbpl1a	oxysterol binding protein-like 1A [Source:MGI Symbol;Acc:MGI:1927551]
Mirt2	myocardial infraction associated transcript 2 [Source:MGI Symbol;Acc:MGI:3642813]	1.14135	221.417	100.273	1.29576e-08	4.0371e-07	188.473	263.905	209.722	223.57	112.99	90.7332	114.228	83.1431		Olfm2	olfactomedin 2 [Source:MGI Symbol;Acc:MGI:3045350]	628.076	94.5354	2.72998	3.49396e-43	1.65161e-41	503.325	656.939	673.813	678.226	81.9122	77.0437	122.306	96.8798		Bpifc	BPI fold containing family C [Source:MGI Symbol;Acc:MGI:3026884]	25.0198	7.08378	1.90539	0.000192686	0.00496367	31.5065	20.6983	23.3551	24.5193	6.00254	3.65577	12.777	5.89986		Rcc1	regulator of chromosome condensation 1 [Source:MGI Symbol;Acc:MGI:1913989]
Igkv3-2	immunoglobulin kappa variable 3-2 [Source:MGI Symbol;Acc:MGI:1330850]	1.30134	287.533	116.84	1.34642e-08	4.18316e-07	401.164	212.361	285.601	251.008	120.202	91.5892	133.625	121.943		Vcam1	vascular cell adhesion molecule 1 [Source:MGI Symbol;Acc:MGI:98926]	3207.86	12361.3	-1.9461	3.56022e-43	1.67982e-41	3538.91	2545.87	3072.77	3673.88	12964.4	10306.2	12217.6	13957.2		Gm46224	predicted gene, 46224 [Source:MGI Symbol;Acc:MGI:5825861]	31.5349	88.534	-1.48677	0.000193847	0.00498688	23.8427	30.5547	20.6603	51.0819	50.5928	98.7057	126.173	78.6648		Smg1	SMG1 nonsense mediated mRNA decay associated PI3K related kinase [Source:MGI Symbol;Acc:MGI:1919742]
Zap70	zeta-chain (TCR) associated protein kinase [Source:MGI Symbol;Acc:MGI:99613]	-1.15021	219.155	486.78	1.34965e-08	4.18733e-07	234.802	178.342	258.2	205.278	375.03	496.465	413.806	661.819		Adam8	a disintegrin and metallopeptidase domain 8 [Source:MGI Symbol;Acc:MGI:107825]	652.201	2319.66	-1.83146	3.72762e-43	1.75556e-41	553.211	732.46	632.276	690.857	2300.56	2073.58	2209.08	2695.41		Cdkn1c	cyclin-dependent kinase inhibitor 1C (P57) [Source:MGI Symbol;Acc:MGI:104564]	58.9014	26.1507	1.17626	0.000196276	0.00503593	48.537	80.8221	52.0999	54.1468	27.4402	22.8485	28.7482	25.5661		Nfe2	nuclear factor, erythroid derived 2 [Source:MGI Symbol;Acc:MGI:97308]
Gm31452	predicted gene, 31452 [Source:MGI Symbol;Acc:MGI:5590611]	1.25754	181.14	75.5038	1.36624e-08	4.23286e-07	211.638	160.817	184.428	167.678	90.5522	74.4697	54.9586	82.0345		Srgn	serglycin [Source:MGI Symbol;Acc:MGI:97756]	2523.46	8169.65	-1.69497	4.86764e-43	2.28824e-41	2439.94	2221.95	2667.56	2764.4	8740.03	7826.53	6869.7	9242.34		Fam110c	family with sequence similarity 110, member C [Source:MGI Symbol;Acc:MGI:1918813]	91.1309	39.7891	1.18522	0.000199027	0.00509292	74.9343	68.0088	134.741	86.8391	38.5877	42.0413	30.3453	48.1822		Vdac1	voltage-dependent anion channel 1 [Source:MGI Symbol;Acc:MGI:106919]
Atp13a5	ATPase type 13A5 [Source:MGI Symbol;Acc:MGI:2444068]	-7.70161	0	39.8168	1.39411e-08	4.31318e-07	0	0	0	0	4.00673	59.0622	8.62096	87.5774		Dmd	dystrophin, muscular dystrophy [Source:MGI Symbol;Acc:MGI:94909]	2015.82	673.318	1.58227	5.06877e-43	2.37841e-41	1999.9	1953.53	2108.2	2001.64	747.741	573.425	723.012	649.095		Scn4b	sodium channel, type IV, beta [Source:MGI Symbol;Acc:MGI:2687406]	62.9045	11.0468	2.46363	0.000200939	0.00512999	88.5587	36.4685	60.1844	66.4064	24.8677	4.56971	0	14.7496		Slc43a3	solute carrier family 43, member 3 [Source:MGI Symbol;Acc:MGI:1931054]
Entpd3	ectonucleoside triphosphate diphosphohydrolase 3 [Source:MGI Symbol;Acc:MGI:1321386]	-1.78463	25.4533	87.9364	1.42053e-08	4.38265e-07	26.3231	30.9263	24.2392	20.3246	63.3064	87.3093	99.141	101.989		Osbpl3	oxysterol binding protein-like 3 [Source:MGI Symbol;Acc:MGI:1918970]	394.501	1676.15	-2.0881	5.24422e-43	2.45622e-41	332.076	460.403	360.905	424.62	1969.4	1600.31	1429.79	1705.08		Ms4a8a	membrane-spanning 4-domains, subfamily A, member 8A [Source:MGI Symbol;Acc:MGI:1927657]	107.605	50.8183	1.09514	0.000203615	0.00518962	88.5587	147.845	112.284	81.731	40.3028	54.8365	63.8849	44.2489		Tnks1bp1	tankyrase 1 binding protein 1 [Source:MGI Symbol;Acc:MGI:2446193]
Skint3	selection and upkeep of intraepithelial T cells 3 [Source:MGI Symbol;Acc:MGI:3045331]	1.28749	205.873	84.5454	1.4342e-08	4.41867e-07	260.072	215.453	153.866	194.1	85.7441	66.766	96.9858	88.6859		Nod2	nucleotide-binding oligomerization domain containing 2 [Source:MGI Symbol;Acc:MGI:2429397]	189.609	801.005	-2.07791	6.74634e-43	3.15398e-41	193.587	171.969	233.527	159.354	826.143	782.543	796.612	798.72		C3ar1	complement component 3a receptor 1 [Source:MGI Symbol;Acc:MGI:1097680]	71.246	35.2624	1.00711	0.00020445	0.00520401	62.1614	60.1237	79.9465	82.7526	36.8727	32.9019	31.9424	39.3324		AI506816	expressed sequence AI506816 [Source:MGI Symbol;Acc:MGI:2140929]
ENSMUSG00000119964	novel transcript	4.19663	40.9028	2.05799	1.55409e-08	4.77472e-07	51.5933	40.2042	18.9698	52.8439	4.80808	3.4239	0	0		Taldo1	transaldolase 1 [Source:MGI Symbol;Acc:MGI:1274789]	2510.88	6227.64	-1.3106	8.6405e-43	4.03213e-41	2392.28	2412.11	2675.87	2563.27	6694.56	6613.65	5802.5	5799.87		Gm19696	predicted gene, 19696 [Source:MGI Symbol;Acc:MGI:5011881]	38.7015	12.8572	1.61319	0.000206667	0.00525349	27.2488	50.2674	32.3379	44.952	6.86004	11.8812	15.9712	16.7163		Itgb7	integrin beta 7 [Source:MGI Symbol;Acc:MGI:96616]
Mmp19	matrix metallopeptidase 19 [Source:MGI Symbol;Acc:MGI:1927899]	-1.15321	158.239	352.029	1.57248e-08	4.82452e-07	150.568	191.743	142.273	148.369	269.252	446.818	298.501	393.544		H2-T24	histocompatibility 2, T region locus 24 [Source:MGI Symbol;Acc:MGI:95958]	664.416	1977.87	-1.57373	9.38713e-43	4.37255e-41	662.662	632.372	694.119	668.509	2098.12	2206.75	1870.31	1736.3		Ighv1-34	immunoglobulin heavy variable 1-34 [Source:MGI Symbol;Acc:MGI:4439659]	2.36005	188.878	-6.32476	0.00020818	0.00528498	0	0.985635	5.38965	3.06491	472.486	118.812	0	164.213		Rhobtb2	Rho-related BTB domain containing 2 [Source:MGI Symbol;Acc:MGI:2180557]
C1qa	complement component 1, q subcomponent, alpha polypeptide [Source:MGI Symbol;Acc:MGI:88223]	-2.83981	1011.05	7238.19	1.57801e-08	4.83477e-07	772.846	671.101	2011.85	588.396	4993.19	9549.24	4671.48	9738.82		Tbx21	T-box 21 [Source:MGI Symbol;Acc:MGI:1888984]	65.6679	631.15	-3.27097	1.04187e-42	4.84421e-41	47.6521	47.3142	81.2267	86.4786	609.66	792.449	547.671	574.82		Fcrls	Fc receptor-like S, scavenger receptor [Source:MGI Symbol;Acc:MGI:1933397]	16.0752	1.58852	3.21452	0.000211776	0.00536211	9.36678	28.5834	8.98275	17.3678	1.71501	3.65577	0	0.98331		Smim14	small integral membrane protein 14 [Source:MGI Symbol;Acc:MGI:1915802]
Tmem52	transmembrane protein 52 [Source:MGI Symbol;Acc:MGI:1916921]	-5.0377	10.164	333.719	1.58353e-08	4.84499e-07	15.7939	4.12351	11.5926	9.14606	62.505	579.494	76.511	616.367		Ifi27l2a	interferon, alpha-inducible protein 27 like 2A [Source:MGI Symbol;Acc:MGI:1924183]	202.251	1018.18	-2.33269	1.04533e-42	4.85147e-41	193.587	212.914	161.53	240.974	1091.77	891.505	1193.84	895.6		Klra14-ps	killer cell lectin-like receptor subfamily A, member 14, pseudogene [Source:MGI Symbol;Acc:MGI:1321089]	8.40551	0.214376	4.71775	0.000220897	0.0055565	10.2183	6.89944	6.28792	10.2164	0.857506	0	0	0		Mical1	microtubule associated monooxygenase, calponin and LIM domain containing 1 [Source:MGI Symbol;Acc:MGI:2385847]
Cstb	cystatin B [Source:MGI Symbol;Acc:MGI:109514]	-1.39709	570.323	1502.16	1.62842e-08	4.97545e-07	603.326	456.679	733.498	487.79	972.033	1913.1	980.634	2142.87		Malt1	MALT1 paracaspase [Source:MGI Symbol;Acc:MGI:2445027]	850.102	3072.87	-1.85463	1.1921e-42	5.5226e-41	757.966	815.259	747.655	1079.53	3214.47	3078.44	2874.73	3123.84		Gm5544	predicted gene 5544 [Source:MGI Symbol;Acc:MGI:3648209]	1.81148	16.7319	-3.18082	0.000224361	0.00563627	3.4061	0	1.79655	2.04327	5.14503	18.2788	15.9712	27.5327		Ltf	lactotransferrin [Source:MGI Symbol;Acc:MGI:96837]
Pck1	phosphoenolpyruvate carboxykinase 1, cytosolic [Source:MGI Symbol;Acc:MGI:97501]	-3.12955	7.00036	61.343	1.88499e-08	5.71989e-07	6.31755	8.24702	6.32326	7.1136	31.2525	90.7332	26.9405	96.4459		Etv6	ets variant 6 [Source:MGI Symbol;Acc:MGI:109336]	1293.28	3611.55	-1.48159	1.85366e-42	8.57182e-41	1295.54	1217.43	1277.48	1382.69	3910.72	3962.25	3242.73	3330.51		Hcar1	hydrocarboxylic acid receptor 1 [Source:MGI Symbol;Acc:MGI:2441671]	7.22996	0	5.21599	0.000228182	0.00572478	3.4061	11.8276	4.49137	9.19473	0	0	0	0		Irgm1	immunity-related GTPase family M member 1 [Source:MGI Symbol;Acc:MGI:107567]
4933439C10Rik	RIKEN cDNA 4933439C10 gene [Source:MGI Symbol;Acc:MGI:1921726]	1.09769	336.063	157.015	1.89653e-08	5.747e-07	317.983	338.128	260.308	427.832	150.653	172.907	128.237	176.263		Ccl6	chemokine (C-C motif) ligand 6 [Source:MGI Symbol;Acc:MGI:98263]	525.597	2773.26	-2.40067	1.88499e-42	8.70097e-41	379.728	658.759	480.899	583.002	3250.74	2628.29	2317.32	2896.71		Ighv10-3	immunoglobulin heavy variable V10-3 [Source:MGI Symbol;Acc:MGI:3648785]	107.354	19.3183	2.45501	0.000230672	0.00577971	256.309	26.6121	56.5913	89.9041	36.8727	18.2788	6.38849	15.733		Cmah	cytidine monophospho-N-acetylneuraminic acid hydroxylase [Source:MGI Symbol;Acc:MGI:103227]
Dpep1	dipeptidase 1 [Source:MGI Symbol;Acc:MGI:94917]	-1.2457	191.946	455.341	1.96169e-08	5.93633e-07	205.32	190.712	193.913	177.84	310.121	577.782	345.916	587.544		Dll4	delta like canonical Notch ligand 4 [Source:MGI Symbol;Acc:MGI:1859388]	1119.17	183.736	2.60669	1.91766e-42	8.83577e-41	1096.74	813.44	1192.56	1373.94	194.249	156.289	218.635	165.772		Igkv4-53	immunoglobulin kappa variable 4-53 [Source:MGI Symbol;Acc:MGI:2686266]	41.4136	139.399	-1.75851	0.000236926	0.00591332	30.6549	37.4541	48.5068	49.0386	214.376	135.263	31.9424	176.012		Psmd1	proteasome (prosome, macropain) 26S subunit, non-ATPase, 1 [Source:MGI Symbol;Acc:MGI:1917497]
Cd40lg	CD40 ligand [Source:MGI Symbol;Acc:MGI:88337]	-2.55497	8.57518	50.4932	1.98962e-08	6.00441e-07	7.37047	9.27789	10.5388	7.1136	32.0539	58.2062	47.4153	64.2973		Mcoln2	mucolipin 2 [Source:MGI Symbol;Acc:MGI:1915529]	85.3455	682.522	-3.00128	2.75215e-42	1.26579e-40	78.9238	59.1427	106.149	97.167	795.718	793.55	553.083	587.738		Prdm9	PR domain containing 9 [Source:MGI Symbol;Acc:MGI:2384854]	88.8209	41.1091	1.10401	0.000246929	0.0061391	81.7465	125.176	72.7603	75.6011	53.1653	36.5577	38.3309	36.3825		Anxa1	annexin A1 [Source:MGI Symbol;Acc:MGI:96819]
Popdc3	popeye domain containing 3 [Source:MGI Symbol;Acc:MGI:1930153]	-4.25525	4.42864	84.5258	1.99384e-08	6.00895e-07	5.26462	2.06175	6.32326	4.06491	13.6229	142.092	18.3195	164.069		Rplp0	ribosomal protein, large, P0 [Source:MGI Symbol;Acc:MGI:1927636]	10886.5	25570.6	-1.23195	2.95332e-42	1.35587e-40	10762.7	10537.4	11128.1	11117.8	26658.9	26047.4	22354.9	27221.1		Tnfaip8l3	tumor necrosis factor, alpha-induced protein 8-like 3 [Source:MGI Symbol;Acc:MGI:2685363]	0	6.51796	-5.24852	0.000253595	0.00627239	0	0	0	0	3.43002	10.9673	4.79136	6.88317		Lpar2	lysophosphatidic acid receptor 2 [Source:MGI Symbol;Acc:MGI:1858422]
Fam110c	family with sequence similarity 110, member C [Source:MGI Symbol;Acc:MGI:1918813]	1.77111	82.9106	24.3338	2.0145e-08	6.06296e-07	73.7047	87.6245	73.7714	96.5417	29.6498	16.2635	23.7076	27.7144		Hmga1	high mobility group AT-hook 1 [Source:MGI Symbol;Acc:MGI:96160]	861.227	3107.49	-1.85141	3.13887e-42	1.43847e-40	824.233	928.995	755.962	935.718	3737.53	3122.47	2642.02	2927.92		Gm33424	predicted gene, 33424 [Source:MGI Symbol;Acc:MGI:5592583]	20.2555	4.22805	2.33935	0.000255415	0.0063093	14.4759	22.6696	15.2707	28.6058	4.28753	3.65577	7.98561	0.98331		Isg15	ISG15 ubiquitin-like modifier [Source:MGI Symbol;Acc:MGI:1855694]
Fbln1	fibulin 1 [Source:MGI Symbol;Acc:MGI:95487]	-1.22121	336.197	784.192	2.06555e-08	6.19972e-07	414.852	318.541	245.553	365.842	527.286	919.316	670.28	1019.89		Akna	AT-hook transcription factor [Source:MGI Symbol;Acc:MGI:2140340]	1572.14	5246.25	-1.73906	4.28382e-42	1.95792e-40	1306.71	1570.47	1643.92	1767.47	5298.55	6058.93	4694.17	4933.34		Psme2	proteasome (prosome, macropain) activator subunit 2 (PA28 beta) [Source:MGI Symbol;Acc:MGI:1096365]	1840.72	4801.08	-1.38278	0.000265019	0.00649652	1754.99	2081.66	1565.69	1960.52	1960.26	3865.97	9026.93	4351.15		S1pr3	sphingosine-1-phosphate receptor 3 [Source:MGI Symbol;Acc:MGI:1339365]
Gm32089	predicted gene, 32089 [Source:MGI Symbol;Acc:MGI:5591248]	-3.61527	3.37681	41.4239	2.08361e-08	6.24055e-07	3.15877	5.15439	3.16163	2.03246	24.8417	53.9264	22.63	64.2973		Mfsd7a	major facilitator superfamily domain containing 7A [Source:MGI Symbol;Acc:MGI:2442629]	220.666	1208.89	-2.45395	4.2877e-42	1.95792e-40	219.646	253.859	182.76	226.399	980.606	1085.21	1189.51	1580.22		Zfp366	zinc finger protein 366 [Source:MGI Symbol;Acc:MGI:2178429]	33.8509	74.255	-1.1375	0.000265899	0.00650978	35.7641	25.6265	41.3206	32.6924	99.4706	78.599	63.8849	55.0654		Rin3	Ras and Rab interactor 3 [Source:MGI Symbol;Acc:MGI:2385708]
Mt2	metallothionein 2 [Source:MGI Symbol;Acc:MGI:97172]	-2.87017	15.1385	110.58	2.08479e-08	6.24055e-07	13.688	3.09263	30.5624	13.211	57.697	161.779	76.511	146.332		Bace2	beta-site APP-cleaving enzyme 2 [Source:MGI Symbol;Acc:MGI:1860440]	2149.37	652.279	1.7208	5.11157e-42	2.32996e-40	2162.21	2167.35	2335.27	1932.65	716.146	723.11	548.753	621.107		Tgfb3	transforming growth factor, beta 3 [Source:MGI Symbol;Acc:MGI:98727]	80.1347	31.1163	1.37566	0.000267156	0.00653226	108.144	36.4685	95.2171	80.7093	31.7277	26.5043	36.7338	29.4993		Il10ra	interleukin 10 receptor, alpha [Source:MGI Symbol;Acc:MGI:96538]
Rbfox1	RNA binding protein, fox-1 homolog (C. elegans) 1 [Source:MGI Symbol;Acc:MGI:1926224]	-3.20323	15.8911	146.35	2.23042e-08	6.66746e-07	28.429	9.27789	12.6465	13.211	51.2862	214.849	38.7943	280.469		Kcnn4	potassium intermediate/small conductance calcium-activated channel, subfamily N, member 4 [Source:MGI Symbol;Acc:MGI:1277957]	399.271	1853.37	-2.21598	5.16861e-42	2.35177e-40	323.141	421.278	395.98	456.685	2091.1	2174.83	1582.4	1565.15		Gm26967	predicted gene, 26967 [Source:MGI Symbol;Acc:MGI:5504082]	0	7.9587	-5.54743	0.000270428	0.00658714	0	0	0	0	5.14503	19.1928	1.59712	5.89986		Hdgf	heparin binding growth factor [Source:MGI Symbol;Acc:MGI:1194494]
Gucy1b1	guanylate cyclase 1, soluble, beta 1 [Source:MGI Symbol;Acc:MGI:1860604]	1.17426	309.07	136.685	2.34929e-08	6.99443e-07	303.242	356.683	231.853	344.501	149.852	146.372	155.177	95.3374		Bst2	bone marrow stromal cell antigen 2 [Source:MGI Symbol;Acc:MGI:1916800]	1884.73	8384.2	-2.15324	5.48619e-42	2.49182e-40	2049.04	1354.82	2090.67	2044.39	9108.63	7996.03	9508.47	6923.68		Mapk1ip1	mitogen-activated protein kinase 1 interacting protein 1 [Source:MGI Symbol;Acc:MGI:1916796]	217.742	108.116	1.00084	0.000270842	0.0065889	178.82	293.719	156.3	242.128	135.486	114.243	81.4532	101.281		Hspd1	heat shock protein 1 (chaperonin) [Source:MGI Symbol;Acc:MGI:96242]
Cd209c	CD209c antigen [Source:MGI Symbol;Acc:MGI:2157945]	5.47837	31.732	0.739147	2.53953e-08	7.54054e-07	35.7994	21.6484	38.9934	30.4869	0.801347	0	2.15524	0		Vcan	versican [Source:MGI Symbol;Acc:MGI:102889]	279.327	1446	-2.36989	5.53452e-42	2.50931e-40	329.842	322.1	277.832	187.532	1465.06	1546.38	1316.14	1456.43		Mark1	MAP/microtubule affinity regulating kinase 1 [Source:MGI Symbol;Acc:MGI:2664902]	27.3224	68.5282	-1.33394	0.000273005	0.00663314	17.0305	26.6121	27.8465	37.8006	43.7328	91.3942	62.2877	76.6982		Ncapg	non-SMC condensin I complex, subunit G [Source:MGI Symbol;Acc:MGI:1930197]
Aldh1l1	aldehyde dehydrogenase 1 family, member L1 [Source:MGI Symbol;Acc:MGI:1340024]	-1.36258	98.0025	251.698	2.54395e-08	7.54352e-07	129.51	85.5628	88.5257	88.4119	280.471	280.759	157.333	288.229		Pilrb2	paired immunoglobin-like type 2 receptor beta 2 [Source:MGI Symbol;Acc:MGI:2450535]	71.1873	540.516	-2.93193	6.26803e-42	2.83684e-40	43.9293	87.3492	74.7655	78.7053	565.194	573.425	545.506	477.94		ENSMUSG00000120943	novel transcript, antisense to KO:Ephb1and Ephb1	17.2635	45.4717	-1.41136	0.000284772	0.00689291	10.2183	16.7558	13.4741	28.6058	41.1603	48.4389	43.1223	49.1655		Itga5	integrin alpha 5 (fibronectin receptor alpha) [Source:MGI Symbol;Acc:MGI:96604]
Vwa3a	von Willebrand factor A domain containing 3A [Source:MGI Symbol;Acc:MGI:3041229]	-4.7618	2.59862	70.422	2.81002e-08	8.26837e-07	0	3.09263	5.26938	2.03246	32.0539	148.939	6.46572	94.2288		Il3ra	interleukin 3 receptor, alpha chain [Source:MGI Symbol;Acc:MGI:96553]	331.826	1316.28	-1.98789	8.28467e-42	3.74291e-40	353.668	312.091	261.218	400.328	1329.32	1324.05	1234.97	1376.77		Gm5970	predicted gene 5970 [Source:MGI Symbol;Acc:MGI:3646761]	2.61776	29.8438	-3.53115	0.000290021	0.0070011	1.70305	4.92817	1.79655	2.04327	40.3028	59.4062	0	19.6662		Ttk	Ttk protein kinase [Source:MGI Symbol;Acc:MGI:1194921]
Gpt2	glutamic pyruvate transaminase (alanine aminotransferase) 2 [Source:MGI Symbol;Acc:MGI:1915391]	-1.7747	124.228	425.019	2.81082e-08	8.26837e-07	122.139	90.7172	185.482	98.5742	274.862	587.198	233.844	604.173		Rgs14	regulator of G-protein signaling 14 [Source:MGI Symbol;Acc:MGI:1859709]	252.5	1073.04	-2.09043	1.15647e-41	5.21556e-40	189.864	270.237	259.372	290.529	1014.54	1158.96	1024.99	1093.67		Myo15	myosin XV [Source:MGI Symbol;Acc:MGI:1261811]	24.1614	6.87294	1.77964	0.000290333	0.0070011	31.5065	19.7127	18.8638	26.5626	8.57506	8.22548	4.79136	5.89986		Lck	lymphocyte protein tyrosine kinase [Source:MGI Symbol;Acc:MGI:96756]
Nrg1	neuregulin 1 [Source:MGI Symbol;Acc:MGI:96083]	-1.23128	220.385	517.252	2.84124e-08	8.34675e-07	213.744	181.434	301.409	184.954	606.619	404.876	658.426	399.087		Lpxn	leupaxin [Source:MGI Symbol;Acc:MGI:2147677]	180.959	1096.69	-2.60323	1.24535e-41	5.60648e-40	120.619	176.518	200.298	226.399	1163.15	1176.57	920	1127.04		Sema3f	sema domain, immunoglobulin domain (Ig), short basic domain, secreted, (semaphorin) 3F [Source:MGI Symbol;Acc:MGI:1096347]	18.5348	45.5857	-1.28346	0.000296034	0.00710296	17.0305	16.7558	26.05	14.3029	34.3002	47.525	54.3021	46.2156		Rubcn	RUN domain and cysteine-rich domain containing, Beclin 1-interacting protein [Source:MGI Symbol;Acc:MGI:1915160]
Apol7c	apolipoprotein L 7c [Source:MGI Symbol;Acc:MGI:1920912]	-2.53534	26.1557	151.565	3.08451e-08	9.02544e-07	15.7939	13.4014	63.2326	12.1947	109.784	132.676	186.428	177.372		Slc8b1	solute carrier family 8 (sodium/lithium/calcium exchanger), member B1 [Source:MGI Symbol;Acc:MGI:2180781]	896.557	2548.14	-1.5066	1.3017e-41	5.84984e-40	947.83	858.934	897.186	882.276	2560.34	2889.14	2218.82	2524.26		Clec2i	C-type lectin domain family 2, member i [Source:MGI Symbol;Acc:MGI:2136650]	299.924	136.67	1.14344	0.000312253	0.00745495	219.694	442.55	252.415	285.037	110.618	106.017	214.014	116.031		Slc22a23	solute carrier family 22, member 23 [Source:MGI Symbol;Acc:MGI:1920352]
Akap5	A kinase (PRKA) anchor protein 5 [Source:MGI Symbol;Acc:MGI:2685104]	1.85938	82.3785	22.6457	3.1449e-08	9.17787e-07	52.6462	92.7789	89.5795	94.5092	26.4444	21.3993	17.2419	25.4972		Crybg1	crystallin beta-gamma domain containing 1 [Source:MGI Symbol;Acc:MGI:109544]	563.037	2257.23	-2.00361	2.40697e-41	1.0798e-39	499.603	570.5	654.429	527.617	2677.36	2382.85	2146.31	1822.42		Sfrp2	secreted frizzled-related protein 2 [Source:MGI Symbol;Acc:MGI:108078]	19.9385	2.11809	3.15697	0.000324768	0.00774413	13.6244	37.4541	14.3724	14.3029	2.57252	0	0	5.89986		Micall1	microtubule associated monooxygenase, calponin and LIM domain containing -like 1 [Source:MGI Symbol;Acc:MGI:105870]
Sh3pxd2b	SH3 and PX domains 2B [Source:MGI Symbol;Acc:MGI:2442062]	-1.00507	451.034	905.69	3.19411e-08	9.30921e-07	535.939	377.301	445.79	445.108	641.077	1009.19	837.311	1135.18		Incenp	inner centromere protein [Source:MGI Symbol;Acc:MGI:1313288]	592.686	1988.65	-1.74751	3.3871e-41	1.51682e-39	504.07	634.192	563.972	668.509	2167.16	2084.58	1950.4	1752.45		Psme1	proteasome (prosome, macropain) activator subunit 1 (PA28 alpha) [Source:MGI Symbol;Acc:MGI:1096367]	4560.05	10195.3	-1.1606	0.000327602	0.00778278	4827.3	4973.51	4071.88	4367.5	5223.07	8487.78	17605.1	9465.34		Pdlim2	PDZ and LIM domain 2 [Source:MGI Symbol;Acc:MGI:2384850]
Havcr1	hepatitis A virus cellular receptor 1 [Source:MGI Symbol;Acc:MGI:2159680]	1.77553	129.673	37.6543	3.23287e-08	9.40977e-07	148.462	96.9024	141.22	132.11	57.697	26.5352	43.1048	23.2801		Ebi3	Epstein-Barr virus induced gene 3 [Source:MGI Symbol;Acc:MGI:1354171]	101.211	612.528	-2.59708	3.92873e-41	1.7563e-39	104.984	86.4393	98.7643	114.657	772.315	629.557	552	496.24		Gpat3	glycerol-3-phosphate acyltransferase 3 [Source:MGI Symbol;Acc:MGI:3603816]	318.174	144.47	1.15024	0.000330451	0.00784077	273.34	349.9	359.31	290.145	137.201	82.2548	244.36	114.064		Pacsin1	protein kinase C and casein kinase substrate in neurons 1 [Source:MGI Symbol;Acc:MGI:1345181]
Mterf2	mitochondrial transcription termination factor 2 [Source:MGI Symbol;Acc:MGI:1921488]	1.80402	88.3249	25.4717	3.27137e-08	9.50934e-07	77.9164	115.458	67.4481	92.4768	23.2391	20.5434	22.63	35.4744		Tln2	talin 2 [Source:MGI Symbol;Acc:MGI:1917799]	1482.77	483.201	1.6174	3.95527e-41	1.76507e-39	1543.48	1482.21	1436.24	1469.16	461.048	434.746	466.494	570.515		Cxxc5	CXXC finger 5 [Source:MGI Symbol;Acc:MGI:1914643]	737.437	361.906	1.03225	0.000333458	0.00789265	642.902	726.413	863.242	717.189	324.137	244.936	597.323	281.227		N4bp3	NEDD4 binding protein 3 [Source:MGI Symbol;Acc:MGI:2442218]
Asap3	ArfGAP with SH3 domain, ankyrin repeat and PH domain 3 [Source:MGI Symbol;Acc:MGI:2684986]	-1.51886	52.4492	150.273	3.47176e-08	1.00391e-06	75.8106	52.5747	31.6163	49.7952	157.064	147.228	126.082	170.72		Rgs19	regulator of G-protein signaling 19 [Source:MGI Symbol;Acc:MGI:1915153]	539.722	1707.09	-1.66033	5.40372e-41	2.40725e-39	588.95	519.546	552.896	497.495	1706.11	1971.22	1625.69	1525.32		Igkv2-109	immunoglobulin kappa variable 2-109 [Source:MGI Symbol;Acc:MGI:3642626]	44.9468	170.774	-1.93035	0.000336288	0.00792068	27.2488	42.3823	68.2689	41.8871	231.526	199.239	27.1511	225.178		Cyp4f18	cytochrome P450, family 4, subfamily f, polypeptide 18 [Source:MGI Symbol;Acc:MGI:1919304]
Adamtsl4	ADAMTS-like 4 [Source:MGI Symbol;Acc:MGI:2389008]	-1.48327	125.265	350.402	3.52833e-08	1.0176e-06	68.4401	119.582	200.237	112.801	313.327	309.007	349.149	430.127		Slc6a7	solute carrier family 6 (neurotransmitter transporter, L-proline), member 7 [Source:MGI Symbol;Acc:MGI:2147363]	554.909	60.2042	3.2012	6.21109e-41	2.7621e-39	443.76	539.563	657.198	579.115	37.4456	75.943	74.6824	52.7457		Bend5	BEN domain containing 5 [Source:MGI Symbol;Acc:MGI:1914871]	44.0828	12.1191	1.79952	0.000344823	0.00808762	39.1702	44.3536	45.812	46.9953	16.2926	16.451	0	15.733		Bub1b	BUB1B, mitotic checkpoint serine/threonine kinase [Source:MGI Symbol;Acc:MGI:1333889]
Snhg11	small nucleolar RNA host gene 11 [Source:MGI Symbol;Acc:MGI:2441845]	-3.75168	30.7785	414.499	3.5959e-08	1.03574e-06	22.1114	46.3895	21.0775	33.5355	726.821	625.717	94.8306	210.629		Rps20	ribosomal protein S20 [Source:MGI Symbol;Acc:MGI:1914677]	2401.4	6261.18	-1.38246	7.57994e-41	3.36497e-39	2475.68	2333.86	2546.64	2249.42	6166.82	5867.42	5826.31	7184.18		Kcnk2	potassium channel, subfamily K, member 2 [Source:MGI Symbol;Acc:MGI:109366]	19.5164	1.90372	3.28788	0.000345088	0.00808762	11.0698	32.5259	24.2534	10.2164	1.71501	0	0	5.89986		Lat	linker for activation of T cells [Source:MGI Symbol;Acc:MGI:1342293]
Prdx1	peroxiredoxin 1 [Source:MGI Symbol;Acc:MGI:99523]	-1.02478	3197.65	6506.23	3.62354e-08	1.04235e-06	3168.25	2714.3	4231.32	2676.75	4897.03	7670.38	5268.48	8189.04		Gprasp1	G protein-coupled receptor associated sorting protein 1 [Source:MGI Symbol;Acc:MGI:1917418]	4421.15	1534.57	1.52648	7.62011e-41	3.37693e-39	4354.96	4900.65	4356.71	4072.27	1475.59	1324.05	1687.39	1651.26		Rgs1	regulator of G-protein signaling 1 [Source:MGI Symbol;Acc:MGI:1354694]	52.2635	138.793	-1.41574	0.000345478	0.00808762	39.1702	50.2674	44.0155	75.6011	84.893	242.195	89.4388	138.647		Prelid3b	PRELI domain containing 3B [Source:MGI Symbol;Acc:MGI:1913640]
Ifit3	interferon-induced protein with tetratricopeptide repeats 3 [Source:MGI Symbol;Acc:MGI:1101055]	-2.49811	390.991	2208.93	3.70804e-08	1.06527e-06	405.376	360.807	427.874	369.907	1128.3	3198.77	1039.9	3468.73		Ppp1r18	protein phosphatase 1, regulatory subunit 18 [Source:MGI Symbol;Acc:MGI:1923698]	1874.19	4703.78	-1.32789	8.67371e-41	3.83718e-39	1707.29	1808.86	2052.82	1927.79	4775.48	5069.47	4371.62	4598.56		Gm33858	predicted gene, 33858 [Source:MGI Symbol;Acc:MGI:5593017]	16.9675	2.02051	2.94774	0.000349984	0.00817197	5.96068	27.5978	17.9655	16.3462	4.28753	1.82788	0	1.96662		Tm7sf3	transmembrane 7 superfamily member 3 [Source:MGI Symbol;Acc:MGI:1914873]
Bcl2a1a	B cell leukemia/lymphoma 2 related protein A1a [Source:MGI Symbol;Acc:MGI:102687]	-2.27982	34.9663	169.806	3.74529e-08	1.07179e-06	33.6936	15.4632	64.2865	26.4219	105.778	190.882	112.072	270.492		Mafb	v-maf musculoaponeurotic fibrosarcoma oncogene family, protein B (avian) [Source:MGI Symbol;Acc:MGI:104555]	1771.81	5255.14	-1.56873	8.77395e-41	3.87481e-39	1631.34	1662.36	1915.29	1878.24	5764.28	5516.33	4390.02	5349.92		Noct	nocturnin [Source:MGI Symbol;Acc:MGI:109382]	948.643	1991.18	-1.06897	0.000350355	0.00817197	925.609	1168.96	818.328	881.673	1084.74	2208.08	3016.96	1654.91		Bard1	BRCA1 associated RING domain 1 [Source:MGI Symbol;Acc:MGI:1328361]
Slamf6	SLAM family member 6 [Source:MGI Symbol;Acc:MGI:1353620]	1.248	833.007	350.729	3.89386e-08	1.11287e-06	904.462	1047.37	431.036	949.157	316.532	400.596	323.286	362.504		Slfn8	schlafen 8 [Source:MGI Symbol;Acc:MGI:2672859]	674.403	3062.58	-2.18404	9.23802e-41	4.07271e-39	528.641	545.023	842.727	781.223	3222.66	3202.81	2999.2	2825.66		Gm12159	predicted gene 12159 [Source:MGI Symbol;Acc:MGI:3649482]	9.00735	0.214376	4.81502	0.000351626	0.00819168	2.55458	11.8276	13.4741	8.1731	0.857506	0	0	0		Apol10a	apolipoprotein L 10A [Source:MGI Symbol;Acc:MGI:3036238]
Gfy	golgi-associated olfactory signaling regulator [Source:MGI Symbol;Acc:MGI:2685427]	-10.1439	0.511776	585.631	4.17574e-08	1.19035e-06	0	1.03088	0	1.01623	16.8283	1125.61	17.2419	1182.85		B4galnt4	beta-1,4-N-acetyl-galactosaminyl transferase 4 [Source:MGI Symbol;Acc:MGI:2652891]	36.3548	460.219	-3.66362	9.46547e-41	4.16579e-39	36.4836	19.1076	47.0746	42.7535	484.452	559.117	332.282	465.023		Cd101	CD101 antigen [Source:MGI Symbol;Acc:MGI:2685862]	410.733	163.6	1.32305	0.000353893	0.00823454	381.484	397.211	461.713	402.525	325.852	107.845	108.604	112.097		Atp2a3	ATPase, Ca++ transporting, ubiquitous [Source:MGI Symbol;Acc:MGI:1194503]
Fxyd1	FXYD domain-containing ion transport regulator 1 [Source:MGI Symbol;Acc:MGI:1889273]	-2.02768	80.7849	329.516	4.2059e-08	1.19587e-06	88.4456	46.3895	93.7951	94.5092	141.037	481.057	200.437	495.533		Slc25a5	solute carrier family 25 (mitochondrial carrier, adenine nucleotide translocator), member 5 [Source:MGI Symbol;Acc:MGI:1353496]	3396.49	9066.51	-1.41624	1.04664e-40	4.59837e-39	3783.88	3267.41	3297.07	3237.6	10374.8	8886.44	8724.85	8280		Heyl	hairy/enhancer-of-split related with YRPW motif-like [Source:MGI Symbol;Acc:MGI:1860511]	110.873	24.5028	2.14987	0.00035663	0.00828041	120.917	123.204	110.488	88.8824	49.7353	24.6764	0	23.5994		Siva1	SIVA1, apoptosis-inducing factor [Source:MGI Symbol;Acc:MGI:1353606]
Dntt	deoxynucleotidyltransferase, terminal [Source:MGI Symbol;Acc:MGI:98659]	1.42888	990.654	367.221	4.2169e-08	1.19746e-06	1251.93	984.488	757.738	968.466	609.825	369.781	217.679	271.601		Hmgb2	high mobility group box 2 [Source:MGI Symbol;Acc:MGI:96157]	1235.07	4248.66	-1.78307	1.16469e-40	5.10821e-39	1052.81	1176.48	1179.63	1531.35	4062.84	4762.4	4190.87	3978.53		Gm8091	predicted gene 8091 [Source:MGI Symbol;Acc:MGI:3643169]	78.0099	35.4	1.11584	0.000356725	0.00828041	68.9736	77.8651	69.1672	96.0339	36.8727	33.8159	20.7626	50.1488		Ifitm6	interferon induced transmembrane protein 6 [Source:MGI Symbol;Acc:MGI:2686976]
Gm17344	predicted gene, 17344 [Source:MGI Symbol;Acc:MGI:4936978]	1.51684	144.501	50.4448	4.2916e-08	1.21348e-06	174.785	129.891	141.22	132.11	58.4983	41.0867	70.0453	32.1486		Gmip	Gem-interacting protein [Source:MGI Symbol;Acc:MGI:1926066]	981.497	3529.2	-1.84718	1.25293e-40	5.4858e-39	802.64	979.949	923.954	1219.45	3334.99	3748.72	3278.45	3754.63		Gm15675	predicted gene 15675 [Source:MGI Symbol;Acc:MGI:3783117]	200.899	100.599	1.00579	0.000366075	0.00847698	228.209	244.437	119.471	211.479	90.0381	81.3408	127.77	103.248		Appl1	adaptor protein, phosphotyrosine interaction, PH domain and leucine zipper containing 1 [Source:MGI Symbol;Acc:MGI:1920243]
Grem1	gremlin 1, DAN family BMP antagonist [Source:MGI Symbol;Acc:MGI:1344337]	1.11547	164.706	76.1148	4.29525e-08	1.21348e-06	151.621	192.774	153.866	160.564	79.3333	66.766	82.9767	75.383		Pygl	liver glycogen phosphorylase [Source:MGI Symbol;Acc:MGI:97829]	1047.73	2961.73	-1.49973	1.61597e-40	7.06323e-39	912.091	1156.47	1102.1	1020.25	2988.62	3120.27	2666.92	3071.09		Cgnl1	cingulin-like 1 [Source:MGI Symbol;Acc:MGI:1915428]	58.3871	25.1172	1.21676	0.000389452	0.0089473	44.2793	81.8077	65.5741	41.8871	25.7252	25.5904	25.5539	23.5994		Ptpa	protein phosphatase 2 protein activator [Source:MGI Symbol;Acc:MGI:1346006]
A530020G20Rik	RIKEN cDNA A530020G20 gene [Source:MGI Symbol;Acc:MGI:2442825]	-3.13241	5.44781	47.8697	4.47189e-08	1.26177e-06	8.4234	3.09263	3.16163	7.1136	29.6498	57.3502	29.0957	75.383		Hmcn1	hemicentin 1 [Source:MGI Symbol;Acc:MGI:2685047]	895.675	154.708	2.53439	1.64163e-40	7.16311e-39	808.597	729.73	1143.64	900.738	189.568	152.987	129.882	146.396		Gm32220	predicted gene, 32220 [Source:MGI Symbol;Acc:MGI:5591379]	11.1128	0.491655	4.39271	0.00038964	0.0089473	5.96068	17.7414	12.5758	8.1731	0	0	0	1.96662		Tmod1	tropomodulin 1 [Source:MGI Symbol;Acc:MGI:98775]
Saa3	serum amyloid A 3 [Source:MGI Symbol;Acc:MGI:98223]	-6.74787	150.262	16148.5	4.59051e-08	1.29359e-06	30.5348	12.3705	546.962	11.1785	8939.82	21749.4	10533.7	23371		Cyria	CYFIP related Rac1 interactor A [Source:MGI Symbol;Acc:MGI:1261783]	495.691	2378.91	-2.26324	2.01316e-40	8.76928e-39	421.423	482.24	635.045	444.053	2895.01	2378.45	2349.79	1892.39		Ccdc92	coiled-coil domain containing 92 [Source:MGI Symbol;Acc:MGI:106485]	141.834	69.9873	1.00083	0.000401078	0.00915533	155.829	146.86	141.029	123.618	95.1831	65.8038	38.3309	80.6314		Gmip	Gem-interacting protein [Source:MGI Symbol;Acc:MGI:1926066]
Aif1	allograft inflammatory factor 1 [Source:MGI Symbol;Acc:MGI:1343098]	-2.65276	346.806	2180.88	4.91017e-08	1.3784e-06	309.56	241.225	628.111	208.327	1248.5	2823	1451.55	3200.45		Il12rb2	interleukin 12 receptor, beta 2 [Source:MGI Symbol;Acc:MGI:1270861]	48.6606	890.321	-4.18437	2.16804e-40	9.42783e-39	73.7119	66.4218	35.0752	19.4334	1150.28	845.279	697.035	868.689		Gm28086	predicted gene 28086 [Source:MGI Symbol;Acc:MGI:5578792]	7.68987	0.214376	4.59016	0.000410991	0.00934834	6.81221	9.85635	8.98275	5.10819	0.857506	0	0	0		Prc1	protein regulator of cytokinesis 1 [Source:MGI Symbol;Acc:MGI:1858961]
ENSMUSG00000120972	novel transcript, antisense to Ank1	1.61277	87.7814	28.4336	5.27968e-08	1.47465e-06	97.922	85.5628	84.3102	83.3307	36.0606	31.671	19.3972	26.6058		Prex1	phosphatidylinositol-3,4,5-trisphosphate-dependent Rac exchange factor 1 [Source:MGI Symbol;Acc:MGI:3040696]	2504.86	9200.48	-1.8772	2.32763e-40	1.01046e-38	2100.42	2496.73	2666.64	2755.66	10304.5	10679.4	8221.56	7596.45		Jph3	junctophilin 3 [Source:MGI Symbol;Acc:MGI:1891497]	37.1401	12.3736	1.54885	0.000412661	0.00935316	28.1004	47.3105	47.6086	25.5409	14.5776	12.7952	6.38849	15.733		Cd8a	CD8 antigen, alpha chain [Source:MGI Symbol;Acc:MGI:88346]
Serinc2	serine incorporator 2 [Source:MGI Symbol;Acc:MGI:1919132]	-3.37474	6.5007	67.43	5.41489e-08	1.5067e-06	10.5292	8.24702	3.16163	4.06491	23.2391	112.133	31.251	103.097		Clic1	chloride intracellular channel 1 [Source:MGI Symbol;Acc:MGI:2148924]	2713.48	7004.48	-1.36827	2.42141e-40	1.04939e-38	2543.43	2673.25	2736.79	2900.43	7895.16	7243.2	6493.04	6386.53		Osbpl5	oxysterol binding protein-like 5 [Source:MGI Symbol;Acc:MGI:1930265]	184.659	72.6571	1.32893	0.000413598	0.00936338	194.148	199.098	148.215	197.176	99.4706	95.05	22.3597	73.7482		Smc2	structural maintenance of chromosomes 2 [Source:MGI Symbol;Acc:MGI:106067]
Fetub	fetuin beta [Source:MGI Symbol;Acc:MGI:1890221]	-8.00336	3.13977	804.73	5.53062e-08	1.53697e-06	4.2117	2.06175	5.26938	1.01623	9.61616	1616.93	22.63	1569.74		Nfib	nuclear factor I/B [Source:MGI Symbol;Acc:MGI:103188]	3750.08	1532.79	1.29089	2.50887e-40	1.08545e-38	3907.47	3998.05	3620.13	3474.69	1557.5	1399.99	1631.11	1542.54		Aldob	aldolase B, fructose-bisphosphate [Source:MGI Symbol;Acc:MGI:87995]	56.7474	19.552	1.4979	0.000421281	0.00948154	49.3885	45.3392	70.9637	61.2982	35.1577	17.3649	7.98561	17.6996		Cdt1	chromatin licensing and DNA replication factor 1 [Source:MGI Symbol;Acc:MGI:1914427]
Cyp2s1	cytochrome P450, family 2, subfamily s, polypeptide 1 [Source:MGI Symbol;Acc:MGI:1921384]	-2.18536	12.198	55.5365	5.61262e-08	1.55585e-06	13.688	12.3705	10.5388	12.1947	38.4646	71.0458	53.881	58.7544		Fanca	Fanconi anemia, complementation group A [Source:MGI Symbol;Acc:MGI:1341823]	168.279	894.507	-2.41398	2.95671e-40	1.27704e-38	121.364	167.419	192.914	191.419	793.378	1059.9	840.988	883.759		Palmd	palmdelphin [Source:MGI Symbol;Acc:MGI:2148896]	18.9115	3.72411	2.38113	0.000432966	0.00971045	27.2488	6.89944	25.1517	16.3462	3.43002	2.74183	4.79136	3.93324		Itgb2l	integrin beta 2-like [Source:MGI Symbol;Acc:MGI:1277979]
Fcamr	Fc receptor, IgA, IgM, high affinity [Source:MGI Symbol;Acc:MGI:1927803]	3.28443	37.3369	3.90484	5.6539e-08	1.56533e-06	52.6462	35.0498	18.9698	42.6816	2.40404	3.4239	6.46572	3.32572		Dnaaf3	dynein, axonemal assembly factor 3 [Source:MGI Symbol;Acc:MGI:3588207]	243.04	832.924	-1.77706	3.16699e-40	1.36555e-38	244.962	250.219	223.374	253.606	786.357	956.442	800.941	787.956		Tnnt3	troponin T3, skeletal, fast [Source:MGI Symbol;Acc:MGI:109550]	29.9361	78.4014	-1.3925	0.000436745	0.00976107	17.882	44.3536	35.0327	22.476	96.0406	44.7832	73.4676	99.3143		Tom1l1	target of myb1-like 1 (chicken) [Source:MGI Symbol;Acc:MGI:1919193]
Gm12216	predicted gene 12216 [Source:MGI Symbol;Acc:MGI:3650088]	-1.79879	41.3441	143.769	5.77105e-08	1.59377e-06	32.6407	36.0807	60.071	36.5842	96.1616	211.426	104.529	162.96		Dusp2	dual specificity phosphatase 2 [Source:MGI Symbol;Acc:MGI:101911]	190.214	1068.99	-2.49156	3.34694e-40	1.44071e-38	167.527	228.382	173.53	191.419	1104.64	1087.42	771.718	1312.18		Chrnb1	cholinergic receptor, nicotinic, beta polypeptide 1 (muscle) [Source:MGI Symbol;Acc:MGI:87890]	50.5558	19.8349	1.31626	0.000448789	0.00997313	60.4583	58.1525	45.812	37.8006	19.7226	27.4183	9.58273	22.6161		Chst10	carbohydrate sulfotransferase 10 [Source:MGI Symbol;Acc:MGI:2138283]
Cish	cytokine inducible SH2-containing protein [Source:MGI Symbol;Acc:MGI:103159]	-1.1955	198.053	453.477	5.90928e-08	1.62991e-06	209.532	124.736	274.008	183.937	392.66	528.136	399.797	493.315		Itk	IL2 inducible T cell kinase [Source:MGI Symbol;Acc:MGI:96621]	262.302	1348.56	-2.36396	4.41269e-40	1.89627e-38	229.326	231.111	222.451	366.32	1365.59	1492.45	1201.41	1334.79		Plac8	placenta-specific 8 [Source:MGI Symbol;Acc:MGI:2445289]	6781.5	13872.7	-1.03245	0.00044952	0.00997313	5075.09	6622.48	7858.11	7570.33	8894.91	10889.6	22346.9	13359.2		Trim26	tripartite motif-containing 26 [Source:MGI Symbol;Acc:MGI:1337056]
Cd200r4	CD200 receptor 4 [Source:MGI Symbol;Acc:MGI:3036289]	-1.72837	65.4073	216.816	5.97302e-08	1.64545e-06	50.5404	61.8526	109.603	39.6329	148.249	234.537	191.816	292.664		Ptpre	protein tyrosine phosphatase, receptor type, E [Source:MGI Symbol;Acc:MGI:97813]	801.149	2342.42	-1.5481	4.54833e-40	1.95127e-38	775.091	720.631	872.264	836.608	2432.79	2620.58	2127.91	2188.41		Prss12	protease, serine 12 neurotrypsin (motopsin) [Source:MGI Symbol;Acc:MGI:1100881]	10.9575	0.706031	3.84552	0.000449861	0.00997313	6.81221	8.87071	10.7793	17.3678	0.857506	0	0	1.96662		Cdk1	cyclin-dependent kinase 1 [Source:MGI Symbol;Acc:MGI:88351]
Stk32c	serine/threonine kinase 32C [Source:MGI Symbol;Acc:MGI:2385336]	-1.57928	36.2122	108.114	6.30114e-08	1.72362e-06	53.6991	25.7719	37.9396	27.4382	104.175	108.709	113.15	106.423		Parp11	poly (ADP-ribose) polymerase family, member 11 [Source:MGI Symbol;Acc:MGI:2141505]	571.892	1566.05	-1.45249	5.27611e-40	2.2597e-38	609.798	581.418	547.357	548.993	1640.58	1503.45	1692.8	1427.36		C130046K22Rik	RIKEN cDNA C130046K22 gene [Source:MGI Symbol;Acc:MGI:3026935]	80.4836	39.2949	1.01778	0.000456984	0.0101077	84.3011	64.0663	82.6413	90.9257	40.3028	35.6437	27.1511	54.082		Epor	erythropoietin receptor [Source:MGI Symbol;Acc:MGI:95408]
Mylpf	myosin light chain, phosphorylatable, fast skeletal muscle [Source:MGI Symbol;Acc:MGI:97273]	-3.26921	634.001	6112.46	6.30355e-08	1.72362e-06	980.273	425.752	680.805	449.173	1899.99	9191.45	2660.64	10697.7		Slc24a3	solute carrier family 24 (sodium/potassium/calcium exchanger), member 3 [Source:MGI Symbol;Acc:MGI:2137513]	2104.53	552.191	1.92994	6.56817e-40	2.80836e-38	1748.24	2141.88	2580.8	1947.23	516.047	627.355	533.6	531.763		Ccr4	chemokine (C-C motif) receptor 4 [Source:MGI Symbol;Acc:MGI:107824]	7.95121	0.214376	4.63726	0.00046339	0.0102142	10.2183	10.842	3.5931	7.15146	0.857506	0	0	0		Lsp1	lymphocyte specific 1 [Source:MGI Symbol;Acc:MGI:96832]
Zfp831	zinc finger protein 831 [Source:MGI Symbol;Acc:MGI:3641861]	1.03656	662.061	322.925	6.59917e-08	1.8e-06	677.03	714.398	504.807	752.009	363.811	234.537	407.34	286.012		Zyx	zyxin [Source:MGI Symbol;Acc:MGI:103072]	3425.83	11193.9	-1.70832	6.94627e-40	2.96506e-38	3193.44	2786.99	3705.05	4017.85	12075	11669.9	10078.9	10951.7		Arhgap24	Rho GTPase activating protein 24 [Source:MGI Symbol;Acc:MGI:1922647]	151.526	62.9875	1.24728	0.000464035	0.0102167	131.986	154.745	181.452	137.921	90.0381	65.8038	22.3597	73.7482		Igkv6-23	immunoglobulin kappa variable 6-23 [Source:MGI Symbol;Acc:MGI:3711980]
Ctsc	cathepsin C [Source:MGI Symbol;Acc:MGI:109553]	-1.66719	4631.35	14708.8	6.72378e-08	1.82499e-06	4233.81	3378.18	7427.73	3485.66	13043.5	15899.7	13337.7	16554.3		Il21	interleukin 21 [Source:MGI Symbol;Acc:MGI:1890474]	1.21459	539.197	-8.93239	8.83263e-40	3.76397e-38	0	0	0	4.85835	592.108	559.117	424.282	581.279		Gbp10	guanylate-binding protein 10 [Source:MGI Symbol;Acc:MGI:4359647]	1.90938	20.4873	-3.4536	0.000468421	0.0102898	1.70305	1.97127	0.898275	3.06491	25.7252	36.5577	0	19.6662		Zfp808	zinc finger protein 808 [Source:MGI Symbol;Acc:MGI:3704127]
Mag	myelin-associated glycoprotein [Source:MGI Symbol;Acc:MGI:96912]	-1.33508	79.6575	200.545	6.7425e-08	1.82783e-06	71.5989	85.5628	82.2024	79.2658	291.69	171.195	151.944	187.349		Tmsb4x	thymosin, beta 4, X chromosome [Source:MGI Symbol;Acc:MGI:99510]	13065.5	45911.8	-1.81312	9.08933e-40	3.8669e-38	12542.9	11748.5	12828.3	15142.5	50899	42553.4	36766.5	53428.1		Nrxn1	neurexin I [Source:MGI Symbol;Acc:MGI:1096391]	25.1232	8.18388	1.66913	0.000470074	0.0103023	20.4366	21.684	28.7448	29.6275	8.57506	5.48365	12.777	5.89986		Pik3c2b	phosphatidylinositol-4-phosphate 3-kinase catalytic subunit type 2 beta [Source:MGI Symbol;Acc:MGI:2685045]
Atp9a	ATPase, class II, type 9A [Source:MGI Symbol;Acc:MGI:1330826]	-1.68462	97.8837	314.764	7.00553e-08	1.89449e-06	78.9693	88.6554	123.304	100.607	182.707	436.547	187.506	452.298		Arpc5	actin related protein 2/3 complex, subunit 5 [Source:MGI Symbol;Acc:MGI:1915021]	2902.36	8221.93	-1.50243	9.95165e-40	4.22672e-38	2665.54	2667.79	3003.54	3272.58	8996.3	8807.19	7304.8	7779.45		Epcam	epithelial cell adhesion molecule [Source:MGI Symbol;Acc:MGI:106653]	49.2655	19.7812	1.36298	0.000483988	0.0105834	41.7248	45.3392	61.981	48.0169	10.2901	19.1928	31.9424	17.6996		Man1a	mannosidase 1, alpha [Source:MGI Symbol;Acc:MGI:104677]
Folr2	folate receptor 2 (fetal) [Source:MGI Symbol;Acc:MGI:95569]	-3.98366	3.12874	49.4609	7.04914e-08	1.90396e-06	2.10585	4.12351	5.26938	1.01623	18.431	70.1899	18.3195	90.9031		Pclaf	PCNA clamp associated factor [Source:MGI Symbol;Acc:MGI:1915276]	219.83	1374.62	-2.64679	1.03419e-39	4.38516e-38	176.462	210.184	183.683	308.991	1397.19	1699.36	1251.2	1150.72		Gm30948	predicted gene, 30948 [Source:MGI Symbol;Acc:MGI:5590107]	71.403	23.2979	1.62112	0.000489903	0.0106763	70.6766	103.492	44.0155	67.428	38.5877	9.13942	28.7482	16.7163		Smim1	small integral membrane protein 1 [Source:MGI Symbol;Acc:MGI:1916109]
Cbx2	chromobox 2 [Source:MGI Symbol;Acc:MGI:88289]	1.07692	267.366	126.785	7.09568e-08	1.91419e-06	267.443	314.418	193.913	293.69	133.825	114.7	143.323	115.292		Rbbp8	retinoblastoma binding protein 8, endonuclease [Source:MGI Symbol;Acc:MGI:2442995]	408.354	1355.01	-1.73017	1.08029e-39	4.57303e-38	396.108	421.278	464.285	351.744	1467.4	1442.92	1278.26	1231.45		Stk32c	serine/threonine kinase 32C [Source:MGI Symbol;Acc:MGI:2385336]	19.1886	54.2914	-1.49818	0.000491678	0.0107029	30.6549	18.7271	8.98275	18.3895	36.8727	56.6644	47.9136	75.7149		Fech	ferrochelatase [Source:MGI Symbol;Acc:MGI:95513]
Ighv2-2	immunoglobulin heavy variable 2-2 [Source:MGI Symbol;Acc:MGI:4439894]	-1.79649	122.122	424.17	7.4428e-08	2.00051e-06	100.028	65.9761	237.122	85.3632	382.242	366.357	608.855	339.224		Plaat3	phospholipase A and acyltransferase 3 [Source:MGI Symbol;Acc:MGI:2179715]	1667.46	4312.48	-1.3706	1.42036e-39	6.00266e-38	1786.95	1555.91	1641.15	1685.85	4468.89	4228.6	4751.53	3800.92		Crtam	cytotoxic and regulatory T cell molecule [Source:MGI Symbol;Acc:MGI:1859822]	32.832	65.9335	-1.01583	0.000496603	0.0107857	22.9912	31.5403	35.931	40.8655	78.033	63.062	60.6906	61.9485		Clspn	claspin [Source:MGI Symbol;Acc:MGI:2445153]
Pgr	progesterone receptor [Source:MGI Symbol;Acc:MGI:97567]	3.72393	30.1394	2.14846	8.13881e-08	2.17701e-06	34.7465	28.8646	29.5086	27.4382	3.20539	4.27987	0	1.10857		Sirpb1c	signal-regulatory protein beta 1C [Source:MGI Symbol;Acc:MGI:3807521]	36.6388	812.05	-4.48257	1.51926e-39	6.41001e-38	8.19021	40.0351	51.6897	46.6402	828.483	764.933	842.071	812.714		Slc30a10	solute carrier family 30, member 10 [Source:MGI Symbol;Acc:MGI:2685058]	224.035	106.121	1.0678	0.000498385	0.0108122	277.597	215.854	192.231	210.457	168.929	107.845	67.0791	80.6314		Bicdl1	BICD family like cargo adaptor 1 [Source:MGI Symbol;Acc:MGI:1922915]
Nrbp2	nuclear receptor binding protein 2 [Source:MGI Symbol;Acc:MGI:2385017]	-1.66609	86.9614	275.745	8.29161e-08	2.2152e-06	108.451	93.8098	64.2865	81.2983	262.04	398.884	125.004	317.052		Naip2	NLR family, apoptosis inhibitory protein 2 [Source:MGI Symbol;Acc:MGI:1298226]	362.732	1622.2	-2.15962	1.68769e-39	7.1089e-38	416.211	317.551	422.748	294.416	1775.15	1810.53	1570.49	1332.64		Lancl3	LanC lantibiotic synthetase component C-like 3 (bacterial) [Source:MGI Symbol;Acc:MGI:2443335]	0.662019	10.0861	-3.8793	0.000505863	0.0109497	0.851526	0	1.79655	0	14.5776	11.8812	7.98561	5.89986		Pla2g12a	phospholipase A2, group XIIA [Source:MGI Symbol;Acc:MGI:1913600]
[truncated: 8,034 more rows]
[truncated: 15 more columns]

## Sheet: Supplementary table 4
Supplementary table 4 - List enriched KEGG pathways
Tissue: Skull bone marrow (skBM)													Tissue: Dura mater/Meninges (Men)													Tissue: Femur bone marrow (fBM)														Tissue: Spleen (Sp)
[truncated: 98 more rows]
[truncated: 3 more columns]

## Sheet: Supplementary table 5
Supplementary table 5 - Bulk B cell receptor sequencing quality control
[truncated: 74 more rows]

## Sheet: Supplementary table 6
Supplementary table 6 - B cell receptor repertoire analysis
[truncated: 5,926 more rows]

## Sheet: Supplementary table 7
Supplementary table 7 - CDR3 amino acid length analysis
[truncated: 437 more rows]

[truncated: 2 more sheets: Supplementary table 8, Supplementary table 9]
